# Supplementary material for: Synovial cell cross-talk with cartilage plays a major role in the pathogenesis of osteoarthritis
Source: PubMed Central journal article supplement (PMC7331607; doi:10.1038/s41598-020-67730-y), 2020-07-02
Supplement: 41598_2020_67730_MOESM1_ESM.pdf [file 41598_2020_67730_MOESM1_ESM.pdf]

## **SUPPLEMENTARY INFORMATION**

### **Synovial and Cartilage Cell Cross-Talk in Osteoarthritis Pathogenesis Based on Single Cell RNA Sequencing**

Ching-Heng Chou, Vaibhav Jain, Jason Gibson, David E. Attarian, Collin A. Haraden, Christopher  
B. Yohn, Remi-Martin Laberge, Simon Gregory, Virginia B. Kraus

## **Supplementary Methods**

### **Upstream mediator analysis**

Ingenuity Pathway Analysis (IPA, Qiagen, German) was performed to determine the biological functions, processes and diseases and potential upstream mediators associated with the highly expressed genes of HomC (190 genes input), HTC (188 genes input), preHTC (141 genes input), RegC (48 genes input), PreFC (157 genes input), FC (339 genes input) and RepC (61 genes input). Potential upstream cytokine and growth factor regulators of the chondrocyte genes were identified based on prior knowledge stored in the IPA database of expected effects between transcriptional regulators and their target genes. The activation z-score (determined by IPA representing the likelihood of the predicted transcriptional regulator to activate the downstream gene expression) and overlap p-value (calculated using Fisher's Exact Test for testing whether there is a statistically significant overlap between the dataset genes and the genes that are regulated by a transcriptional regulator) were then computed for each potential upstream regulator to infer the activation state of the predicted regulator and the statistically significant overlap between the dataset genes and highly expressed genes under regulation. For the clustering analysis of scRNA-seq data from intact and damaged cartilage, the alignment strategy of Butler et al.<sup>51</sup> was utilized to promote the identification of common cell types and enable comparative analyses.

### **Trajectory Analysis**

In order to clearly understand the transition between different chondrocyte subtypes in response to disease progression, we performed trajectory analysis on all chondrocyte clusters identified in the clustering and differential expression analysis using the R package Monocle2. The underlying algorithm, 'DDRTree', uses reversed graph embedding to describe multiple fate decisions in a



fully unsupervised manner<sup>52</sup>. Data were imported from the existing Seurat object used in clustering and differential expression analysis. Basic filtering for minimum gene and cell observance frequency cut-offs was then performed as well as size and dispersion estimates on count data. We reduced dimensionality by performing a Principle Component Analysis (PCA) followed by t-SNE to project cells into two dimensions<sup>52</sup>. Density peak clustering, based on each cell's local density (P) and the nearest distance ( $\Delta$ ) of a cell to another cell with higher distance, identifies cell clusters in 2-D t-SNE space<sup>52</sup>. We performed differential gene expression testing as a way to extract the genes that distinguish clusters. We used select top significant genes across all clusters as input for the reversed graph embedding (RGE) algorithm that was used to define progress through the trajectory<sup>52</sup>. We used the RGE algorithm, 'DDRTree', to construct a principal tree on the population of single cells that describes changes in global gene expression as a cell progresses through the biological process under study (pseudotime) as well as identifies branch points that describe significant divergences in cellular state. Genes with significant branch-dependent expression were identified using branch expression analysis modeling (BEAM)<sup>51</sup>. GO pathway enrichment analyses were performed using String Database: (<https://string-db.org/>) for all differentially expressed (DE) genes of each state. Ingenuity Pathway analysis (Qiagen, German) was conducted to identify upstream regulators of Highly expressed genes from each state.

### **qRT-PCR for validation of gene expression in cartilage**

The processes of cartilage harvest, sectioning, grinding, and extraction were performed as previously described<sup>4</sup>. Regions of interest were sectioned and powdered under liquid nitrogen; ~100 mg of cartilage powder was used for RNA isolation with Trizol (Thermo Scientific, IL). A total of 1000 ng RNA from each sample was converted into cDNA using the iScript cDNA synthesis kit (Bio-rad, CA). To determine expression of upstream regulators, we performed qRT-

PCR for Interleukin 1 alpha (*IL1A*), Interleukin 1 beta (*IL1B*), Interleukin 6 (*IL6*), TNF alpha (*TNF*), and the Glyceraldehyde Phosphate Dehydrogenase (*GAPDH*) housekeeping gene on 20 cDNA samples from 10 matched damaged and non-damaged knee articular cartilages. If gene expression was undetectable, the Ct value of 40 was assigned. cDNA from the C28/I2 immortalized chondrocyte cell line was used as a positive control for every qRT-PCR run. Forward (F) and Reverse (R) primer sequences used to detect expression were: *IL1A-F*: TGGTAGTAGCAACCAACGGGA, *IL1A-R*: ACTTTGATTGAGGGCGTCATTC; *IL1B-F*: ATGATGGCTTATTACAGTGGCAA, *IL1B-R*: GTCGGAGATTCGTAGCTGGA; *IL6-F*: ACTCACCTCTTCAGAACGAATTG, *IL6-R*: CCATCTTTGGAAGGTTTCAGGTTG; *TNF-F*: CCTCTCTCTAATCAGCCCTCTG, *TNF-R*: GAGGACCTGGGAGTAGATGAG; *GAPDH-F*: GAGTCAACGGATTTGGTCGT, *GAPDH-R*: TTGATTTTGGAGGGATCTCG).

### **Immunofluorescence staining for detection of cytokine expression**

Synovial tissue and full depth cartilage (~2cm length x 5mm width) from 5 OA knees were snap frozen in liquid nitrogen and embedded in optimal cutting temperature compound (VWR, PA); 10 µm and 5 µm sections were prepared from matched cartilage and synovial tissues, respectively, and stored at -80°C. The staining protocol followed the manufacturer's instructions (Abcam, MA). After 4% paraformaldehyde fixation, methanol permeabilization, and 1% bovine serum albumin blocking, sections were incubated at 4°C overnight with primary antibodies. After washing, sections were reacted with secondary antibodies for 1 hour. Slides were then mounted with Vector® trueVIEW™ autofluorescence quenching reagent with DAPI (Vector, CA) and imaged via Zeiss axio imager. Primary antibodies were as follow anti-IL1B (1:100, Cat#12703 from Cell Signaling Technology, MA; 1:100, TA506443S from Thermo scientific, IL), anti-HLA-DQA1(1:100, ab211930, Abcam, MA), anti-HLA-DQA2 (1:300, SAB2501821, Sigma-Aldrich,

Mo), anti-TLR2 (1:50, MA532787, Thermo Scientific, IL), anti-OLR1 (1:300, PA580872, Thermo Scientific, IL), anti-CCL3 (1:50, Cat# 710127, Thermo Scientific, IL), anti-CD163 (1:200, ab156769, Abcam, MA), anti-CD169 (1:50, MABT328, Sigma-Aldrich, Mo), anti-STAB1 (1:100, ab101035, Abcam, MA), anti-IL6 (1:200, PA126811, Thermo Scientific, IL), anti-CD14 (1:25, Cat# 14-0149-82 Thermo Scientific, IL). Secondary antibodies used were as follows: donkey anti-rabbit Alexfluor-488, donkey anti-mouse Alexfluor-488, Donkey anti-goat Alexfluor-568, donkey anti-rabbit Alexfluor-647 and donkey anti-mous Alexfluor-647 (1:500, Thermo scientific, IL)

### **Quantification of Cytokines and growth factors in OA synovial fluids**

Synovial fluid was obtained by direct aspiration from OA knees; the supernatant was collected by centrifugation for 15 minutes at 3000rpm in 4°C, aliquoted and stored immediately at -80°C until analysis. TNF, IL6, IL1A, IL1B, IL15, CCL5 and BDNF in OA synovial fluid samples were quantified using multi-analyte profile (Myriad RBM, TX) as described in our previous study<sup>53</sup> (Supplementary Fig. S8a). Protein expression of cytokines in the synovial fluid of the three scRNA-seq cases was profiled using the proteome profiler array human XL cytokine array kit (ARY022B, R&D Systems, MN) for TNF, IL6, IL1A, IL1B, CXCL12, IL15, C5, CCL5, TNFSF13B, BDNF, HGF, ANGPT2 and PDGF-BB (PDGFB) (Supplementary Fig. S8b). Synovial fluid protein expression of BMP6 (ARY022B, RayBiotech, GA), FGF10 (LS-F11445, LSBio, WA) and IL18 (L45SA-1, Mesoscale Discovery, MD) was analyzed in 12 OA synovial fluid samples (original 3 plus 9 independent patients) using ELISA-based methods according to the manufacturers' instructions.

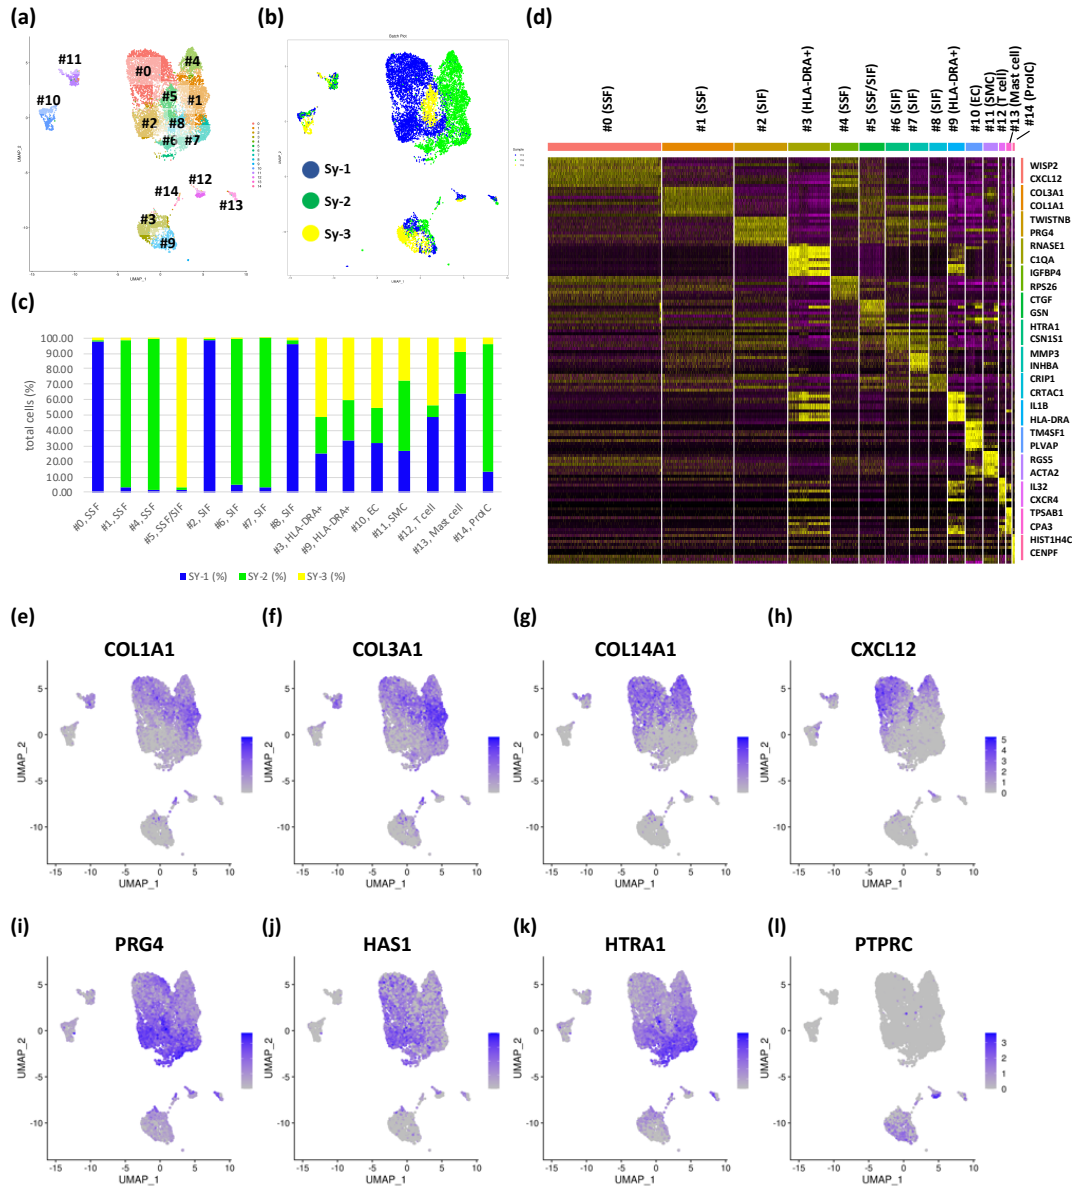

**Supplementary Figure S1. Sc-RNA-seq analysis of OA synovial tissues.** (a) UMAP plots of scRNA-seq showing the 15 clusters from unsupervised analysis (colored according to putative cell types for human OA synovium) from (b) three human OA synovial tissues, and (c) the bar graphic shows the proportion of acquired cells for each cluster among individuals. (d) Heatmap of unsupervised clustering analysis showing the top ten highly expressed genes per cluster as determined by Seurat analysis with top two genes per cluster highlighted on the right. Expression level is scaled based on z-score distribution. Expression of the selected matrix component

associated highly expressed genes, (e) *COL1A1*, (f) *COL3A1*, (g) *COL14A1* and (h) the stromal cell-derived factor 1 (*CXCL12*) were mainly detected in clusters 0, 1, 4, and half of 5. Expression of genes producing essential constituents of synovial fluid, including (i) lubricin (*PRG4*) and (j) hyaluronan (*HAS1*), and synovial fibroblast serine protease, (k) *HTRAI* were mainly detected in clusters 2, 6, 7, 8 and the other half of 5. (l) Four immune subpopulations with broadly expressed *PTPRC* (CD45, a known leukocyte common antigen) were mainly detected in clusters 3, 9, 12 and 13. SMC, smooth muscle cell; EC, endothelial cell; ProIC, proliferating immune cell; SSF, synovial subintimal fibroblast; SIF, synovial intimal fibroblast; UMAP, uniform manifold approximation and projection. SY-1, -2, -3 represent cells originating from three separate patients.

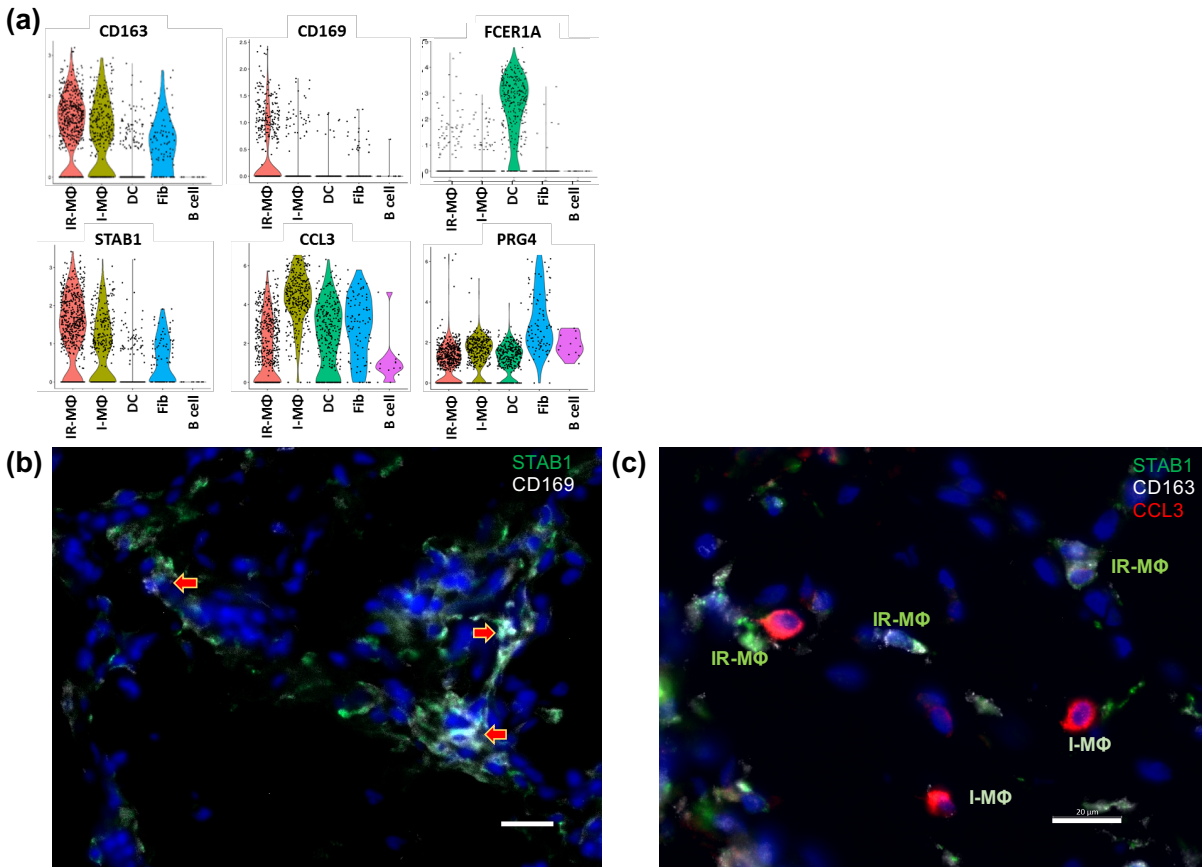

**Supplementary Figure S2. Gene expression profiles of HLA-DRA<sup>+</sup> synoviocytes.** (a) Violin plots showing expression levels of specific marker genes across *HLA-DRA* expressing cells. (b) Representative immunofluorescence staining of human OA synovium demonstrating expression of immune regulatory biomarkers, CD169 and STAB1, by IR-MΦ. (c) Representative immunofluorescence staining of human OA synovium shows CCL3 was highly expressed in I-MΦ (STAB1<sup>low</sup>), but not IR-MΦ (STAB1<sup>high</sup>). DNA was stained using DAPI (blue). Scale bar= 20μm.

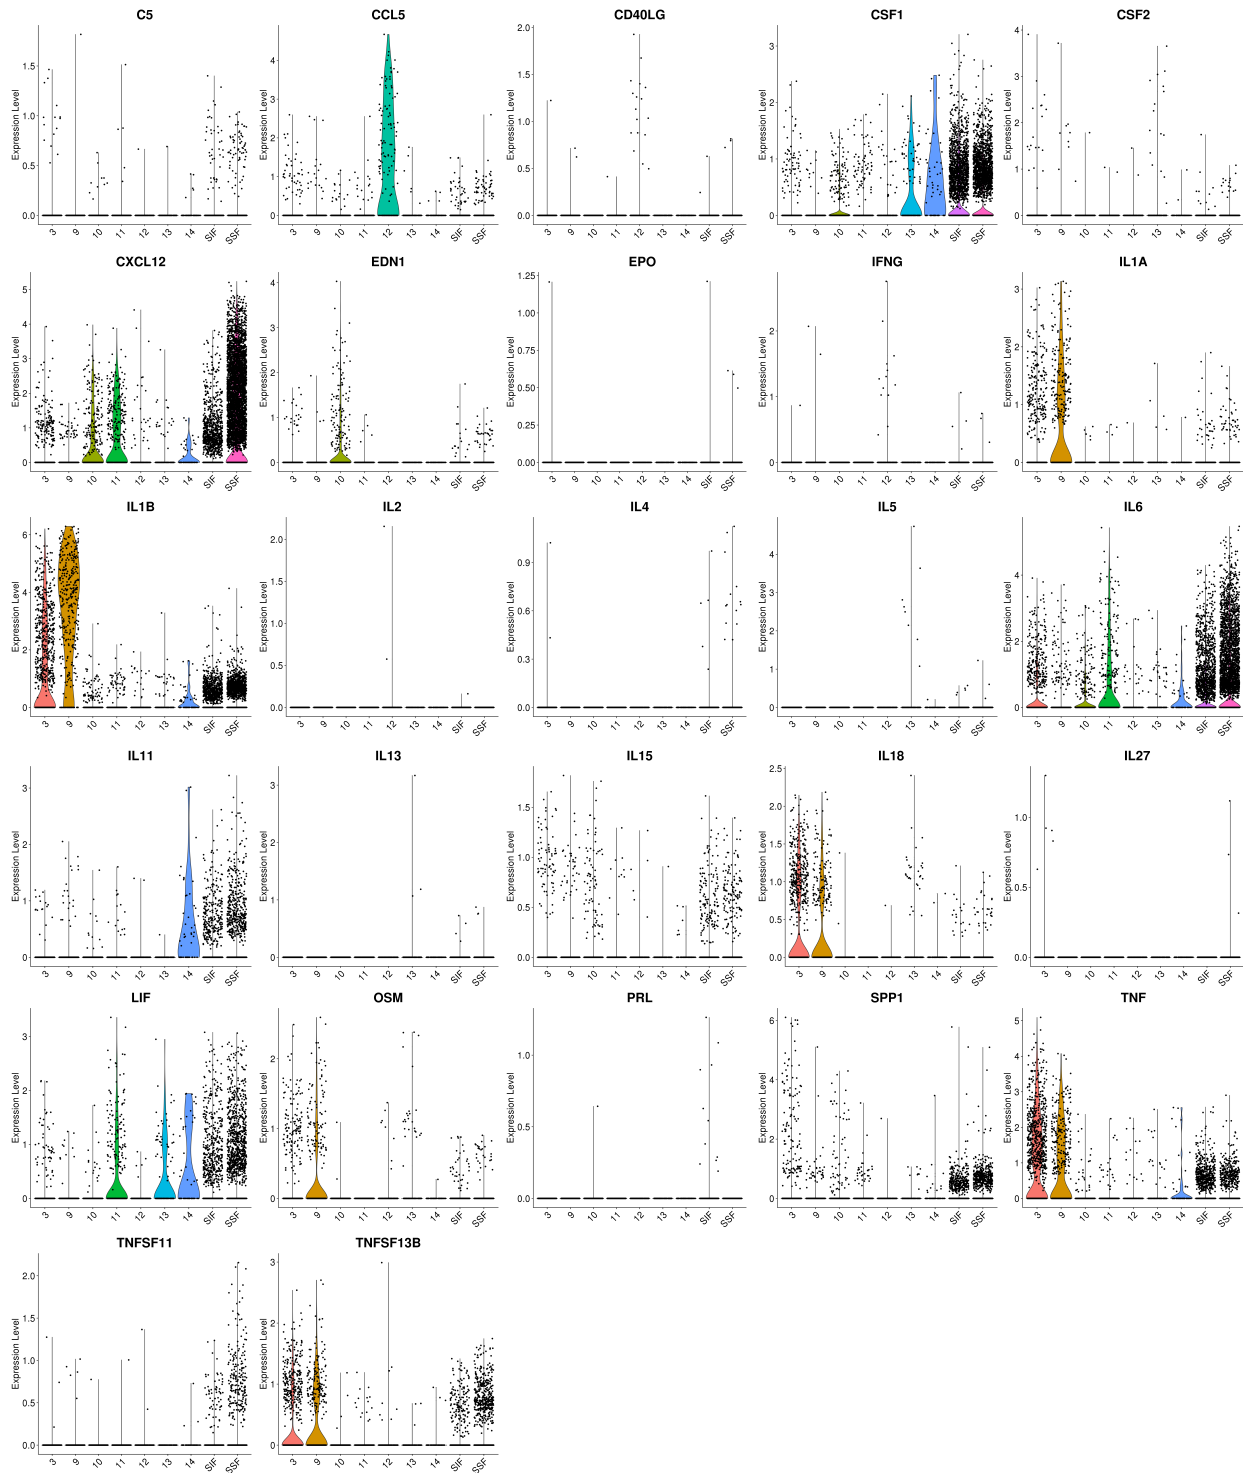

**Supplementary Figure S3. Violin plots of synovial cell expression of upstream cytokines predicted to regulate OA chondrocyte phenotypes. 27 of 31 cytokines were detected in OA synovial tissues across all synovial cell clusters; 17 cytokines (*TNF*, *IL6*, *IL1B*, *IL1A*, *EDN1*, *OSM*,**

*CXCL12, IL15, IL18, C5, CCL5, TNFSF13B, TNFSF11, CSF1, LIF, SPP1 and IL11*) were expressed in >1% of synoviocytes. Clusters left to right: #3, *HLA-DRA*<sup>+</sup> cells; #9, *HLA-DRA*<sup>+</sup> cells; #10, SMC; #11, EC; #12, T cells; #13, mast cells; #14, ProIC, synovial intimal, and subintimal fibroblast. 4 predicted upstream cytokines (*IFNA2, IL17A, IL3* and *WNT1*) were not detected in synovial tissues.



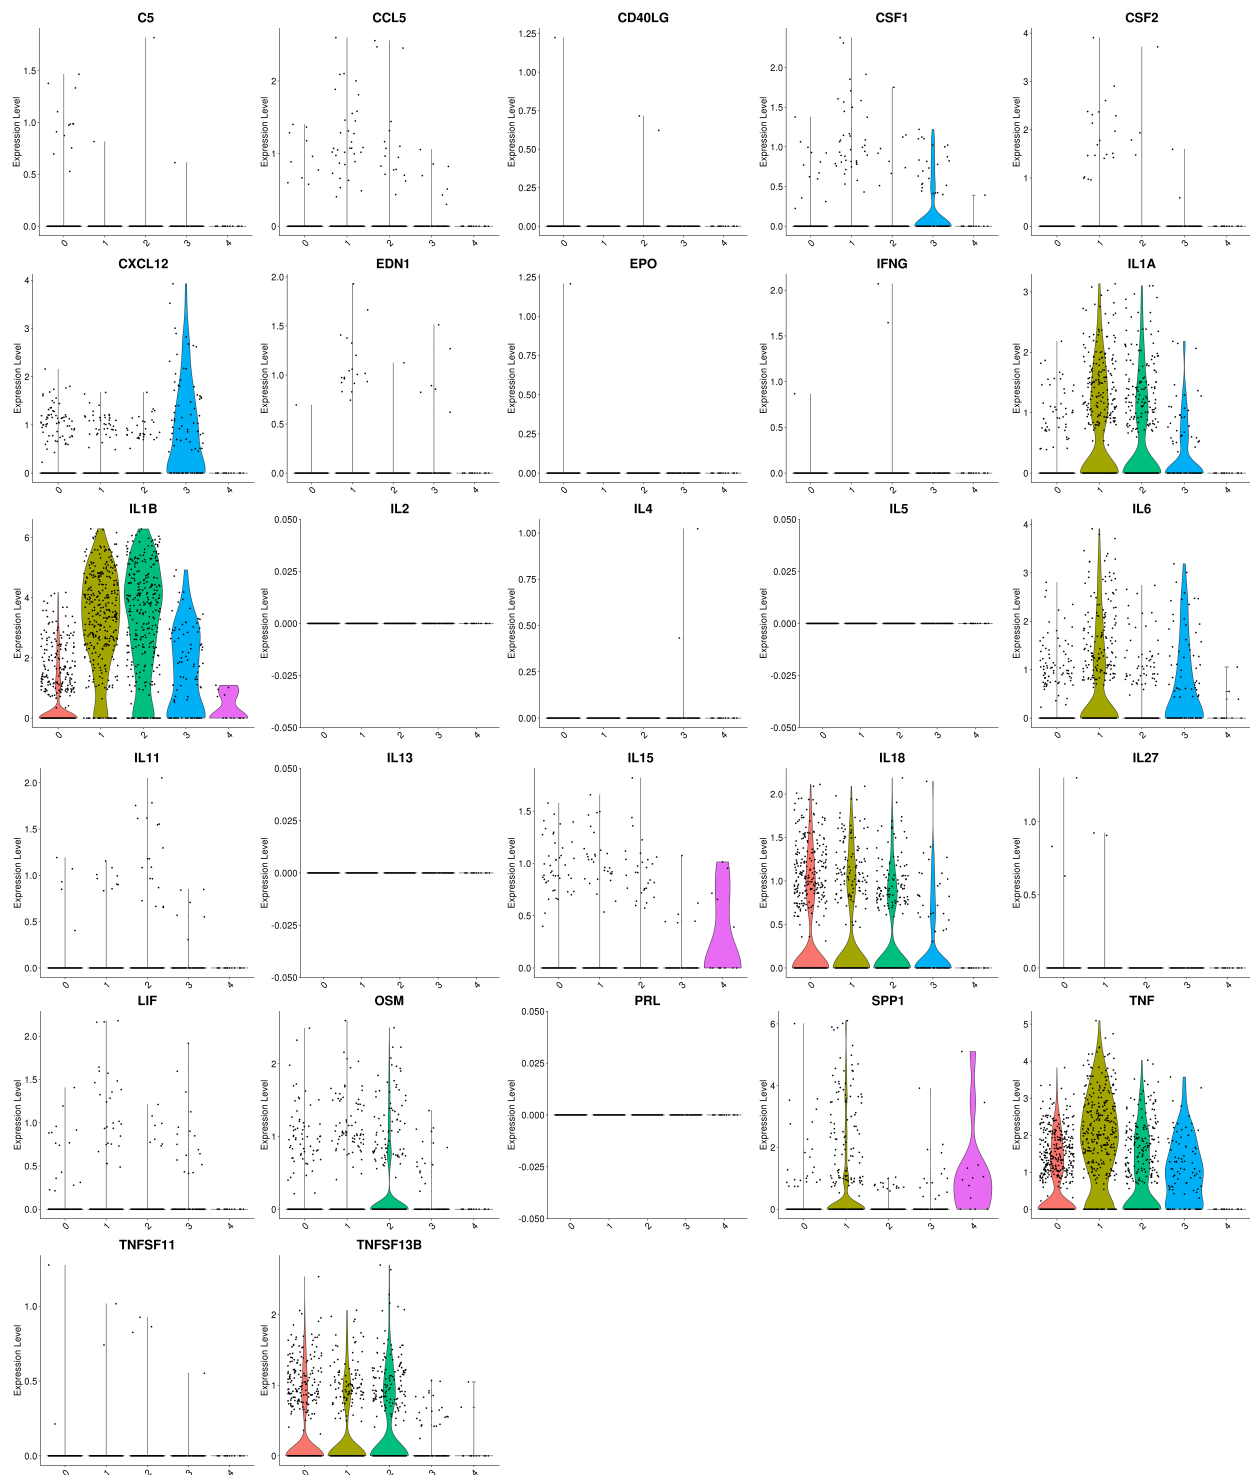

**Supplementary Figure S4. Violin plots of synovial *HLA-DRA*<sup>+</sup> cell clusters expressing upstream cytokines predicted to regulate OA chondrocyte phenotypes. 27 expressing upstream cytokines were plotted across all synovial *HLA-DRA*<sup>+</sup> cell clusters (clusters left to right):**

#0 IR-MΦ, #1, I-MΦ, #2, DC, #3, FIB, #4, B cells). 4 predicted upstream cytokines (*IFNA2*, *IL17A*, *IL3* and *WNT1*) are not expressed in *HLA-DRA*<sup>+</sup> cells.

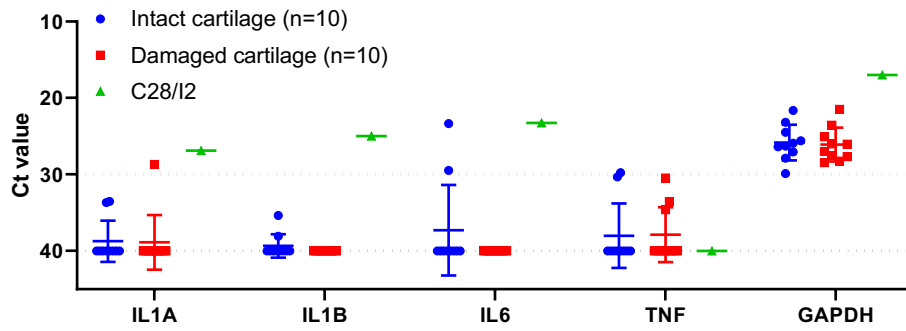

**Supplementary Figure S5. General lack of cytokine expression by chondrocytes.** Top predicted upstream cytokines regulators of the OA chondrocyte phenotypes, *IL1A*, *IL1B*, *IL6* and *TNF*, were not detected or detected at low levels in bulk mRNA from either human intact or damaged OA cartilage. The immortalized C28/I2 chondrocyte cell line was used as a positive control. *GAPDH* was used as a housekeeping control.

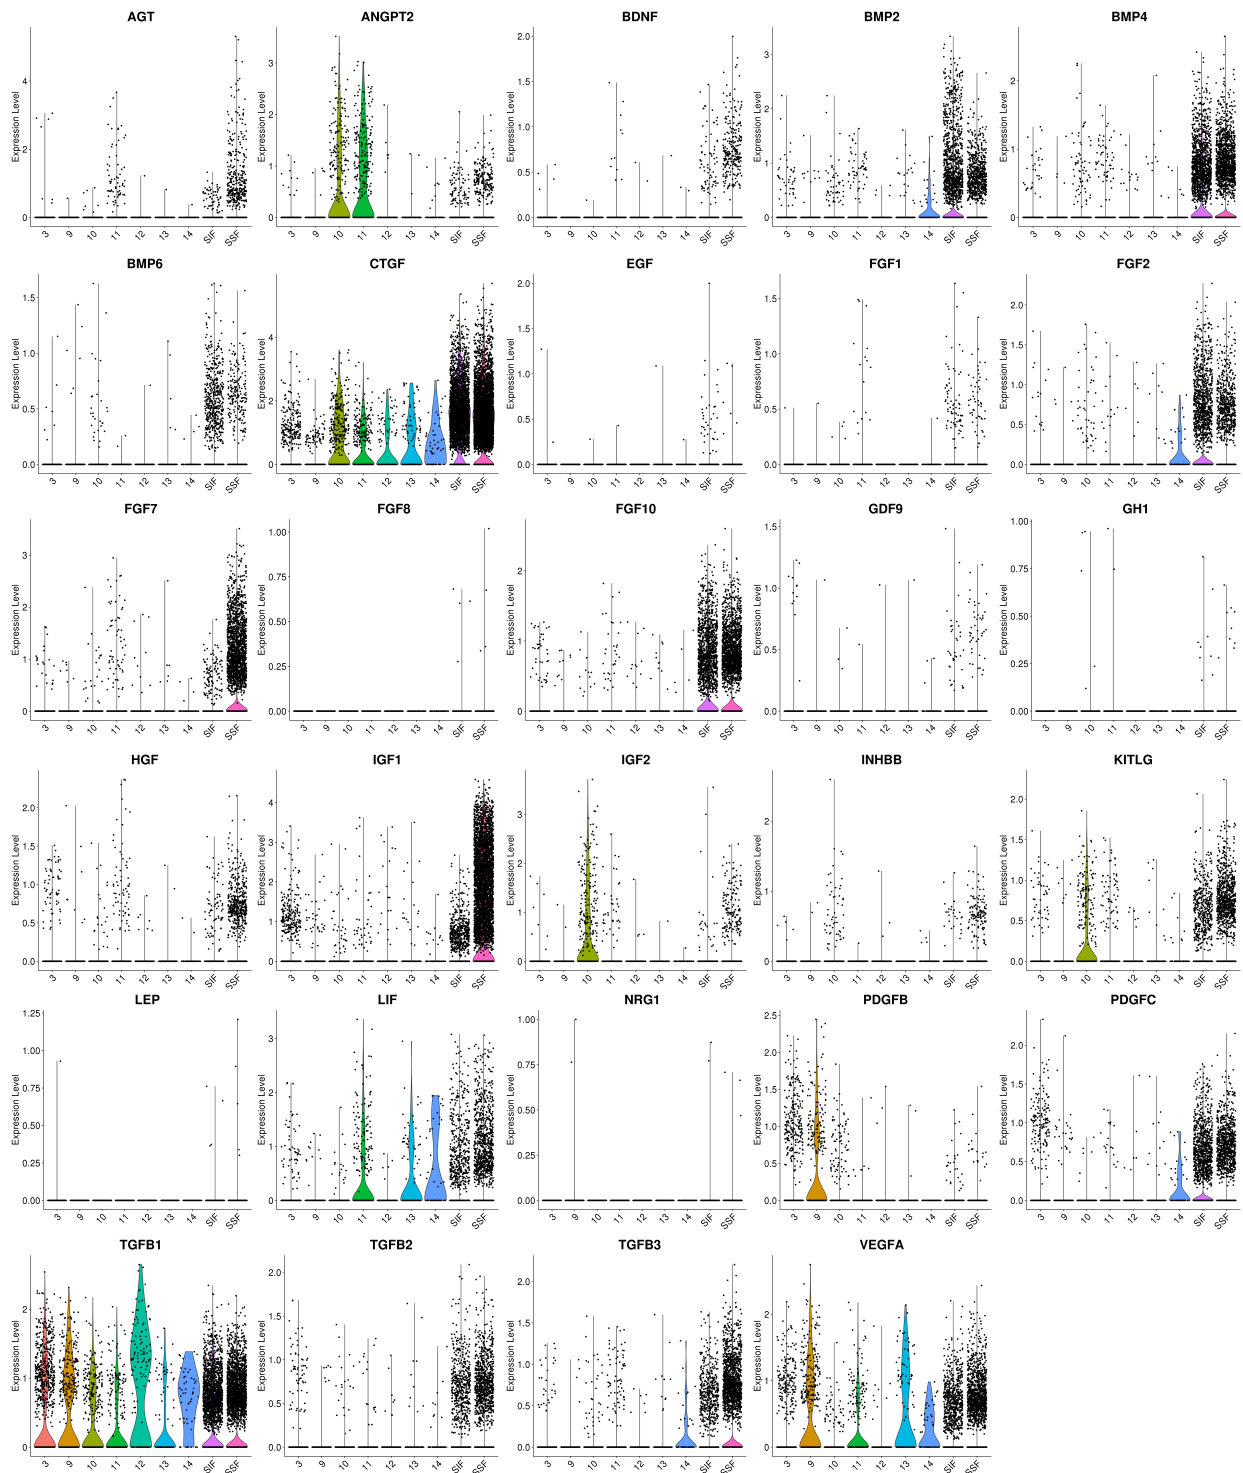

**Supplementary Figure S6. Violin plots of synovial cell expression of upstream growth factors predicted to regulate OA chondrocyte phenotypes. 29 of 30 growth factors were detected in OA synovial tissues across all synovial cell clusters; 23 growth factors (*IGF1*, *HGF*, *ANGP2*,**

*PDGFB, FGF10, INHBB, BMP6, BDNF, TGFB1, TGFB2, TGFB3, AGT, FGF2, FGF7, BMP2, BMP4, VEGFA, CTGF, KITLG, NGF, PDGFC, IGF2, FGF1*) were expressed in >1% of synoviocytes. Clusters left to right): #3, HLA-DR+ cells; #9, HLA-DR+ cells; #10, SMC; #11 EC, #12 T cells, #13 mast cell, #14 ProIC, synovial intimal and subintimal fibroblast). Predicted upstream growth factor, GDF2, was not expressed in synovial tissues.

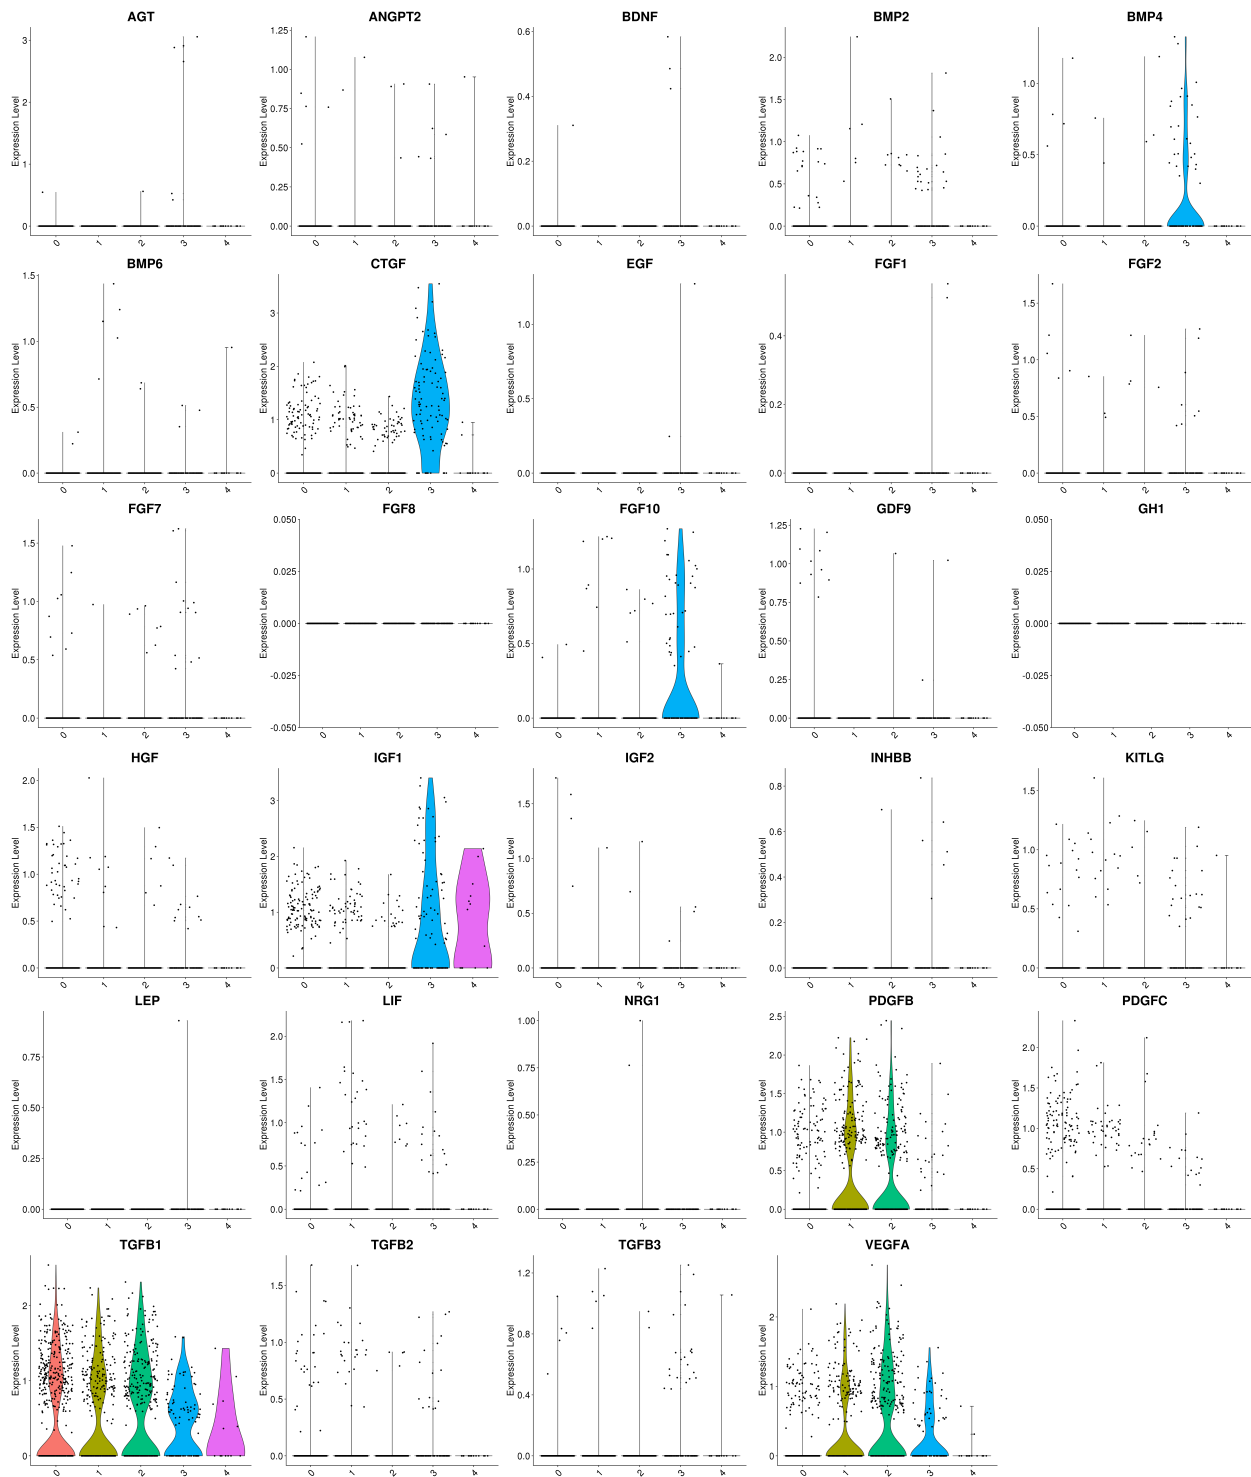

**Supplementary Figure S7. Violin plots of synovial *HLA-DRA*<sup>+</sup> cell clusters expressing upstream growth factors predicted to regulate OA chondrocyte phenotypes. 29 of 30 growth factors were plotted across all synovial *HLA-DRA*<sup>+</sup> cell clusters (clusters left to right): #0 IR-MΦ,**

#1, I-MΦ, #2, DC, #3, FIB, #4, B cells). Predicted upstream growth factor, GDF2, is not expressed in *HLA-DRA*<sup>+</sup> cells.

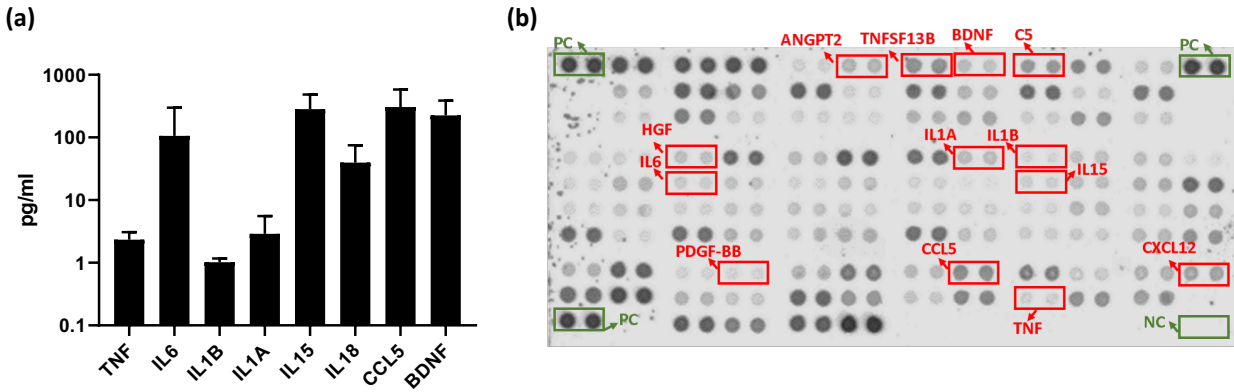

**Supplementary Figure S8. Identification of regulatory cytokines in OA synovial fluid. (a)**

Predicted upstream regulators TNF, IL6, IL1A, IL1B, IL15, CCL5 and BDNF in OA synovial fluid samples were quantified using multi-analyte profile (Myriad RBM, TX) as described in our previous study<sup>31</sup>. (b) Protein expression of cytokines in the synovial fluid of the three scRNA-seq cases was profiled using the proteome profiler array human XL cytokine array kit (ARY022B, R&D Systems, MN) for TNF, IL6, IL1A, IL1B, CXCL12, IL15, C5, CCL5, TNFSF13B, BDNF, HGF, ANGPT2 and PDGF-BB (PDGFB).



**Supplementary Table S1A.** List of differentially expressed genes in osteoarthritic synoviocytes.

| <b>Gene</b> | <b>Putative cell type of the cluster</b> | <b>The percentage of cells expressing the gene in the cluster</b> | <b>The percentage of cells expressing the gene in the other clusters</b> | <b>Log fold-change of the average expression between the two groups</b> | <b>Adjusted p-value (Bonferroni correction)</b> |
|-------------|------------------------------------------|-------------------------------------------------------------------|--------------------------------------------------------------------------|-------------------------------------------------------------------------|-------------------------------------------------|
| RNASE1      | HLA-DR+1                                 | 98.40%                                                            | 19.30%                                                                   | 3.21                                                                    | 0.00E+00                                        |
| C1QA        | HLA-DR+1                                 | 98.80%                                                            | 14.10%                                                                   | 3.21                                                                    | 0.00E+00                                        |
| C1QB        | HLA-DR+1                                 | 97.40%                                                            | 12.40%                                                                   | 2.99                                                                    | 0.00E+00                                        |
| C1QC        | HLA-DR+1                                 | 97.10%                                                            | 8.00%                                                                    | 2.85                                                                    | 0.00E+00                                        |
| CCL4        | HLA-DR+1                                 | 70.90%                                                            | 31.10%                                                                   | 2.79                                                                    | 0.00E+00                                        |
| MARCO       | HLA-DR+1                                 | 90.80%                                                            | 8.00%                                                                    | 2.65                                                                    | 0.00E+00                                        |
| TYROBP      | HLA-DR+1                                 | 99.60%                                                            | 14.20%                                                                   | 2.63                                                                    | 0.00E+00                                        |
| CCL3        | HLA-DR+1                                 | 75.90%                                                            | 38.40%                                                                   | 2.60                                                                    | 0.00E+00                                        |
| AIF1        | HLA-DR+1                                 | 97.90%                                                            | 9.40%                                                                    | 2.47                                                                    | 0.00E+00                                        |
| FOLR2       | HLA-DR+1                                 | 90.90%                                                            | 5.70%                                                                    | 2.35                                                                    | 0.00E+00                                        |
| CD74        | HLA-DR+1                                 | 99.20%                                                            | 45.50%                                                                   | 2.28                                                                    | 0.00E+00                                        |
| FCER1G      | HLA-DR+1                                 | 98.40%                                                            | 13.10%                                                                   | 2.24                                                                    | 0.00E+00                                        |
| CTSZ        | HLA-DR+1                                 | 95.70%                                                            | 40.50%                                                                   | 2.08                                                                    | 0.00E+00                                        |
| HLA-DRB1    | HLA-DR+1                                 | 94.60%                                                            | 25.20%                                                                   | 2.03                                                                    | 0.00E+00                                        |
| LAPTM5      | HLA-DR+1                                 | 97.00%                                                            | 14.80%                                                                   | 2.00                                                                    | 0.00E+00                                        |
| HLA-DRA     | HLA-DR+1                                 | 97.80%                                                            | 34.50%                                                                   | 1.90                                                                    | 0.00E+00                                        |
| CD14        | HLA-DR+1                                 | 92.50%                                                            | 27.80%                                                                   | 1.90                                                                    | 0.00E+00                                        |
| MS4A6A      | HLA-DR+1                                 | 92.20%                                                            | 7.00%                                                                    | 1.87                                                                    | 0.00E+00                                        |
| LYZ         | HLA-DR+1                                 | 90.90%                                                            | 8.60%                                                                    | 1.87                                                                    | 0.00E+00                                        |
| CTSS        | HLA-DR+1                                 | 95.50%                                                            | 25.90%                                                                   | 1.85                                                                    | 0.00E+00                                        |
| SEPP1       | HLA-DR+1                                 | 92.80%                                                            | 71.20%                                                                   | 1.85                                                                    | 0.00E+00                                        |
| FTL         | HLA-DR+1                                 | 100.00%                                                           | 99.80%                                                                   | 1.84                                                                    | 0.00E+00                                        |
| LYVE1       | HLA-DR+1                                 | 66.80%                                                            | 5.00%                                                                    | 1.84                                                                    | 0.00E+00                                        |
| VAMP8       | HLA-DR+1                                 | 92.90%                                                            | 11.80%                                                                   | 1.80                                                                    | 0.00E+00                                        |
| LGMN        | HLA-DR+1                                 | 85.30%                                                            | 40.10%                                                                   | 1.78                                                                    | 0.00E+00                                        |
| VSIG4       | HLA-DR+1                                 | 85.90%                                                            | 5.80%                                                                    | 1.76                                                                    | 0.00E+00                                        |
| HLA-DPA1    | HLA-DR+1                                 | 92.50%                                                            | 25.00%                                                                   | 1.72                                                                    | 0.00E+00                                        |
| CYBB        | HLA-DR+1                                 | 83.90%                                                            | 3.70%                                                                    | 1.67                                                                    | 0.00E+00                                        |
| TNF         | HLA-DR+1                                 | 62.50%                                                            | 11.50%                                                                   | 1.66                                                                    | 0.00E+00                                        |
| HLA-DRB5    | HLA-DR+1                                 | 91.60%                                                            | 13.20%                                                                   | 1.63                                                                    | 0.00E+00                                        |
| HLA-DPB1    | HLA-DR+1                                 | 90.90%                                                            | 35.10%                                                                   | 1.63                                                                    | 0.00E+00                                        |

|          |           |         |         |      |          |
|----------|-----------|---------|---------|------|----------|
| F13A1    | HLA-DR+-1 | 63.10%  | 3.60%   | 1.60 | 0.00E+00 |
| ALOX5AP  | HLA-DR+-1 | 83.40%  | 7.70%   | 1.59 | 0.00E+00 |
| HLA-DMA  | HLA-DR+-1 | 85.70%  | 14.80%  | 1.57 | 0.00E+00 |
| NCF1     | HLA-DR+-1 | 68.40%  | 3.80%   | 1.52 | 0.00E+00 |
| STAB1    | HLA-DR+-1 | 74.00%  | 5.70%   | 1.49 | 0.00E+00 |
| CTSB     | HLA-DR+-1 | 98.00%  | 79.60%  | 1.46 | 0.00E+00 |
| CD83     | HLA-DR+-1 | 80.80%  | 21.10%  | 1.42 | 0.00E+00 |
| CD163    | HLA-DR+-1 | 77.30%  | 3.30%   | 1.41 | 0.00E+00 |
| CYBA     | HLA-DR+-1 | 97.80%  | 76.00%  | 1.40 | 0.00E+00 |
| FCGR2A   | HLA-DR+-1 | 81.20%  | 6.80%   | 1.38 | 0.00E+00 |
| RGS1     | HLA-DR+-1 | 69.10%  | 11.70%  | 1.37 | 0.00E+00 |
| MSR1     | HLA-DR+-1 | 75.40%  | 3.10%   | 1.36 | 0.00E+00 |
| MS4A7    | HLA-DR+-1 | 73.90%  | 3.10%   | 1.34 | 0.00E+00 |
| FCGR3A   | HLA-DR+-1 | 54.80%  | 3.00%   | 1.30 | 0.00E+00 |
| CD68     | HLA-DR+-1 | 94.00%  | 57.80%  | 1.29 | 0.00E+00 |
| EMB      | HLA-DR+-1 | 68.30%  | 3.40%   | 1.28 | 0.00E+00 |
| CTSD     | HLA-DR+-1 | 93.90%  | 79.10%  | 1.26 | 0.00E+00 |
| GMFG     | HLA-DR+-1 | 79.00%  | 10.10%  | 1.24 | 0.00E+00 |
| FCGR2B   | HLA-DR+-1 | 66.60%  | 4.70%   | 1.23 | 0.00E+00 |
| MAFB     | HLA-DR+-1 | 84.90%  | 39.20%  | 1.23 | 0.00E+00 |
| HLA-DMB  | HLA-DR+-1 | 69.20%  | 5.70%   | 1.22 | 0.00E+00 |
| ACP5     | HLA-DR+-1 | 62.90%  | 6.90%   | 1.21 | 0.00E+00 |
| HLA-DQB1 | HLA-DR+-1 | 74.60%  | 10.50%  | 1.21 | 0.00E+00 |
| SPI1     | HLA-DR+-1 | 63.00%  | 2.80%   | 1.20 | 0.00E+00 |
| GPX1     | HLA-DR+-1 | 97.30%  | 82.60%  | 1.19 | 0.00E+00 |
| DUSP1    | HLA-DR+-1 | 84.20%  | 53.90%  | 1.17 | 0.00E+00 |
| MS4A4A   | HLA-DR+-1 | 62.40%  | 2.40%   | 1.16 | 0.00E+00 |
| FTH1     | HLA-DR+-1 | 100.00% | 100.00% | 1.15 | 0.00E+00 |
| SLC40A1  | HLA-DR+-1 | 55.20%  | 11.20%  | 1.15 | 0.00E+00 |
| LST1     | HLA-DR+-1 | 73.20%  | 5.60%   | 1.13 | 0.00E+00 |
| PLEK     | HLA-DR+-1 | 62.50%  | 6.30%   | 1.11 | 0.00E+00 |
| LILRB5   | HLA-DR+-1 | 62.60%  | 1.30%   | 1.10 | 0.00E+00 |
| S100A9   | HLA-DR+-1 | 41.50%  | 2.10%   | 1.09 | 0.00E+00 |
| ARHGDIB  | HLA-DR+-1 | 80.50%  | 15.60%  | 1.08 | 0.00E+00 |
| CSF1R    | HLA-DR+-1 | 61.50%  | 2.80%   | 1.08 | 0.00E+00 |
| ITGB2    | HLA-DR+-1 | 69.20%  | 5.40%   | 1.08 | 0.00E+00 |
| FPR3     | HLA-DR+-1 | 61.80%  | 2.60%   | 1.06 | 0.00E+00 |
| ARHGAP18 | HLA-DR+-1 | 69.60%  | 12.10%  | 1.06 | 0.00E+00 |
| YBX1     | HLA-DR+-1 | 94.50%  | 80.80%  | 1.06 | 0.00E+00 |
| CSTB     | HLA-DR+-1 | 93.00%  | 81.10%  | 1.04 | 0.00E+00 |
| CPVL     | HLA-DR+-1 | 66.40%  | 6.80%   | 1.04 | 0.00E+00 |

|          |          |         |        |      |          |
|----------|----------|---------|--------|------|----------|
| HLA-DQA1 | HLA-DR+1 | 59.70%  | 7.70%  | 1.04 | 0.00E+00 |
| BLVRB    | HLA-DR+1 | 79.00%  | 48.00% | 1.03 | 0.00E+00 |
| PYCARD   | HLA-DR+1 | 74.80%  | 26.90% | 1.01 | 0.00E+00 |
| NPC2     | HLA-DR+1 | 99.40%  | 91.50% | 0.99 | 0.00E+00 |
| SRGN     | HLA-DR+1 | 91.20%  | 39.30% | 0.99 | 0.00E+00 |
| GRN      | HLA-DR+1 | 92.90%  | 80.40% | 0.98 | 0.00E+00 |
| MAF      | HLA-DR+1 | 65.40%  | 24.40% | 0.96 | 0.00E+00 |
| ALDH1A1  | HLA-DR+1 | 48.50%  | 3.20%  | 0.96 | 0.00E+00 |
| C5AR1    | HLA-DR+1 | 58.00%  | 5.40%  | 0.95 | 0.00E+00 |
| HNMT     | HLA-DR+1 | 65.50%  | 17.60% | 0.94 | 0.00E+00 |
| HPGDS    | HLA-DR+1 | 51.40%  | 3.10%  | 0.93 | 0.00E+00 |
| FCGRT    | HLA-DR+1 | 93.50%  | 83.10% | 0.93 | 0.00E+00 |
| GPR34    | HLA-DR+1 | 49.00%  | 1.10%  | 0.93 | 0.00E+00 |
| CREG1    | HLA-DR+1 | 60.40%  | 16.40% | 0.90 | 0.00E+00 |
| CD37     | HLA-DR+1 | 60.70%  | 5.80%  | 0.89 | 0.00E+00 |
| DAB2     | HLA-DR+1 | 87.70%  | 70.90% | 0.88 | 0.00E+00 |
| ITGAM    | HLA-DR+1 | 54.10%  | 2.50%  | 0.88 | 0.00E+00 |
| ARRB2    | HLA-DR+1 | 60.00%  | 8.50%  | 0.88 | 0.00E+00 |
| DOK2     | HLA-DR+1 | 53.30%  | 3.10%  | 0.87 | 0.00E+00 |
| KCTD12   | HLA-DR+1 | 72.00%  | 32.60% | 0.87 | 0.00E+00 |
| C1orf162 | HLA-DR+1 | 51.10%  | 4.10%  | 0.87 | 0.00E+00 |
| C3AR1    | HLA-DR+1 | 53.40%  | 2.00%  | 0.86 | 0.00E+00 |
| RNF130   | HLA-DR+1 | 82.60%  | 55.40% | 0.86 | 0.00E+00 |
| ARPC3    | HLA-DR+1 | 95.80%  | 86.70% | 0.86 | 0.00E+00 |
| AP1S2    | HLA-DR+1 | 74.50%  | 36.70% | 0.84 | 0.00E+00 |
| CD53     | HLA-DR+1 | 60.00%  | 5.90%  | 0.84 | 0.00E+00 |
| RBM47    | HLA-DR+1 | 51.50%  | 3.90%  | 0.84 | 0.00E+00 |
| RGS10    | HLA-DR+1 | 79.70%  | 48.00% | 0.83 | 0.00E+00 |
| COTL1    | HLA-DR+1 | 58.60%  | 13.00% | 0.83 | 0.00E+00 |
| CD4      | HLA-DR+1 | 60.10%  | 11.70% | 0.83 | 0.00E+00 |
| RNASE6   | HLA-DR+1 | 50.10%  | 3.30%  | 0.82 | 0.00E+00 |
| EVI2B    | HLA-DR+1 | 52.40%  | 4.30%  | 0.82 | 0.00E+00 |
| MNDA     | HLA-DR+1 | 47.60%  | 2.40%  | 0.81 | 0.00E+00 |
| TMSB10   | HLA-DR+1 | 100.00% | 97.80% | 0.80 | 0.00E+00 |
| PTPRC    | HLA-DR+1 | 59.70%  | 5.90%  | 0.80 | 0.00E+00 |
| MPEG1    | HLA-DR+1 | 46.20%  | 1.60%  | 0.79 | 0.00E+00 |
| SLCO2B1  | HLA-DR+1 | 43.80%  | 1.70%  | 0.78 | 0.00E+00 |
| MFSD1    | HLA-DR+1 | 69.60%  | 34.60% | 0.78 | 0.00E+00 |
| FAM49B   | HLA-DR+1 | 59.70%  | 15.50% | 0.77 | 0.00E+00 |
| ADAP2    | HLA-DR+1 | 42.60%  | 1.80%  | 0.74 | 0.00E+00 |
| IGSF6    | HLA-DR+1 | 41.10%  | 1.90%  | 0.73 | 0.00E+00 |

|               |           |         |        |      |           |
|---------------|-----------|---------|--------|------|-----------|
| TREM2         | HLA-DR+-1 | 39.00%  | 0.80%  | 0.72 | 0.00E+00  |
| AP1B1         | HLA-DR+-1 | 53.20%  | 13.70% | 0.71 | 0.00E+00  |
| PEPD          | HLA-DR+-1 | 62.30%  | 40.80% | 0.70 | 0.00E+00  |
| CD84          | HLA-DR+-1 | 44.20%  | 2.00%  | 0.69 | 0.00E+00  |
| ATP6V0B       | HLA-DR+-1 | 88.10%  | 75.00% | 0.69 | 0.00E+00  |
| LILRB4        | HLA-DR+-1 | 42.50%  | 1.70%  | 0.66 | 0.00E+00  |
| NCF4          | HLA-DR+-1 | 42.20%  | 2.10%  | 0.68 | 1.04E-315 |
| LTC4S         | HLA-DR+-1 | 45.10%  | 3.60%  | 0.85 | 6.72E-315 |
| CTD-2337J16.1 | HLA-DR+-1 | 34.30%  | 0.50%  | 0.56 | 2.68E-314 |
| CEBPB         | HLA-DR+-1 | 68.60%  | 40.80% | 0.85 | 5.32E-314 |
| TGFBI         | HLA-DR+-1 | 96.50%  | 61.80% | 0.98 | 8.63E-313 |
| PFN1          | HLA-DR+-1 | 98.80%  | 95.70% | 0.71 | 1.45E-311 |
| FYB           | HLA-DR+-1 | 48.00%  | 3.80%  | 0.72 | 2.84E-310 |
| FRMD4B        | HLA-DR+-1 | 64.90%  | 23.80% | 0.85 | 5.69E-310 |
| LCP1          | HLA-DR+-1 | 51.80%  | 4.90%  | 0.79 | 2.63E-308 |
| HCK           | HLA-DR+-1 | 40.80%  | 1.90%  | 0.60 | 9.25E-305 |
| TMSB4X        | HLA-DR+-1 | 100.00% | 99.90% | 0.56 | 3.23E-304 |
| NCF2          | HLA-DR+-1 | 41.30%  | 1.90%  | 0.63 | 3.30E-304 |
| GNAI2         | HLA-DR+-1 | 79.20%  | 53.90% | 0.68 | 1.46E-303 |
| TBXAS1        | HLA-DR+-1 | 44.70%  | 3.10%  | 0.66 | 6.67E-303 |
| CLEC7A        | HLA-DR+-1 | 47.50%  | 3.70%  | 0.73 | 1.50E-300 |
| IL8           | HLA-DR+-1 | 82.50%  | 66.50% | 1.39 | 1.56E-294 |
| SNX2          | HLA-DR+-1 | 64.80%  | 43.20% | 0.64 | 1.14E-289 |
| LAMP1         | HLA-DR+-1 | 65.70%  | 42.40% | 0.66 | 1.82E-289 |
| HSPA1A        | HLA-DR+-1 | 77.40%  | 66.50% | 1.20 | 9.96E-283 |
| RBPJ          | HLA-DR+-1 | 85.60%  | 68.90% | 0.72 | 7.02E-280 |
| PILRA         | HLA-DR+-1 | 37.70%  | 1.90%  | 0.56 | 3.82E-279 |
| S100A11       | HLA-DR+-1 | 99.60%  | 98.70% | 0.67 | 3.10E-278 |
| ASAH1         | HLA-DR+-1 | 68.50%  | 49.80% | 0.65 | 4.13E-278 |
| IRF8          | HLA-DR+-1 | 49.00%  | 5.30%  | 0.71 | 5.71E-278 |
| PPT1          | HLA-DR+-1 | 71.70%  | 47.90% | 0.66 | 6.72E-277 |
| ATP5E         | HLA-DR+-1 | 99.40%  | 98.30% | 0.57 | 3.01E-272 |
| SNCA          | HLA-DR+-1 | 39.10%  | 2.30%  | 0.59 | 3.57E-271 |
| RP11-290F20.3 | HLA-DR+-1 | 32.00%  | 0.90%  | 0.54 | 3.33E-270 |
| RNASET2       | HLA-DR+-1 | 66.80%  | 28.20% | 0.78 | 1.48E-269 |
| ACTR2         | HLA-DR+-1 | 71.00%  | 49.40% | 0.60 | 8.19E-269 |
| TNFAIP3       | HLA-DR+-1 | 66.60%  | 26.00% | 1.15 | 7.16E-266 |
| HCST          | HLA-DR+-1 | 52.00%  | 6.80%  | 0.87 | 1.68E-264 |
| SLC7A7        | HLA-DR+-1 | 38.50%  | 2.70%  | 0.55 | 3.67E-264 |
| CAP1          | HLA-DR+-1 | 81.90%  | 69.00% | 0.60 | 4.27E-264 |

|         |           |         |         |      |           |
|---------|-----------|---------|---------|------|-----------|
| CORO1A  | HLA-DR+-1 | 48.70%  | 5.70%   | 0.70 | 6.47E-264 |
| HCLS1   | HLA-DR+-1 | 48.30%  | 6.30%   | 0.70 | 4.58E-263 |
| BLVRA   | HLA-DR+-1 | 53.10%  | 28.50%  | 0.59 | 2.46E-260 |
| TIMD4   | HLA-DR+-1 | 29.00%  | 0.60%   | 0.58 | 2.94E-256 |
| ATP6V1F | HLA-DR+-1 | 80.70%  | 75.00%  | 0.55 | 5.31E-256 |
| ME1     | HLA-DR+-1 | 37.50%  | 4.30%   | 0.60 | 4.46E-254 |
| CCR1    | HLA-DR+-1 | 31.00%  | 0.90%   | 0.50 | 9.33E-254 |
| MPP1    | HLA-DR+-1 | 46.10%  | 13.20%  | 0.59 | 3.26E-250 |
| UCP2    | HLA-DR+-1 | 53.90%  | 13.70%  | 0.74 | 1.03E-249 |
| CST3    | HLA-DR+-1 | 100.00% | 98.90%  | 0.79 | 3.42E-249 |
| SNX10   | HLA-DR+-1 | 40.00%  | 4.00%   | 0.66 | 4.78E-249 |
| IL18    | HLA-DR+-1 | 36.80%  | 2.20%   | 0.56 | 3.24E-247 |
| CCDC88A | HLA-DR+-1 | 56.40%  | 26.00%  | 0.66 | 6.09E-247 |
| IQGAP1  | HLA-DR+-1 | 80.60%  | 64.10%  | 0.58 | 3.28E-243 |
| SH3BGRL | HLA-DR+-1 | 86.70%  | 78.40%  | 0.57 | 9.97E-242 |
| MAMDC2  | HLA-DR+-1 | 71.00%  | 42.70%  | 0.73 | 1.87E-241 |
| B2M     | HLA-DR+-1 | 100.00% | 100.00% | 0.53 | 6.62E-241 |
| LY86    | HLA-DR+-1 | 35.70%  | 2.00%   | 0.55 | 9.64E-241 |
| ARPC5   | HLA-DR+-1 | 84.00%  | 73.50%  | 0.58 | 3.04E-240 |
| MT-CO1  | HLA-DR+-1 | 99.80%  | 99.50%  | 0.72 | 5.75E-240 |
| GPR183  | HLA-DR+-1 | 62.20%  | 16.10%  | 1.22 | 6.54E-240 |
| AP2A2   | HLA-DR+-1 | 48.40%  | 19.30%  | 0.58 | 2.03E-237 |
| TPM3    | HLA-DR+-1 | 87.70%  | 71.10%  | 0.64 | 1.10E-236 |
| TPP1    | HLA-DR+-1 | 57.70%  | 31.50%  | 0.58 | 1.58E-236 |
| HAVCR2  | HLA-DR+-1 | 37.70%  | 2.70%   | 0.57 | 8.07E-236 |
| RHOG    | HLA-DR+-1 | 66.90%  | 40.30%  | 0.64 | 3.85E-235 |
| RENBP   | HLA-DR+-1 | 35.80%  | 2.70%   | 0.55 | 5.43E-231 |
| CXCL3   | HLA-DR+-1 | 73.70%  | 52.00%  | 1.46 | 2.24E-230 |
| LAIR1   | HLA-DR+-1 | 32.10%  | 1.60%   | 0.49 | 3.14E-230 |
| TRA2B   | HLA-DR+-1 | 70.80%  | 60.30%  | 0.63 | 3.24E-230 |
| TALDO1  | HLA-DR+-1 | 72.80%  | 63.70%  | 0.51 | 3.93E-230 |
| ALDH2   | HLA-DR+-1 | 61.10%  | 37.80%  | 0.64 | 5.51E-230 |
| FERMT3  | HLA-DR+-1 | 44.50%  | 6.70%   | 0.59 | 1.26E-229 |
| CPM     | HLA-DR+-1 | 48.90%  | 7.60%   | 0.71 | 1.46E-229 |
| RAC1    | HLA-DR+-1 | 71.30%  | 54.70%  | 0.55 | 7.74E-229 |
| 43160   | HLA-DR+-1 | 30.70%  | 1.30%   | 0.51 | 2.97E-227 |
| GPSM3   | HLA-DR+-1 | 42.50%  | 4.90%   | 0.58 | 4.23E-227 |
| KLF6    | HLA-DR+-1 | 90.00%  | 79.40%  | 0.81 | 9.39E-227 |
| IFI30   | HLA-DR+-1 | 39.30%  | 4.00%   | 0.78 | 2.88E-224 |
| ACTB    | HLA-DR+-1 | 100.00% | 99.90%  | 0.61 | 9.73E-224 |
| MEF2C   | HLA-DR+-1 | 57.90%  | 18.50%  | 0.78 | 2.05E-223 |

|          |          |        |        |      |           |
|----------|----------|--------|--------|------|-----------|
| COLEC12  | HLA-DR+1 | 60.20% | 26.00% | 0.70 | 1.07E-222 |
| IQGAP2   | HLA-DR+1 | 35.30% | 2.40%  | 0.57 | 1.22E-222 |
| OAZ1     | HLA-DR+1 | 99.80% | 99.10% | 0.45 | 2.28E-222 |
| GLUL     | HLA-DR+1 | 89.00% | 74.90% | 0.68 | 3.22E-220 |
| SIGLEC1  | HLA-DR+1 | 26.00% | 0.70%  | 0.46 | 2.19E-216 |
| CLEC2B   | HLA-DR+1 | 56.20% | 12.80% | 0.73 | 5.43E-214 |
| TNS1     | HLA-DR+1 | 59.60% | 38.40% | 0.57 | 1.30E-212 |
| CYTH4    | HLA-DR+1 | 28.30% | 1.10%  | 0.49 | 4.53E-212 |
| SH2B3    | HLA-DR+1 | 47.00% | 11.40% | 0.61 | 1.70E-211 |
| LCP2     | HLA-DR+1 | 36.90% | 3.40%  | 0.53 | 2.59E-209 |
| ARHGAP30 | HLA-DR+1 | 34.00% | 2.80%  | 0.54 | 1.27E-208 |
| SCN9A    | HLA-DR+1 | 25.10% | 0.60%  | 0.45 | 3.01E-208 |
| FAM105A  | HLA-DR+1 | 36.10% | 3.80%  | 0.55 | 1.06E-207 |
| GATM     | HLA-DR+1 | 30.60% | 1.90%  | 0.48 | 1.48E-207 |
| TSPO     | HLA-DR+1 | 97.20% | 92.90% | 0.56 | 1.20E-206 |
| TCN2     | HLA-DR+1 | 41.30% | 15.90% | 0.52 | 2.96E-205 |
| BST2     | HLA-DR+1 | 70.30% | 24.30% | 0.71 | 5.57E-205 |
| HSPA1B   | HLA-DR+1 | 61.30% | 53.20% | 0.98 | 6.98E-205 |
| PIK3AP1  | HLA-DR+1 | 30.00% | 1.60%  | 0.45 | 1.42E-204 |
| BRI3     | HLA-DR+1 | 44.50% | 19.70% | 0.51 | 3.36E-204 |
| SNX6     | HLA-DR+1 | 58.70% | 45.50% | 0.50 | 1.09E-202 |
| GLIPR1   | HLA-DR+1 | 75.60% | 47.40% | 0.66 | 1.05E-200 |
| PTPN6    | HLA-DR+1 | 32.70% | 3.10%  | 0.51 | 4.37E-200 |
| LYN      | HLA-DR+1 | 38.30% | 7.30%  | 0.50 | 2.58E-197 |
| PABPC4   | HLA-DR+1 | 51.40% | 26.80% | 0.55 | 4.65E-197 |
| LY96     | HLA-DR+1 | 55.00% | 34.80% | 0.52 | 1.34E-196 |
| SYNGR2   | HLA-DR+1 | 48.70% | 15.90% | 0.59 | 1.00E-195 |
| CTSC     | HLA-DR+1 | 48.60% | 10.90% | 0.68 | 2.40E-193 |
| PNRC1    | HLA-DR+1 | 75.40% | 56.10% | 0.71 | 1.23E-191 |
| PLEC     | HLA-DR+1 | 61.70% | 42.40% | 0.56 | 1.06E-190 |
| CCL3L1   | HLA-DR+1 | 34.50% | 3.60%  | 1.18 | 1.16E-189 |
| GNAS     | HLA-DR+1 | 82.90% | 74.30% | 0.51 | 2.19E-189 |
| LILRB2   | HLA-DR+1 | 28.80% | 1.60%  | 0.43 | 2.81E-189 |
| SLC43A2  | HLA-DR+1 | 40.70% | 10.20% | 0.55 | 1.48E-188 |
| LGALS9   | HLA-DR+1 | 36.30% | 5.00%  | 0.51 | 1.99E-188 |
| KIAA1598 | HLA-DR+1 | 34.70% | 5.70%  | 0.51 | 5.81E-188 |
| CD86     | HLA-DR+1 | 33.20% | 2.90%  | 0.46 | 5.93E-186 |
| SYK      | HLA-DR+1 | 27.20% | 1.50%  | 0.43 | 3.60E-184 |
| STXBP2   | HLA-DR+1 | 30.70% | 2.30%  | 0.43 | 1.49E-183 |
| CPEB4    | HLA-DR+1 | 54.80% | 32.50% | 0.56 | 3.72E-183 |
| VMO1     | HLA-DR+1 | 31.50% | 2.60%  | 0.55 | 2.40E-181 |

|          |          |        |        |      |           |
|----------|----------|--------|--------|------|-----------|
| SAMHD1   | HLA-DR+1 | 55.70% | 23.30% | 0.62 | 3.14E-180 |
| GAS7     | HLA-DR+1 | 45.20% | 15.80% | 0.53 | 3.55E-180 |
| PDK4     | HLA-DR+1 | 50.70% | 25.40% | 0.89 | 4.55E-180 |
| C4orf48  | HLA-DR+1 | 33.50% | 6.00%  | 0.56 | 5.07E-180 |
| PLIN2    | HLA-DR+1 | 50.80% | 29.00% | 0.80 | 5.86E-180 |
| PELI1    | HLA-DR+1 | 44.60% | 25.40% | 0.61 | 1.36E-179 |
| RASGEF1B | HLA-DR+1 | 51.90% | 19.80% | 0.72 | 8.01E-179 |
| MYO5A    | HLA-DR+1 | 36.40% | 12.60% | 0.48 | 1.17E-178 |
| RCSD1    | HLA-DR+1 | 29.90% | 2.30%  | 0.46 | 3.79E-178 |
| LHFPL2   | HLA-DR+1 | 47.40% | 25.80% | 0.50 | 5.01E-178 |
| MERTK    | HLA-DR+1 | 24.20% | 1.30%  | 0.39 | 9.97E-178 |
| GNAQ     | HLA-DR+1 | 48.90% | 27.20% | 0.50 | 1.31E-177 |
| MCOLN1   | HLA-DR+1 | 39.30% | 17.70% | 0.47 | 1.13E-175 |
| GNA15    | HLA-DR+1 | 33.40% | 3.30%  | 0.44 | 2.34E-175 |
| FUCA1    | HLA-DR+1 | 33.20% | 19.10% | 0.42 | 2.99E-173 |
| SELPLG   | HLA-DR+1 | 27.40% | 2.20%  | 0.43 | 6.04E-173 |
| CXCR4    | HLA-DR+1 | 40.20% | 8.90%  | 0.33 | 1.19E-171 |
| DOCK2    | HLA-DR+1 | 26.00% | 1.50%  | 0.39 | 4.09E-171 |
| PLAUR    | HLA-DR+1 | 72.20% | 58.90% | 0.84 | 5.41E-171 |
| UNC93B1  | HLA-DR+1 | 35.80% | 10.60% | 0.48 | 6.56E-171 |
| TNFAIP2  | HLA-DR+1 | 71.20% | 48.80% | 0.66 | 6.65E-171 |
| NPL      | HLA-DR+1 | 25.60% | 2.20%  | 0.37 | 9.69E-171 |
| NINJ1    | HLA-DR+1 | 62.10% | 35.70% | 0.66 | 3.15E-170 |
| FLNA     | HLA-DR+1 | 74.30% | 56.20% | 0.58 | 3.75E-170 |
| IL10RA   | HLA-DR+1 | 33.50% | 3.70%  | 0.47 | 1.37E-169 |
| IL1B     | HLA-DR+1 | 52.00% | 21.60% | 1.32 | 1.79E-169 |
| ARHGAP4  | HLA-DR+1 | 27.80% | 2.20%  | 0.43 | 1.63E-168 |
| RAB5C    | HLA-DR+1 | 71.90% | 66.10% | 0.42 | 2.87E-168 |
| HLA-DQA2 | HLA-DR+1 | 35.20% | 5.00%  | 0.60 | 7.79E-168 |
| P2RY14   | HLA-DR+1 | 23.50% | 1.10%  | 0.53 | 1.32E-167 |
| DAZAP2   | HLA-DR+1 | 65.00% | 54.50% | 0.44 | 3.64E-167 |
| MT-ND2   | HLA-DR+1 | 99.80% | 99.50% | 0.54 | 1.07E-164 |
| CFLAR    | HLA-DR+1 | 59.30% | 37.70% | 0.65 | 5.21E-164 |
| OTUD1    | HLA-DR+1 | 31.10% | 6.00%  | 0.50 | 7.95E-163 |
| SPRED1   | HLA-DR+1 | 39.60% | 19.10% | 0.44 | 8.84E-163 |
| CAPZA2   | HLA-DR+1 | 77.20% | 71.10% | 0.43 | 4.32E-162 |
| SKAP2    | HLA-DR+1 | 38.80% | 7.50%  | 0.52 | 5.32E-162 |
| BMP2K    | HLA-DR+1 | 33.90% | 8.20%  | 0.46 | 5.62E-162 |
| NCKAP1L  | HLA-DR+1 | 23.60% | 1.20%  | 0.37 | 7.52E-162 |
| SLC11A1  | HLA-DR+1 | 24.60% | 1.80%  | 0.38 | 9.98E-162 |
| ALOX5    | HLA-DR+1 | 25.90% | 1.60%  | 0.38 | 1.01E-161 |

|               |          |        |        |      |           |
|---------------|----------|--------|--------|------|-----------|
| RAP1A         | HLA-DR+1 | 71.20% | 62.30% | 0.43 | 2.49E-161 |
| PLXNB2        | HLA-DR+1 | 36.60% | 15.00% | 0.44 | 4.07E-161 |
| CSF2RA        | HLA-DR+1 | 29.70% | 3.20%  | 0.38 | 5.44E-161 |
| SLA           | HLA-DR+1 | 26.70% | 2.00%  | 0.40 | 9.17E-161 |
| AP2S1         | HLA-DR+1 | 70.90% | 67.60% | 0.40 | 1.03E-160 |
| BTK           | HLA-DR+1 | 26.20% | 1.70%  | 0.40 | 1.46E-160 |
| CCL18         | HLA-DR+1 | 20.90% | 0.90%  | 0.79 | 1.53E-160 |
| PIK3R5        | HLA-DR+1 | 26.70% | 1.90%  | 0.38 | 2.01E-160 |
| FGL2          | HLA-DR+1 | 59.30% | 22.60% | 0.69 | 7.57E-160 |
| RGS19         | HLA-DR+1 | 33.60% | 7.20%  | 0.44 | 4.15E-159 |
| PLXND1        | HLA-DR+1 | 37.40% | 8.20%  | 0.49 | 4.96E-159 |
| CAPG          | HLA-DR+1 | 82.90% | 61.40% | 0.65 | 1.75E-158 |
| EVI2A         | HLA-DR+1 | 43.70% | 12.50% | 0.59 | 3.32E-158 |
| CSTA          | HLA-DR+1 | 34.20% | 4.60%  | 0.50 | 5.42E-158 |
| MTRNR2L1      | HLA-DR+1 | 49.80% | 17.30% | 1.13 | 6.08E-157 |
| RP11-1143G9.4 | HLA-DR+1 | 27.80% | 2.40%  | 0.46 | 1.30E-156 |
| SPINT2        | HLA-DR+1 | 32.60% | 3.80%  | 0.43 | 2.31E-156 |
| FABP5         | HLA-DR+1 | 55.00% | 18.70% | 0.79 | 2.32E-156 |
| CECR1         | HLA-DR+1 | 33.10% | 6.30%  | 0.47 | 4.72E-154 |
| WAS           | HLA-DR+1 | 26.00% | 1.90%  | 0.38 | 7.41E-154 |
| MT-ND1        | HLA-DR+1 | 99.70% | 99.10% | 0.54 | 8.09E-153 |
| TFRC          | HLA-DR+1 | 33.70% | 13.60% | 0.47 | 2.80E-152 |
| DUSP6         | HLA-DR+1 | 47.80% | 15.40% | 0.66 | 2.91E-152 |
| EMILIN2       | HLA-DR+1 | 30.00% | 4.00%  | 0.45 | 4.02E-152 |
| ZEB2          | HLA-DR+1 | 66.10% | 48.10% | 0.51 | 4.28E-152 |
| PSTPIP1       | HLA-DR+1 | 24.70% | 1.70%  | 0.36 | 1.11E-151 |
| TFEC          | HLA-DR+1 | 23.80% | 1.40%  | 0.36 | 3.22E-151 |
| VASP          | HLA-DR+1 | 58.20% | 31.60% | 0.54 | 6.60E-151 |
| QKI           | HLA-DR+1 | 53.70% | 37.60% | 0.45 | 1.52E-150 |
| LRRFIP1       | HLA-DR+1 | 81.60% | 62.80% | 0.57 | 1.53E-148 |
| TM6SF1        | HLA-DR+1 | 25.20% | 1.80%  | 0.36 | 1.78E-148 |
| ATP2B1        | HLA-DR+1 | 66.80% | 48.20% | 0.57 | 7.00E-148 |
| PDXK          | HLA-DR+1 | 33.50% | 12.70% | 0.41 | 1.11E-147 |
| GABRB2        | HLA-DR+1 | 17.10% | 0.30%  | 0.31 | 3.52E-147 |
| PTAFR         | HLA-DR+1 | 23.30% | 1.40%  | 0.35 | 5.91E-147 |
| RB1           | HLA-DR+1 | 38.40% | 18.30% | 0.46 | 7.34E-147 |
| DSC2          | HLA-DR+1 | 19.30% | 0.60%  | 0.31 | 1.44E-146 |
| SLC15A3       | HLA-DR+1 | 27.50% | 3.60%  | 0.36 | 1.18E-145 |
| MAN1A1        | HLA-DR+1 | 49.70% | 42.90% | 0.39 | 1.48E-142 |
| KLF4          | HLA-DR+1 | 76.40% | 71.00% | 0.62 | 2.02E-141 |
| KIF1B         | HLA-DR+1 | 43.60% | 30.90% | 0.39 | 2.59E-141 |



|           |          |         |        |      |           |
|-----------|----------|---------|--------|------|-----------|
| CD33      | HLA-DR+1 | 23.50%  | 1.60%  | 0.34 | 4.29E-141 |
| MARCKS    | HLA-DR+1 | 50.80%  | 27.70% | 0.63 | 8.66E-140 |
| CTSH      | HLA-DR+1 | 57.40%  | 20.60% | 0.55 | 3.23E-139 |
| GRB2      | HLA-DR+1 | 55.70%  | 38.70% | 0.44 | 4.51E-138 |
| NCOA4     | HLA-DR+1 | 51.20%  | 31.90% | 0.42 | 4.53E-138 |
| CLEC12A   | HLA-DR+1 | 32.40%  | 7.60%  | 0.47 | 4.66E-138 |
| TXNIP     | HLA-DR+1 | 64.80%  | 42.10% | 0.83 | 6.42E-138 |
| GAS6      | HLA-DR+1 | 46.70%  | 17.70% | 0.60 | 6.56E-138 |
| SPP1      | HLA-DR+1 | 14.20%  | 9.20%  | 1.58 | 1.07E-137 |
| DPEP2     | HLA-DR+1 | 19.60%  | 0.90%  | 0.32 | 1.35E-137 |
| JUND      | HLA-DR+1 | 66.90%  | 58.90% | 0.45 | 1.37E-137 |
| OSTF1     | HLA-DR+1 | 49.60%  | 34.30% | 0.40 | 2.61E-136 |
| THEMIS2   | HLA-DR+1 | 28.10%  | 7.70%  | 0.38 | 7.44E-136 |
| LINC01094 | HLA-DR+1 | 17.00%  | 0.50%  | 0.29 | 4.37E-134 |
| FAM96A    | HLA-DR+1 | 39.50%  | 24.00% | 0.38 | 6.44E-134 |
| LRRC25    | HLA-DR+1 | 17.90%  | 0.50%  | 0.28 | 4.42E-133 |
| CXCL16    | HLA-DR+1 | 48.80%  | 20.50% | 0.54 | 4.90E-133 |
| ARPC4     | HLA-DR+1 | 64.80%  | 60.00% | 0.38 | 1.16E-132 |
| RASSF4    | HLA-DR+1 | 28.80%  | 4.60%  | 0.40 | 2.14E-132 |
| TRMT1     | HLA-DR+1 | 33.40%  | 15.00% | 0.40 | 2.82E-132 |
| CARD16    | HLA-DR+1 | 30.90%  | 4.90%  | 0.42 | 3.21E-132 |
| CITED2    | HLA-DR+1 | 37.00%  | 22.00% | 0.47 | 1.54E-131 |
| MTSS1     | HLA-DR+1 | 37.20%  | 14.30% | 0.45 | 1.74E-131 |
| RNF150    | HLA-DR+1 | 16.50%  | 0.40%  | 0.28 | 3.96E-131 |
| CLTC      | HLA-DR+1 | 50.80%  | 38.30% | 0.38 | 5.31E-131 |
| RAB31     | HLA-DR+1 | 68.20%  | 51.40% | 0.49 | 7.45E-131 |
| RGL1      | HLA-DR+1 | 28.90%  | 8.50%  | 0.41 | 1.30E-130 |
| MGAT4A    | HLA-DR+1 | 26.90%  | 3.80%  | 0.40 | 8.98E-130 |
| TMEM37    | HLA-DR+1 | 18.30%  | 0.80%  | 0.28 | 4.44E-129 |
| COMT      | HLA-DR+1 | 83.40%  | 76.90% | 0.43 | 5.18E-129 |
| S100A6    | HLA-DR+1 | 100.00% | 99.90% | 0.51 | 2.28E-128 |
| NUP214    | HLA-DR+1 | 31.30%  | 9.30%  | 0.41 | 2.74E-128 |
| GNB2      | HLA-DR+1 | 58.90%  | 46.10% | 0.38 | 3.16E-128 |
| FBP1      | HLA-DR+1 | 23.30%  | 2.80%  | 0.39 | 3.19E-128 |
| MT-CO2    | HLA-DR+1 | 99.80%  | 99.30% | 0.50 | 7.90E-127 |
| CYTIP     | HLA-DR+1 | 28.10%  | 4.70%  | 0.33 | 8.30E-127 |
| FAM26F    | HLA-DR+1 | 22.90%  | 2.20%  | 0.35 | 1.12E-126 |
| LAMTOR2   | HLA-DR+1 | 57.20%  | 52.40% | 0.32 | 4.00E-126 |
| DBI       | HLA-DR+1 | 85.20%  | 83.80% | 0.42 | 4.73E-126 |
| HMHA1     | HLA-DR+1 | 25.10%  | 2.70%  | 0.38 | 1.60E-125 |
| PET100    | HLA-DR+1 | 65.10%  | 62.20% | 0.34 | 7.71E-125 |

|          |          |         |        |      |           |
|----------|----------|---------|--------|------|-----------|
| MT-ND3   | HLA-DR+1 | 99.70%  | 98.90% | 0.48 | 8.12E-125 |
| MOB1A    | HLA-DR+1 | 51.30%  | 41.20% | 0.37 | 4.68E-124 |
| A2M      | HLA-DR+1 | 52.80%  | 19.60% | 0.45 | 5.46E-124 |
| ETS2     | HLA-DR+1 | 57.50%  | 29.60% | 0.62 | 1.50E-123 |
| GPR137B  | HLA-DR+1 | 30.80%  | 7.30%  | 0.40 | 2.29E-123 |
| VOPP1    | HLA-DR+1 | 38.30%  | 20.70% | 0.39 | 9.17E-123 |
| PRR13    | HLA-DR+1 | 53.20%  | 43.00% | 0.36 | 2.57E-122 |
| COLGALT1 | HLA-DR+1 | 33.30%  | 12.80% | 0.39 | 1.25E-121 |
| CNPY3    | HLA-DR+1 | 38.30%  | 24.70% | 0.36 | 1.62E-121 |
| IER5     | HLA-DR+1 | 36.40%  | 16.00% | 0.46 | 2.94E-121 |
| S100A4   | HLA-DR+1 | 100.00% | 99.40% | 0.42 | 3.79E-121 |
| RALGDS   | HLA-DR+1 | 36.50%  | 11.40% | 0.45 | 5.53E-121 |
| NEU1     | HLA-DR+1 | 55.80%  | 50.40% | 0.39 | 1.41E-120 |
| FMNL1    | HLA-DR+1 | 31.60%  | 7.90%  | 0.39 | 1.54E-119 |
| LIPA     | HLA-DR+1 | 40.00%  | 22.70% | 0.41 | 1.75E-119 |
| CORO1C   | HLA-DR+1 | 44.50%  | 28.10% | 0.40 | 4.06E-119 |
| TKT      | HLA-DR+1 | 63.70%  | 53.90% | 0.39 | 6.08E-119 |
| PDGFB    | HLA-DR+1 | 24.50%  | 2.80%  | 0.38 | 6.25E-119 |
| BAX      | HLA-DR+1 | 53.10%  | 41.00% | 0.38 | 1.71E-118 |
| S100A8   | HLA-DR+1 | 17.70%  | 2.00%  | 1.00 | 3.36E-118 |
| SH3BP2   | HLA-DR+1 | 28.80%  | 6.50%  | 0.37 | 5.00E-118 |
| GIMAP4   | HLA-DR+1 | 26.50%  | 3.60%  | 0.38 | 6.36E-118 |
| KCNQ1    | HLA-DR+1 | 17.00%  | 0.80%  | 0.26 | 2.60E-117 |
| DUSP2    | HLA-DR+1 | 27.00%  | 4.00%  | 0.44 | 8.76E-117 |
| TTYH3    | HLA-DR+1 | 24.40%  | 5.60%  | 0.34 | 2.21E-115 |
| KYNU     | HLA-DR+1 | 41.30%  | 11.70% | 0.51 | 3.37E-115 |
| CD300A   | HLA-DR+1 | 20.30%  | 1.50%  | 0.29 | 1.70E-114 |
| BCL2A1   | HLA-DR+1 | 37.70%  | 10.50% | 0.91 | 2.73E-114 |
| PDE4DIP  | HLA-DR+1 | 60.40%  | 55.90% | 0.38 | 1.36E-113 |
| CYFIP1   | HLA-DR+1 | 37.60%  | 22.50% | 0.36 | 4.19E-113 |
| POU2F2   | HLA-DR+1 | 26.10%  | 5.50%  | 0.40 | 2.03E-112 |
| MYO1G    | HLA-DR+1 | 24.30%  | 2.80%  | 0.34 | 1.05E-111 |
| CXCL2    | HLA-DR+1 | 72.50%  | 58.70% | 0.93 | 9.27E-111 |
| CMTM6    | HLA-DR+1 | 57.60%  | 43.00% | 0.41 | 1.29E-110 |
| HSPA6    | HLA-DR+1 | 27.80%  | 4.50%  | 0.74 | 1.45E-109 |
| H2AFY    | HLA-DR+1 | 50.40%  | 43.90% | 0.32 | 2.06E-109 |
| SIRPA    | HLA-DR+1 | 34.60%  | 14.80% | 0.38 | 2.62E-109 |
| PSAP     | HLA-DR+1 | 99.20%  | 98.30% | 0.44 | 2.84E-109 |
| FPR1     | HLA-DR+1 | 18.00%  | 1.10%  | 0.26 | 6.41E-109 |
| NAGA     | HLA-DR+1 | 32.40%  | 15.00% | 0.34 | 1.40E-108 |
| TTC7A    | HLA-DR+1 | 24.30%  | 6.00%  | 0.34 | 1.79E-108 |

|           |           |        |        |      |           |
|-----------|-----------|--------|--------|------|-----------|
| NFKBIA    | HLA-DR+-1 | 92.50% | 92.40% | 0.61 | 2.53E-108 |
| CHCHD10   | HLA-DR+-1 | 30.30% | 7.30%  | 0.44 | 3.00E-108 |
| PLD3      | HLA-DR+-1 | 76.20% | 79.80% | 0.36 | 3.65E-108 |
| NR4A2     | HLA-DR+-1 | 66.80% | 54.50% | 0.62 | 7.95E-108 |
| LAMTOR4   | HLA-DR+-1 | 84.40% | 83.20% | 0.34 | 9.43E-108 |
| KLF2      | HLA-DR+-1 | 36.30% | 14.80% | 0.49 | 9.85E-108 |
| ADAM17    | HLA-DR+-1 | 43.40% | 27.20% | 0.42 | 1.52E-107 |
| HPGD      | HLA-DR+-1 | 22.20% | 2.70%  | 0.33 | 5.89E-107 |
| AHNAK     | HLA-DR+-1 | 90.80% | 90.30% | 0.40 | 9.80E-107 |
| CD36      | HLA-DR+-1 | 25.80% | 3.80%  | 0.49 | 2.22E-106 |
| CCL3L3    | HLA-DR+-1 | 19.50% | 1.50%  | 0.55 | 3.75E-106 |
| RAB11FIP1 | HLA-DR+-1 | 24.30% | 3.50%  | 0.34 | 4.14E-106 |
| PLEKHO1   | HLA-DR+-1 | 32.80% | 11.60% | 0.38 | 5.29E-106 |
| TYMP      | HLA-DR+-1 | 45.90% | 33.00% | 0.49 | 7.30E-106 |
| FGR       | HLA-DR+-1 | 25.30% | 4.90%  | 0.37 | 1.13E-105 |
| PARVB     | HLA-DR+-1 | 36.60% | 21.40% | 0.35 | 1.50E-105 |
| PTPN18    | HLA-DR+-1 | 29.20% | 12.90% | 0.34 | 1.60E-105 |
| SMAP2     | HLA-DR+-1 | 33.30% | 9.90%  | 0.42 | 3.11E-105 |
| ST3GAL6   | HLA-DR+-1 | 23.10% | 3.20%  | 0.33 | 1.98E-104 |
| GLUD1     | HLA-DR+-1 | 50.00% | 33.50% | 0.42 | 3.36E-104 |
| CD302     | HLA-DR+-1 | 38.90% | 21.50% | 0.40 | 4.04E-104 |
| SGMS2     | HLA-DR+-1 | 29.40% | 17.10% | 0.32 | 4.56E-104 |
| GSTO1     | HLA-DR+-1 | 73.70% | 69.80% | 0.37 | 6.93E-104 |
| EIF4E     | HLA-DR+-1 | 59.60% | 61.30% | 0.42 | 8.93E-104 |
| ZYX       | HLA-DR+-1 | 42.70% | 25.70% | 0.38 | 3.23E-103 |
| HSPH1     | HLA-DR+-1 | 50.90% | 50.70% | 0.36 | 3.73E-103 |
| RASSF2    | HLA-DR+-1 | 22.20% | 3.30%  | 0.33 | 1.83E-102 |
| ARL8A     | HLA-DR+-1 | 25.10% | 13.20% | 0.29 | 5.88E-102 |
| AES       | HLA-DR+-1 | 46.70% | 34.40% | 0.36 | 1.23E-101 |
| BIN2      | HLA-DR+-1 | 19.40% | 1.90%  | 0.25 | 1.29E-101 |
| NLRP3     | HLA-DR+-1 | 23.70% | 3.20%  | 0.38 | 4.32E-101 |
| SNHG12    | HLA-DR+-1 | 35.80% | 25.70% | 0.41 | 2.93E-100 |
| IRF5      | HLA-DR+-1 | 15.30% | 0.80%  | 0.26 | 1.42E-99  |
| CDC42     | HLA-DR+-1 | 86.50% | 77.20% | 0.42 | 5.73E-99  |
| FCGBP     | HLA-DR+-1 | 12.00% | 0.30%  | 0.38 | 1.74E-98  |
| STK17B    | HLA-DR+-1 | 41.20% | 14.90% | 0.47 | 2.81E-98  |
| INPP5D    | HLA-DR+-1 | 16.60% | 1.10%  | 0.26 | 4.46E-98  |
| IL1A      | HLA-DR+-1 | 22.80% | 2.90%  | 0.46 | 5.06E-98  |
| RNF13     | HLA-DR+-1 | 59.20% | 55.00% | 0.33 | 8.22E-98  |
| MTRNR2L2  | HLA-DR+-1 | 85.30% | 80.20% | 0.76 | 1.54E-97  |
| TAGLN2    | HLA-DR+-1 | 97.80% | 96.00% | 0.39 | 1.63E-97  |

|               |          |        |        |      |          |
|---------------|----------|--------|--------|------|----------|
| NAGK          | HLA-DR+1 | 43.40% | 35.80% | 0.29 | 4.78E-97 |
| PCBP1         | HLA-DR+1 | 69.60% | 65.40% | 0.32 | 1.02E-96 |
| SCAMP2        | HLA-DR+1 | 37.40% | 33.60% | 0.25 | 1.74E-96 |
| PLEKHO2       | HLA-DR+1 | 31.90% | 13.40% | 0.34 | 3.23E-96 |
| SMIM4         | HLA-DR+1 | 43.50% | 33.10% | 0.32 | 1.56E-95 |
| EFHD2         | HLA-DR+1 | 39.30% | 25.60% | 0.34 | 2.04E-95 |
| TNFRSF1B      | HLA-DR+1 | 31.90% | 8.00%  | 0.34 | 2.71E-95 |
| RHOA          | HLA-DR+1 | 94.50% | 94.20% | 0.35 | 3.72E-95 |
| PARVG         | HLA-DR+1 | 16.90% | 1.20%  | 0.25 | 6.32E-95 |
| WDR26         | HLA-DR+1 | 35.10% | 20.60% | 0.32 | 6.46E-95 |
| DSE           | HLA-DR+1 | 42.30% | 22.60% | 0.43 | 8.58E-95 |
| ATP6V0D1      | HLA-DR+1 | 56.70% | 52.90% | 0.31 | 8.75E-95 |
| DNAJB1        | HLA-DR+1 | 76.50% | 83.20% | 0.49 | 1.63E-94 |
| MGAT1         | HLA-DR+1 | 65.20% | 62.80% | 0.31 | 2.91E-94 |
| GNS           | HLA-DR+1 | 34.50% | 20.40% | 0.33 | 3.72E-94 |
| SPG21         | HLA-DR+1 | 40.30% | 27.20% | 0.32 | 6.99E-93 |
| GAA           | HLA-DR+1 | 48.20% | 36.80% | 0.34 | 7.24E-93 |
| HLA-B         | HLA-DR+1 | 99.00% | 98.10% | 0.28 | 8.92E-93 |
| SGK1          | HLA-DR+1 | 81.50% | 72.90% | 0.53 | 2.02E-92 |
| MYO1F         | HLA-DR+1 | 19.00% | 2.20%  | 0.28 | 7.11E-92 |
| B3GNT5        | HLA-DR+1 | 25.60% | 5.50%  | 0.37 | 7.20E-92 |
| SQRDL         | HLA-DR+1 | 39.80% | 28.70% | 0.31 | 9.94E-92 |
| ADORA3        | HLA-DR+1 | 13.70% | 0.80%  | 0.31 | 1.93E-91 |
| ABCC3         | HLA-DR+1 | 17.80% | 1.90%  | 0.25 | 3.58E-91 |
| PABPC1        | HLA-DR+1 | 96.10% | 92.70% | 0.39 | 8.69E-91 |
| RP11-701P16.5 | HLA-DR+1 | 17.90% | 1.60%  | 0.45 | 9.61E-91 |
| ABCA1         | HLA-DR+1 | 35.90% | 16.40% | 0.41 | 2.02E-90 |
| ADRBK1        | HLA-DR+1 | 22.20% | 6.70%  | 0.29 | 2.71E-90 |
| NISCH         | HLA-DR+1 | 27.80% | 11.80% | 0.33 | 5.99E-90 |
| LAT2          | HLA-DR+1 | 22.50% | 3.30%  | 0.31 | 1.43E-89 |
| SLC8A1        | HLA-DR+1 | 22.80% | 5.00%  | 0.32 | 1.51E-89 |
| IDH1          | HLA-DR+1 | 30.70% | 15.00% | 0.31 | 2.83E-88 |
| B3GNT7        | HLA-DR+1 | 18.10% | 2.60%  | 0.29 | 2.99E-88 |
| NFKB1         | HLA-DR+1 | 44.80% | 33.50% | 0.47 | 4.72E-88 |
| SORL1         | HLA-DR+1 | 19.50% | 2.20%  | 0.28 | 5.08E-88 |
| EMP3          | HLA-DR+1 | 98.50% | 94.10% | 0.42 | 1.07E-87 |
| VPS29         | HLA-DR+1 | 62.60% | 62.80% | 0.27 | 1.19E-87 |
| ZFP36L2       | HLA-DR+1 | 68.70% | 56.70% | 0.47 | 1.50E-87 |
| USF2          | HLA-DR+1 | 31.90% | 18.10% | 0.30 | 3.01E-87 |
| DAPK1         | HLA-DR+1 | 21.20% | 4.50%  | 0.29 | 3.18E-87 |
| CALM3         | HLA-DR+1 | 49.50% | 49.20% | 0.27 | 3.21E-87 |

|           |           |        |        |      |          |
|-----------|-----------|--------|--------|------|----------|
| IL6R      | HLA-DR+-1 | 31.40% | 15.30% | 0.33 | 3.37E-87 |
| MCL1      | HLA-DR+-1 | 78.50% | 71.00% | 0.42 | 5.16E-87 |
| MBNL1     | HLA-DR+-1 | 60.80% | 51.30% | 0.36 | 5.83E-87 |
| DUSP23    | HLA-DR+-1 | 46.20% | 35.00% | 0.35 | 1.23E-86 |
| YWHAH     | HLA-DR+-1 | 41.10% | 31.60% | 0.33 | 1.27E-86 |
| TLR2      | HLA-DR+-1 | 23.20% | 5.60%  | 0.33 | 2.03E-86 |
| DRAM2     | HLA-DR+-1 | 37.40% | 30.00% | 0.28 | 2.19E-86 |
| CSK       | HLA-DR+-1 | 22.30% | 8.50%  | 0.29 | 2.46E-86 |
| ARPC2     | HLA-DR+-1 | 91.70% | 91.70% | 0.34 | 4.73E-86 |
| OLR1      | HLA-DR+-1 | 21.00% | 3.10%  | 0.36 | 4.77E-86 |
| CCL4L2    | HLA-DR+-1 | 14.20% | 0.90%  | 0.28 | 6.86E-86 |
| HPCAL1    | HLA-DR+-1 | 25.50% | 7.60%  | 0.33 | 1.18E-85 |
| TWF2      | HLA-DR+-1 | 46.80% | 38.20% | 0.28 | 1.78E-85 |
| RIN3      | HLA-DR+-1 | 21.90% | 4.20%  | 0.30 | 3.24E-85 |
| MKNK1     | HLA-DR+-1 | 31.20% | 16.70% | 0.31 | 4.21E-85 |
| LPXN      | HLA-DR+-1 | 30.30% | 7.60%  | 0.34 | 4.86E-85 |
| SAT1      | HLA-DR+-1 | 98.20% | 95.10% | 0.44 | 5.59E-85 |
| MTRNR2L12 | HLA-DR+-1 | 72.00% | 65.00% | 0.53 | 5.61E-85 |
| GNB1      | HLA-DR+-1 | 50.40% | 43.20% | 0.29 | 8.02E-85 |
| RNF149    | HLA-DR+-1 | 41.10% | 28.90% | 0.33 | 9.49E-85 |
| IL10      | HLA-DR+-1 | 23.10% | 4.30%  | 0.38 | 1.46E-84 |
| ADCY7     | HLA-DR+-1 | 24.90% | 12.30% | 0.29 | 2.50E-84 |
| IL1RN     | HLA-DR+-1 | 21.80% | 3.50%  | 0.55 | 5.49E-84 |
| GLRX      | HLA-DR+-1 | 72.80% | 64.10% | 0.53 | 5.93E-84 |
| TMEM123   | HLA-DR+-1 | 55.60% | 42.80% | 0.37 | 3.34E-83 |
| LACTB     | HLA-DR+-1 | 35.10% | 17.40% | 0.35 | 7.63E-83 |
| MT-CO3    | HLA-DR+-1 | 99.60% | 99.50% | 0.41 | 1.31E-82 |
| SLC38A2   | HLA-DR+-1 | 79.60% | 77.40% | 0.37 | 2.77E-82 |
| C10orf118 | HLA-DR+-1 | 39.60% | 36.90% | 0.29 | 3.57E-82 |
| TAGAP     | HLA-DR+-1 | 18.80% | 2.40%  | 0.29 | 4.86E-82 |
| METRNL    | HLA-DR+-1 | 35.10% | 23.70% | 0.30 | 8.15E-82 |
| DMXL2     | HLA-DR+-1 | 21.00% | 5.70%  | 0.26 | 2.07E-81 |
| SMS       | HLA-DR+-1 | 47.40% | 37.50% | 0.34 | 3.66E-81 |
| SLC6A6    | HLA-DR+-1 | 38.00% | 23.30% | 0.34 | 3.95E-81 |
| TAOK3     | HLA-DR+-1 | 43.70% | 35.40% | 0.30 | 4.17E-81 |
| TNFSF13B  | HLA-DR+-1 | 28.50% | 7.80%  | 0.36 | 9.16E-81 |
| STT3B     | HLA-DR+-1 | 33.40% | 21.40% | 0.30 | 1.12E-80 |
| MT-ATP6   | HLA-DR+-1 | 99.70% | 99.20% | 0.41 | 1.56E-80 |
| GM2A      | HLA-DR+-1 | 23.80% | 9.90%  | 0.27 | 5.15E-80 |
| ITSN2     | HLA-DR+-1 | 44.20% | 32.90% | 0.33 | 1.02E-79 |
| GNPDA1    | HLA-DR+-1 | 22.80% | 9.00%  | 0.28 | 3.58E-79 |

|          |           |        |        |      |          |
|----------|-----------|--------|--------|------|----------|
| DAAM1    | HLA-DR+-1 | 42.80% | 26.70% | 0.38 | 3.78E-79 |
| SLC4A7   | HLA-DR+-1 | 31.50% | 20.20% | 0.31 | 2.09E-78 |
| ARF6     | HLA-DR+-1 | 42.50% | 26.70% | 0.37 | 4.02E-78 |
| PPP1R9B  | HLA-DR+-1 | 24.10% | 9.80%  | 0.27 | 5.33E-78 |
| ENTPD1   | HLA-DR+-1 | 27.70% | 6.70%  | 0.34 | 8.25E-78 |
| ACTR3    | HLA-DR+-1 | 65.10% | 61.30% | 0.30 | 9.73E-78 |
| CLIC1    | HLA-DR+-1 | 96.90% | 94.60% | 0.35 | 1.21E-77 |
| CD97     | HLA-DR+-1 | 40.80% | 33.70% | 0.30 | 1.61E-77 |
| MEF2A    | HLA-DR+-1 | 47.00% | 43.10% | 0.29 | 2.89E-77 |
| CAB39    | HLA-DR+-1 | 29.70% | 16.10% | 0.29 | 4.07E-77 |
| HLA-DOA  | HLA-DR+-1 | 16.00% | 1.60%  | 0.26 | 5.73E-77 |
| YWHAZ    | HLA-DR+-1 | 75.60% | 74.10% | 0.30 | 7.17E-77 |
| PLEKHB2  | HLA-DR+-1 | 43.80% | 32.00% | 0.32 | 1.53E-76 |
| ZFAND5   | HLA-DR+-1 | 54.20% | 51.20% | 0.29 | 6.85E-76 |
| NCEH1    | HLA-DR+-1 | 20.70% | 5.80%  | 0.25 | 1.28E-75 |
| CREBL2   | HLA-DR+-1 | 26.00% | 16.20% | 0.26 | 1.46E-75 |
| MCTP1    | HLA-DR+-1 | 23.80% | 4.80%  | 0.28 | 1.57E-75 |
| REL      | HLA-DR+-1 | 64.50% | 45.20% | 0.49 | 2.13E-75 |
| SLC48A1  | HLA-DR+-1 | 23.30% | 14.20% | 0.25 | 3.89E-75 |
| TLR4     | HLA-DR+-1 | 19.30% | 4.60%  | 0.27 | 5.04E-75 |
| FKBP5    | HLA-DR+-1 | 37.00% | 26.60% | 0.32 | 5.28E-75 |
| GNG2     | HLA-DR+-1 | 22.00% | 4.50%  | 0.30 | 6.89E-75 |
| SLC12A7  | HLA-DR+-1 | 19.30% | 4.90%  | 0.27 | 1.50E-74 |
| ZFX3     | HLA-DR+-1 | 53.60% | 45.90% | 0.31 | 1.52E-74 |
| DUSP5    | HLA-DR+-1 | 23.10% | 12.00% | 0.29 | 3.44E-74 |
| ARHGAP6  | HLA-DR+-1 | 25.60% | 11.50% | 0.31 | 4.07E-74 |
| STX7     | HLA-DR+-1 | 36.60% | 28.00% | 0.27 | 8.69E-74 |
| RPL38    | HLA-DR+-1 | 99.80% | 99.20% | 0.29 | 1.27E-73 |
| SGMS1    | HLA-DR+-1 | 25.70% | 15.60% | 0.26 | 2.01E-73 |
| RASGRP3  | HLA-DR+-1 | 20.80% | 3.70%  | 0.31 | 2.15E-73 |
| PPP1R18  | HLA-DR+-1 | 40.10% | 31.40% | 0.28 | 3.80E-73 |
| CYB5R4   | HLA-DR+-1 | 25.40% | 10.40% | 0.27 | 9.05E-73 |
| CYTH1    | HLA-DR+-1 | 35.40% | 17.10% | 0.33 | 9.72E-73 |
| ARID3A   | HLA-DR+-1 | 20.10% | 3.90%  | 0.30 | 1.10E-72 |
| TMEM176B | HLA-DR+-1 | 62.50% | 32.40% | 0.48 | 1.15E-72 |
| CAPZA1   | HLA-DR+-1 | 47.20% | 37.40% | 0.30 | 1.40E-72 |
| ABHD12   | HLA-DR+-1 | 26.70% | 14.00% | 0.27 | 2.87E-72 |
| TGOLN2   | HLA-DR+-1 | 55.50% | 51.40% | 0.26 | 3.77E-72 |
| OGFRL1   | HLA-DR+-1 | 26.20% | 10.80% | 0.31 | 4.47E-72 |
| ALCAM    | HLA-DR+-1 | 28.90% | 11.90% | 0.35 | 1.20E-71 |
| CMTM3    | HLA-DR+-1 | 32.90% | 20.70% | 0.31 | 1.35E-71 |

|              |          |         |        |      |          |
|--------------|----------|---------|--------|------|----------|
| HEXB         | HLA-DR+1 | 70.60%  | 72.50% | 0.26 | 4.86E-71 |
| SLC9A9       | HLA-DR+1 | 24.90%  | 11.70% | 0.28 | 5.05E-71 |
| CXCL1        | HLA-DR+1 | 54.20%  | 45.50% | 0.88 | 5.27E-71 |
| LAMP2        | HLA-DR+1 | 64.40%  | 55.90% | 0.33 | 5.57E-71 |
| ACSL1        | HLA-DR+1 | 24.10%  | 11.40% | 0.28 | 6.02E-71 |
| FOXN3        | HLA-DR+1 | 39.20%  | 34.00% | 0.26 | 7.24E-71 |
| SLC31A2      | HLA-DR+1 | 31.00%  | 23.30% | 0.25 | 9.17E-71 |
| GNA13        | HLA-DR+1 | 27.40%  | 15.30% | 0.28 | 1.18E-70 |
| RNF144B      | HLA-DR+1 | 22.40%  | 5.70%  | 0.30 | 2.01E-70 |
| NAPRT1       | HLA-DR+1 | 29.80%  | 17.80% | 0.28 | 3.41E-70 |
| M6PR         | HLA-DR+1 | 41.70%  | 33.70% | 0.26 | 3.57E-70 |
| TLE4         | HLA-DR+1 | 47.30%  | 42.30% | 0.32 | 4.85E-70 |
| ATP13A3      | HLA-DR+1 | 32.80%  | 25.40% | 0.30 | 5.42E-70 |
| PTBP3        | HLA-DR+1 | 29.80%  | 21.10% | 0.26 | 7.96E-70 |
| CELF1        | HLA-DR+1 | 34.30%  | 24.80% | 0.29 | 9.30E-70 |
| P2RX4        | HLA-DR+1 | 26.10%  | 11.20% | 0.28 | 1.14E-69 |
| DIAPH1       | HLA-DR+1 | 38.70%  | 33.20% | 0.26 | 4.00E-69 |
| MBP          | HLA-DR+1 | 35.40%  | 15.20% | 0.37 | 4.66E-69 |
| PREX1        | HLA-DR+1 | 23.10%  | 6.70%  | 0.27 | 9.86E-69 |
| KHDRBS1      | HLA-DR+1 | 36.40%  | 30.80% | 0.25 | 1.29E-68 |
| CRYL1        | HLA-DR+1 | 35.80%  | 26.00% | 0.28 | 2.22E-68 |
| LACC1        | HLA-DR+1 | 19.50%  | 5.50%  | 0.25 | 2.40E-68 |
| CMTM7        | HLA-DR+1 | 21.70%  | 8.50%  | 0.26 | 3.83E-68 |
| RPS29        | HLA-DR+1 | 100.00% | 99.40% | 0.26 | 1.28E-67 |
| MAP2K3       | HLA-DR+1 | 58.30%  | 55.40% | 0.30 | 1.56E-67 |
| ZNF267       | HLA-DR+1 | 37.80%  | 23.70% | 0.37 | 2.02E-67 |
| DDX3X        | HLA-DR+1 | 73.80%  | 69.70% | 0.33 | 2.28E-67 |
| RP11-108M9.4 | HLA-DR+1 | 19.00%  | 8.90%  | 0.25 | 2.64E-67 |
| PRKACB       | HLA-DR+1 | 20.30%  | 7.60%  | 0.25 | 2.80E-67 |
| HHEX         | HLA-DR+1 | 19.60%  | 4.20%  | 0.27 | 3.99E-67 |
| CBX4         | HLA-DR+1 | 23.60%  | 14.30% | 0.25 | 4.40E-67 |
| LAP3         | HLA-DR+1 | 36.90%  | 30.60% | 0.26 | 5.16E-67 |
| USP9X        | HLA-DR+1 | 32.00%  | 21.40% | 0.27 | 7.69E-67 |
| SLC7A8       | HLA-DR+1 | 25.20%  | 13.00% | 0.28 | 1.21E-66 |
| TRIM28       | HLA-DR+1 | 32.50%  | 24.40% | 0.25 | 1.73E-66 |
| FNIP2        | HLA-DR+1 | 44.50%  | 43.40% | 0.32 | 2.27E-66 |
| PFDN5        | HLA-DR+1 | 98.40%  | 98.20% | 0.27 | 4.53E-66 |
| PLA2G16      | HLA-DR+1 | 42.20%  | 35.30% | 0.27 | 5.08E-66 |
| PTPRE        | HLA-DR+1 | 38.80%  | 18.30% | 0.39 | 9.23E-66 |
| TPT1         | HLA-DR+1 | 99.90%  | 99.70% | 0.27 | 1.16E-65 |
| PICALM       | HLA-DR+1 | 39.50%  | 31.00% | 0.27 | 1.56E-65 |

|           |          |        |        |      |          |
|-----------|----------|--------|--------|------|----------|
| NBPF10    | HLA-DR+1 | 36.20% | 30.70% | 0.27 | 2.23E-65 |
| CD44      | HLA-DR+1 | 91.20% | 90.10% | 0.37 | 6.40E-65 |
| SLC25A24  | HLA-DR+1 | 27.20% | 15.20% | 0.26 | 9.82E-65 |
| SNX29     | HLA-DR+1 | 28.20% | 17.40% | 0.26 | 2.77E-64 |
| LFNG      | HLA-DR+1 | 17.80% | 3.70%  | 0.26 | 2.99E-64 |
| AHR       | HLA-DR+1 | 51.50% | 36.00% | 0.40 | 3.67E-64 |
| ABI1      | HLA-DR+1 | 39.50% | 31.60% | 0.25 | 8.80E-64 |
| PTPLAD2   | HLA-DR+1 | 24.80% | 10.00% | 0.26 | 9.75E-64 |
| MAP3K2    | HLA-DR+1 | 38.00% | 29.60% | 0.28 | 1.50E-63 |
| RPS6KA3   | HLA-DR+1 | 38.40% | 28.00% | 0.27 | 1.73E-63 |
| ARHGEF10L | HLA-DR+1 | 21.10% | 7.20%  | 0.26 | 2.11E-63 |
| C6orf62   | HLA-DR+1 | 58.50% | 57.20% | 0.27 | 3.11E-63 |
| MSN       | HLA-DR+1 | 71.30% | 69.80% | 0.27 | 8.26E-63 |
| ADAM9     | HLA-DR+1 | 45.80% | 34.10% | 0.30 | 1.44E-62 |
| CELF2     | HLA-DR+1 | 50.20% | 41.20% | 0.31 | 1.50E-62 |
| RAP2B     | HLA-DR+1 | 27.00% | 10.90% | 0.31 | 3.15E-62 |
| RIT1      | HLA-DR+1 | 35.10% | 24.00% | 0.29 | 9.91E-62 |
| FLI1      | HLA-DR+1 | 21.90% | 6.60%  | 0.26 | 1.37E-61 |
| GIMAP1    | HLA-DR+1 | 17.70% | 3.00%  | 0.26 | 1.38E-61 |
| MIS18BP1  | HLA-DR+1 | 29.80% | 17.60% | 0.31 | 2.74E-61 |
| S100A10   | HLA-DR+1 | 99.40% | 99.30% | 0.40 | 9.25E-61 |
| RPS21     | HLA-DR+1 | 99.60% | 98.60% | 0.29 | 1.38E-60 |
| ATP5D     | HLA-DR+1 | 41.40% | 31.30% | 0.33 | 1.69E-60 |
| GCHFR     | HLA-DR+1 | 18.30% | 8.20%  | 0.26 | 3.18E-60 |
| FRMD4A    | HLA-DR+1 | 19.10% | 4.60%  | 0.26 | 9.67E-60 |
| MMP19     | HLA-DR+1 | 20.80% | 15.60% | 0.25 | 1.11E-59 |
| ANTXR2    | HLA-DR+1 | 38.30% | 27.90% | 0.29 | 3.63E-59 |
| MT-ND4    | HLA-DR+1 | 99.80% | 99.60% | 0.31 | 4.80E-59 |
| TMEM160   | HLA-DR+1 | 40.20% | 32.90% | 0.26 | 1.51E-58 |
| CLN8      | HLA-DR+1 | 30.50% | 20.20% | 0.27 | 1.57E-58 |
| NSMAF     | HLA-DR+1 | 23.40% | 9.30%  | 0.30 | 1.73E-58 |
| C19orf60  | HLA-DR+1 | 61.60% | 58.10% | 0.26 | 3.51E-58 |
| CCL13     | HLA-DR+1 | 15.60% | 2.40%  | 0.36 | 1.03E-57 |
| PLK3      | HLA-DR+1 | 35.00% | 23.20% | 0.31 | 4.65E-57 |
| PRDM1     | HLA-DR+1 | 22.60% | 5.60%  | 0.32 | 8.08E-57 |
| IFNGR2    | HLA-DR+1 | 37.00% | 28.20% | 0.26 | 8.37E-57 |
| PIM3      | HLA-DR+1 | 33.00% | 24.10% | 0.32 | 3.45E-56 |
| KIAA1033  | HLA-DR+1 | 31.90% | 21.80% | 0.25 | 5.09E-56 |
| STX11     | HLA-DR+1 | 32.00% | 14.30% | 0.29 | 6.79E-56 |
| SLC16A10  | HLA-DR+1 | 27.00% | 15.50% | 0.30 | 1.29E-55 |
| NRP2      | HLA-DR+1 | 45.30% | 32.50% | 0.34 | 2.12E-55 |



|          |          |        |        |      |          |
|----------|----------|--------|--------|------|----------|
| RAB32    | HLA-DR+1 | 41.40% | 34.00% | 0.25 | 2.27E-55 |
| WSB1     | HLA-DR+1 | 67.60% | 68.50% | 0.27 | 2.33E-55 |
| THBD     | HLA-DR+1 | 44.70% | 30.30% | 0.51 | 2.89E-55 |
| TGFB1    | HLA-DR+1 | 48.70% | 43.10% | 0.26 | 4.62E-55 |
| LPCAT2   | HLA-DR+1 | 30.20% | 15.60% | 0.29 | 3.32E-54 |
| STMN1    | HLA-DR+1 | 35.00% | 14.90% | 0.35 | 4.18E-54 |
| MMP9     | HLA-DR+1 | 17.50% | 4.30%  | 0.43 | 7.95E-54 |
| MYL12A   | HLA-DR+1 | 90.30% | 91.00% | 0.27 | 8.86E-54 |
| ABL2     | HLA-DR+1 | 62.50% | 66.70% | 0.26 | 1.83E-53 |
| NFKBID   | HLA-DR+1 | 31.40% | 14.20% | 0.32 | 2.60E-53 |
| MT-ND4L  | HLA-DR+1 | 88.30% | 86.30% | 0.32 | 4.73E-53 |
| MTRNR2L8 | HLA-DR+1 | 69.40% | 63.80% | 0.40 | 4.75E-53 |
| COCH     | HLA-DR+1 | 16.20% | 5.50%  | 0.28 | 7.35E-53 |
| MAP3K11  | HLA-DR+1 | 21.20% | 8.30%  | 0.26 | 8.95E-53 |
| MT-ATP8  | HLA-DR+1 | 38.70% | 28.90% | 0.28 | 2.04E-52 |
| RHOB     | HLA-DR+1 | 57.30% | 52.90% | 0.34 | 5.60E-52 |
| MAP2K1   | HLA-DR+1 | 28.70% | 17.20% | 0.27 | 9.57E-52 |
| HSP90AA1 | HLA-DR+1 | 97.00% | 97.80% | 0.39 | 2.30E-51 |
| MIR155HG | HLA-DR+1 | 22.40% | 7.00%  | 0.38 | 4.44E-50 |
| CFL1     | HLA-DR+1 | 98.70% | 98.40% | 0.25 | 5.24E-50 |
| NRP1     | HLA-DR+1 | 37.10% | 25.80% | 0.29 | 3.18E-49 |
| BID      | HLA-DR+1 | 35.60% | 25.70% | 0.27 | 3.45E-49 |
| UPP1     | HLA-DR+1 | 40.10% | 26.80% | 0.31 | 3.72E-49 |
| ADRB2    | HLA-DR+1 | 23.40% | 10.60% | 0.27 | 4.93E-49 |
| EMP1     | HLA-DR+1 | 88.00% | 87.30% | 0.35 | 1.39E-48 |
| RPL36A   | HLA-DR+1 | 92.10% | 94.90% | 0.27 | 4.43E-46 |
| CCRL2    | HLA-DR+1 | 16.50% | 4.80%  | 0.25 | 2.56E-45 |
| NABP1    | HLA-DR+1 | 31.30% | 20.90% | 0.29 | 5.34E-45 |
| APOC1    | HLA-DR+1 | 14.50% | 10.10% | 0.57 | 2.06E-44 |
| CALM2    | HLA-DR+1 | 97.00% | 98.00% | 0.26 | 2.58E-44 |
| ICAM1    | HLA-DR+1 | 52.10% | 38.00% | 0.40 | 3.84E-44 |
| ARPC1B   | HLA-DR+1 | 90.30% | 86.20% | 0.28 | 8.33E-44 |
| INSIG1   | HLA-DR+1 | 64.10% | 61.50% | 0.37 | 1.31E-43 |
| KDM6B    | HLA-DR+1 | 60.90% | 55.20% | 0.31 | 2.24E-43 |
| ASAP1    | HLA-DR+1 | 34.00% | 23.10% | 0.25 | 6.50E-43 |
| SLC43A3  | HLA-DR+1 | 36.50% | 25.30% | 0.27 | 3.73E-42 |
| LUCAT1   | HLA-DR+1 | 28.80% | 13.50% | 0.33 | 1.30E-41 |
| CXCL5    | HLA-DR+1 | 10.50% | 1.30%  | 0.39 | 1.53E-41 |
| LPAR6    | HLA-DR+1 | 21.70% | 7.50%  | 0.31 | 6.48E-39 |
| JUN      | HLA-DR+1 | 88.10% | 87.40% | 0.41 | 3.50E-38 |
| MGST2    | HLA-DR+1 | 31.80% | 15.90% | 0.26 | 3.94E-38 |

|          |           |         |        |      |                       |
|----------|-----------|---------|--------|------|-----------------------|
| MT-ND5   | HLA-DR+-1 | 98.80%  | 98.40% | 0.25 | 3.96E-38              |
| PLAU     | HLA-DR+-1 | 51.60%  | 33.30% | 0.40 | 5.90E-38              |
| PPP1R15A | HLA-DR+-1 | 87.90%  | 91.00% | 0.29 | 4.75E-37              |
| NEAT1    | HLA-DR+-1 | 99.50%  | 99.40% | 0.31 | 8.98E-37              |
| TNFAIP8  | HLA-DR+-1 | 38.10%  | 24.90% | 0.35 | 1.42E-36              |
| XIST     | HLA-DR+-1 | 60.90%  | 43.10% | 0.39 | 1.51E-36              |
| BTG1     | HLA-DR+-1 | 70.30%  | 68.90% | 0.30 | 2.05E-36              |
| RN7SL1   | HLA-DR+-1 | 17.70%  | 10.80% | 0.31 | 7.94E-30              |
| HMOX1    | HLA-DR+-1 | 67.00%  | 55.10% | 0.41 | 1.02E-27              |
| CCL2     | HLA-DR+-1 | 69.90%  | 70.50% | 0.46 | 4.51E-25              |
| PMAIP1   | HLA-DR+-1 | 40.30%  | 25.60% | 0.32 | 7.48E-25              |
| FOSB     | HLA-DR+-1 | 82.00%  | 86.00% | 0.27 | 1.73E-23              |
| FILIP1L  | HLA-DR+-1 | 52.20%  | 42.50% | 0.29 | 2.95E-23              |
| SOD2     | HLA-DR+-1 | 81.50%  | 87.40% | 0.26 | 9.32E-18              |
| 7SK.2    | HLA-DR+-1 | 25.10%  | 20.00% | 0.26 | 1.51E-16              |
| APOE     | HLA-DR+-1 | 18.20%  | 14.20% | 0.45 | 2.17E-16              |
| IL1B     | HLA-DR+-2 | 86.80%  | 22.10% | 3.45 | 0.00E+00              |
| HLA-DRA  | HLA-DR+-2 | 97.20%  | 38.20% | 3.10 | 0.00E+00              |
| IL8      | HLA-DR+-2 | 95.60%  | 66.90% | 3.00 | 0.00E+00              |
| GOS2     | HLA-DR+-2 | 65.50%  | 17.80% | 2.98 | 0.00E+00              |
| HLA-DPB1 | HLA-DR+-2 | 97.40%  | 38.10% | 2.87 | 0.00E+00              |
| HLA-DPA1 | HLA-DR+-2 | 99.20%  | 28.60% | 2.86 | 0.00E+00              |
| FCER1A   | HLA-DR+-2 | 81.10%  | 2.80%  | 2.75 | 0.00E+00              |
| HLA-DQB1 | HLA-DR+-2 | 96.40%  | 13.40% | 2.70 | 0.00E+00              |
| HLA-DQA1 | HLA-DR+-2 | 95.10%  | 9.40%  | 2.70 | 0.00E+00              |
| HLA-DRB5 | HLA-DR+-2 | 96.60%  | 17.50% | 2.59 | 0.00E+00              |
| HLA-DRB1 | HLA-DR+-2 | 98.70%  | 29.00% | 2.58 | 0.00E+00              |
| CD74     | HLA-DR+-2 | 100.00% | 48.60% | 2.45 | 0.00E+00              |
| SRGN     | HLA-DR+-2 | 98.70%  | 42.00% | 2.37 | 0.00E+00              |
| GPR183   | HLA-DR+-2 | 92.20%  | 17.60% | 2.35 | 0.00E+00              |
| PLAUR    | HLA-DR+-2 | 93.80%  | 58.90% | 2.03 | 0.00E+00              |
| HLA-DQA2 | HLA-DR+-2 | 77.70%  | 5.10%  | 2.02 | 0.00E+00              |
| HLA-DMA  | HLA-DR+-2 | 95.90%  | 18.50% | 1.79 | 0.00E+00              |
| IL1R2    | HLA-DR+-2 | 66.60%  | 1.60%  | 1.73 | 0.00E+00              |
| REL      | HLA-DR+-2 | 92.70%  | 45.20% | 1.70 | 0.00E+00              |
| CLEC10A  | HLA-DR+-2 | 76.90%  | 1.60%  | 1.65 | 0.00E+00              |
| TNFAIP8  | HLA-DR+-2 | 79.80%  | 24.10% | 1.52 | 0.00E+00              |
| SERPINB9 | HLA-DR+-2 | 79.80%  | 16.40% | 1.51 | 0.00E+00              |
| INSIG1   | HLA-DR+-2 | 90.20%  | 60.60% | 1.48 | 0.00E+00              |
| C15orf48 | HLA-DR+-2 | 67.10%  | 7.90%  | 2.03 | 3.46209011288063e-315 |

|           |          |        |        |      |                       |
|-----------|----------|--------|--------|------|-----------------------|
| TYROBP    | HLA-DR+2 | 95.90% | 19.20% | 1.41 | 2.46239003348338e-311 |
| BCL2A1    | HLA-DR+2 | 75.90% | 10.70% | 2.37 | 3.62E-308             |
| LYZ       | HLA-DR+2 | 93.30% | 13.30% | 2.11 | 2.86E-304             |
| RGS1      | HLA-DR+2 | 90.40% | 14.20% | 2.09 | 4.34E-303             |
| LGALS2    | HLA-DR+2 | 56.50% | 0.40%  | 1.12 | 1.00E-297             |
| CD83      | HLA-DR+2 | 93.00% | 24.00% | 1.86 | 6.44E-292             |
| STX11     | HLA-DR+2 | 74.60% | 13.80% | 1.27 | 7.04E-288             |
| LST1      | HLA-DR+2 | 86.80% | 9.00%  | 1.35 | 3.03E-286             |
| FCER1G    | HLA-DR+2 | 95.10% | 18.20% | 1.53 | 6.20E-281             |
| CXCL3     | HLA-DR+2 | 88.90% | 52.70% | 2.46 | 3.75E-274             |
| LAPTM5    | HLA-DR+2 | 94.60% | 19.70% | 1.34 | 5.88E-268             |
| TRAF1     | HLA-DR+2 | 64.50% | 5.50%  | 1.35 | 7.18E-268             |
| PLEK      | HLA-DR+2 | 79.50% | 8.90%  | 1.58 | 5.51E-259             |
| CD1C      | HLA-DR+2 | 46.40% | 0.20%  | 1.32 | 3.60E-256             |
| HLA-DMB   | HLA-DR+2 | 82.10% | 8.90%  | 1.29 | 5.19E-253             |
| CFLAR     | HLA-DR+2 | 86.00% | 37.90% | 1.16 | 3.52E-249             |
| CYTIP     | HLA-DR+2 | 69.20% | 4.50%  | 1.31 | 4.83E-248             |
| AMICA1    | HLA-DR+2 | 54.40% | 1.00%  | 0.91 | 8.30E-248             |
| CSF2RA    | HLA-DR+2 | 63.20% | 3.50%  | 1.11 | 2.54E-244             |
| AIF1      | HLA-DR+2 | 88.90% | 14.80% | 1.06 | 4.70E-243             |
| CPVL      | HLA-DR+2 | 77.50% | 9.80%  | 1.50 | 3.06E-242             |
| MS4A6A    | HLA-DR+2 | 86.80% | 12.10% | 1.39 | 9.03E-241             |
| HCST      | HLA-DR+2 | 78.50% | 8.40%  | 1.27 | 2.35E-235             |
| RILPL2    | HLA-DR+2 | 70.50% | 30.80% | 0.97 | 5.58E-235             |
| ATP2B1    | HLA-DR+2 | 84.70% | 48.60% | 1.06 | 1.60E-233             |
| PABPC1    | HLA-DR+2 | 99.50% | 92.70% | 0.93 | 6.76E-233             |
| LINC00936 | HLA-DR+2 | 60.10% | 16.60% | 1.09 | 1.89E-231             |
| FCGR2B    | HLA-DR+2 | 77.50% | 7.80%  | 1.21 | 1.56E-227             |
| MIR155HG  | HLA-DR+2 | 55.70% | 6.70%  | 1.52 | 3.53E-226             |
| KYNU      | HLA-DR+2 | 67.90% | 12.40% | 1.22 | 4.89E-226             |
| CXCR4     | HLA-DR+2 | 76.70% | 9.40%  | 1.40 | 1.48E-216             |
| RHOF      | HLA-DR+2 | 54.70% | 4.90%  | 0.98 | 4.69E-213             |
| CCL3      | HLA-DR+2 | 81.10% | 40.40% | 2.18 | 4.51E-212             |
| IL10      | HLA-DR+2 | 52.80% | 4.30%  | 1.62 | 1.31E-211             |
| LUCAT1    | HLA-DR+2 | 62.40% | 13.10% | 1.10 | 1.65E-211             |
| PHACTR1   | HLA-DR+2 | 60.40% | 4.60%  | 1.09 | 1.72E-211             |
| BTG1      | HLA-DR+2 | 87.60% | 68.30% | 1.17 | 1.24E-208             |
| EHD1      | HLA-DR+2 | 68.70% | 35.20% | 0.91 | 9.16E-208             |
| CCR7      | HLA-DR+2 | 46.10% | 1.50%  | 1.65 | 6.00E-207             |
| CYBA      | HLA-DR+2 | 99.00% | 77.20% | 1.02 | 1.84E-205             |
| OLR1      | HLA-DR+2 | 53.40% | 2.90%  | 1.30 | 2.15E-204             |

|          |          |        |        |      |           |
|----------|----------|--------|--------|------|-----------|
| CFP      | HLA-DR+2 | 50.30% | 1.50%  | 0.82 | 2.65E-204 |
| CD86     | HLA-DR+2 | 59.80% | 3.70%  | 0.92 | 4.75E-203 |
| NLRP3    | HLA-DR+2 | 56.50% | 3.10%  | 1.07 | 1.30E-202 |
| SAT1     | HLA-DR+2 | 99.00% | 95.20% | 1.25 | 1.63E-202 |
| TXNRD1   | HLA-DR+2 | 63.70% | 31.40% | 0.96 | 6.71E-202 |
| CD48     | HLA-DR+2 | 50.30% | 1.60%  | 0.78 | 1.25E-201 |
| AGPAT9   | HLA-DR+2 | 47.40% | 2.20%  | 0.92 | 3.60E-198 |
| STK4     | HLA-DR+2 | 66.30% | 15.40% | 1.03 | 2.90E-196 |
| TNFAIP3  | HLA-DR+2 | 84.50% | 27.60% | 1.44 | 2.04E-195 |
| NFKB1    | HLA-DR+2 | 72.00% | 33.10% | 1.05 | 2.91E-192 |
| CXCL16   | HLA-DR+2 | 69.20% | 21.30% | 0.98 | 1.22E-191 |
| FCGR2A   | HLA-DR+2 | 76.40% | 11.30% | 1.11 | 6.24E-190 |
| MIR29A   | HLA-DR+2 | 56.20% | 14.40% | 0.82 | 1.70E-187 |
| PNRC1    | HLA-DR+2 | 88.30% | 56.70% | 1.08 | 6.63E-187 |
| TNFRSF1B | HLA-DR+2 | 62.20% | 8.20%  | 1.00 | 2.95E-185 |
| RNASET2  | HLA-DR+2 | 74.60% | 30.10% | 0.99 | 2.98E-182 |
| ITGB2    | HLA-DR+2 | 72.30% | 8.90%  | 0.97 | 5.46E-182 |
| SERPINB1 | HLA-DR+2 | 68.90% | 49.60% | 0.85 | 5.46E-181 |
| BID      | HLA-DR+2 | 61.40% | 25.30% | 0.82 | 2.83E-180 |
| EIF4E    | HLA-DR+2 | 80.60% | 60.40% | 0.99 | 2.66E-178 |
| TMEM123  | HLA-DR+2 | 76.90% | 42.80% | 0.84 | 5.94E-178 |
| CD53     | HLA-DR+2 | 70.20% | 8.70%  | 0.95 | 2.82E-177 |
| LPXN     | HLA-DR+2 | 62.40% | 7.70%  | 0.90 | 2.73E-175 |
| RNASE6   | HLA-DR+2 | 62.20% | 5.50%  | 0.96 | 4.37E-175 |
| CLEC7A   | HLA-DR+2 | 61.90% | 5.60%  | 0.94 | 4.97E-175 |
| BIRC3    | HLA-DR+2 | 79.80% | 21.30% | 1.40 | 5.65E-174 |
| IRF8     | HLA-DR+2 | 60.10% | 7.40%  | 1.16 | 1.32E-173 |
| NFKBID   | HLA-DR+2 | 64.80% | 14.00% | 0.90 | 4.24E-172 |
| LITAF    | HLA-DR+2 | 81.90% | 60.40% | 0.81 | 2.48E-171 |
| VSIG4    | HLA-DR+2 | 71.50% | 10.90% | 0.89 | 8.37E-169 |
| PPIF     | HLA-DR+2 | 54.70% | 10.30% | 0.86 | 1.48E-164 |
| PTPRC    | HLA-DR+2 | 66.10% | 8.80%  | 0.80 | 4.07E-163 |
| MAP2K3   | HLA-DR+2 | 81.90% | 54.70% | 0.80 | 4.23E-162 |
| EREG     | HLA-DR+2 | 45.90% | 9.70%  | 1.73 | 8.18E-162 |
| CD37     | HLA-DR+2 | 67.40% | 8.70%  | 0.85 | 2.66E-160 |
| MXD1     | HLA-DR+2 | 44.00% | 19.70% | 0.74 | 4.58E-160 |
| PDE4B    | HLA-DR+2 | 69.70% | 20.10% | 0.89 | 4.16E-157 |
| CTSS     | HLA-DR+2 | 89.60% | 30.20% | 0.93 | 3.00E-156 |
| CORO1A   | HLA-DR+2 | 63.20% | 7.60%  | 0.85 | 1.00E-155 |
| TNIP1    | HLA-DR+2 | 57.00% | 32.50% | 0.67 | 2.06E-155 |
| IL1A     | HLA-DR+2 | 47.90% | 3.10%  | 1.08 | 1.08E-154 |

|          |          |         |         |      |           |
|----------|----------|---------|---------|------|-----------|
| LCP1     | HLA-DR+2 | 62.20%  | 7.30%   | 0.78 | 6.71E-152 |
| DUSP4    | HLA-DR+2 | 49.20%  | 15.70%  | 1.07 | 3.66E-150 |
| THAP2    | HLA-DR+2 | 47.90%  | 17.10%  | 0.78 | 1.71E-146 |
| IL10RA   | HLA-DR+2 | 53.10%  | 4.70%   | 0.73 | 5.60E-145 |
| MAP3K8   | HLA-DR+2 | 79.00%  | 51.40%  | 0.82 | 1.37E-143 |
| CMTM6    | HLA-DR+2 | 72.00%  | 43.30%  | 0.73 | 6.57E-143 |
| IL1RN    | HLA-DR+2 | 44.60%  | 3.70%   | 1.47 | 1.69E-141 |
| ARL8B    | HLA-DR+2 | 61.70%  | 29.20%  | 0.69 | 2.32E-141 |
| VASP     | HLA-DR+2 | 73.10%  | 32.60%  | 0.80 | 8.50E-141 |
| HCLS1    | HLA-DR+2 | 60.90%  | 8.30%   | 0.70 | 1.28E-140 |
| PTPRE    | HLA-DR+2 | 65.80%  | 18.50%  | 0.91 | 1.61E-140 |
| CCL22    | HLA-DR+2 | 28.20%  | 0.70%   | 1.18 | 4.04E-140 |
| GMFG     | HLA-DR+2 | 72.00%  | 14.40%  | 0.74 | 2.18E-138 |
| PMAIP1   | HLA-DR+2 | 73.60%  | 25.20%  | 1.15 | 3.32E-138 |
| VAMP8    | HLA-DR+2 | 71.80%  | 17.30%  | 0.57 | 4.53E-138 |
| DNAJB6   | HLA-DR+2 | 84.50%  | 70.50%  | 0.70 | 5.91E-138 |
| NFKBIA   | HLA-DR+2 | 98.40%  | 92.20%  | 1.10 | 1.14E-137 |
| ISG20    | HLA-DR+2 | 47.90%  | 17.90%  | 0.82 | 2.80E-137 |
| EZR      | HLA-DR+2 | 84.20%  | 59.10%  | 0.85 | 4.19E-137 |
| BAZ1A    | HLA-DR+2 | 81.60%  | 56.10%  | 0.78 | 1.31E-136 |
| NINJ1    | HLA-DR+2 | 66.80%  | 37.00%  | 0.89 | 8.48E-136 |
| SAMSN1   | HLA-DR+2 | 48.70%  | 4.50%   | 1.16 | 1.25E-135 |
| FTH1     | HLA-DR+2 | 100.00% | 100.00% | 0.91 | 3.36E-135 |
| CXCL2    | HLA-DR+2 | 85.80%  | 59.00%  | 1.68 | 3.88E-135 |
| HLA-B    | HLA-DR+2 | 99.70%  | 98.10%  | 0.71 | 3.88E-134 |
| GLIPR1   | HLA-DR+2 | 78.50%  | 48.90%  | 0.85 | 1.38E-133 |
| PPP1R15A | HLA-DR+2 | 98.40%  | 90.40%  | 0.96 | 9.33E-133 |
| ETV3     | HLA-DR+2 | 49.20%  | 10.50%  | 0.66 | 4.90E-130 |
| CREM     | HLA-DR+2 | 69.40%  | 44.70%  | 1.01 | 1.74E-129 |
| C1orf162 | HLA-DR+2 | 55.40%  | 6.60%   | 0.85 | 1.91E-129 |
| PKIB     | HLA-DR+2 | 31.10%  | 1.00%   | 0.55 | 3.72E-128 |
| FNBP1    | HLA-DR+2 | 61.90%  | 21.90%  | 0.75 | 5.84E-127 |
| GNA15    | HLA-DR+2 | 47.70%  | 4.50%   | 0.69 | 1.11E-125 |
| GPX1     | HLA-DR+2 | 95.60%  | 83.60%  | 0.76 | 8.89E-122 |
| MCL1     | HLA-DR+2 | 90.40%  | 70.90%  | 0.77 | 2.39E-120 |
| H3F3A    | HLA-DR+2 | 98.70%  | 98.30%  | 0.58 | 6.32E-120 |
| DSE      | HLA-DR+2 | 56.70%  | 23.20%  | 0.74 | 1.36E-117 |
| AKAP13   | HLA-DR+2 | 81.90%  | 61.10%  | 0.71 | 2.25E-117 |
| GPBP1    | HLA-DR+2 | 75.90%  | 56.80%  | 0.63 | 4.52E-117 |
| CD1E     | HLA-DR+2 | 22.30%  | 0.10%   | 0.43 | 5.00E-116 |
| IL4I1    | HLA-DR+2 | 27.70%  | 0.80%   | 0.58 | 2.75E-114 |

|            |          |         |        |      |           |
|------------|----------|---------|--------|------|-----------|
| GPSM3      | HLA-DR+2 | 51.80%  | 6.70%  | 0.67 | 2.93E-114 |
| RALA       | HLA-DR+2 | 53.90%  | 35.40% | 0.58 | 5.94E-113 |
| RP6-91H8.3 | HLA-DR+2 | 26.40%  | 0.50%  | 0.49 | 1.45E-112 |
| NAMPT      | HLA-DR+2 | 77.50%  | 51.70% | 0.76 | 9.00E-112 |
| ANKRD28    | HLA-DR+2 | 72.50%  | 58.60% | 0.73 | 1.08E-110 |
| FABP5      | HLA-DR+2 | 68.10%  | 20.30% | 1.07 | 5.01E-110 |
| ATP13A3    | HLA-DR+2 | 53.10%  | 25.10% | 0.67 | 2.39E-109 |
| TCHH       | HLA-DR+2 | 30.80%  | 1.70%  | 0.76 | 5.24E-109 |
| GPR132     | HLA-DR+2 | 35.80%  | 2.00%  | 0.50 | 2.46E-108 |
| ADAM8      | HLA-DR+2 | 31.30%  | 1.40%  | 0.51 | 3.18E-107 |
| SPINT2     | HLA-DR+2 | 45.30%  | 5.00%  | 0.59 | 1.19E-106 |
| AP1S2      | HLA-DR+2 | 78.50%  | 38.80% | 0.73 | 8.00E-106 |
| DAPP1      | HLA-DR+2 | 27.70%  | 0.80%  | 0.51 | 2.95E-105 |
| NFKB2      | HLA-DR+2 | 56.50%  | 22.20% | 0.61 | 7.79E-105 |
| B3GNT5     | HLA-DR+2 | 43.30%  | 6.00%  | 0.65 | 1.09E-104 |
| TMSB10     | HLA-DR+2 | 100.00% | 98.00% | 0.63 | 1.16E-104 |
| SDCBP      | HLA-DR+2 | 92.50%  | 90.50% | 0.70 | 1.38E-104 |
| MCOLN2     | HLA-DR+2 | 28.50%  | 1.00%  | 0.46 | 1.91E-104 |
| EVI2B      | HLA-DR+2 | 50.30%  | 7.20%  | 0.61 | 2.38E-102 |
| MIR142     | HLA-DR+2 | 33.70%  | 2.00%  | 0.54 | 8.78E-101 |
| RHOG       | HLA-DR+2 | 71.50%  | 41.70% | 0.68 | 1.27E-100 |
| ARHGDI3    | HLA-DR+2 | 70.50%  | 19.70% | 0.68 | 3.99E-100 |
| PIM3       | HLA-DR+2 | 59.30%  | 23.60% | 0.73 | 9.09E-100 |
| RASGEF1B   | HLA-DR+2 | 60.40%  | 21.30% | 0.85 | 2.68E-99  |
| PTGIR      | HLA-DR+2 | 39.90%  | 11.10% | 0.61 | 9.70E-99  |
| DNTTIP2    | HLA-DR+2 | 64.00%  | 41.50% | 0.62 | 2.44E-98  |
| ALCAM      | HLA-DR+2 | 50.00%  | 12.10% | 0.63 | 7.48E-98  |
| CSTA       | HLA-DR+2 | 44.80%  | 5.90%  | 0.65 | 1.25E-97  |
| PLD4       | HLA-DR+2 | 21.20%  | 0.20%  | 0.35 | 4.46E-97  |
| MYO1G      | HLA-DR+2 | 38.90%  | 3.50%  | 0.53 | 2.23E-96  |
| HNRNPC     | HLA-DR+2 | 93.30%  | 81.60% | 0.57 | 4.52E-96  |
| CLEC5A     | HLA-DR+2 | 31.30%  | 1.70%  | 0.55 | 6.35E-96  |
| ALOX5AP    | HLA-DR+2 | 58.00%  | 13.00% | 0.62 | 2.71E-94  |
| FGR        | HLA-DR+2 | 42.00%  | 5.40%  | 0.49 | 2.17E-93  |
| ZNF267     | HLA-DR+2 | 56.70%  | 23.80% | 0.68 | 3.26E-93  |
| NR4A2      | HLA-DR+2 | 71.50%  | 55.10% | 0.95 | 5.98E-93  |
| CD40       | HLA-DR+2 | 38.60%  | 24.00% | 0.49 | 6.58E-92  |
| SMAP2      | HLA-DR+2 | 49.20%  | 10.60% | 0.63 | 8.48E-92  |
| LINC00152  | HLA-DR+2 | 61.70%  | 47.80% | 0.82 | 1.31E-91  |
| MNDA       | HLA-DR+2 | 42.70%  | 5.20%  | 0.73 | 2.99E-91  |
| C5AR1      | HLA-DR+2 | 46.90%  | 8.90%  | 0.87 | 2.94E-89  |

|          |          |         |         |      |          |
|----------|----------|---------|---------|------|----------|
| LY86     | HLA-DR+2 | 38.10%  | 3.80%   | 0.51 | 8.13E-89 |
| SORL1    | HLA-DR+2 | 33.40%  | 2.70%   | 0.48 | 6.84E-87 |
| CARD16   | HLA-DR+2 | 40.40%  | 6.00%   | 0.60 | 3.56E-86 |
| ACSL5    | HLA-DR+2 | 36.00%  | 4.70%   | 0.45 | 4.15E-86 |
| TCOF1    | HLA-DR+2 | 31.90%  | 11.90%  | 0.59 | 5.63E-86 |
| FCN1     | HLA-DR+2 | 18.90%  | 0.20%   | 0.50 | 5.77E-86 |
| ETS2     | HLA-DR+2 | 69.40%  | 30.80%  | 0.79 | 2.41E-85 |
| CCL3L1   | HLA-DR+2 | 39.40%  | 5.20%   | 1.31 | 5.44E-85 |
| CCL4     | HLA-DR+2 | 64.20%  | 33.70%  | 1.50 | 7.37E-85 |
| RIT1     | HLA-DR+2 | 49.00%  | 24.10%  | 0.57 | 8.00E-85 |
| OGFRL1   | HLA-DR+2 | 41.50%  | 11.10%  | 0.56 | 1.18E-84 |
| YBX1     | HLA-DR+2 | 85.20%  | 81.90%  | 0.76 | 1.49E-84 |
| LAT2     | HLA-DR+2 | 37.00%  | 3.90%   | 0.46 | 7.11E-84 |
| TNF      | HLA-DR+2 | 54.70%  | 14.70%  | 1.08 | 8.95E-84 |
| TET2     | HLA-DR+2 | 42.50%  | 7.60%   | 0.52 | 1.07E-83 |
| ADAM28   | HLA-DR+2 | 21.00%  | 0.40%   | 0.35 | 3.76E-83 |
| PRDM1    | HLA-DR+2 | 40.20%  | 5.90%   | 0.71 | 4.26E-83 |
| CDC42EP3 | HLA-DR+2 | 55.70%  | 16.80%  | 0.75 | 4.61E-83 |
| SPI1     | HLA-DR+2 | 42.70%  | 7.10%   | 0.49 | 9.42E-83 |
| BASP1    | HLA-DR+2 | 46.10%  | 30.30%  | 0.55 | 2.65E-82 |
| PTPN1    | HLA-DR+2 | 56.50%  | 33.60%  | 0.57 | 2.27E-81 |
| LCP2     | HLA-DR+2 | 38.90%  | 5.30%   | 0.60 | 7.42E-81 |
| SLC7A11  | HLA-DR+2 | 31.30%  | 6.70%   | 0.75 | 1.03E-80 |
| RBM47    | HLA-DR+2 | 44.00%  | 6.90%   | 0.57 | 1.32E-80 |
| AREG     | HLA-DR+2 | 24.40%  | 1.00%   | 0.41 | 1.87E-80 |
| MAFG     | HLA-DR+2 | 50.50%  | 25.00%  | 0.53 | 1.97E-80 |
| TNIP3    | HLA-DR+2 | 21.50%  | 1.00%   | 0.68 | 9.37E-80 |
| DDX3X    | HLA-DR+2 | 79.80%  | 69.70%  | 0.58 | 2.30E-79 |
| RPS29    | HLA-DR+2 | 100.00% | 99.40%  | 0.47 | 2.64E-79 |
| MMP9     | HLA-DR+2 | 34.70%  | 4.40%   | 0.73 | 3.12E-79 |
| CST3     | HLA-DR+2 | 98.40%  | 99.10%  | 0.72 | 7.22E-79 |
| TES      | HLA-DR+2 | 52.30%  | 32.50%  | 0.52 | 1.20E-78 |
| HMGA1    | HLA-DR+2 | 56.50%  | 20.80%  | 0.63 | 1.59E-78 |
| KLF4     | HLA-DR+2 | 60.40%  | 71.90%  | 0.63 | 1.89E-78 |
| MBP      | HLA-DR+2 | 50.30%  | 15.80%  | 0.61 | 2.82E-78 |
| IL7R     | HLA-DR+2 | 29.50%  | 2.40%   | 0.63 | 2.85E-78 |
| GK       | HLA-DR+2 | 31.30%  | 7.60%   | 0.49 | 3.69E-78 |
| TMEM120B | HLA-DR+2 | 27.20%  | 3.70%   | 0.43 | 4.46E-78 |
| CTSH     | HLA-DR+2 | 67.10%  | 22.40%  | 0.60 | 6.80E-78 |
| CHD2     | HLA-DR+2 | 54.90%  | 32.00%  | 0.56 | 1.90E-77 |
| B2M      | HLA-DR+2 | 100.00% | 100.00% | 0.39 | 3.98E-77 |

|               |          |         |        |      |          |
|---------------|----------|---------|--------|------|----------|
| VMO1          | HLA-DR+2 | 35.50%  | 4.10%  | 0.66 | 4.92E-77 |
| CCRL2         | HLA-DR+2 | 33.40%  | 4.90%  | 0.53 | 9.15E-77 |
| PDGFB         | HLA-DR+2 | 34.20%  | 3.70%  | 0.51 | 3.66E-76 |
| TBXAS1        | HLA-DR+2 | 39.90%  | 5.70%  | 0.48 | 6.17E-76 |
| CD58          | HLA-DR+2 | 57.30%  | 38.30% | 0.49 | 1.60E-75 |
| IL23A         | HLA-DR+2 | 21.00%  | 0.80%  | 0.65 | 1.82E-74 |
| SFR1          | HLA-DR+2 | 28.20%  | 8.80%  | 0.44 | 3.23E-74 |
| TAGAP         | HLA-DR+2 | 30.80%  | 2.90%  | 0.53 | 3.77E-74 |
| SIPA1L1       | HLA-DR+2 | 45.60%  | 19.60% | 0.49 | 1.41E-73 |
| ARRB2         | HLA-DR+2 | 49.70%  | 11.90% | 0.58 | 1.45E-73 |
| TANK          | HLA-DR+2 | 61.40%  | 38.20% | 0.52 | 2.11E-73 |
| HSPA1A        | HLA-DR+2 | 51.00%  | 68.10% | 0.82 | 3.01E-73 |
| UPP1          | HLA-DR+2 | 56.50%  | 27.00% | 0.60 | 4.02E-73 |
| ZEB2          | HLA-DR+2 | 66.80%  | 49.10% | 0.56 | 4.73E-73 |
| FAM49B        | HLA-DR+2 | 55.20%  | 18.20% | 0.57 | 5.36E-73 |
| ADAM19        | HLA-DR+2 | 21.80%  | 2.50%  | 0.43 | 6.97E-73 |
| CD52          | HLA-DR+2 | 33.20%  | 4.20%  | 0.62 | 1.01E-72 |
| NSMAF         | HLA-DR+2 | 36.30%  | 9.70%  | 0.55 | 1.25E-72 |
| RUNX3         | HLA-DR+2 | 30.30%  | 3.00%  | 0.43 | 1.47E-72 |
| RASGRP3       | HLA-DR+2 | 34.20%  | 4.20%  | 0.50 | 1.63E-72 |
| MAFF          | HLA-DR+2 | 51.30%  | 26.80% | 0.56 | 1.76E-72 |
| ARL5B         | HLA-DR+2 | 40.70%  | 18.30% | 0.50 | 2.55E-72 |
| HLA-DOA       | HLA-DR+2 | 27.50%  | 2.00%  | 0.38 | 2.74E-72 |
| RP11-701P16.5 | HLA-DR+2 | 27.70%  | 2.20%  | 0.81 | 9.98E-72 |
| CSF3R         | HLA-DR+2 | 22.00%  | 0.90%  | 0.33 | 1.17E-71 |
| HLA-DQB2      | HLA-DR+2 | 17.90%  | 0.30%  | 0.28 | 1.89E-71 |
| GRB2          | HLA-DR+2 | 65.50%  | 39.30% | 0.52 | 2.62E-71 |
| EIF1          | HLA-DR+2 | 100.00% | 99.80% | 0.39 | 3.48E-71 |
| RASSF5        | HLA-DR+2 | 34.50%  | 5.20%  | 0.47 | 3.81E-71 |
| CSF1R         | HLA-DR+2 | 39.10%  | 7.00%  | 0.40 | 4.56E-71 |
| PTGS2         | HLA-DR+2 | 58.50%  | 28.00% | 0.91 | 6.63E-71 |
| CCL3L3        | HLA-DR+2 | 28.00%  | 2.20%  | 0.79 | 9.74E-71 |
| HCAR2         | HLA-DR+2 | 22.50%  | 1.20%  | 0.44 | 2.11E-70 |
| TPT1          | HLA-DR+2 | 99.70%  | 99.70% | 0.45 | 4.57E-70 |
| ARL4C         | HLA-DR+2 | 45.60%  | 17.80% | 0.65 | 6.05E-70 |
| ATP1B3        | HLA-DR+2 | 78.00%  | 70.10% | 0.53 | 1.04E-69 |
| CHMP1B        | HLA-DR+2 | 72.80%  | 63.70% | 0.61 | 1.64E-69 |
| PPP1R15B      | HLA-DR+2 | 50.50%  | 29.00% | 0.48 | 4.34E-69 |
| MS4A7         | HLA-DR+2 | 43.80%  | 8.40%  | 0.57 | 1.16E-68 |
| AHR           | HLA-DR+2 | 64.00%  | 36.50% | 0.63 | 2.15E-68 |
| CKLF          | HLA-DR+2 | 52.80%  | 36.50% | 0.49 | 2.87E-68 |



|            |          |        |        |      |          |
|------------|----------|--------|--------|------|----------|
| PELI1      | HLA-DR+2 | 48.40% | 26.40% | 0.63 | 2.95E-68 |
| HAVCR2     | HLA-DR+2 | 35.50% | 4.80%  | 0.46 | 4.20E-68 |
| DOK2       | HLA-DR+2 | 39.60% | 6.50%  | 0.54 | 2.79E-67 |
| LIMD2      | HLA-DR+2 | 25.60% | 2.30%  | 0.35 | 2.08E-66 |
| SYAP1      | HLA-DR+2 | 54.40% | 40.50% | 0.46 | 5.55E-66 |
| OSM        | HLA-DR+2 | 26.40% | 2.30%  | 0.49 | 7.72E-66 |
| COTL1      | HLA-DR+2 | 53.10% | 15.90% | 0.54 | 1.59E-65 |
| KDM6B      | HLA-DR+2 | 83.20% | 54.70% | 0.61 | 4.47E-65 |
| IFI30      | HLA-DR+2 | 35.50% | 6.20%  | 0.83 | 5.35E-65 |
| HSPA1B     | HLA-DR+2 | 36.50% | 54.60% | 0.72 | 5.65E-65 |
| SFPQ       | HLA-DR+2 | 78.00% | 64.20% | 0.51 | 1.52E-64 |
| YWHAZ      | HLA-DR+2 | 83.90% | 73.90% | 0.48 | 1.98E-64 |
| RNF144B    | HLA-DR+2 | 31.30% | 6.30%  | 0.52 | 3.67E-64 |
| DUSP2      | HLA-DR+2 | 32.60% | 5.10%  | 0.59 | 5.64E-64 |
| CECR1      | HLA-DR+2 | 39.10% | 7.60%  | 0.45 | 6.31E-64 |
| CLEC4E     | HLA-DR+2 | 20.70% | 1.00%  | 0.40 | 1.16E-63 |
| TNFSF13B   | HLA-DR+2 | 40.40% | 8.50%  | 0.51 | 1.30E-63 |
| KMO        | HLA-DR+2 | 22.30% | 1.30%  | 0.39 | 1.75E-63 |
| CLN8       | HLA-DR+2 | 42.20% | 20.30% | 0.48 | 2.42E-63 |
| ICAM1      | HLA-DR+2 | 70.50% | 38.10% | 0.71 | 4.93E-63 |
| BACH1      | HLA-DR+2 | 46.10% | 24.90% | 0.47 | 7.06E-63 |
| ADA        | HLA-DR+2 | 29.50% | 7.90%  | 0.48 | 8.39E-63 |
| VEGFA      | HLA-DR+2 | 48.40% | 21.60% | 0.53 | 8.72E-63 |
| MIR181A1HG | HLA-DR+2 | 22.50% | 1.70%  | 0.35 | 1.28E-62 |
| MAP2K1     | HLA-DR+2 | 43.00% | 17.30% | 0.49 | 1.59E-62 |
| SPAG9      | HLA-DR+2 | 71.80% | 61.30% | 0.47 | 2.03E-62 |
| NRP2       | HLA-DR+2 | 54.90% | 32.90% | 0.57 | 3.48E-62 |
| GPR84      | HLA-DR+2 | 23.30% | 1.60%  | 0.34 | 4.48E-62 |
| MGAT1      | HLA-DR+2 | 72.30% | 62.70% | 0.43 | 6.70E-62 |
| CD69       | HLA-DR+2 | 24.60% | 3.10%  | 0.28 | 2.86E-61 |
| RAB11FIP1  | HLA-DR+2 | 30.80% | 4.40%  | 0.50 | 1.03E-60 |
| RPS16      | HLA-DR+2 | 99.70% | 99.40% | 0.38 | 1.08E-60 |
| DNAJB1     | HLA-DR+2 | 59.10% | 83.50% | 0.32 | 1.60E-60 |
| TLR2       | HLA-DR+2 | 31.60% | 6.30%  | 0.45 | 3.12E-60 |
| NABP1      | HLA-DR+2 | 50.30% | 20.80% | 0.54 | 3.66E-60 |
| IL18       | HLA-DR+2 | 32.40% | 4.30%  | 0.43 | 3.91E-60 |
| RAC2       | HLA-DR+2 | 29.30% | 4.20%  | 0.33 | 4.71E-60 |
| LPAR6      | HLA-DR+2 | 35.50% | 7.80%  | 0.64 | 5.56E-60 |
| TNFAIP2    | HLA-DR+2 | 69.40% | 50.10% | 0.61 | 8.96E-60 |
| HCAR3      | HLA-DR+2 | 17.90% | 0.70%  | 0.34 | 8.99E-60 |
| YME1L1     | HLA-DR+2 | 55.70% | 45.30% | 0.44 | 1.48E-59 |

|               |          |         |        |      |          |
|---------------|----------|---------|--------|------|----------|
| CKS2          | HLA-DR+2 | 52.80%  | 53.90% | 0.48 | 2.18E-59 |
| RPS10         | HLA-DR+2 | 97.90%  | 96.00% | 0.43 | 3.77E-59 |
| PRMT10        | HLA-DR+2 | 24.60%  | 6.00%  | 0.47 | 4.25E-59 |
| SGK1          | HLA-DR+2 | 77.50%  | 73.60% | 0.69 | 1.33E-58 |
| RPS21         | HLA-DR+2 | 100.00% | 98.60% | 0.40 | 1.43E-58 |
| ITGAX         | HLA-DR+2 | 25.10%  | 2.60%  | 0.37 | 2.18E-58 |
| RGS2          | HLA-DR+2 | 75.10%  | 59.00% | 0.87 | 1.45E-57 |
| NCF2          | HLA-DR+2 | 31.90%  | 4.60%  | 0.39 | 2.06E-57 |
| RP11-1143G9.4 | HLA-DR+2 | 29.30%  | 3.80%  | 0.51 | 2.91E-57 |
| STK17B        | HLA-DR+2 | 49.70%  | 16.10% | 0.57 | 3.89E-57 |
| FAM49A        | HLA-DR+2 | 49.70%  | 28.90% | 0.46 | 4.78E-57 |
| KB-1507C5.4   | HLA-DR+2 | 18.40%  | 0.80%  | 0.28 | 5.80E-57 |
| RAB9A         | HLA-DR+2 | 28.80%  | 23.70% | 0.36 | 6.44E-57 |
| IL2RG         | HLA-DR+2 | 21.80%  | 2.00%  | 0.27 | 1.48E-56 |
| SOD2          | HLA-DR+2 | 93.00%  | 86.60% | 0.97 | 1.82E-56 |
| HCK           | HLA-DR+2 | 31.60%  | 4.50%  | 0.39 | 2.75E-56 |
| CD44          | HLA-DR+2 | 96.60%  | 90.00% | 0.51 | 3.58E-56 |
| CYBB          | HLA-DR+2 | 37.60%  | 10.10% | 0.28 | 5.81E-56 |
| ST3GAL6       | HLA-DR+2 | 29.30%  | 4.10%  | 0.41 | 6.24E-56 |
| FPR3          | HLA-DR+2 | 35.20%  | 7.00%  | 0.39 | 6.48E-56 |
| LILRB2        | HLA-DR+2 | 28.00%  | 3.20%  | 0.38 | 6.63E-56 |
| RAPGEF1       | HLA-DR+2 | 35.80%  | 11.00% | 0.42 | 9.29E-56 |
| KLF6          | HLA-DR+2 | 91.50%  | 79.90% | 0.69 | 1.74E-55 |
| ZFYVE16       | HLA-DR+2 | 38.90%  | 19.10% | 0.42 | 6.17E-55 |
| JARID2        | HLA-DR+2 | 33.20%  | 10.70% | 0.42 | 1.29E-54 |
| CXorf21       | HLA-DR+2 | 16.80%  | 0.60%  | 0.27 | 2.13E-54 |
| RPL36A        | HLA-DR+2 | 98.40%  | 94.50% | 0.48 | 3.28E-54 |
| WAS           | HLA-DR+2 | 26.40%  | 3.30%  | 0.29 | 3.46E-54 |
| SLAMF7        | HLA-DR+2 | 14.50%  | 0.40%  | 0.28 | 9.42E-54 |
| TRA2B         | HLA-DR+2 | 68.90%  | 61.00% | 0.50 | 1.60E-53 |
| GLA           | HLA-DR+2 | 51.80%  | 36.10% | 0.47 | 4.92E-53 |
| PLK3          | HLA-DR+2 | 44.60%  | 23.50% | 0.48 | 8.35E-53 |
| PID1          | HLA-DR+2 | 40.40%  | 23.60% | 0.42 | 1.33E-52 |
| PNP           | HLA-DR+2 | 56.70%  | 39.30% | 0.47 | 1.68E-52 |
| YPEL5         | HLA-DR+2 | 58.00%  | 60.40% | 0.34 | 1.79E-52 |
| PHLDA2        | HLA-DR+2 | 64.50%  | 55.30% | 0.64 | 2.27E-52 |
| CTB-58E17.1   | HLA-DR+2 | 25.60%  | 5.70%  | 0.34 | 3.44E-52 |
| AKIRIN2       | HLA-DR+2 | 43.80%  | 32.50% | 0.35 | 4.36E-52 |
| CST7          | HLA-DR+2 | 23.10%  | 2.10%  | 0.48 | 1.12E-51 |
| SH2B3         | HLA-DR+2 | 43.50%  | 13.50% | 0.48 | 2.38E-51 |
| MT-CO1        | HLA-DR+2 | 100.00% | 99.50% | 0.43 | 2.73E-51 |

|               |          |         |        |      |          |
|---------------|----------|---------|--------|------|----------|
| RPS19         | HLA-DR+2 | 99.70%  | 99.50% | 0.35 | 7.08E-51 |
| STMN1         | HLA-DR+2 | 47.20%  | 15.60% | 0.59 | 1.02E-50 |
| MARCKSL1      | HLA-DR+2 | 43.50%  | 17.70% | 0.50 | 1.43E-50 |
| CD300A        | HLA-DR+2 | 24.10%  | 2.40%  | 0.33 | 1.44E-50 |
| SERPINB8      | HLA-DR+2 | 38.60%  | 16.10% | 0.40 | 1.54E-49 |
| RP11-386I14.4 | HLA-DR+2 | 27.70%  | 6.70%  | 0.55 | 7.76E-49 |
| MSR1          | HLA-DR+2 | 37.30%  | 8.70%  | 0.43 | 1.03E-48 |
| WSB1          | HLA-DR+2 | 70.50%  | 68.30% | 0.43 | 2.58E-48 |
| FAU           | HLA-DR+2 | 100.00% | 99.50% | 0.31 | 3.53E-48 |
| NEU1          | HLA-DR+2 | 46.40%  | 51.10% | 0.32 | 5.50E-48 |
| IKZF1         | HLA-DR+2 | 20.20%  | 1.90%  | 0.26 | 1.23E-47 |
| RP11-58E21.3  | HLA-DR+2 | 19.20%  | 2.70%  | 0.30 | 2.26E-47 |
| IQGAP2        | HLA-DR+2 | 29.00%  | 4.50%  | 0.39 | 2.57E-47 |
| ARID3A        | HLA-DR+2 | 27.50%  | 4.50%  | 0.39 | 2.88E-47 |
| ATP1B1        | HLA-DR+2 | 44.30%  | 22.00% | 0.49 | 3.62E-47 |
| SEMA6B        | HLA-DR+2 | 23.10%  | 3.40%  | 0.32 | 3.87E-47 |
| GLRX          | HLA-DR+2 | 72.00%  | 64.60% | 0.62 | 4.06E-47 |
| MMP19         | HLA-DR+2 | 23.60%  | 15.80% | 0.38 | 4.99E-47 |
| NFE2L2        | HLA-DR+2 | 87.30%  | 78.60% | 0.49 | 5.41E-47 |
| RAB8B         | HLA-DR+2 | 40.70%  | 18.90% | 0.40 | 7.57E-47 |
| FAM107B       | HLA-DR+2 | 45.90%  | 30.20% | 0.41 | 8.91E-47 |
| RPL28         | HLA-DR+2 | 100.00% | 99.70% | 0.35 | 9.88E-47 |
| PPT1          | HLA-DR+2 | 63.70%  | 49.60% | 0.45 | 1.06E-46 |
| ARHGAP26      | HLA-DR+2 | 26.70%  | 4.70%  | 0.35 | 2.09E-46 |
| TFEC          | HLA-DR+2 | 23.60%  | 2.80%  | 0.31 | 2.61E-46 |
| ARPC3         | HLA-DR+2 | 92.70%  | 87.40% | 0.41 | 2.99E-46 |
| NUMB          | HLA-DR+2 | 42.70%  | 26.10% | 0.40 | 4.74E-46 |
| RNF145        | HLA-DR+2 | 46.90%  | 29.80% | 0.43 | 5.90E-46 |
| PLEKHF2       | HLA-DR+2 | 27.70%  | 8.70%  | 0.35 | 8.07E-46 |
| LGALS9        | HLA-DR+2 | 32.40%  | 7.00%  | 0.35 | 3.19E-45 |
| THBS1         | HLA-DR+2 | 20.20%  | 17.70% | 0.58 | 4.09E-45 |
| FGL2          | HLA-DR+2 | 56.70%  | 24.80% | 0.60 | 4.66E-45 |
| SNHG15        | HLA-DR+2 | 45.60%  | 36.90% | 0.38 | 4.86E-45 |
| ATP6V0D1      | HLA-DR+2 | 66.10%  | 52.80% | 0.40 | 9.78E-45 |
| DBI           | HLA-DR+2 | 89.90%  | 83.70% | 0.43 | 1.97E-44 |
| SNX10         | HLA-DR+2 | 31.90%  | 6.40%  | 0.39 | 2.69E-44 |
| NRIP3         | HLA-DR+2 | 26.90%  | 10.90% | 0.35 | 2.98E-44 |
| JMJD1C        | HLA-DR+2 | 64.80%  | 59.80% | 0.41 | 2.00E-43 |
| HMHA1         | HLA-DR+2 | 25.40%  | 4.00%  | 0.30 | 2.49E-43 |
| FERMT3        | HLA-DR+2 | 36.30%  | 9.20%  | 0.41 | 3.42E-43 |
| PTGER2        | HLA-DR+2 | 38.10%  | 28.70% | 0.40 | 3.57E-43 |

|              |          |        |        |      |          |
|--------------|----------|--------|--------|------|----------|
| ATF5         | HLA-DR+2 | 30.60% | 10.40% | 0.35 | 3.74E-43 |
| ARF6         | HLA-DR+2 | 43.50% | 27.60% | 0.43 | 4.96E-43 |
| PIK3R5       | HLA-DR+2 | 24.10% | 3.50%  | 0.28 | 5.18E-43 |
| NBPF10       | HLA-DR+2 | 47.90% | 30.60% | 0.43 | 1.25E-42 |
| CXCL5        | HLA-DR+2 | 17.10% | 1.60%  | 0.86 | 2.05E-42 |
| RP11-796E2.4 | HLA-DR+2 | 19.70% | 2.40%  | 0.33 | 2.40E-42 |
| PIM2         | HLA-DR+2 | 22.50% | 6.10%  | 0.39 | 2.55E-42 |
| RHOH         | HLA-DR+2 | 19.20% | 2.10%  | 0.28 | 7.26E-42 |
| C10orf128    | HLA-DR+2 | 24.10% | 3.60%  | 0.34 | 1.10E-41 |
| TYMP         | HLA-DR+2 | 53.90% | 33.40% | 0.52 | 1.60E-41 |
| IGSF6        | HLA-DR+2 | 25.40% | 4.70%  | 0.28 | 1.77E-41 |
| CDKN1A       | HLA-DR+2 | 95.60% | 82.80% | 0.49 | 2.85E-41 |
| SNORD3B-2    | HLA-DR+2 | 18.90% | 3.80%  | 0.28 | 5.24E-41 |
| CCDC88A      | HLA-DR+2 | 52.60% | 27.90% | 0.45 | 2.86E-40 |
| MARCKS       | HLA-DR+2 | 47.90% | 29.20% | 0.55 | 5.39E-40 |
| ZNF706       | HLA-DR+2 | 65.30% | 65.70% | 0.30 | 5.98E-40 |
| RP11-356I2.4 | HLA-DR+2 | 19.20% | 2.20%  | 0.26 | 7.20E-40 |
| UBE2D3       | HLA-DR+2 | 90.20% | 84.80% | 0.36 | 1.43E-39 |
| RIN3         | HLA-DR+2 | 26.70% | 5.00%  | 0.31 | 1.48E-39 |
| ZBTB43       | HLA-DR+2 | 43.80% | 30.90% | 0.36 | 1.52E-39 |
| CYTH1        | HLA-DR+2 | 42.00% | 18.00% | 0.40 | 1.65E-39 |
| CSGALNACT2   | HLA-DR+2 | 38.60% | 22.80% | 0.35 | 3.79E-39 |
| STXB2        | HLA-DR+2 | 25.10% | 4.10%  | 0.28 | 5.09E-39 |
| NCF4         | HLA-DR+2 | 26.40% | 5.00%  | 0.28 | 5.50E-39 |
| PDE4DIP      | HLA-DR+2 | 55.70% | 56.40% | 0.32 | 7.70E-39 |
| ALOX5        | HLA-DR+2 | 21.80% | 3.10%  | 0.25 | 1.58E-38 |
| ETF1         | HLA-DR+2 | 65.30% | 51.90% | 0.36 | 1.73E-38 |
| CASP1        | HLA-DR+2 | 29.00% | 8.70%  | 0.36 | 2.14E-38 |
| HOTAIRM1     | HLA-DR+2 | 29.80% | 14.10% | 0.33 | 7.62E-38 |
| MCTP1        | HLA-DR+2 | 26.70% | 5.80%  | 0.27 | 8.80E-38 |
| PTGER4       | HLA-DR+2 | 38.90% | 21.80% | 0.42 | 9.32E-38 |
| HSPH1        | HLA-DR+2 | 42.20% | 51.00% | 0.27 | 1.28E-37 |
| SLC25A19     | HLA-DR+2 | 27.70% | 8.10%  | 0.32 | 3.88E-37 |
| ZFAND5       | HLA-DR+2 | 54.40% | 51.30% | 0.33 | 4.07E-37 |
| CLEC2B       | HLA-DR+2 | 44.30% | 15.70% | 0.53 | 9.43E-37 |
| FBP1         | HLA-DR+2 | 23.30% | 4.00%  | 0.26 | 9.88E-37 |
| NFAT5        | HLA-DR+2 | 54.90% | 39.30% | 0.36 | 1.20E-36 |
| DENND5A      | HLA-DR+2 | 36.80% | 23.00% | 0.31 | 1.55E-36 |
| HLA-C        | HLA-DR+2 | 98.70% | 97.40% | 0.51 | 2.01E-36 |
| NR4A3        | HLA-DR+2 | 46.10% | 24.30% | 0.46 | 4.33E-36 |
| FAM26F       | HLA-DR+2 | 22.30% | 3.50%  | 0.29 | 6.20E-36 |

|          |          |         |        |      |          |
|----------|----------|---------|--------|------|----------|
| ANTXR2   | HLA-DR+2 | 44.00%  | 28.30% | 0.37 | 6.61E-36 |
| RPLP1    | HLA-DR+2 | 100.00% | 99.80% | 0.27 | 1.07E-35 |
| IFNGR2   | HLA-DR+2 | 42.50%  | 28.50% | 0.35 | 1.57E-35 |
| GNA13    | HLA-DR+2 | 37.00%  | 15.60% | 0.35 | 1.66E-35 |
| MAP4K4   | HLA-DR+2 | 30.30%  | 16.50% | 0.33 | 3.63E-35 |
| LACTB    | HLA-DR+2 | 36.00%  | 18.40% | 0.37 | 3.75E-35 |
| LRRFIP1  | HLA-DR+2 | 79.80%  | 63.90% | 0.46 | 5.61E-35 |
| ZC3H12A  | HLA-DR+2 | 60.10%  | 44.60% | 0.42 | 6.90E-35 |
| CLK1     | HLA-DR+2 | 61.40%  | 59.90% | 0.33 | 1.54E-34 |
| LYPD3    | HLA-DR+2 | 10.60%  | 3.40%  | 0.27 | 1.71E-34 |
| BNIP3L   | HLA-DR+2 | 60.40%  | 60.60% | 0.29 | 1.81E-34 |
| HERPUD1  | HLA-DR+2 | 76.40%  | 87.30% | 0.27 | 2.08E-34 |
| DUSP6    | HLA-DR+2 | 42.00%  | 17.50% | 0.50 | 2.68E-34 |
| MAP1LC3B | HLA-DR+2 | 82.10%  | 82.50% | 0.34 | 2.74E-34 |
| ALDH2    | HLA-DR+2 | 58.80%  | 39.20% | 0.41 | 3.34E-34 |
| SLC31A2  | HLA-DR+2 | 39.40%  | 23.40% | 0.34 | 3.37E-34 |
| RAB7A    | HLA-DR+2 | 83.90%  | 82.90% | 0.31 | 3.43E-34 |
| ST8SIA4  | HLA-DR+2 | 25.90%  | 5.80%  | 0.33 | 5.25E-34 |
| STK10    | HLA-DR+2 | 24.60%  | 7.20%  | 0.28 | 1.16E-33 |
| ATP1A1   | HLA-DR+2 | 76.70%  | 71.10% | 0.35 | 1.52E-33 |
| SLC43A2  | HLA-DR+2 | 33.90%  | 12.30% | 0.39 | 1.74E-33 |
| ARHGAP30 | HLA-DR+2 | 25.10%  | 4.90%  | 0.31 | 1.77E-33 |
| RGS10    | HLA-DR+2 | 67.90%  | 50.30% | 0.40 | 3.31E-33 |
| SRSF2    | HLA-DR+2 | 88.10%  | 83.70% | 0.37 | 3.89E-33 |
| MYO9B    | HLA-DR+2 | 31.10%  | 13.10% | 0.32 | 4.01E-33 |
| PAK1     | HLA-DR+2 | 31.60%  | 11.10% | 0.33 | 6.02E-33 |
| IRF7     | HLA-DR+2 | 32.90%  | 24.10% | 0.31 | 9.20E-33 |
| H2AFZ    | HLA-DR+2 | 93.80%  | 91.00% | 0.49 | 1.18E-32 |
| EIF4A3   | HLA-DR+2 | 71.20%  | 68.00% | 0.43 | 1.91E-32 |
| ARL6IP1  | HLA-DR+2 | 75.90%  | 65.80% | 0.39 | 2.53E-32 |
| RELT     | HLA-DR+2 | 23.80%  | 6.10%  | 0.26 | 3.02E-32 |
| LILRB4   | HLA-DR+2 | 23.80%  | 4.70%  | 0.27 | 4.46E-32 |
| TP53BP2  | HLA-DR+2 | 27.20%  | 13.70% | 0.29 | 4.56E-32 |
| MAPKAPK2 | HLA-DR+2 | 44.80%  | 28.80% | 0.32 | 5.16E-32 |
| SKIL     | HLA-DR+2 | 65.00%  | 52.50% | 0.39 | 6.21E-32 |
| PILRA    | HLA-DR+2 | 23.30%  | 4.50%  | 0.26 | 6.74E-32 |
| CEP170   | HLA-DR+2 | 35.80%  | 20.40% | 0.33 | 1.05E-31 |
| PDE4A    | HLA-DR+2 | 32.10%  | 13.10% | 0.33 | 1.28E-31 |
| RPS24    | HLA-DR+2 | 100.00% | 99.70% | 0.29 | 1.46E-31 |
| CYCS     | HLA-DR+2 | 90.90%  | 81.40% | 0.42 | 1.49E-31 |
| IER5     | HLA-DR+2 | 37.00%  | 17.20% | 0.39 | 2.02E-31 |

|         |          |         |        |      |          |
|---------|----------|---------|--------|------|----------|
| ARFGAP3 | HLA-DR+2 | 49.20%  | 40.30% | 0.30 | 2.16E-31 |
| PPP2CA  | HLA-DR+2 | 57.00%  | 46.50% | 0.32 | 2.30E-31 |
| CXCR3   | HLA-DR+2 | 16.60%  | 2.50%  | 0.33 | 2.78E-31 |
| RNF213  | HLA-DR+2 | 21.20%  | 31.90% | 0.26 | 4.64E-31 |
| SRC     | HLA-DR+2 | 20.20%  | 6.30%  | 0.26 | 4.83E-31 |
| BIN2    | HLA-DR+2 | 19.70%  | 2.90%  | 0.25 | 5.26E-31 |
| BST2    | HLA-DR+2 | 56.00%  | 27.50% | 0.27 | 7.55E-31 |
| FTL     | HLA-DR+2 | 100.00% | 99.80% | 0.33 | 1.36E-30 |
| TM6SF1  | HLA-DR+2 | 20.70%  | 3.30%  | 0.26 | 1.38E-30 |
| ZFAND2A | HLA-DR+2 | 31.60%  | 26.20% | 0.29 | 1.40E-30 |
| SLC7A5  | HLA-DR+2 | 34.70%  | 22.80% | 0.35 | 1.93E-30 |
| ICAM3   | HLA-DR+2 | 25.10%  | 17.00% | 0.27 | 2.93E-30 |
| EEF1B2  | HLA-DR+2 | 98.20%  | 94.80% | 0.35 | 3.35E-30 |
| TPRA1   | HLA-DR+2 | 32.40%  | 19.30% | 0.29 | 4.48E-30 |
| FYB     | HLA-DR+2 | 27.50%  | 7.10%  | 0.30 | 8.56E-30 |
| RP2     | HLA-DR+2 | 24.40%  | 8.50%  | 0.29 | 9.50E-30 |
| FILIP1L | HLA-DR+2 | 54.90%  | 43.00% | 0.51 | 1.15E-29 |
| EVI2A   | HLA-DR+2 | 39.10%  | 14.50% | 0.33 | 1.16E-29 |
| VMP1    | HLA-DR+2 | 62.70%  | 59.40% | 0.34 | 1.28E-29 |
| IRAK2   | HLA-DR+2 | 31.30%  | 14.20% | 0.28 | 1.60E-29 |
| RB1     | HLA-DR+2 | 37.00%  | 19.60% | 0.35 | 2.36E-29 |
| NFKBIE  | HLA-DR+2 | 21.50%  | 6.10%  | 0.26 | 3.08E-29 |
| USP12   | HLA-DR+2 | 32.40%  | 20.60% | 0.29 | 6.52E-29 |
| DENND1B | HLA-DR+2 | 24.90%  | 8.70%  | 0.28 | 8.59E-29 |
| RPS27   | HLA-DR+2 | 100.00% | 99.90% | 0.26 | 1.03E-28 |
| SKAP2   | HLA-DR+2 | 30.60%  | 9.60%  | 0.27 | 1.50E-28 |
| RPL27   | HLA-DR+2 | 100.00% | 99.10% | 0.26 | 1.50E-28 |
| IFNGR1  | HLA-DR+2 | 49.00%  | 45.10% | 0.28 | 1.76E-28 |
| PLEKHB2 | HLA-DR+2 | 46.90%  | 32.60% | 0.33 | 1.92E-28 |
| RPL23   | HLA-DR+2 | 100.00% | 99.10% | 0.28 | 2.06E-28 |
| ENTPD1  | HLA-DR+2 | 29.30%  | 7.90%  | 0.29 | 2.42E-28 |
| GLS     | HLA-DR+2 | 43.50%  | 35.50% | 0.29 | 2.56E-28 |
| PIK3AP1 | HLA-DR+2 | 20.70%  | 3.60%  | 0.28 | 2.82E-28 |
| DOCK8   | HLA-DR+2 | 22.80%  | 5.70%  | 0.26 | 2.85E-28 |
| C1QC    | HLA-DR+2 | 37.80%  | 15.40% | 0.31 | 3.23E-28 |
| SNHG12  | HLA-DR+2 | 29.00%  | 26.60% | 0.31 | 3.89E-28 |
| EDEM1   | HLA-DR+2 | 29.00%  | 11.30% | 0.28 | 4.91E-28 |
| PFN1    | HLA-DR+2 | 97.20%  | 96.00% | 0.36 | 5.48E-28 |
| FNIP2   | HLA-DR+2 | 45.60%  | 43.40% | 0.34 | 8.08E-28 |
| ATP6VOB | HLA-DR+2 | 81.60%  | 76.00% | 0.33 | 1.43E-27 |
| CDC42   | HLA-DR+2 | 87.30%  | 77.70% | 0.36 | 2.20E-27 |

|          |          |        |        |      |          |
|----------|----------|--------|--------|------|----------|
| MAPK6    | HLA-DR+2 | 45.10% | 31.80% | 0.32 | 6.95E-27 |
| CD93     | HLA-DR+2 | 22.00% | 4.70%  | 0.27 | 7.32E-27 |
| C3orf58  | HLA-DR+2 | 24.10% | 17.40% | 0.27 | 7.33E-27 |
| SYNGR2   | HLA-DR+2 | 37.30% | 18.20% | 0.37 | 8.81E-27 |
| SNN      | HLA-DR+2 | 21.20% | 6.30%  | 0.26 | 1.07E-26 |
| ZBTB1    | HLA-DR+2 | 34.20% | 18.70% | 0.32 | 1.18E-26 |
| PABPC4   | HLA-DR+2 | 42.20% | 28.60% | 0.33 | 1.49E-26 |
| HIVEP2   | HLA-DR+2 | 35.20% | 27.90% | 0.26 | 1.97E-26 |
| TAB2     | HLA-DR+2 | 30.60% | 17.70% | 0.27 | 2.08E-26 |
| RPS7     | HLA-DR+2 | 99.50% | 99.00% | 0.28 | 2.65E-26 |
| CYLD     | HLA-DR+2 | 44.30% | 32.10% | 0.31 | 4.51E-26 |
| PFKFB3   | HLA-DR+2 | 44.60% | 30.20% | 0.35 | 4.82E-26 |
| SLC3A2   | HLA-DR+2 | 78.50% | 75.80% | 0.39 | 5.86E-26 |
| MED13    | HLA-DR+2 | 33.90% | 25.30% | 0.26 | 1.28E-25 |
| RIPK2    | HLA-DR+2 | 35.80% | 25.10% | 0.28 | 1.34E-25 |
| DENND4A  | HLA-DR+2 | 22.80% | 8.60%  | 0.26 | 1.67E-25 |
| C9orf72  | HLA-DR+2 | 20.70% | 5.70%  | 0.26 | 1.95E-25 |
| HNRNPU   | HLA-DR+2 | 70.50% | 67.50% | 0.30 | 3.58E-25 |
| ATP6V1B2 | HLA-DR+2 | 48.70% | 38.40% | 0.31 | 4.12E-25 |
| VIM-AS1  | HLA-DR+2 | 26.70% | 12.20% | 0.27 | 6.81E-25 |
| ARHGEF2  | HLA-DR+2 | 38.60% | 24.20% | 0.29 | 7.67E-25 |
| SUB1     | HLA-DR+2 | 85.50% | 82.20% | 0.30 | 2.24E-24 |
| PPP1R2   | HLA-DR+2 | 47.70% | 39.00% | 0.27 | 2.71E-24 |
| ITSN2    | HLA-DR+2 | 47.70% | 33.50% | 0.31 | 3.81E-24 |
| MTHFD2   | HLA-DR+2 | 60.10% | 47.80% | 0.37 | 5.33E-24 |
| IFRD1    | HLA-DR+2 | 62.40% | 59.70% | 0.32 | 5.40E-24 |
| LIMS1    | HLA-DR+2 | 60.90% | 59.00% | 0.26 | 5.99E-24 |
| ATF3     | HLA-DR+2 | 67.60% | 69.30% | 0.45 | 8.12E-24 |
| H2AFY    | HLA-DR+2 | 54.40% | 44.10% | 0.27 | 9.26E-24 |
| ELF1     | HLA-DR+2 | 62.20% | 51.70% | 0.32 | 1.02E-23 |
| TPM3     | HLA-DR+2 | 76.90% | 72.50% | 0.33 | 1.04E-23 |
| RAP2B    | HLA-DR+2 | 26.90% | 11.80% | 0.32 | 1.37E-23 |
| LYN      | HLA-DR+2 | 25.60% | 9.60%  | 0.26 | 1.57E-23 |
| CHMP4B   | HLA-DR+2 | 65.80% | 61.70% | 0.26 | 3.50E-23 |
| RCSD1    | HLA-DR+2 | 20.50% | 4.20%  | 0.28 | 4.02E-23 |
| CPM      | HLA-DR+2 | 31.30% | 10.70% | 0.31 | 6.21E-23 |
| ACSL1    | HLA-DR+2 | 27.20% | 12.00% | 0.29 | 7.14E-23 |
| MARCH1   | HLA-DR+2 | 18.10% | 3.50%  | 0.29 | 2.71E-22 |
| PEA15    | HLA-DR+2 | 60.90% | 53.70% | 0.28 | 2.79E-22 |
| TAOK3    | HLA-DR+2 | 46.40% | 35.80% | 0.28 | 3.24E-22 |
| POU2F2   | HLA-DR+2 | 23.10% | 6.80%  | 0.29 | 3.79E-22 |

|              |          |         |        |      |          |
|--------------|----------|---------|--------|------|----------|
| HLA-A        | HLA-DR+2 | 99.00%  | 98.20% | 0.28 | 4.42E-22 |
| TGIF1        | HLA-DR+2 | 59.10%  | 46.80% | 0.35 | 4.51E-22 |
| MAPRE1       | HLA-DR+2 | 54.70%  | 43.70% | 0.27 | 5.15E-22 |
| NFKBIZ       | HLA-DR+2 | 71.80%  | 60.20% | 0.39 | 8.34E-22 |
| FAM105A      | HLA-DR+2 | 22.80%  | 6.20%  | 0.26 | 1.05E-21 |
| MEF2C        | HLA-DR+2 | 44.30%  | 21.30% | 0.37 | 1.16E-21 |
| RPL38        | HLA-DR+2 | 100.00% | 99.20% | 0.25 | 1.24E-21 |
| TPP1         | HLA-DR+2 | 50.50%  | 33.30% | 0.31 | 2.29E-21 |
| TGFB1        | HLA-DR+2 | 54.40%  | 43.20% | 0.30 | 3.23E-21 |
| MIS18BP1     | HLA-DR+2 | 25.90%  | 18.50% | 0.28 | 3.82E-21 |
| SERPINA1     | HLA-DR+2 | 32.40%  | 13.10% | 0.30 | 4.48E-21 |
| DDIT4        | HLA-DR+2 | 71.80%  | 60.90% | 0.41 | 5.82E-21 |
| VOPP1        | HLA-DR+2 | 35.00%  | 21.90% | 0.28 | 7.39E-21 |
| RPS2         | HLA-DR+2 | 100.00% | 99.60% | 0.27 | 8.80E-21 |
| SLC25A5      | HLA-DR+2 | 84.20%  | 80.80% | 0.29 | 9.49E-21 |
| FOSL2        | HLA-DR+2 | 49.50%  | 39.60% | 0.29 | 9.60E-21 |
| EPB41L3      | HLA-DR+2 | 37.80%  | 27.10% | 0.29 | 1.07E-20 |
| BIRC2        | HLA-DR+2 | 47.20%  | 40.00% | 0.26 | 1.73E-20 |
| USP53        | HLA-DR+2 | 48.20%  | 41.30% | 0.28 | 2.68E-20 |
| NUP214       | HLA-DR+2 | 26.40%  | 10.70% | 0.26 | 2.87E-20 |
| RP11-138A9.1 | HLA-DR+2 | 39.10%  | 26.50% | 0.29 | 8.89E-20 |
| SERP1        | HLA-DR+2 | 83.70%  | 78.20% | 0.28 | 1.71E-19 |
| CD14         | HLA-DR+2 | 52.60%  | 33.00% | 0.32 | 1.88E-19 |
| TOP1         | HLA-DR+2 | 58.30%  | 53.90% | 0.27 | 2.83E-19 |
| RPPH1        | HLA-DR+2 | 18.40%  | 5.50%  | 0.28 | 2.83E-19 |
| AC016831.7   | HLA-DR+2 | 24.60%  | 11.40% | 0.25 | 3.75E-19 |
| ZFAS1        | HLA-DR+2 | 91.20%  | 90.20% | 0.30 | 4.54E-19 |
| ABCA1        | HLA-DR+2 | 29.50%  | 17.80% | 0.31 | 5.07E-19 |
| DUSP1        | HLA-DR+2 | 66.80%  | 56.30% | 0.44 | 6.99E-19 |
| CDC42SE1     | HLA-DR+2 | 46.10%  | 31.00% | 0.34 | 7.08E-19 |
| PPP1CB       | HLA-DR+2 | 63.70%  | 58.40% | 0.28 | 8.85E-19 |
| ZNF331       | HLA-DR+2 | 37.80%  | 24.20% | 0.44 | 9.51E-19 |
| DDX5         | HLA-DR+2 | 99.50%  | 98.00% | 0.31 | 1.01E-18 |
| CSTB         | HLA-DR+2 | 82.90%  | 82.20% | 0.32 | 1.03E-18 |
| RASSF4       | HLA-DR+2 | 21.80%  | 6.30%  | 0.26 | 1.08E-18 |
| CLEC12A      | HLA-DR+2 | 26.40%  | 9.30%  | 0.26 | 1.15E-18 |
| LRR8C        | HLA-DR+2 | 30.60%  | 18.40% | 0.27 | 1.31E-18 |
| MTSS1        | HLA-DR+2 | 31.30%  | 15.90% | 0.28 | 2.31E-18 |
| CSRNP1       | HLA-DR+2 | 60.90%  | 56.60% | 0.28 | 2.38E-18 |
| MFSD2A       | HLA-DR+2 | 37.80%  | 24.50% | 0.29 | 2.62E-18 |
| C3AR1        | HLA-DR+2 | 22.30%  | 6.10%  | 0.27 | 3.15E-18 |



|              |          |        |        |      |          |
|--------------|----------|--------|--------|------|----------|
| RBM8A        | HLA-DR+2 | 83.70% | 78.60% | 0.27 | 3.90E-18 |
| PYCARD       | HLA-DR+2 | 48.70% | 30.70% | 0.29 | 4.24E-18 |
| RNF130       | HLA-DR+2 | 67.10% | 57.50% | 0.27 | 6.28E-18 |
| WTAP         | HLA-DR+2 | 63.50% | 57.60% | 0.38 | 1.03E-17 |
| RP1-31316.12 | HLA-DR+2 | 15.50% | 5.10%  | 0.25 | 1.25E-17 |
| NAP1L1       | HLA-DR+2 | 91.20% | 87.80% | 0.28 | 1.85E-17 |
| TIPARP       | HLA-DR+2 | 66.10% | 50.70% | 0.34 | 2.66E-17 |
| CAPZA1       | HLA-DR+2 | 49.00% | 37.90% | 0.26 | 2.84E-17 |
| MTRNR2L1     | HLA-DR+2 | 39.60% | 19.60% | 0.44 | 4.75E-17 |
| CD4          | HLA-DR+2 | 33.70% | 15.40% | 0.31 | 8.66E-17 |
| OTUD1        | HLA-DR+2 | 21.80% | 7.80%  | 0.26 | 1.17E-16 |
| KCNN4        | HLA-DR+2 | 33.70% | 19.30% | 0.27 | 1.42E-16 |
| HSPA6        | HLA-DR+2 | 21.50% | 6.10%  | 0.43 | 2.07E-16 |
| TLE4         | HLA-DR+2 | 47.20% | 42.60% | 0.26 | 2.36E-16 |
| IER2         | HLA-DR+2 | 71.50% | 82.10% | 0.25 | 2.49E-16 |
| ANKRD12      | HLA-DR+2 | 73.60% | 70.60% | 0.26 | 3.94E-16 |
| GLUL         | HLA-DR+2 | 72.00% | 76.40% | 0.29 | 4.52E-16 |
| NEDD9        | HLA-DR+2 | 28.80% | 14.80% | 0.29 | 4.94E-16 |
| PLIN2        | HLA-DR+2 | 39.60% | 30.70% | 0.40 | 8.30E-16 |
| ACTR2        | HLA-DR+2 | 60.60% | 51.00% | 0.26 | 1.06E-15 |
| MFSD1        | HLA-DR+2 | 47.20% | 37.40% | 0.27 | 3.02E-15 |
| DNAJA1       | HLA-DR+2 | 86.00% | 90.90% | 0.26 | 3.29E-15 |
| SETD5-AS1    | HLA-DR+2 | 47.90% | 40.30% | 0.26 | 4.11E-15 |
| CA2          | HLA-DR+2 | 19.40% | 6.60%  | 0.30 | 7.19E-15 |
| ITGA5        | HLA-DR+2 | 43.00% | 36.00% | 0.25 | 1.00E-14 |
| B4GALT1      | HLA-DR+2 | 42.70% | 34.60% | 0.34 | 2.23E-14 |
| HNRNPA2B1    | HLA-DR+2 | 96.10% | 95.80% | 0.26 | 2.32E-14 |
| ID2          | HLA-DR+2 | 90.20% | 89.60% | 0.38 | 1.69E-13 |
| GTF2B        | HLA-DR+2 | 51.00% | 41.20% | 0.25 | 2.90E-13 |
| KMT2E        | HLA-DR+2 | 67.40% | 58.90% | 0.27 | 4.33E-13 |
| RP11-138A9.2 | HLA-DR+2 | 30.80% | 16.60% | 0.28 | 4.62E-13 |
| S100A11      | HLA-DR+2 | 99.00% | 98.80% | 0.25 | 4.70E-13 |
| CEBPB        | HLA-DR+2 | 46.90% | 43.30% | 0.26 | 1.62E-11 |
| SQSTM1       | HLA-DR+2 | 93.80% | 92.40% | 0.28 | 8.67E-10 |
| FOSB         | HLA-DR+2 | 80.60% | 85.80% | 0.27 | 5.91E-08 |
| MIR24-2      | HLA-DR+2 | 42.00% | 31.10% | 0.27 | 6.86E-08 |
| MAFB         | HLA-DR+2 | 42.50% | 43.40% | 0.28 | 1.46E-07 |
| LSP1         | HLA-DR+2 | 75.40% | 69.70% | 0.26 | 5.46E-07 |
| XIST         | HLA-DR+2 | 58.30% | 44.20% | 0.30 | 8.65E-07 |
| CXCL1        | HLA-DR+2 | 53.10% | 46.10% | 0.52 | 1.52E-06 |
| HBB          | HLA-DR+2 | 15.50% | 7.80%  | 0.54 | 4.74E-02 |

|            |           |         |        |      |                       |
|------------|-----------|---------|--------|------|-----------------------|
| ZFP36      | HLA-DR+-2 | 94.80%  | 92.30% | 0.27 | 4.25E-01              |
| CCL20      | HLA-DR+-2 | 15.50%  | 13.30% | 0.53 | 5.77E-01              |
| TM4SF1     | EC        | 99.50%  | 49.10% | 2.57 | 0.00E+00              |
| PLVAP      | EC        | 87.00%  | 2.10%  | 2.31 | 0.00E+00              |
| DARC       | EC        | 69.40%  | 1.70%  | 2.31 | 0.00E+00              |
| RAMP2      | EC        | 97.70%  | 30.30% | 2.05 | 0.00E+00              |
| GNG11      | EC        | 98.70%  | 62.80% | 1.99 | 0.00E+00              |
| EMCN       | EC        | 92.50%  | 1.00%  | 1.78 | 0.00E+00              |
| IFI27      | EC        | 97.90%  | 59.50% | 1.77 | 0.00E+00              |
| CALCRL     | EC        | 91.50%  | 5.00%  | 1.76 | 0.00E+00              |
| BCAM       | EC        | 93.50%  | 3.00%  | 1.75 | 0.00E+00              |
| ECSCR      | EC        | 90.40%  | 1.00%  | 1.62 | 0.00E+00              |
| GIMAP7     | EC        | 80.10%  | 3.60%  | 1.61 | 0.00E+00              |
| AC011526.1 | EC        | 90.20%  | 0.90%  | 1.59 | 0.00E+00              |
| ELTD1      | EC        | 88.10%  | 1.00%  | 1.57 | 0.00E+00              |
| RAMP3      | EC        | 84.70%  | 9.20%  | 1.56 | 0.00E+00              |
| ESAM       | EC        | 84.70%  | 3.60%  | 1.53 | 0.00E+00              |
| CLEC14A    | EC        | 84.70%  | 1.40%  | 1.52 | 0.00E+00              |
| SPRY1      | EC        | 80.30%  | 15.10% | 1.49 | 0.00E+00              |
| VWF        | EC        | 75.10%  | 1.40%  | 1.42 | 0.00E+00              |
| SLC9A3R2   | EC        | 64.00%  | 10.70% | 1.38 | 0.00E+00              |
| PDLIM1     | EC        | 97.20%  | 48.90% | 1.33 | 0.00E+00              |
| HLA-E      | EC        | 100.00% | 90.90% | 1.32 | 0.00E+00              |
| ARHGAP29   | EC        | 82.90%  | 13.30% | 1.29 | 0.00E+00              |
| NPDC1      | EC        | 80.60%  | 9.50%  | 1.26 | 0.00E+00              |
| HLA-B      | EC        | 100.00% | 98.10% | 1.25 | 0.00E+00              |
| CD93       | EC        | 75.60%  | 2.70%  | 1.21 | 0.00E+00              |
| TM4SF18    | EC        | 72.30%  | 0.40%  | 1.20 | 0.00E+00              |
| HYAL2      | EC        | 70.20%  | 18.80% | 1.12 | 0.00E+00              |
| PODXL      | EC        | 74.10%  | 4.50%  | 1.12 | 0.00E+00              |
| SLCO2A1    | EC        | 66.30%  | 0.60%  | 1.09 | 0.00E+00              |
| CYR1       | EC        | 68.10%  | 0.50%  | 0.98 | 0.00E+00              |
| PTPRB      | EC        | 67.40%  | 0.60%  | 0.95 | 0.00E+00              |
| TIE1       | EC        | 69.20%  | 0.50%  | 0.90 | 0.00E+00              |
| MYCT1      | EC        | 57.80%  | 0.20%  | 0.70 | 0.00E+00              |
| MGST2      | EC        | 81.10%  | 15.00% | 1.11 | 7.56912083440904e-310 |
| CD200      | EC        | 63.70%  | 1.40%  | 1.10 | 0.00E+00              |
| CDH5       | EC        | 60.10%  | 0.60%  | 0.80 | 0.00E+00              |
| CXorf36    | EC        | 58.00%  | 0.50%  | 0.75 | 1.62E-305             |
| TSPAN7     | EC        | 76.90%  | 5.00%  | 1.05 | 3.77E-305             |
| SYNE2      | EC        | 84.20%  | 14.60% | 1.26 | 2.41E-300             |

|         |    |         |         |      |           |
|---------|----|---------|---------|------|-----------|
| HSPG2   | EC | 85.20%  | 40.00%  | 1.12 | 6.32E-298 |
| B2M     | EC | 100.00% | 100.00% | 0.88 | 2.00E-296 |
| LUZP1   | EC | 85.80%  | 40.40%  | 1.04 | 1.30E-292 |
| ITM2A   | EC | 87.80%  | 21.20%  | 1.53 | 1.45E-288 |
| ITGA6   | EC | 75.40%  | 10.40%  | 1.04 | 2.83E-287 |
| GIMAP5  | EC | 66.80%  | 2.60%   | 1.14 | 2.32E-284 |
| STC1    | EC | 53.60%  | 0.80%   | 1.72 | 5.42E-283 |
| SELE    | EC | 49.50%  | 2.10%   | 2.45 | 1.41E-282 |
| ERG     | EC | 68.40%  | 5.70%   | 0.88 | 1.92E-280 |
| SOX7    | EC | 53.60%  | 0.40%   | 0.81 | 3.12E-279 |
| GIMAP6  | EC | 63.50%  | 1.70%   | 0.79 | 1.23E-271 |
| A2M     | EC | 88.90%  | 20.20%  | 1.62 | 9.06E-270 |
| JAM2    | EC | 69.90%  | 9.60%   | 0.92 | 2.52E-264 |
| FKBP1A  | EC | 95.10%  | 82.40%  | 0.89 | 4.31E-264 |
| ARL4A   | EC | 79.00%  | 46.30%  | 1.11 | 3.53E-259 |
| TSC22D1 | EC | 89.10%  | 52.40%  | 1.56 | 3.61E-259 |
| FLT1    | EC | 55.40%  | 1.00%   | 0.76 | 3.82E-257 |
| HLA-A   | EC | 100.00% | 98.10%  | 0.97 | 2.21E-256 |
| MALL    | EC | 68.10%  | 10.30%  | 0.90 | 1.23E-253 |
| ELK3    | EC | 81.30%  | 35.10%  | 0.93 | 3.80E-253 |
| ENG     | EC | 86.80%  | 53.90%  | 0.96 | 1.29E-247 |
| EPAS1   | EC | 84.50%  | 25.10%  | 1.04 | 1.19E-246 |
| ETS2    | EC | 88.30%  | 30.10%  | 1.21 | 4.82E-244 |
| WWTR1   | EC | 73.80%  | 33.90%  | 0.89 | 4.18E-238 |
| IGFBP7  | EC | 98.70%  | 63.60%  | 1.52 | 2.31E-237 |
| ADAM15  | EC | 77.20%  | 29.40%  | 0.89 | 5.55E-237 |
| ADAMTS9 | EC | 58.50%  | 3.80%   | 1.16 | 1.02E-236 |
| KTN1    | EC | 92.70%  | 71.00%  | 0.90 | 1.52E-235 |
| SPTBN1  | EC | 83.90%  | 46.50%  | 0.94 | 2.54E-229 |
| BCL6B   | EC | 45.10%  | 0.40%   | 0.48 | 9.13E-227 |
| PRKCH   | EC | 63.50%  | 3.70%   | 0.74 | 2.26E-226 |
| F2R     | EC | 60.60%  | 3.00%   | 0.81 | 3.67E-226 |
| SNHG7   | EC | 79.50%  | 34.20%  | 0.91 | 1.44E-223 |
| KDR     | EC | 43.50%  | 0.30%   | 0.65 | 2.54E-222 |
| RDX     | EC | 86.50%  | 55.20%  | 0.88 | 6.97E-222 |
| NUAK1   | EC | 58.00%  | 4.90%   | 0.80 | 4.49E-220 |
| FAM198B | EC | 72.30%  | 12.30%  | 0.92 | 1.10E-219 |
| SRP14   | EC | 99.20%  | 97.60%  | 0.77 | 4.26E-217 |
| RND1    | EC | 57.00%  | 9.90%   | 0.98 | 1.05E-216 |
| EFNA1   | EC | 58.80%  | 4.50%   | 0.78 | 7.64E-216 |
| MCTP1   | EC | 64.00%  | 4.40%   | 0.89 | 1.18E-215 |

|         |    |         |        |      |           |
|---------|----|---------|--------|------|-----------|
| EGFL7   | EC | 53.10%  | 2.20%  | 0.97 | 2.51E-215 |
| ITGB4   | EC | 46.40%  | 0.90%  | 0.63 | 2.04E-214 |
| IL3RA   | EC | 57.00%  | 2.30%  | 0.71 | 1.73E-213 |
| MMRN2   | EC | 46.10%  | 0.80%  | 0.66 | 6.42E-212 |
| PCDH17  | EC | 46.90%  | 0.80%  | 0.57 | 2.86E-208 |
| CCL14   | EC | 38.60%  | 0.10%  | 0.60 | 2.13E-207 |
| SWAP70  | EC | 71.20%  | 24.10% | 0.92 | 1.10E-206 |
| PVRL2   | EC | 75.10%  | 29.60% | 0.84 | 8.01E-206 |
| TCF4    | EC | 90.40%  | 65.30% | 0.93 | 8.98E-206 |
| F2RL3   | EC | 39.90%  | 0.30%  | 0.82 | 3.59E-205 |
| CRIP2   | EC | 96.90%  | 74.40% | 0.98 | 5.99E-204 |
| CNKSR3  | EC | 49.70%  | 1.90%  | 0.70 | 6.36E-203 |
| KCNN3   | EC | 50.30%  | 2.10%  | 0.66 | 7.48E-203 |
| SLC2A3  | EC | 80.10%  | 33.30% | 1.03 | 3.15E-202 |
| MTUS1   | EC | 76.90%  | 21.80% | 0.98 | 2.52E-197 |
| PTMA    | EC | 100.00% | 99.90% | 0.68 | 1.61E-194 |
| RHOJ    | EC | 53.10%  | 3.60%  | 0.67 | 3.28E-194 |
| TINAGL1 | EC | 56.50%  | 3.60%  | 0.71 | 1.13E-190 |
| HLA-C   | EC | 99.70%  | 97.30% | 0.84 | 1.28E-189 |
| S1PR1   | EC | 50.30%  | 1.80%  | 0.57 | 1.52E-189 |
| MCAM    | EC | 59.60%  | 4.60%  | 0.71 | 1.57E-189 |
| RAB11A  | EC | 85.80%  | 49.30% | 0.77 | 2.68E-188 |
| ABCB1   | EC | 39.90%  | 0.40%  | 0.42 | 1.04E-187 |
| TPM3    | EC | 95.30%  | 71.80% | 0.82 | 3.60E-187 |
| AKR1C3  | EC | 79.30%  | 32.90% | 1.02 | 1.49E-186 |
| LCN6.1  | EC | 35.80%  | 0.10%  | 0.47 | 4.43E-186 |
| GIMAP4  | EC | 58.00%  | 3.70%  | 0.81 | 1.29E-185 |
| CD34    | EC | 71.20%  | 10.90% | 0.87 | 4.27E-185 |
| CLDN5   | EC | 45.60%  | 2.00%  | 1.05 | 5.78E-184 |
| CDC37   | EC | 88.90%  | 65.60% | 0.73 | 6.37E-183 |
| HLA-F   | EC | 76.90%  | 23.40% | 0.84 | 1.18E-182 |
| SPARCL1 | EC | 97.20%  | 76.00% | 1.16 | 1.74E-177 |
| NEDD9   | EC | 64.50%  | 13.50% | 0.84 | 1.84E-177 |
| COL15A1 | EC | 79.50%  | 23.10% | 1.07 | 2.54E-177 |
| RPS28   | EC | 100.00% | 99.80% | 0.60 | 5.00E-177 |
| GIMAP1  | EC | 51.80%  | 2.60%  | 0.69 | 1.19E-175 |
| RBP7    | EC | 44.00%  | 1.30%  | 0.57 | 1.24E-174 |
| PLAT    | EC | 54.70%  | 13.50% | 0.84 | 5.20E-174 |
| CD59    | EC | 95.90%  | 81.80% | 0.87 | 5.92E-173 |
| ADCY4   | EC | 40.40%  | 0.80%  | 0.45 | 1.81E-172 |
| SOX17   | EC | 33.90%  | 0.20%  | 0.58 | 5.22E-171 |

|           |    |         |        |      |           |
|-----------|----|---------|--------|------|-----------|
| ENTPD1    | EC | 62.20%  | 6.60%  | 0.77 | 7.96E-170 |
| RPS2      | EC | 100.00% | 99.60% | 0.73 | 1.47E-165 |
| RPL36A    | EC | 99.20%  | 94.50% | 0.82 | 1.40E-164 |
| CDC42EP3  | EC | 68.40%  | 16.30% | 1.03 | 2.43E-164 |
| SERPINE1  | EC | 68.10%  | 35.50% | 1.20 | 5.69E-162 |
| ITGA2     | EC | 36.80%  | 0.70%  | 0.46 | 2.54E-161 |
| GPR56     | EC | 43.30%  | 1.60%  | 0.45 | 3.40E-161 |
| CLEC2B    | EC | 71.00%  | 14.70% | 1.04 | 2.83E-160 |
| ARHGEF15  | EC | 31.10%  | 0.10%  | 0.35 | 8.47E-160 |
| CAV2      | EC | 79.80%  | 37.70% | 0.79 | 5.33E-159 |
| ROBO4     | EC | 39.60%  | 1.00%  | 0.45 | 5.60E-159 |
| RAPGEF4   | EC | 46.90%  | 3.80%  | 0.52 | 3.97E-158 |
| ETS1      | EC | 68.10%  | 18.30% | 0.78 | 1.02E-156 |
| DUSP23    | EC | 67.40%  | 34.90% | 0.75 | 1.28E-156 |
| MEF2C     | EC | 78.80%  | 20.00% | 0.94 | 2.80E-155 |
| GPR116    | EC | 47.40%  | 2.40%  | 0.61 | 5.25E-155 |
| IGF2      | EC | 44.80%  | 2.40%  | 1.00 | 8.00E-154 |
| PALMD     | EC | 75.90%  | 37.10% | 0.84 | 3.02E-152 |
| ABI3      | EC | 43.00%  | 1.70%  | 0.45 | 4.14E-151 |
| LMCD1     | EC | 72.50%  | 22.00% | 0.87 | 6.57E-151 |
| TEK       | EC | 32.90%  | 0.40%  | 0.36 | 6.65E-151 |
| TMSB10    | EC | 100.00% | 98.00% | 0.82 | 1.89E-149 |
| SPNS2     | EC | 31.90%  | 0.30%  | 0.33 | 4.49E-149 |
| RASIP1    | EC | 32.90%  | 0.40%  | 0.35 | 7.44E-149 |
| PRCP      | EC | 78.00%  | 48.90% | 0.72 | 1.13E-148 |
| TSPAN13   | EC | 39.60%  | 1.50%  | 0.50 | 1.41E-146 |
| IFI16     | EC | 92.50%  | 68.90% | 0.89 | 9.93E-146 |
| SOX18     | EC | 28.80%  | 0.10%  | 0.33 | 1.63E-144 |
| MMRN1     | EC | 27.20%  | 0.10%  | 0.52 | 2.15E-143 |
| CCDC85B   | EC | 91.20%  | 68.60% | 0.71 | 4.17E-143 |
| MEOX1     | EC | 48.40%  | 4.20%  | 0.64 | 1.22E-141 |
| C4orf32   | EC | 54.40%  | 6.40%  | 0.63 | 1.38E-141 |
| SSFA2     | EC | 62.40%  | 13.80% | 0.66 | 2.19E-141 |
| C19orf33  | EC | 31.10%  | 0.40%  | 0.42 | 1.58E-139 |
| STOM      | EC | 84.20%  | 48.10% | 0.77 | 4.86E-139 |
| BMP2R     | EC | 67.40%  | 29.20% | 0.66 | 1.55E-138 |
| SEMA6A    | EC | 32.10%  | 0.50%  | 0.36 | 1.24E-137 |
| AKAP13    | EC | 86.30%  | 60.90% | 0.76 | 3.41E-137 |
| NES       | EC | 43.80%  | 2.60%  | 0.51 | 7.10E-137 |
| ECE1      | EC | 72.80%  | 24.20% | 0.70 | 2.34E-135 |
| C10orf128 | EC | 44.60%  | 2.90%  | 0.43 | 3.90E-135 |

|          |    |         |        |      |           |
|----------|----|---------|--------|------|-----------|
| CD74     | EC | 95.60%  | 48.80% | 0.54 | 1.13E-134 |
| EDN1     | EC | 31.30%  | 0.80%  | 0.79 | 1.26E-134 |
| DLL4     | EC | 30.80%  | 0.40%  | 0.40 | 1.51E-134 |
| RPS7     | EC | 99.50%  | 99.00% | 0.52 | 2.99E-134 |
| MGLL     | EC | 75.60%  | 28.40% | 0.86 | 6.64E-134 |
| PKP4     | EC | 44.60%  | 4.10%  | 0.52 | 1.31E-133 |
| SHROOM4  | EC | 43.80%  | 4.00%  | 0.48 | 2.40E-133 |
| FAM84B   | EC | 39.10%  | 1.90%  | 0.49 | 8.89E-133 |
| RALGAPA2 | EC | 42.50%  | 2.60%  | 0.42 | 1.74E-129 |
| TGFBR2   | EC | 74.40%  | 35.00% | 0.75 | 2.87E-129 |
| RPS6     | EC | 100.00% | 99.80% | 0.54 | 3.28E-129 |
| KANK3    | EC | 26.90%  | 0.20%  | 0.30 | 5.81E-127 |
| CLIC2    | EC | 66.80%  | 20.20% | 0.67 | 9.34E-127 |
| GIMAP8   | EC | 32.90%  | 1.00%  | 0.33 | 2.73E-126 |
| AFAP1L1  | EC | 29.00%  | 0.40%  | 0.33 | 3.05E-126 |
| EHD4     | EC | 60.40%  | 16.40% | 0.66 | 5.85E-126 |
| KRT18    | EC | 44.30%  | 3.20%  | 0.56 | 3.60E-125 |
| SMAGP    | EC | 47.40%  | 5.50%  | 0.53 | 5.63E-125 |
| FLI1     | EC | 52.80%  | 6.30%  | 0.54 | 1.56E-124 |
| RPS19    | EC | 100.00% | 99.50% | 0.56 | 5.90E-123 |
| DOCK9    | EC | 49.20%  | 6.00%  | 0.49 | 8.40E-123 |
| APOLD1   | EC | 50.00%  | 5.60%  | 0.62 | 2.79E-122 |
| SMAD1    | EC | 39.90%  | 3.50%  | 0.48 | 7.06E-122 |
| LDB2     | EC | 46.60%  | 5.90%  | 0.54 | 7.44E-122 |
| MAGI1    | EC | 40.90%  | 3.50%  | 0.49 | 1.98E-121 |
| NOTCH4   | EC | 33.90%  | 1.70%  | 0.45 | 2.91E-121 |
| PSMB8    | EC | 78.50%  | 40.70% | 0.64 | 9.70E-121 |
| TMEM204  | EC | 46.40%  | 7.30%  | 0.58 | 3.70E-120 |
| NDRG1    | EC | 84.70%  | 60.10% | 0.67 | 1.18E-119 |
| YPEL2    | EC | 67.90%  | 29.00% | 0.69 | 1.98E-119 |
| MYH9     | EC | 79.30%  | 42.40% | 0.71 | 2.04E-119 |
| ACTN4    | EC | 76.40%  | 50.80% | 0.65 | 2.92E-119 |
| CAV1     | EC | 98.70%  | 80.10% | 0.86 | 4.89E-119 |
| IFITM3   | EC | 99.50%  | 92.80% | 0.67 | 1.80E-118 |
| C1orf115 | EC | 24.60%  | 0.20%  | 0.26 | 6.78E-118 |
| COL4A1   | EC | 68.40%  | 29.10% | 1.02 | 3.14E-117 |
| ADM5     | EC | 31.10%  | 1.20%  | 0.41 | 3.30E-116 |
| RAI14    | EC | 60.40%  | 17.20% | 0.60 | 3.52E-116 |
| HOXB7    | EC | 35.20%  | 1.70%  | 0.35 | 7.10E-116 |
| RUNDC3B  | EC | 26.70%  | 0.40%  | 0.29 | 1.43E-115 |
| CCDC3    | EC | 41.20%  | 3.50%  | 0.45 | 9.62E-114 |

|           |    |         |        |      |           |
|-----------|----|---------|--------|------|-----------|
| ARHGDI3   | EC | 73.30%  | 19.60% | 0.55 | 1.17E-113 |
| CNTNAP3B  | EC | 35.20%  | 2.20%  | 0.40 | 3.18E-113 |
| RPS15A    | EC | 100.00% | 99.60% | 0.48 | 9.63E-113 |
| KIAA0355  | EC | 56.70%  | 13.10% | 0.58 | 1.76E-112 |
| ARHGEF3   | EC | 45.10%  | 4.50%  | 0.45 | 1.78E-112 |
| MBNL1     | EC | 80.10%  | 51.10% | 0.67 | 6.58E-112 |
| IL6ST     | EC | 80.60%  | 58.90% | 0.63 | 7.84E-112 |
| ATP1A1    | EC | 85.20%  | 70.80% | 0.61 | 2.45E-111 |
| PITPNC1   | EC | 34.50%  | 1.60%  | 0.34 | 4.24E-111 |
| HEG1      | EC | 69.90%  | 34.60% | 0.64 | 1.65E-110 |
| RPL26     | EC | 100.00% | 99.70% | 0.47 | 3.41E-110 |
| THBD      | EC | 77.70%  | 29.90% | 0.92 | 7.02E-109 |
| CD320     | EC | 67.90%  | 31.10% | 0.61 | 2.74E-108 |
| TNFRSF10D | EC | 47.20%  | 11.90% | 0.59 | 7.35E-108 |
| HHEX      | EC | 43.50%  | 4.20%  | 0.43 | 4.05E-107 |
| GMFG      | EC | 64.00%  | 14.70% | 0.49 | 4.75E-107 |
| FAM167B   | EC | 27.20%  | 0.80%  | 0.28 | 6.71E-107 |
| NRP1      | EC | 71.20%  | 25.10% | 0.67 | 5.76E-106 |
| FAM107A   | EC | 25.60%  | 0.50%  | 0.35 | 6.69E-106 |
| RPL32     | EC | 100.00% | 99.80% | 0.49 | 9.88E-105 |
| RAPGEF3   | EC | 37.60%  | 3.00%  | 0.42 | 3.16E-104 |
| ANGPT2    | EC | 40.40%  | 4.90%  | 0.94 | 6.74E-104 |
| DAAM1     | EC | 65.80%  | 26.70% | 0.68 | 7.96E-104 |
| EIF4B     | EC | 88.10%  | 64.60% | 0.62 | 1.50E-102 |
| PDE2A     | EC | 31.10%  | 1.30%  | 0.33 | 4.02E-102 |
| CPLX1     | EC | 20.50%  | 0.10%  | 0.30 | 4.69E-102 |
| RPL36     | EC | 100.00% | 99.20% | 0.47 | 1.17E-101 |
| MKL2      | EC | 38.60%  | 4.30%  | 0.44 | 2.05E-101 |
| GABRD     | EC | 20.70%  | 0.10%  | 0.26 | 1.18E-99  |
| COL4A2    | EC | 66.80%  | 33.20% | 0.88 | 3.00E-99  |
| GRB10     | EC | 45.60%  | 7.80%  | 0.46 | 4.32E-99  |
| RPS3      | EC | 99.50%  | 99.40% | 0.49 | 1.54E-98  |
| NRGN      | EC | 33.70%  | 2.00%  | 0.33 | 6.41E-98  |
| MYLK      | EC | 39.10%  | 4.50%  | 0.33 | 2.09E-97  |
| TMEM2     | EC | 63.20%  | 21.90% | 0.62 | 2.77E-97  |
| TAP1      | EC | 60.90%  | 24.20% | 0.61 | 4.86E-97  |
| CDH13     | EC | 63.50%  | 28.30% | 0.70 | 3.53E-96  |
| VWA1      | EC | 40.90%  | 6.60%  | 0.47 | 3.54E-96  |
| COL18A1   | EC | 73.30%  | 24.90% | 0.72 | 4.05E-96  |
| GPRC5B    | EC | 24.10%  | 0.50%  | 0.25 | 5.02E-96  |
| APLNR     | EC | 28.50%  | 1.10%  | 0.33 | 3.84E-95  |

|         |    |         |        |      |          |
|---------|----|---------|--------|------|----------|
| ZNF366  | EC | 20.70%  | 0.20%  | 0.25 | 4.08E-95 |
| MAST4   | EC | 45.10%  | 8.60%  | 0.54 | 1.40E-94 |
| RPS8    | EC | 100.00% | 99.70% | 0.51 | 3.23E-94 |
| RPS18   | EC | 100.00% | 99.70% | 0.54 | 1.46E-93 |
| INSR    | EC | 48.20%  | 16.10% | 0.64 | 3.32E-93 |
| LPAR6   | EC | 48.40%  | 7.30%  | 0.48 | 4.56E-93 |
| SLC44A2 | EC | 45.90%  | 9.30%  | 0.45 | 7.79E-93 |
| BACE2   | EC | 44.80%  | 7.60%  | 0.43 | 2.48E-92 |
| ARAP3   | EC | 25.90%  | 0.90%  | 0.27 | 2.72E-92 |
| PTP4A3  | EC | 38.90%  | 4.00%  | 0.47 | 2.78E-92 |
| RAPGEF5 | EC | 22.80%  | 0.40%  | 0.27 | 2.86E-92 |
| AQP1    | EC | 96.90%  | 77.40% | 0.72 | 4.11E-92 |
| RASGRP3 | EC | 37.60%  | 4.10%  | 0.31 | 8.34E-92 |
| GJA1    | EC | 66.80%  | 47.10% | 0.60 | 3.76E-91 |
| EDNRB   | EC | 36.00%  | 3.40%  | 0.80 | 1.75E-90 |
| FRY     | EC | 35.80%  | 3.50%  | 0.39 | 4.18E-90 |
| SDPR    | EC | 41.50%  | 5.40%  | 0.62 | 2.90E-89 |
| DOCK6   | EC | 35.80%  | 3.40%  | 0.36 | 5.31E-89 |
| MYL12A  | EC | 96.40%  | 90.80% | 0.58 | 1.17E-88 |
| FZD6    | EC | 35.50%  | 3.20%  | 0.33 | 2.09E-88 |
| SSH1    | EC | 44.80%  | 6.60%  | 0.44 | 2.31E-88 |
| NOTCH1  | EC | 36.80%  | 3.50%  | 0.36 | 2.83E-88 |
| PTPRK   | EC | 50.30%  | 9.80%  | 0.44 | 8.13E-88 |
| SNCG    | EC | 53.40%  | 11.60% | 0.62 | 8.90E-88 |
| TSHZ1   | EC | 43.00%  | 7.40%  | 0.44 | 1.15E-87 |
| KCNK5   | EC | 30.30%  | 2.00%  | 0.27 | 3.78E-87 |
| CD79B   | EC | 34.20%  | 3.40%  | 0.39 | 6.72E-87 |
| FAM60A  | EC | 45.30%  | 6.80%  | 0.40 | 1.20E-86 |
| PLEKHG1 | EC | 32.40%  | 2.40%  | 0.28 | 8.71E-86 |
| RASA4   | EC | 36.80%  | 4.00%  | 0.44 | 1.12E-85 |
| NEURL1B | EC | 26.70%  | 1.20%  | 0.26 | 1.21E-85 |
| ACVRL1  | EC | 36.00%  | 3.40%  | 0.33 | 1.44E-85 |
| EPHA4   | EC | 28.00%  | 2.00%  | 0.32 | 7.55E-85 |
| NOSTRIN | EC | 29.30%  | 2.50%  | 0.38 | 8.11E-85 |
| H3F3A   | EC | 98.20%  | 98.30% | 0.49 | 9.93E-85 |
| MFNG    | EC | 31.90%  | 2.50%  | 0.34 | 1.48E-83 |
| GFOD1   | EC | 34.20%  | 3.00%  | 0.32 | 1.55E-83 |
| CRHBP   | EC | 18.90%  | 0.20%  | 0.28 | 2.26E-82 |
| EFNB2   | EC | 39.60%  | 6.10%  | 0.45 | 8.06E-82 |
| LMO2    | EC | 36.00%  | 3.80%  | 0.39 | 8.11E-82 |
| HSPA12B | EC | 29.30%  | 2.20%  | 0.32 | 8.21E-82 |



|           |    |         |        |      |          |
|-----------|----|---------|--------|------|----------|
| RPL38     | EC | 99.50%  | 99.20% | 0.40 | 2.12E-81 |
| SPHK1     | EC | 67.90%  | 29.10% | 0.60 | 2.80E-81 |
| PLCB1     | EC | 34.20%  | 3.70%  | 0.34 | 4.54E-81 |
| POSTN     | EC | 38.30%  | 5.60%  | 0.56 | 4.65E-81 |
| ASAP1     | EC | 60.90%  | 22.70% | 0.56 | 5.32E-81 |
| ELF1      | EC | 73.10%  | 51.30% | 0.57 | 6.18E-81 |
| TSPAN14   | EC | 47.70%  | 9.40%  | 0.43 | 1.82E-80 |
| RPS21     | EC | 99.70%  | 98.60% | 0.45 | 2.52E-80 |
| RPL3      | EC | 100.00% | 99.70% | 0.46 | 1.61E-79 |
| OLFML2A   | EC | 38.60%  | 4.70%  | 0.38 | 1.78E-79 |
| RPL18A    | EC | 100.00% | 99.70% | 0.39 | 2.98E-79 |
| PRDM1     | EC | 41.50%  | 5.90%  | 0.57 | 5.77E-79 |
| TNFAIP1   | EC | 42.70%  | 8.50%  | 0.38 | 8.64E-79 |
| RPL34     | EC | 100.00% | 99.90% | 0.45 | 9.34E-79 |
| PREX2     | EC | 27.50%  | 1.90%  | 0.28 | 1.25E-78 |
| CCDC69    | EC | 47.40%  | 10.00% | 0.45 | 1.32E-78 |
| TACSTD2   | EC | 22.80%  | 0.80%  | 0.33 | 3.84E-78 |
| PSMB9     | EC | 63.20%  | 27.00% | 0.51 | 5.38E-78 |
| DOCK4     | EC | 32.90%  | 3.20%  | 0.32 | 6.90E-78 |
| TNFAIP8L1 | EC | 30.10%  | 2.30%  | 0.30 | 1.79E-77 |
| IFIT3     | EC | 46.40%  | 10.70% | 0.61 | 2.07E-77 |
| NUDT14    | EC | 41.70%  | 6.20%  | 0.38 | 2.97E-77 |
| GATA2     | EC | 38.30%  | 4.80%  | 0.48 | 3.75E-77 |
| TXNIP     | EC | 62.70%  | 43.50% | 0.99 | 1.08E-76 |
| SPRY4     | EC | 32.40%  | 3.30%  | 0.32 | 1.27E-76 |
| VAMP5     | EC | 79.80%  | 59.10% | 0.51 | 1.31E-76 |
| UPP1      | EC | 62.70%  | 26.70% | 0.61 | 2.53E-76 |
| RPL9      | EC | 99.70%  | 99.40% | 0.40 | 6.97E-76 |
| NCOA7     | EC | 65.30%  | 40.10% | 0.61 | 7.96E-76 |
| RPL18     | EC | 99.50%  | 99.20% | 0.41 | 8.56E-76 |
| RPL5      | EC | 99.70%  | 99.30% | 0.43 | 1.50E-75 |
| HDAC7     | EC | 47.20%  | 10.90% | 0.47 | 1.81E-75 |
| MECOM     | EC | 27.50%  | 2.00%  | 0.30 | 1.11E-74 |
| PIK3C2A   | EC | 52.30%  | 14.30% | 0.45 | 1.36E-74 |
| TESC      | EC | 23.10%  | 1.00%  | 0.26 | 1.42E-74 |
| COL21A1   | EC | 30.60%  | 2.70%  | 0.32 | 2.79E-74 |
| NRN1      | EC | 51.30%  | 13.50% | 0.52 | 3.26E-74 |
| LPHN2     | EC | 29.00%  | 2.30%  | 0.27 | 5.76E-74 |
| HECW2     | EC | 31.10%  | 3.70%  | 0.36 | 6.02E-74 |
| RPL35A    | EC | 100.00% | 99.60% | 0.35 | 2.20E-73 |
| MRPL33    | EC | 84.70%  | 72.00% | 0.49 | 2.50E-73 |

|          |    |         |        |      |          |
|----------|----|---------|--------|------|----------|
| GNAI2    | EC | 77.50%  | 55.50% | 0.56 | 2.60E-73 |
| SYNPO    | EC | 52.60%  | 18.20% | 0.49 | 4.80E-73 |
| UTRN     | EC | 61.90%  | 25.80% | 0.56 | 5.57E-73 |
| IPO11    | EC | 32.60%  | 3.80%  | 0.32 | 6.70E-73 |
| ARPC5L   | EC | 58.00%  | 33.20% | 0.46 | 9.65E-73 |
| IL33     | EC | 25.40%  | 1.90%  | 0.38 | 2.09E-72 |
| ARID5A   | EC | 66.10%  | 42.40% | 0.58 | 3.13E-72 |
| RPL37A   | EC | 99.70%  | 99.90% | 0.36 | 5.19E-72 |
| GLTSCR2  | EC | 92.70%  | 84.10% | 0.54 | 8.86E-72 |
| LIMS2    | EC | 46.60%  | 12.20% | 0.42 | 1.22E-71 |
| LAMA5    | EC | 30.80%  | 2.80%  | 0.29 | 1.42E-71 |
| SLCO4A1  | EC | 33.40%  | 4.90%  | 0.38 | 1.95E-71 |
| PNP      | EC | 65.30%  | 39.00% | 0.57 | 2.58E-71 |
| KIAA1462 | EC | 38.60%  | 7.30%  | 0.36 | 4.87E-71 |
| PTPRE    | EC | 56.70%  | 18.80% | 0.65 | 9.32E-71 |
| LAYN     | EC | 27.70%  | 2.50%  | 0.28 | 2.10E-70 |
| ARHGAP31 | EC | 35.20%  | 4.30%  | 0.31 | 2.37E-70 |
| RPL15    | EC | 100.00% | 99.60% | 0.39 | 4.11E-70 |
| CCL23    | EC | 15.80%  | 0.20%  | 0.35 | 5.22E-70 |
| TJP1     | EC | 61.10%  | 26.80% | 0.49 | 7.13E-70 |
| ACTN1    | EC | 77.50%  | 42.00% | 0.61 | 9.76E-70 |
| PGM5     | EC | 25.60%  | 1.90%  | 0.26 | 1.25E-69 |
| SH2D3C   | EC | 21.50%  | 0.80%  | 0.26 | 1.80E-69 |
| ZNF385D  | EC | 55.70%  | 36.30% | 0.51 | 3.37E-69 |
| TMEM255B | EC | 34.20%  | 4.20%  | 0.31 | 4.42E-69 |
| ICAM1    | EC | 69.40%  | 38.20% | 0.78 | 4.78E-69 |
| OCIAD2   | EC | 44.00%  | 9.70%  | 0.41 | 5.68E-69 |
| CRIM1    | EC | 53.60%  | 17.80% | 0.51 | 9.43E-69 |
| MYL12B   | EC | 95.90%  | 91.40% | 0.50 | 1.15E-68 |
| CNST     | EC | 46.40%  | 12.70% | 0.44 | 1.89E-68 |
| SVIL     | EC | 65.80%  | 31.60% | 0.53 | 3.01E-68 |
| RPS24    | EC | 99.70%  | 99.70% | 0.40 | 4.16E-68 |
| MX1      | EC | 42.50%  | 8.30%  | 0.47 | 7.65E-68 |
| MAP3K11  | EC | 43.30%  | 8.20%  | 0.40 | 2.12E-67 |
| MSN      | EC | 81.30%  | 69.50% | 0.48 | 2.18E-67 |
| SASH1    | EC | 58.30%  | 22.30% | 0.49 | 3.13E-67 |
| RPS13    | EC | 99.70%  | 99.50% | 0.38 | 3.72E-67 |
| SKAP2    | EC | 44.00%  | 9.10%  | 0.32 | 4.32E-67 |
| RPL31    | EC | 100.00% | 99.60% | 0.40 | 2.10E-66 |
| RPL11    | EC | 99.70%  | 99.90% | 0.35 | 6.31E-66 |
| BCAR1    | EC | 47.20%  | 13.60% | 0.41 | 1.57E-65 |

|         |    |         |        |      |          |
|---------|----|---------|--------|------|----------|
| RAB13   | EC | 82.40%  | 62.70% | 0.53 | 9.47E-65 |
| SNRK    | EC | 42.20%  | 8.70%  | 0.38 | 1.06E-64 |
| DUSP6   | EC | 56.00%  | 17.00% | 0.62 | 2.02E-63 |
| SERBP1  | EC | 89.90%  | 83.40% | 0.45 | 2.48E-63 |
| ICAM2   | EC | 42.50%  | 13.80% | 0.40 | 1.26E-62 |
| PLXNA2  | EC | 45.10%  | 10.50% | 0.40 | 2.69E-62 |
| RPS9    | EC | 99.70%  | 99.60% | 0.34 | 3.13E-62 |
| PLXND1  | EC | 44.30%  | 9.60%  | 0.41 | 1.34E-61 |
| TNFSF10 | EC | 59.10%  | 22.80% | 0.56 | 4.55E-61 |
| JAK1    | EC | 72.80%  | 50.60% | 0.49 | 4.94E-61 |
| ADAMTS4 | EC | 45.10%  | 10.30% | 0.45 | 7.62E-61 |
| CPXM2   | EC | 30.10%  | 4.20%  | 0.33 | 1.28E-60 |
| LRRFIP1 | EC | 88.60%  | 63.60% | 0.55 | 1.72E-60 |
| HIPK3   | EC | 61.40%  | 28.50% | 0.47 | 2.41E-60 |
| RPL29   | EC | 99.70%  | 99.20% | 0.39 | 3.08E-60 |
| ATP11C  | EC | 39.90%  | 9.00%  | 0.36 | 3.44E-60 |
| RPS29   | EC | 99.50%  | 99.40% | 0.36 | 4.92E-60 |
| RPGR    | EC | 40.40%  | 9.20%  | 0.37 | 1.07E-59 |
| TSPAN9  | EC | 33.90%  | 5.70%  | 0.29 | 1.85E-59 |
| ARGLU1  | EC | 75.40%  | 52.50% | 0.49 | 3.87E-59 |
| RPL37   | EC | 100.00% | 99.70% | 0.39 | 4.11E-59 |
| VGLL4   | EC | 64.50%  | 39.70% | 0.48 | 5.36E-59 |
| IFITM2  | EC | 97.20%  | 87.60% | 0.43 | 6.94E-59 |
| RPL8    | EC | 100.00% | 99.60% | 0.35 | 1.09E-58 |
| RPS3A   | EC | 100.00% | 99.60% | 0.36 | 1.91E-58 |
| SP100   | EC | 72.00%  | 44.00% | 0.48 | 2.31E-58 |
| CYTH1   | EC | 54.10%  | 17.50% | 0.46 | 7.80E-58 |
| RPL13   | EC | 100.00% | 99.90% | 0.35 | 8.56E-58 |
| ADIRF   | EC | 96.60%  | 88.40% | 0.69 | 2.50E-57 |
| LAP3    | EC | 61.70%  | 30.00% | 0.45 | 2.71E-57 |
| ITGA9   | EC | 32.10%  | 4.90%  | 0.30 | 4.86E-57 |
| GPR68   | EC | 26.70%  | 3.30%  | 0.27 | 7.18E-57 |
| AGRN    | EC | 30.60%  | 4.20%  | 0.31 | 1.84E-56 |
| RPS25   | EC | 99.70%  | 99.80% | 0.32 | 3.62E-56 |
| ATP8B1  | EC | 24.90%  | 2.50%  | 0.26 | 4.08E-56 |
| TMOD3   | EC | 66.10%  | 38.20% | 0.45 | 1.12E-55 |
| ITPR1   | EC | 36.80%  | 7.10%  | 0.32 | 2.04E-55 |
| RPS27A  | EC | 100.00% | 99.80% | 0.32 | 2.93E-55 |
| RILPL2  | EC | 64.80%  | 31.00% | 0.52 | 3.29E-55 |
| IL32    | EC | 43.50%  | 11.30% | 0.70 | 6.19E-55 |
| RPL21   | EC | 100.00% | 99.90% | 0.31 | 7.92E-55 |

|           |    |         |         |      |          |
|-----------|----|---------|---------|------|----------|
| GBP4      | EC | 25.60%  | 2.80%   | 0.26 | 2.44E-54 |
| RPL22     | EC | 100.00% | 99.10%  | 0.36 | 2.81E-54 |
| RPS15     | EC | 100.00% | 99.80%  | 0.31 | 2.99E-54 |
| VPS37B    | EC | 48.20%  | 13.00%  | 0.38 | 3.50E-54 |
| PTPRM     | EC | 43.50%  | 13.80%  | 0.37 | 2.68E-53 |
| PPFIBP1   | EC | 66.80%  | 37.20%  | 0.47 | 3.07E-53 |
| CTTNBP2NL | EC | 45.60%  | 13.00%  | 0.38 | 2.85E-52 |
| FRMD4A    | EC | 31.60%  | 5.00%   | 0.27 | 4.03E-52 |
| IFIT1     | EC | 33.40%  | 8.90%   | 0.43 | 1.20E-51 |
| PRMT1     | EC | 72.50%  | 52.20%  | 0.43 | 1.81E-51 |
| ITGA10    | EC | 52.80%  | 17.10%  | 0.48 | 2.51E-51 |
| KBTBD2    | EC | 48.70%  | 16.50%  | 0.38 | 3.50E-51 |
| LRR8C     | EC | 50.00%  | 17.60%  | 0.44 | 3.88E-51 |
| BTF3      | EC | 99.70%  | 97.70%  | 0.34 | 4.42E-51 |
| CPNE8     | EC | 49.00%  | 18.90%  | 0.40 | 4.51E-51 |
| FBXO34    | EC | 36.80%  | 9.00%   | 0.35 | 7.72E-51 |
| EIF4G2    | EC | 92.50%  | 88.20%  | 0.40 | 9.87E-51 |
| LIFR      | EC | 38.60%  | 14.60%  | 0.38 | 1.14E-50 |
| EIF2S2    | EC | 81.90%  | 68.60%  | 0.45 | 2.98E-50 |
| CFLAR     | EC | 71.00%  | 38.50%  | 0.52 | 2.98E-50 |
| SEC14L1   | EC | 55.40%  | 23.30%  | 0.41 | 5.21E-50 |
| CCND1     | EC | 73.60%  | 47.90%  | 0.59 | 5.41E-50 |
| NACA      | EC | 99.70%  | 99.10%  | 0.33 | 7.21E-50 |
| EEF1A1    | EC | 100.00% | 100.00% | 0.29 | 8.46E-50 |
| SYNGR2    | EC | 52.60%  | 17.70%  | 0.44 | 1.56E-49 |
| PGF       | EC | 44.80%  | 13.60%  | 0.55 | 1.63E-49 |
| INPP1     | EC | 46.10%  | 14.20%  | 0.33 | 2.82E-49 |
| GFOD2     | EC | 39.10%  | 10.60%  | 0.30 | 5.82E-49 |
| ARL15     | EC | 25.10%  | 4.20%   | 0.28 | 9.55E-49 |
| CRK       | EC | 61.70%  | 34.00%  | 0.42 | 2.61E-48 |
| EVA1C     | EC | 36.30%  | 9.00%   | 0.33 | 3.14E-48 |
| HEY1      | EC | 23.60%  | 2.90%   | 0.35 | 5.05E-48 |
| TJP2      | EC | 36.30%  | 8.20%   | 0.29 | 5.12E-48 |
| FLNB      | EC | 43.80%  | 13.90%  | 0.37 | 6.80E-48 |
| RAC1      | EC | 70.50%  | 55.70%  | 0.41 | 9.05E-48 |
| APOL3     | EC | 38.10%  | 9.60%   | 0.33 | 1.61E-47 |
| ANKRD28   | EC | 70.70%  | 58.60%  | 0.50 | 1.67E-47 |
| RPS14     | EC | 100.00% | 99.50%  | 0.33 | 2.64E-47 |
| RPL19     | EC | 99.70%  | 99.80%  | 0.28 | 3.37E-47 |
| BCR       | EC | 32.40%  | 6.00%   | 0.26 | 4.28E-47 |
| RBPMS     | EC | 42.20%  | 11.00%  | 0.31 | 6.26E-47 |

|           |    |         |        |      |          |
|-----------|----|---------|--------|------|----------|
| HOXD8     | EC | 36.80%  | 11.90% | 0.33 | 1.43E-46 |
| FNBP1L    | EC | 29.50%  | 5.20%  | 0.26 | 2.81E-46 |
| ZFP36L2   | EC | 79.50%  | 57.00% | 0.55 | 3.28E-46 |
| CCDC50    | EC | 60.10%  | 26.90% | 0.42 | 3.43E-46 |
| APP       | EC | 91.20%  | 78.50% | 0.49 | 3.72E-46 |
| KLF2      | EC | 45.30%  | 15.70% | 0.50 | 4.61E-46 |
| FGD5      | EC | 40.20%  | 12.00% | 0.33 | 5.47E-46 |
| RPL30     | EC | 100.00% | 99.60% | 0.30 | 6.53E-46 |
| FABP5     | EC | 51.60%  | 20.90% | 0.80 | 9.68E-46 |
| GRAMD1A   | EC | 31.90%  | 6.00%  | 0.28 | 1.57E-45 |
| LAPTM4B   | EC | 36.00%  | 10.30% | 0.31 | 2.29E-45 |
| TMEM70    | EC | 56.00%  | 33.50% | 0.41 | 3.19E-45 |
| YBX1      | EC | 91.20%  | 81.70% | 0.52 | 5.39E-45 |
| C19orf43  | EC | 85.00%  | 76.20% | 0.37 | 6.44E-45 |
| RPLP2     | EC | 100.00% | 99.90% | 0.27 | 1.08E-44 |
| RPS4X     | EC | 100.00% | 99.80% | 0.34 | 1.43E-44 |
| ATP1B3    | EC | 79.80%  | 70.00% | 0.44 | 1.44E-44 |
| TAGLN2    | EC | 98.40%  | 96.10% | 0.38 | 1.98E-44 |
| RPL35     | EC | 99.50%  | 99.50% | 0.30 | 2.09E-44 |
| SET       | EC | 79.50%  | 57.80% | 0.49 | 4.05E-44 |
| CTSH      | EC | 58.00%  | 22.70% | 0.34 | 6.46E-44 |
| MARCKSL1  | EC | 50.50%  | 17.40% | 0.40 | 1.05E-43 |
| RPL24     | EC | 99.50%  | 99.30% | 0.30 | 1.30E-43 |
| RPS10     | EC | 96.40%  | 96.10% | 0.36 | 2.77E-43 |
| FAM65A    | EC | 46.90%  | 16.00% | 0.35 | 3.94E-43 |
| TNFRSF10B | EC | 45.10%  | 15.60% | 0.35 | 5.05E-43 |
| PTRF      | EC | 94.30%  | 79.00% | 0.47 | 9.31E-43 |
| MACF1     | EC | 61.90%  | 34.20% | 0.42 | 1.79E-42 |
| ADAR      | EC | 53.10%  | 25.00% | 0.38 | 2.23E-42 |
| RALGDS    | EC | 43.30%  | 12.60% | 0.34 | 2.31E-42 |
| CTSC      | EC | 44.30%  | 13.20% | 0.39 | 4.02E-42 |
| FXYS5     | EC | 95.10%  | 82.00% | 0.38 | 4.35E-42 |
| JAG1      | EC | 39.90%  | 12.10% | 0.37 | 5.90E-42 |
| HNRNPA3   | EC | 86.30%  | 76.10% | 0.39 | 6.56E-42 |
| RPL27A    | EC | 100.00% | 99.60% | 0.28 | 7.75E-42 |
| SLFN5     | EC | 37.80%  | 10.70% | 0.33 | 1.04E-41 |
| RPS5      | EC | 99.50%  | 99.10% | 0.31 | 1.61E-41 |
| HNRNPF    | EC | 78.80%  | 66.20% | 0.41 | 2.32E-41 |
| PLK2      | EC | 56.00%  | 25.90% | 0.53 | 2.49E-41 |
| KIAA1551  | EC | 37.30%  | 9.40%  | 0.30 | 2.73E-41 |
| XRN2      | EC | 71.00%  | 48.30% | 0.40 | 3.10E-41 |

|         |    |         |        |      |          |
|---------|----|---------|--------|------|----------|
| ZNF462  | EC | 27.20%  | 5.00%  | 0.26 | 4.32E-41 |
| EMP1    | EC | 93.80%  | 87.10% | 0.49 | 4.55E-41 |
| RPL6    | EC | 100.00% | 99.60% | 0.28 | 4.60E-41 |
| CARD8   | EC | 32.40%  | 7.90%  | 0.31 | 6.47E-41 |
| KMT2E   | EC | 80.10%  | 58.40% | 0.44 | 1.37E-40 |
| FBL     | EC | 72.00%  | 52.50% | 0.39 | 6.12E-40 |
| FLOT1   | EC | 78.80%  | 61.20% | 0.37 | 1.25E-39 |
| ID1     | EC | 63.20%  | 48.60% | 0.65 | 1.38E-39 |
| U2AF1   | EC | 82.90%  | 76.90% | 0.37 | 1.65E-39 |
| KIFC3   | EC | 37.30%  | 13.60% | 0.31 | 4.12E-39 |
| IFI44L  | EC | 30.60%  | 6.50%  | 0.28 | 4.70E-39 |
| SNRPB   | EC | 80.60%  | 76.10% | 0.34 | 5.11E-39 |
| RPL12   | EC | 100.00% | 99.60% | 0.32 | 8.17E-39 |
| YES1    | EC | 44.30%  | 18.40% | 0.33 | 8.28E-39 |
| RPS12   | EC | 100.00% | 99.80% | 0.31 | 1.00E-38 |
| GSN     | EC | 97.70%  | 92.10% | 0.38 | 2.12E-38 |
| RPS23   | EC | 100.00% | 99.80% | 0.30 | 2.37E-38 |
| RPL7    | EC | 100.00% | 99.70% | 0.29 | 2.42E-38 |
| RGL2    | EC | 52.10%  | 26.30% | 0.33 | 2.78E-38 |
| S100A16 | EC | 75.60%  | 46.50% | 0.43 | 6.88E-38 |
| TENC1   | EC | 41.50%  | 16.60% | 0.33 | 8.16E-38 |
| YWHAE   | EC | 89.60%  | 83.60% | 0.35 | 1.06E-37 |
| PICALM  | EC | 58.50%  | 30.70% | 0.39 | 1.57E-37 |
| CLDN11  | EC | 17.10%  | 1.90%  | 0.27 | 3.31E-37 |
| MLLT4   | EC | 37.30%  | 11.70% | 0.28 | 3.36E-37 |
| RPS27   | EC | 100.00% | 99.90% | 0.26 | 3.88E-37 |
| SNTB2   | EC | 50.80%  | 25.20% | 0.35 | 5.57E-37 |
| SH2B3   | EC | 41.70%  | 13.60% | 0.26 | 8.59E-37 |
| BNIP2   | EC | 65.00%  | 39.40% | 0.38 | 1.21E-36 |
| CDK17   | EC | 37.60%  | 10.60% | 0.28 | 1.26E-36 |
| RPL27   | EC | 100.00% | 99.10% | 0.28 | 4.26E-36 |
| SDE2    | EC | 34.20%  | 11.00% | 0.27 | 6.47E-36 |
| FRMD4B  | EC | 59.60%  | 26.40% | 0.41 | 6.95E-36 |
| LYAR    | EC | 53.90%  | 26.50% | 0.36 | 7.53E-36 |
| SVIP    | EC | 47.40%  | 19.60% | 0.35 | 8.97E-36 |
| PCGF2   | EC | 44.00%  | 19.10% | 0.30 | 1.32E-35 |
| TSHZ2   | EC | 74.90%  | 47.40% | 0.49 | 1.68E-35 |
| FRYL    | EC | 38.60%  | 12.80% | 0.28 | 1.69E-35 |
| PARP14  | EC | 45.10%  | 17.40% | 0.33 | 1.90E-35 |
| OLFM1   | EC | 35.20%  | 13.10% | 0.29 | 1.99E-35 |
| GNB2L1  | EC | 99.70%  | 99.10% | 0.30 | 2.03E-35 |

|          |    |         |        |      |          |
|----------|----|---------|--------|------|----------|
| DDX3X    | EC | 82.90%  | 69.60% | 0.41 | 2.22E-35 |
| VAPA     | EC | 84.50%  | 77.90% | 0.34 | 3.02E-35 |
| TMEM173  | EC | 72.00%  | 51.00% | 0.38 | 4.26E-35 |
| HSD17B11 | EC | 67.60%  | 43.80% | 0.39 | 5.86E-35 |
| XAF1     | EC | 33.40%  | 9.30%  | 0.28 | 7.83E-35 |
| RPL23    | EC | 99.70%  | 99.10% | 0.29 | 1.75E-34 |
| KAT6A    | EC | 45.90%  | 17.50% | 0.31 | 2.39E-34 |
| HNRNPA1  | EC | 98.70%  | 96.60% | 0.33 | 2.91E-34 |
| TRIM25   | EC | 38.60%  | 12.30% | 0.29 | 1.40E-33 |
| PTPN12   | EC | 57.00%  | 38.60% | 0.35 | 2.10E-33 |
| PIM3     | EC | 52.10%  | 23.90% | 0.43 | 2.23E-33 |
| CRBN     | EC | 46.60%  | 23.20% | 0.30 | 2.23E-33 |
| PON2     | EC | 46.90%  | 21.70% | 0.31 | 2.62E-33 |
| CMIP     | EC | 48.40%  | 20.80% | 0.34 | 3.04E-33 |
| PTPN14   | EC | 46.60%  | 22.70% | 0.33 | 3.38E-33 |
| SLC12A2  | EC | 37.60%  | 12.80% | 0.30 | 3.63E-33 |
| TBC1D1   | EC | 39.40%  | 13.20% | 0.30 | 4.21E-33 |
| SDCBP    | EC | 94.80%  | 90.50% | 0.41 | 4.50E-33 |
| C8orf4   | EC | 36.80%  | 11.30% | 0.31 | 6.43E-33 |
| RGS16    | EC | 77.20%  | 57.00% | 0.63 | 1.02E-32 |
| DNAJB4   | EC | 59.80%  | 33.80% | 0.41 | 1.89E-32 |
| ZNF267   | EC | 52.60%  | 23.90% | 0.40 | 2.80E-32 |
| NET1     | EC | 42.50%  | 20.40% | 0.33 | 3.35E-32 |
| SLK      | EC | 50.30%  | 25.20% | 0.33 | 4.73E-32 |
| RPL17    | EC | 89.40%  | 80.00% | 0.36 | 5.36E-32 |
| NKTR     | EC | 56.00%  | 29.40% | 0.39 | 7.89E-32 |
| WNK1     | EC | 60.90%  | 39.70% | 0.35 | 8.07E-32 |
| MEF2A    | EC | 66.60%  | 42.50% | 0.38 | 1.50E-31 |
| LAMB1    | EC | 39.40%  | 13.50% | 0.31 | 1.63E-31 |
| DDX21    | EC | 77.50%  | 72.90% | 0.36 | 5.29E-31 |
| ANKRD11  | EC | 59.10%  | 42.80% | 0.36 | 5.49E-31 |
| RASAL2   | EC | 34.50%  | 11.30% | 0.25 | 1.11E-30 |
| CDC42EP2 | EC | 37.80%  | 12.70% | 0.29 | 1.70E-30 |
| SUN1     | EC | 46.40%  | 24.60% | 0.32 | 2.43E-30 |
| ABCD4    | EC | 45.60%  | 20.10% | 0.30 | 5.93E-30 |
| GNAS     | EC | 84.20%  | 74.80% | 0.34 | 1.39E-29 |
| MTRNR2L1 | EC | 45.90%  | 19.40% | 0.72 | 1.43E-29 |
| LAMA4    | EC | 64.00%  | 41.90% | 0.40 | 2.20E-29 |
| UACA     | EC | 63.50%  | 37.90% | 0.40 | 2.26E-29 |
| RPL10A   | EC | 100.00% | 99.30% | 0.28 | 2.84E-29 |
| WARS     | EC | 46.40%  | 24.40% | 0.33 | 2.97E-29 |

|          |    |        |        |      |          |
|----------|----|--------|--------|------|----------|
| RBM8A    | EC | 83.90% | 78.50% | 0.32 | 3.01E-29 |
| RAP1A    | EC | 79.80% | 62.40% | 0.35 | 5.07E-29 |
| PIK3R3   | EC | 40.20% | 18.30% | 0.30 | 6.02E-29 |
| KLF6     | EC | 87.80% | 80.10% | 0.43 | 6.21E-29 |
| RNF19A   | EC | 44.80% | 19.30% | 0.33 | 6.45E-29 |
| YBX3     | EC | 77.70% | 57.00% | 0.35 | 9.78E-29 |
| FEZ2     | EC | 64.50% | 40.40% | 0.33 | 2.37E-28 |
| NBEAL1   | EC | 86.50% | 79.10% | 0.34 | 5.76E-28 |
| ITGA5    | EC | 61.10% | 35.30% | 0.38 | 1.41E-27 |
| FUBP1    | EC | 53.60% | 28.90% | 0.30 | 2.00E-27 |
| RPL4     | EC | 97.20% | 97.80% | 0.25 | 2.86E-27 |
| PERP     | EC | 38.30% | 21.30% | 0.36 | 4.69E-27 |
| RHOC     | EC | 88.60% | 79.80% | 0.37 | 5.85E-27 |
| UBE2D3   | EC | 85.20% | 85.00% | 0.27 | 1.21E-26 |
| ZEB1     | EC | 56.00% | 33.10% | 0.35 | 1.33E-26 |
| TNPO1    | EC | 52.80% | 30.30% | 0.32 | 2.75E-26 |
| C10orf10 | EC | 15.50% | 9.00%  | 0.37 | 3.77E-26 |
| SOCS2    | EC | 40.40% | 17.80% | 0.29 | 5.26E-26 |
| MSRB3    | EC | 46.10% | 24.00% | 0.29 | 6.61E-26 |
| AP1S2    | EC | 68.10% | 39.10% | 0.35 | 8.13E-26 |
| IL13RA2  | EC | 19.90% | 6.90%  | 0.30 | 1.00E-25 |
| SHC1     | EC | 50.30% | 25.50% | 0.28 | 1.37E-25 |
| SON      | EC | 93.00% | 89.30% | 0.29 | 1.56E-25 |
| NR2F2    | EC | 39.10% | 14.70% | 0.33 | 1.98E-25 |
| SLC3A2   | EC | 81.30% | 75.70% | 0.40 | 2.90E-25 |
| HES1     | EC | 65.00% | 48.20% | 0.61 | 3.23E-25 |
| MOB2     | EC | 51.80% | 27.30% | 0.28 | 3.52E-25 |
| ODC1     | EC | 37.00% | 14.70% | 0.27 | 3.86E-25 |
| HMOX1    | EC | 60.60% | 56.00% | 0.59 | 1.35E-24 |
| TCEB1    | EC | 80.10% | 78.90% | 0.27 | 1.50E-24 |
| HAPLN3   | EC | 43.00% | 17.80% | 0.30 | 2.04E-24 |
| MBNL2    | EC | 45.90% | 21.60% | 0.27 | 2.19E-24 |
| SNAI1    | EC | 56.00% | 32.90% | 0.39 | 3.67E-24 |
| CCND3    | EC | 47.20% | 22.60% | 0.29 | 3.85E-24 |
| SELP     | EC | 29.50% | 10.40% | 0.30 | 5.79E-24 |
| NASP     | EC | 69.90% | 55.30% | 0.35 | 1.21E-23 |
| RPL7A    | EC | 99.70% | 99.30% | 0.25 | 1.52E-23 |
| PLA2G16  | EC | 60.60% | 35.00% | 0.32 | 1.62E-23 |
| PRPF4B   | EC | 62.40% | 42.10% | 0.32 | 1.95E-23 |
| UBXN1    | EC | 82.60% | 72.10% | 0.29 | 2.29E-23 |
| HMGB1    | EC | 98.70% | 96.80% | 0.28 | 3.44E-23 |



|          |    |        |        |      |          |
|----------|----|--------|--------|------|----------|
| UBE2J1   | EC | 56.00% | 37.40% | 0.29 | 3.74E-23 |
| RAB5C    | EC | 75.90% | 66.30% | 0.29 | 4.54E-23 |
| FABP4    | EC | 12.40% | 1.50%  | 0.53 | 8.08E-23 |
| ELF2     | EC | 56.70% | 35.00% | 0.31 | 8.46E-23 |
| CSNK1A1  | EC | 79.30% | 74.20% | 0.29 | 8.84E-23 |
| SNHG8    | EC | 79.80% | 71.40% | 0.32 | 9.64E-23 |
| ERBB2IP  | EC | 43.50% | 19.90% | 0.26 | 9.91E-23 |
| PAK2     | EC | 66.10% | 45.20% | 0.31 | 1.13E-22 |
| MYCBP2   | EC | 63.50% | 39.50% | 0.32 | 1.30E-22 |
| FILIP1   | EC | 41.70% | 18.60% | 0.35 | 1.49E-22 |
| HSPB1    | EC | 98.20% | 94.40% | 0.34 | 1.60E-22 |
| SLC25A25 | EC | 37.60% | 20.20% | 0.28 | 1.65E-22 |
| SEPW1    | EC | 82.40% | 75.80% | 0.30 | 2.48E-22 |
| RORA     | EC | 60.60% | 44.30% | 0.34 | 4.65E-22 |
| PHF14    | EC | 54.40% | 33.50% | 0.30 | 8.40E-22 |
| GUK1     | EC | 93.80% | 90.60% | 0.27 | 1.78E-21 |
| FOSL2    | EC | 57.30% | 39.30% | 0.33 | 2.05E-21 |
| GBP2     | EC | 51.00% | 35.80% | 0.27 | 2.58E-21 |
| PLSCR1   | EC | 62.20% | 41.20% | 0.34 | 2.67E-21 |
| DLC1     | EC | 59.10% | 42.40% | 0.32 | 3.38E-21 |
| CTNNB1   | EC | 75.10% | 61.20% | 0.38 | 3.74E-21 |
| C9orf3   | EC | 62.70% | 40.60% | 0.31 | 3.77E-21 |
| ODF2L    | EC | 43.30% | 22.50% | 0.26 | 4.67E-21 |
| LRRC8A   | EC | 40.20% | 18.90% | 0.26 | 5.04E-21 |
| MAP1LC3B | EC | 86.00% | 82.40% | 0.27 | 6.46E-21 |
| MYO6     | EC | 45.30% | 25.60% | 0.26 | 6.49E-21 |
| OAZ2     | EC | 68.70% | 58.60% | 0.28 | 1.90E-20 |
| POLE4    | EC | 64.20% | 46.50% | 0.29 | 2.20E-20 |
| SCAF11   | EC | 69.70% | 56.50% | 0.31 | 3.37E-20 |
| SAV1     | EC | 43.80% | 24.50% | 0.27 | 8.32E-20 |
| XIST     | EC | 59.30% | 44.20% | 0.44 | 1.43E-19 |
| SPAG9    | EC | 74.10% | 61.20% | 0.32 | 1.62E-19 |
| PTPRG    | EC | 41.70% | 22.00% | 0.26 | 1.78E-19 |
| FAM13C   | EC | 38.60% | 17.00% | 0.27 | 1.82E-19 |
| SETD5    | EC | 49.20% | 26.60% | 0.26 | 1.89E-19 |
| ABCE1    | EC | 49.50% | 28.60% | 0.27 | 1.95E-19 |
| ATRX     | EC | 76.90% | 57.10% | 0.30 | 2.72E-19 |
| LIMS1    | EC | 69.70% | 58.70% | 0.29 | 3.07E-19 |
| TAPBP    | EC | 64.50% | 48.90% | 0.29 | 3.72E-19 |
| MSX1     | EC | 36.00% | 16.30% | 0.25 | 4.53E-19 |
| RNPS1    | EC | 67.40% | 52.80% | 0.27 | 4.90E-19 |

|             |    |        |        |      |          |
|-------------|----|--------|--------|------|----------|
| SERTAD4-AS1 | EC | 48.40% | 26.90% | 0.28 | 8.19E-19 |
| ARID4B      | EC | 74.60% | 61.60% | 0.31 | 1.09E-18 |
| MIDN        | EC | 67.10% | 53.00% | 0.33 | 1.26E-18 |
| TPM4        | EC | 88.10% | 80.30% | 0.29 | 1.59E-18 |
| CBLB        | EC | 40.20% | 20.10% | 0.26 | 1.82E-18 |
| IRF7        | EC | 43.00% | 23.70% | 0.27 | 2.05E-18 |
| CALM1       | EC | 97.70% | 96.80% | 0.30 | 3.67E-18 |
| CEBPG       | EC | 49.20% | 29.90% | 0.27 | 3.79E-18 |
| FOXP1       | EC | 74.60% | 63.70% | 0.30 | 6.28E-18 |
| RCAN1       | EC | 72.00% | 51.50% | 0.42 | 6.63E-18 |
| GNAQ        | EC | 52.10% | 28.30% | 0.27 | 1.33E-17 |
| PRRC2C      | EC | 78.50% | 73.10% | 0.25 | 2.01E-17 |
| GNG5        | EC | 88.90% | 81.70% | 0.27 | 2.71E-17 |
| ATP2B1      | EC | 73.30% | 49.00% | 0.27 | 3.28E-17 |
| NAP1L1      | EC | 90.90% | 87.80% | 0.26 | 4.00E-17 |
| ARHGEF12    | EC | 50.30% | 30.70% | 0.26 | 4.67E-17 |
| PLS3        | EC | 73.10% | 54.70% | 0.32 | 6.17E-17 |
| ISG15       | EC | 52.80% | 29.80% | 0.33 | 7.13E-17 |
| CTNNA1      | EC | 70.20% | 58.90% | 0.26 | 1.08E-16 |
| DDX17       | EC | 68.40% | 53.80% | 0.29 | 1.16E-16 |
| DDX46       | EC | 69.20% | 54.10% | 0.28 | 1.17E-16 |
| PLEKHB2     | EC | 53.60% | 32.30% | 0.28 | 1.46E-16 |
| C9orf16     | EC | 76.40% | 67.70% | 0.26 | 1.77E-16 |
| G3BP1       | EC | 61.40% | 44.20% | 0.27 | 4.00E-16 |
| EGLN2       | EC | 51.30% | 32.10% | 0.25 | 6.72E-16 |
| PLIN2       | EC | 52.10% | 30.20% | 0.28 | 7.28E-16 |
| POLR1D      | EC | 71.50% | 54.90% | 0.25 | 2.70E-15 |
| ARPP19      | EC | 52.60% | 35.70% | 0.25 | 3.36E-15 |
| PPP2R2A     | EC | 54.90% | 36.50% | 0.25 | 4.60E-15 |
| BAZ1A       | EC | 69.90% | 56.50% | 0.30 | 1.03E-14 |
| SRSF11      | EC | 74.60% | 64.20% | 0.26 | 5.11E-14 |
| RN7SL1      | EC | 27.50% | 10.80% | 0.26 | 6.68E-14 |
| FKBP9       | EC | 62.20% | 40.70% | 0.27 | 1.25E-13 |
| MTRNR2L8    | EC | 69.70% | 64.10% | 0.36 | 1.28E-13 |
| DNTTIP2     | EC | 62.20% | 41.60% | 0.26 | 2.49E-13 |
| N4BP2L2     | EC | 74.40% | 61.00% | 0.27 | 2.56E-13 |
| CLIC4       | EC | 65.80% | 53.40% | 0.25 | 7.24E-13 |
| SKIL        | EC | 67.90% | 52.40% | 0.29 | 1.38E-12 |
| C1orf54     | EC | 45.10% | 29.50% | 0.27 | 2.30E-12 |
| TRIB1       | EC | 47.70% | 28.70% | 0.27 | 3.09E-12 |
| TAF1D       | EC | 69.90% | 55.40% | 0.26 | 5.58E-12 |

|          |     |         |        |      |           |
|----------|-----|---------|--------|------|-----------|
| HMG1     | EC  | 72.80%  | 60.40% | 0.26 | 5.77E-12  |
| TXNRD1   | EC  | 49.00%  | 32.00% | 0.29 | 2.29E-11  |
| VMP1     | EC  | 65.80%  | 59.30% | 0.26 | 2.84E-11  |
| MTRNR2L2 | EC  | 79.80%  | 80.70% | 0.39 | 4.97E-09  |
| HSPA1A   | EC  | 71.00%  | 67.40% | 0.37 | 1.14E-08  |
| DNAJA1   | EC  | 92.20%  | 90.70% | 0.26 | 1.53E-08  |
| PDLIM3   | EC  | 69.40%  | 54.20% | 0.26 | 1.62E-07  |
| IGFBP3   | EC  | 14.00%  | 6.00%  | 0.25 | 3.43E-07  |
| 7SK.2    | EC  | 26.40%  | 20.30% | 0.33 | 4.15E-06  |
| ADAMTS1  | EC  | 59.80%  | 42.40% | 0.26 | 5.82E-06  |
| SPP1     | EC  | 15.80%  | 9.50%  | 0.41 | 7.03E-06  |
| HSPA1B   | EC  | 57.30%  | 53.80% | 0.27 | 1.48E-04  |
| RGS5     | SMC | 95.10%  | 4.90%  | 3.44 | 0.00E+00  |
| ACTA2    | SMC | 93.10%  | 16.40% | 3.19 | 0.00E+00  |
| TAGLN    | SMC | 99.70%  | 38.80% | 2.78 | 0.00E+00  |
| TPM2     | SMC | 96.00%  | 43.70% | 2.23 | 0.00E+00  |
| IGFBP7   | SMC | 99.70%  | 63.70% | 2.10 | 0.00E+00  |
| MYL9     | SMC | 97.10%  | 64.20% | 1.93 | 0.00E+00  |
| COL4A1   | SMC | 82.20%  | 28.80% | 1.84 | 0.00E+00  |
| COL18A1  | SMC | 93.70%  | 24.40% | 1.74 | 0.00E+00  |
| COL4A2   | SMC | 86.00%  | 32.70% | 1.68 | 0.00E+00  |
| TPM1     | SMC | 92.80%  | 41.50% | 1.61 | 0.00E+00  |
| PPP1R14A | SMC | 73.40%  | 0.80%  | 1.58 | 0.00E+00  |
| TINAGL1  | SMC | 80.80%  | 3.00%  | 1.58 | 0.00E+00  |
| CALD1    | SMC | 100.00% | 83.60% | 1.55 | 0.00E+00  |
| NOTCH3   | SMC | 84.00%  | 5.40%  | 1.47 | 0.00E+00  |
| MAP1B    | SMC | 88.80%  | 25.70% | 1.40 | 1.53E-292 |
| MYLK     | SMC | 70.20%  | 3.60%  | 1.27 | 6.94E-290 |
| GJA4     | SMC | 63.90%  | 1.00%  | 1.11 | 1.60E-289 |
| MCAM     | SMC | 72.50%  | 4.30%  | 1.43 | 6.20E-287 |
| A2M      | SMC | 93.40%  | 20.30% | 1.64 | 1.03E-280 |
| ADAMTS4  | SMC | 65.60%  | 9.70%  | 1.38 | 2.00E-269 |
| COX4I2   | SMC | 54.70%  | 0.70%  | 1.02 | 2.08E-255 |
| EPS8     | SMC | 83.10%  | 45.50% | 0.97 | 7.90E-252 |
| CHN1     | SMC | 61.90%  | 2.90%  | 0.99 | 4.71E-242 |
| CSRP1    | SMC | 77.90%  | 56.40% | 1.01 | 4.94E-242 |
| MYH11    | SMC | 49.60%  | 1.90%  | 1.70 | 7.74E-220 |
| LPP      | SMC | 80.80%  | 43.60% | 0.93 | 7.76E-213 |
| NR2F2    | SMC | 65.30%  | 13.90% | 1.02 | 8.27E-208 |
| ITGA7    | SMC | 50.40%  | 1.60%  | 0.69 | 4.11E-206 |
| PPP1R12A | SMC | 77.70%  | 46.90% | 0.90 | 9.68E-206 |

|             |     |         |        |      |           |
|-------------|-----|---------|--------|------|-----------|
| LG14        | SMC | 58.50%  | 5.70%  | 1.07 | 6.35E-203 |
| SEP4        | SMC | 54.40%  | 3.10%  | 0.76 | 1.52E-194 |
| SEP4        | SMC | 44.10%  | 2.30%  | 0.96 | 5.33E-184 |
| GPR116      | SMC | 54.20%  | 2.40%  | 0.79 | 8.10E-183 |
| SYNPO2      | SMC | 54.40%  | 5.70%  | 0.88 | 7.09E-180 |
| HIGD1B      | SMC | 38.70%  | 0.70%  | 0.85 | 1.68E-174 |
| ABCC9       | SMC | 52.40%  | 3.10%  | 0.77 | 4.90E-170 |
| EPAS1       | SMC | 76.80%  | 25.60% | 0.94 | 5.93E-168 |
| CNN1        | SMC | 39.00%  | 1.00%  | 1.09 | 1.29E-167 |
| ITGA1       | SMC | 57.90%  | 10.40% | 0.78 | 4.62E-164 |
| SPARCL1     | SMC | 100.00% | 75.90% | 1.19 | 7.50E-164 |
| MYO1B       | SMC | 65.60%  | 27.10% | 0.77 | 2.87E-163 |
| KCNE4       | SMC | 63.30%  | 21.30% | 1.22 | 5.69E-162 |
| C20orf27    | SMC | 58.70%  | 26.30% | 0.72 | 5.99E-162 |
| CDH6        | SMC | 35.50%  | 0.30%  | 0.52 | 7.16E-159 |
| FAM162B     | SMC | 34.10%  | 0.30%  | 0.50 | 7.91E-155 |
| CCDC102B    | SMC | 44.70%  | 2.30%  | 0.66 | 5.81E-154 |
| SEPT7       | SMC | 95.40%  | 82.70% | 0.81 | 2.01E-153 |
| PLN         | SMC | 34.70%  | 0.60%  | 0.97 | 1.02E-147 |
| ANGPT2      | SMC | 53.90%  | 4.60%  | 1.03 | 1.65E-146 |
| SSTR2       | SMC | 37.20%  | 1.40%  | 0.72 | 1.83E-142 |
| ISYNA1      | SMC | 53.90%  | 9.40%  | 0.75 | 9.09E-142 |
| GJC1        | SMC | 39.00%  | 2.20%  | 0.55 | 4.05E-138 |
| MYH9        | SMC | 79.90%  | 42.50% | 0.79 | 3.50E-136 |
| CD36        | SMC | 47.60%  | 4.40%  | 1.18 | 3.61E-134 |
| NDRG2       | SMC | 64.80%  | 23.20% | 0.71 | 1.02E-130 |
| EDNRB       | SMC | 46.10%  | 3.20%  | 0.95 | 2.43E-130 |
| SGIP1       | SMC | 46.10%  | 6.00%  | 0.62 | 5.66E-129 |
| GUCY1A3     | SMC | 51.90%  | 5.90%  | 0.69 | 3.47E-127 |
| ENPEP       | SMC | 30.10%  | 0.40%  | 0.42 | 3.73E-127 |
| ESAM        | SMC | 50.40%  | 5.10%  | 0.58 | 1.85E-126 |
| ITGB1       | SMC | 97.10%  | 86.60% | 0.72 | 5.06E-126 |
| STOM        | SMC | 82.80%  | 48.30% | 0.78 | 9.97E-125 |
| KCNJ8       | SMC | 35.20%  | 1.70%  | 0.55 | 3.23E-123 |
| GGT5        | SMC | 67.60%  | 13.30% | 0.95 | 2.28E-119 |
| MRVI1       | SMC | 29.20%  | 0.40%  | 0.42 | 4.44E-118 |
| EFHD1       | SMC | 32.40%  | 1.50%  | 0.46 | 6.24E-118 |
| MTUS1       | SMC | 59.60%  | 22.60% | 0.83 | 2.14E-113 |
| CPE         | SMC | 48.70%  | 6.10%  | 0.77 | 6.11E-112 |
| MIR4435-1HG | SMC | 69.30%  | 42.40% | 0.94 | 4.99E-109 |
| FLNA        | SMC | 79.10%  | 57.20% | 0.84 | 1.03E-108 |

|               |     |        |        |      |           |
|---------------|-----|--------|--------|------|-----------|
| THY1          | SMC | 78.50% | 57.40% | 1.12 | 2.09E-108 |
| PGF           | SMC | 59.00% | 13.20% | 0.82 | 5.15E-107 |
| PPP1R12B      | SMC | 35.50% | 5.30%  | 0.58 | 5.22E-107 |
| EBF2          | SMC | 45.30% | 5.40%  | 0.53 | 1.02E-105 |
| SLC25A5       | SMC | 91.10% | 80.60% | 0.64 | 1.09E-104 |
| CYP26B1       | SMC | 34.40% | 3.60%  | 0.59 | 2.17E-104 |
| PALLD         | SMC | 62.80% | 27.00% | 0.65 | 3.32E-103 |
| FBLIM1        | SMC | 39.00% | 3.50%  | 0.50 | 5.14E-103 |
| GUCY1B3       | SMC | 40.40% | 3.40%  | 0.49 | 6.68E-103 |
| MT1A          | SMC | 74.80% | 45.20% | 1.40 | 8.93E-103 |
| ACTN4         | SMC | 73.40% | 51.00% | 0.65 | 1.72E-102 |
| FAM213A       | SMC | 40.70% | 5.90%  | 0.60 | 1.34E-101 |
| CYFIP2        | SMC | 27.80% | 1.40%  | 0.54 | 7.80E-101 |
| SCN4B         | SMC | 25.20% | 0.50%  | 0.35 | 2.19E-100 |
| FILIP1L       | SMC | 77.90% | 42.30% | 0.89 | 2.21E-100 |
| OAZ2          | SMC | 73.90% | 58.40% | 0.56 | 3.12E-100 |
| PARM1         | SMC | 38.10% | 4.00%  | 0.49 | 7.04E-100 |
| DNAJB4        | SMC | 56.70% | 34.00% | 0.68 | 7.58E-100 |
| TGFB111       | SMC | 66.20% | 37.50% | 0.64 | 8.23E-99  |
| AOC3          | SMC | 31.80% | 3.10%  | 0.58 | 9.67E-99  |
| ADIRF         | SMC | 99.40% | 88.30% | 0.95 | 2.57E-98  |
| FHL5          | SMC | 21.80% | 0.10%  | 0.38 | 5.11E-98  |
| RBPMS         | SMC | 45.80% | 11.00% | 0.54 | 7.90E-97  |
| GUCY1A2       | SMC | 28.10% | 0.90%  | 0.35 | 3.52E-95  |
| LHFP          | SMC | 91.40% | 64.00% | 0.78 | 2.00E-94  |
| CRISPLD2      | SMC | 66.20% | 29.80% | 0.85 | 8.05E-94  |
| NCKAP5        | SMC | 26.90% | 0.80%  | 0.41 | 2.66E-93  |
| ARHGAP15      | SMC | 36.10% | 2.40%  | 0.47 | 7.58E-92  |
| VCL           | SMC | 60.70% | 31.60% | 0.58 | 1.01E-91  |
| BCAM          | SMC | 44.40% | 5.00%  | 0.76 | 2.36E-91  |
| RP11-332H18.4 | SMC | 22.10% | 0.30%  | 0.34 | 6.87E-91  |
| PTK2          | SMC | 43.00% | 14.90% | 0.55 | 1.31E-90  |
| LINC00152     | SMC | 72.50% | 47.40% | 0.83 | 3.34E-90  |
| CSRP2         | SMC | 49.60% | 14.30% | 0.74 | 9.64E-90  |
| KRT18         | SMC | 36.10% | 3.60%  | 0.65 | 1.25E-89  |
| CPM           | SMC | 55.30% | 10.00% | 0.72 | 1.56E-89  |
| PHLDA1        | SMC | 83.40% | 64.50% | 0.88 | 2.05E-88  |
| UTRN          | SMC | 63.00% | 25.80% | 0.64 | 2.54E-88  |
| TFPI          | SMC | 73.10% | 45.10% | 0.69 | 5.77E-88  |
| LPL           | SMC | 29.50% | 1.80%  | 0.54 | 8.93E-86  |
| FRZB          | SMC | 36.40% | 3.40%  | 0.63 | 1.96E-85  |

|          |     |         |        |      |          |
|----------|-----|---------|--------|------|----------|
| PTMA     | SMC | 100.00% | 99.90% | 0.50 | 2.75E-85 |
| CCL8     | SMC | 32.10%  | 4.60%  | 1.32 | 2.35E-84 |
| PDE5A    | SMC | 38.70%  | 6.60%  | 0.51 | 5.51E-84 |
| LPPR4    | SMC | 20.30%  | 0.30%  | 0.29 | 8.80E-83 |
| DDX21    | SMC | 80.50%  | 72.80% | 0.63 | 6.42E-82 |
| RNF152   | SMC | 29.80%  | 2.10%  | 0.43 | 7.97E-82 |
| MAP2     | SMC | 24.40%  | 0.70%  | 0.31 | 1.84E-81 |
| ID4      | SMC | 44.10%  | 14.40% | 0.57 | 9.05E-81 |
| RARRES2  | SMC | 57.30%  | 12.30% | 0.71 | 2.12E-80 |
| PDLIM1   | SMC | 85.10%  | 49.50% | 0.72 | 8.51E-80 |
| UBA2     | SMC | 65.30%  | 39.50% | 0.52 | 1.52E-79 |
| EDNRA    | SMC | 28.70%  | 1.90%  | 0.39 | 2.71E-78 |
| TPM4     | SMC | 92.30%  | 80.20% | 0.60 | 1.58E-77 |
| FABP4    | SMC | 25.80%  | 1.00%  | 0.76 | 1.82E-77 |
| NEXN     | SMC | 41.00%  | 11.10% | 0.60 | 8.93E-76 |
| PTP4A3   | SMC | 35.50%  | 4.20%  | 0.49 | 1.26E-75 |
| PAWR     | SMC | 26.10%  | 1.60%  | 0.33 | 1.34E-75 |
| COL5A3   | SMC | 38.40%  | 5.20%  | 0.47 | 2.31E-75 |
| ARHGDI8  | SMC | 67.60%  | 20.00% | 0.76 | 2.54E-75 |
| ACTN1    | SMC | 77.40%  | 42.10% | 0.66 | 3.29E-74 |
| ARHGEF17 | SMC | 33.00%  | 4.70%  | 0.39 | 9.30E-74 |
| MLTK     | SMC | 62.50%  | 37.30% | 0.53 | 1.59E-73 |
| INPP4B   | SMC | 28.10%  | 3.50%  | 0.39 | 2.47E-73 |
| UACA     | SMC | 65.00%  | 37.90% | 0.61 | 7.63E-73 |
| C1QTNF1  | SMC | 58.20%  | 25.50% | 0.55 | 9.76E-73 |
| APOLD1   | SMC | 39.30%  | 6.10%  | 0.56 | 7.67E-72 |
| FRMD3    | SMC | 26.90%  | 2.00%  | 0.30 | 8.39E-72 |
| SYTL2    | SMC | 44.40%  | 17.30% | 0.51 | 1.34E-71 |
| ARHGAP29 | SMC | 56.40%  | 14.50% | 0.61 | 1.37E-70 |
| NID1     | SMC | 38.70%  | 6.50%  | 0.46 | 1.62E-70 |
| DUSP14   | SMC | 64.80%  | 48.70% | 0.56 | 4.87E-70 |
| IGFBP2   | SMC | 24.60%  | 1.40%  | 0.33 | 1.36E-69 |
| NPNT     | SMC | 22.60%  | 0.90%  | 0.28 | 2.09E-69 |
| PRKG1    | SMC | 27.20%  | 2.50%  | 0.37 | 3.45E-69 |
| HLA-B    | SMC | 98.90%  | 98.10% | 0.57 | 3.87E-69 |
| TBX2     | SMC | 19.20%  | 0.50%  | 0.27 | 6.52E-69 |
| LDHB     | SMC | 77.40%  | 57.20% | 0.54 | 7.10E-68 |
| PCSK7    | SMC | 48.70%  | 22.40% | 0.53 | 1.65E-66 |
| MYL12A   | SMC | 93.70%  | 90.90% | 0.54 | 1.73E-65 |
| SORBS2   | SMC | 32.40%  | 35.20% | 0.45 | 1.76E-65 |
| DLX5     | SMC | 29.20%  | 4.00%  | 0.45 | 2.93E-65 |

|              |     |        |        |      |          |
|--------------|-----|--------|--------|------|----------|
| IFITM3       | SMC | 98.30% | 92.90% | 0.53 | 3.88E-65 |
| RCAN2        | SMC | 23.80% | 1.50%  | 0.37 | 4.44E-65 |
| CAV1         | SMC | 96.60% | 80.20% | 0.63 | 3.70E-64 |
| SMTN         | SMC | 46.40% | 23.00% | 0.44 | 9.43E-64 |
| EHD2         | SMC | 57.00% | 31.20% | 0.50 | 3.23E-63 |
| NCL          | SMC | 90.50% | 88.30% | 0.55 | 1.20E-62 |
| EIF4A1       | SMC | 98.00% | 97.60% | 0.61 | 1.49E-61 |
| NEURL1B      | SMC | 23.20% | 1.40%  | 0.29 | 4.59E-61 |
| CCL2         | SMC | 82.80% | 70.00% | 1.23 | 3.26E-60 |
| ANO1         | SMC | 43.30% | 11.20% | 0.46 | 4.77E-60 |
| CRIM1        | SMC | 45.60% | 18.20% | 0.52 | 1.49E-59 |
| NGF          | SMC | 31.80% | 7.90%  | 0.53 | 2.06E-59 |
| HOPX         | SMC | 21.80% | 1.10%  | 0.33 | 7.38E-59 |
| ADAMTS1      | SMC | 71.90% | 42.10% | 0.81 | 9.92E-59 |
| SPARC        | SMC | 93.40% | 82.90% | 0.78 | 1.49E-58 |
| SEZ6L2       | SMC | 21.20% | 1.40%  | 0.26 | 1.94E-58 |
| DLC1         | SMC | 63.30% | 42.30% | 0.51 | 6.40E-58 |
| ADAMTS9      | SMC | 33.50% | 4.80%  | 0.49 | 1.23E-57 |
| OLFML2B      | SMC | 59.30% | 28.30% | 0.61 | 1.63E-57 |
| JAG1         | SMC | 41.50% | 12.20% | 0.49 | 1.75E-57 |
| PFKFB3       | SMC | 52.40% | 30.00% | 0.52 | 1.76E-56 |
| CAV2         | SMC | 62.50% | 38.40% | 0.52 | 4.92E-56 |
| MFGE8        | SMC | 89.70% | 66.70% | 0.63 | 2.68E-55 |
| KCNMB1       | SMC | 27.20% | 3.60%  | 0.40 | 3.25E-54 |
| PDGFRB       | SMC | 67.90% | 38.20% | 0.61 | 3.73E-54 |
| CHSY1        | SMC | 45.30% | 23.60% | 0.43 | 4.54E-54 |
| RPS7         | SMC | 98.30% | 99.00% | 0.38 | 5.49E-54 |
| KLF9         | SMC | 65.90% | 47.00% | 0.50 | 7.97E-54 |
| CTD-3193K9.4 | SMC | 20.90% | 1.90%  | 0.30 | 8.90E-54 |
| MSRB3        | SMC | 46.10% | 24.10% | 0.45 | 1.51E-53 |
| MAP3K7CL     | SMC | 20.60% | 3.80%  | 0.35 | 1.64E-53 |
| MIR143HG     | SMC | 14.00% | 0.30%  | 0.32 | 2.21E-53 |
| RPL3         | SMC | 99.10% | 99.70% | 0.39 | 1.09E-52 |
| MTHFD2       | SMC | 70.20% | 47.50% | 0.55 | 1.21E-52 |
| ROCK1        | SMC | 73.40% | 54.30% | 0.47 | 1.93E-52 |
| MAT2A        | SMC | 71.10% | 56.40% | 0.61 | 5.31E-52 |
| HNRNPA1      | SMC | 95.70% | 96.70% | 0.41 | 1.65E-51 |
| CNN3         | SMC | 87.70% | 67.40% | 0.57 | 1.65E-51 |
| ANXA6        | SMC | 68.80% | 47.30% | 0.47 | 2.07E-51 |
| ITIH5        | SMC | 40.40% | 14.80% | 0.50 | 2.19E-51 |
| FMO3         | SMC | 19.50% | 1.20%  | 0.33 | 3.30E-51 |

|          |     |         |         |      |          |
|----------|-----|---------|---------|------|----------|
| ADRA2A   | SMC | 16.90%  | 1.40%   | 0.30 | 4.91E-51 |
| IFI16    | SMC | 82.20%  | 69.40%  | 0.60 | 5.55E-51 |
| RPS8     | SMC | 99.10%  | 99.70%  | 0.40 | 9.44E-51 |
| RPS19    | SMC | 98.90%  | 99.60%  | 0.38 | 1.18E-50 |
| FABP5    | SMC | 58.50%  | 20.80%  | 0.68 | 2.40E-50 |
| SIK1     | SMC | 41.30%  | 16.50%  | 0.48 | 7.48E-50 |
| CLMN     | SMC | 25.20%  | 4.50%   | 0.34 | 2.07E-48 |
| IFITM2   | SMC | 96.60%  | 87.60%  | 0.52 | 2.54E-48 |
| C11orf96 | SMC | 71.30%  | 40.10%  | 0.61 | 5.41E-48 |
| NPM1     | SMC | 97.40%  | 96.40%  | 0.49 | 6.81E-48 |
| SNCG     | SMC | 25.50%  | 12.70%  | 0.57 | 1.42E-47 |
| RASL12   | SMC | 22.10%  | 4.30%   | 0.33 | 2.90E-47 |
| RERGL    | SMC | 11.50%  | 0.20%   | 0.58 | 3.44E-47 |
| CALM2    | SMC | 98.60%  | 97.90%  | 0.45 | 3.74E-47 |
| SARS     | SMC | 65.60%  | 52.70%  | 0.39 | 4.14E-47 |
| NOP16    | SMC | 58.70%  | 36.70%  | 0.50 | 1.05E-46 |
| RPL5     | SMC | 98.60%  | 99.30%  | 0.37 | 1.27E-46 |
| HLA-A    | SMC | 98.90%  | 98.20%  | 0.43 | 1.50E-46 |
| PLEKHA4  | SMC | 61.30%  | 38.60%  | 0.46 | 2.40E-46 |
| SLC25A6  | SMC | 95.70%  | 94.90%  | 0.41 | 5.91E-46 |
| BST2     | SMC | 65.30%  | 27.30%  | 0.57 | 8.28E-46 |
| GPRC5C   | SMC | 28.70%  | 9.60%   | 0.36 | 1.34E-45 |
| NAP1L1   | SMC | 91.70%  | 87.80%  | 0.42 | 3.46E-45 |
| CD59     | SMC | 90.50%  | 82.00%  | 0.51 | 4.65E-45 |
| SLIT3    | SMC | 40.40%  | 13.20%  | 0.46 | 1.48E-44 |
| ARHGEF25 | SMC | 19.50%  | 2.70%   | 0.26 | 2.67E-44 |
| STEAP4   | SMC | 60.70%  | 26.80%  | 0.72 | 3.14E-44 |
| SERBP1   | SMC | 88.00%  | 83.50%  | 0.41 | 6.57E-44 |
| C12orf44 | SMC | 61.30%  | 46.10%  | 0.38 | 1.26E-43 |
| RPS16    | SMC | 99.10%  | 99.40%  | 0.34 | 2.08E-43 |
| COBLL1   | SMC | 43.60%  | 19.20%  | 0.40 | 2.87E-43 |
| DMD      | SMC | 19.80%  | 2.20%   | 0.27 | 1.49E-42 |
| SLC7A2   | SMC | 51.90%  | 20.00%  | 0.33 | 2.41E-42 |
| PABPC1   | SMC | 94.30%  | 92.90%  | 0.39 | 4.48E-42 |
| NOP56    | SMC | 66.80%  | 54.50%  | 0.41 | 4.50E-42 |
| MALAT1   | SMC | 100.00% | 100.00% | 0.32 | 9.70E-42 |
| OLFML2A  | SMC | 27.80%  | 5.20%   | 0.37 | 1.40E-41 |
| CTSC     | SMC | 43.00%  | 13.40%  | 0.58 | 1.57E-41 |
| MPRIP    | SMC | 39.00%  | 15.00%  | 0.36 | 1.84E-41 |
| ADAMTS12 | SMC | 21.80%  | 2.50%   | 0.25 | 2.72E-41 |
| PTRF     | SMC | 93.40%  | 79.10%  | 0.53 | 3.76E-41 |



|         |     |        |        |      |          |
|---------|-----|--------|--------|------|----------|
| SOD3    | SMC | 44.10% | 25.10% | 0.70 | 3.99E-41 |
| PDGFA   | SMC | 48.70% | 23.20% | 0.48 | 6.25E-41 |
| A1BG    | SMC | 34.10% | 7.30%  | 0.33 | 1.08E-40 |
| PAG1    | SMC | 28.10% | 4.70%  | 0.34 | 3.58E-40 |
| PRKAR1A | SMC | 71.60% | 62.40% | 0.37 | 5.02E-40 |
| TBC1D1  | SMC | 37.50% | 13.30% | 0.37 | 5.67E-40 |
| KANK2   | SMC | 54.20% | 34.50% | 0.41 | 8.77E-40 |
| MRPL32  | SMC | 67.30% | 56.30% | 0.41 | 1.21E-39 |
| FHL2    | SMC | 55.60% | 33.00% | 0.54 | 1.24E-39 |
| RSL1D1  | SMC | 76.50% | 68.60% | 0.40 | 4.01E-39 |
| EIF5B   | SMC | 77.10% | 69.60% | 0.40 | 5.53E-39 |
| ASAP1   | SMC | 48.70% | 23.30% | 0.43 | 7.80E-39 |
| THBS1   | SMC | 46.40% | 16.90% | 0.57 | 1.22E-38 |
| TLN1    | SMC | 65.60% | 50.10% | 0.39 | 1.25E-38 |
| LRRC32  | SMC | 37.50% | 9.80%  | 0.37 | 2.06E-38 |
| NGFR    | SMC | 22.30% | 3.80%  | 0.37 | 2.55E-38 |
| LURAP1L | SMC | 21.80% | 3.90%  | 0.26 | 3.49E-38 |
| GPM6B   | SMC | 31.50% | 7.60%  | 0.37 | 6.68E-38 |
| SLC2A3  | SMC | 61.60% | 34.00% | 0.52 | 6.73E-38 |
| HLA-C   | SMC | 98.60% | 97.40% | 0.44 | 8.32E-38 |
| TNS1    | SMC | 59.90% | 39.70% | 0.45 | 1.14E-37 |
| TUBA1B  | SMC | 96.80% | 96.20% | 0.46 | 1.53E-37 |
| MEF2C   | SMC | 53.90% | 21.00% | 0.44 | 1.57E-37 |
| PDLIM3  | SMC | 67.30% | 54.30% | 0.50 | 2.56E-37 |
| TOP1    | SMC | 65.30% | 53.60% | 0.41 | 8.07E-37 |
| ATF4    | SMC | 95.40% | 92.30% | 0.42 | 1.02E-36 |
| HIPK2   | SMC | 38.10% | 17.50% | 0.35 | 1.10E-36 |
| RPL23A  | SMC | 99.10% | 99.80% | 0.28 | 1.21E-36 |
| HEXIM1  | SMC | 79.40% | 71.40% | 0.47 | 2.97E-36 |
| SLC1A5  | SMC | 47.30% | 36.30% | 0.36 | 7.26E-36 |
| NES     | SMC | 23.50% | 3.40%  | 0.30 | 8.29E-36 |
| SLN     | SMC | 30.70% | 11.20% | 0.87 | 1.00E-34 |
| EGFLAM  | SMC | 33.00% | 8.90%  | 0.33 | 1.20E-34 |
| ARID5B  | SMC | 91.10% | 77.30% | 0.52 | 1.54E-34 |
| RPL35   | SMC | 98.60% | 99.50% | 0.27 | 1.83E-34 |
| U2AF1   | SMC | 78.20% | 77.10% | 0.34 | 2.37E-34 |
| PLK2    | SMC | 48.70% | 26.30% | 0.54 | 3.74E-34 |
| FAU     | SMC | 98.90% | 99.60% | 0.26 | 3.91E-34 |
| HSPD1   | SMC | 78.20% | 71.90% | 0.40 | 9.86E-34 |
| VMP1    | SMC | 71.60% | 59.10% | 0.43 | 1.20E-33 |
| CHD1    | SMC | 67.00% | 57.00% | 0.42 | 1.74E-33 |

|          |     |         |         |      |          |
|----------|-----|---------|---------|------|----------|
| HNRNPF   | SMC | 74.20%  | 66.40%  | 0.38 | 3.78E-33 |
| RASGRP2  | SMC | 21.20%  | 3.40%   | 0.26 | 6.01E-33 |
| RPL10A   | SMC | 99.40%  | 99.40%  | 0.32 | 6.52E-33 |
| ZNF703   | SMC | 47.00%  | 26.80%  | 0.40 | 9.82E-33 |
| RAN      | SMC | 86.00%  | 86.70%  | 0.34 | 1.10E-32 |
| PA2G4    | SMC | 74.50%  | 67.60%  | 0.34 | 1.18E-32 |
| PFDN2    | SMC | 71.60%  | 67.30%  | 0.31 | 3.91E-32 |
| B2M      | SMC | 100.00% | 100.00% | 0.30 | 5.19E-32 |
| CCT2     | SMC | 64.80%  | 52.30%  | 0.35 | 5.44E-32 |
| RPL18    | SMC | 98.60%  | 99.30%  | 0.29 | 8.50E-32 |
| SNHG15   | SMC | 53.00%  | 36.70%  | 0.37 | 1.05E-31 |
| HNRNPK   | SMC | 91.10%  | 89.90%  | 0.34 | 2.86E-31 |
| PVRL2    | SMC | 54.70%  | 30.40%  | 0.39 | 3.15E-31 |
| RASAL2   | SMC | 28.10%  | 11.60%  | 0.30 | 3.25E-31 |
| RPL37A   | SMC | 100.00% | 99.90%  | 0.27 | 2.29E-30 |
| PRMT1    | SMC | 65.60%  | 52.50%  | 0.34 | 2.64E-30 |
| ANGPT1   | SMC | 24.60%  | 5.40%   | 0.31 | 3.57E-30 |
| UQCRH    | SMC | 86.20%  | 84.00%  | 0.31 | 1.39E-29 |
| WDR43    | SMC | 53.00%  | 36.20%  | 0.38 | 2.47E-29 |
| ITGA8    | SMC | 11.70%  | 1.30%   | 0.27 | 3.03E-29 |
| ITGA3    | SMC | 18.60%  | 3.20%   | 0.25 | 3.35E-29 |
| SYNE2    | SMC | 43.30%  | 16.30%  | 0.43 | 4.56E-29 |
| TUSC3    | SMC | 28.10%  | 6.70%   | 0.26 | 4.88E-29 |
| CEBPZ    | SMC | 50.40%  | 38.80%  | 0.33 | 5.53E-29 |
| CDC42EP4 | SMC | 41.80%  | 26.00%  | 0.32 | 8.03E-29 |
| ARHGAP6  | SMC | 36.10%  | 12.00%  | 0.34 | 8.33E-29 |
| NCOA7    | SMC | 52.40%  | 40.60%  | 0.41 | 1.20E-28 |
| NASP     | SMC | 67.00%  | 55.50%  | 0.37 | 1.21E-28 |
| ATP5B    | SMC | 87.40%  | 86.70%  | 0.30 | 1.63E-28 |
| NACA     | SMC | 98.60%  | 99.20%  | 0.28 | 2.21E-28 |
| NDUFS2   | SMC | 55.00%  | 39.40%  | 0.32 | 4.46E-28 |
| HGF      | SMC | 19.80%  | 6.10%   | 0.29 | 5.03E-28 |
| UBE2N    | SMC | 68.80%  | 56.00%  | 0.33 | 1.17E-27 |
| LGALS1   | SMC | 99.10%  | 97.30%  | 0.28 | 1.31E-27 |
| ADCY3    | SMC | 28.40%  | 7.50%   | 0.26 | 1.42E-27 |
| CYGB     | SMC | 26.90%  | 7.10%   | 0.27 | 2.12E-27 |
| MYL6     | SMC | 100.00% | 99.10%  | 0.35 | 2.17E-27 |
| CDC42EP1 | SMC | 45.00%  | 22.80%  | 0.33 | 3.06E-27 |
| RSU1     | SMC | 55.90%  | 39.80%  | 0.33 | 3.92E-27 |
| FAM46A   | SMC | 71.30%  | 63.40%  | 0.50 | 3.98E-27 |
| CCT3     | SMC | 69.60%  | 59.10%  | 0.30 | 5.75E-27 |

|          |     |        |        |      |          |
|----------|-----|--------|--------|------|----------|
| RPS5     | SMC | 98.90% | 99.10% | 0.29 | 8.17E-27 |
| SEMA5A   | SMC | 37.80% | 12.70% | 0.34 | 8.42E-27 |
| ATP5G2   | SMC | 90.80% | 88.80% | 0.31 | 9.10E-27 |
| TEX41    | SMC | 29.20% | 12.90% | 0.29 | 9.41E-27 |
| F2R      | SMC | 23.20% | 4.50%  | 0.26 | 1.05E-26 |
| TMEM47   | SMC | 40.10% | 25.10% | 0.32 | 1.10E-26 |
| CSNK1A1  | SMC | 79.10% | 74.30% | 0.32 | 1.34E-26 |
| SPRY2    | SMC | 34.10% | 15.40% | 0.31 | 2.63E-26 |
| EIF3J    | SMC | 67.60% | 54.70% | 0.36 | 3.39E-26 |
| CSNK1D   | SMC | 53.00% | 35.50% | 0.34 | 4.90E-26 |
| SLC3A2   | SMC | 77.10% | 75.80% | 0.40 | 6.86E-26 |
| NR3C1    | SMC | 59.60% | 51.70% | 0.31 | 8.90E-26 |
| RPL6     | SMC | 98.60% | 99.70% | 0.25 | 8.98E-26 |
| PLAU     | SMC | 58.50% | 34.20% | 0.58 | 1.07E-25 |
| NXT1     | SMC | 53.00% | 40.20% | 0.32 | 2.98E-25 |
| ROCK2    | SMC | 44.40% | 25.20% | 0.33 | 3.10E-25 |
| FAM13C   | SMC | 36.70% | 17.20% | 0.36 | 3.51E-25 |
| NT5DC2   | SMC | 26.60% | 12.20% | 0.25 | 3.68E-25 |
| TTLL7    | SMC | 22.10% | 10.40% | 0.26 | 4.01E-25 |
| SERPINI1 | SMC | 26.10% | 13.00% | 0.29 | 4.59E-25 |
| IMPDH2   | SMC | 68.50% | 54.90% | 0.33 | 4.74E-25 |
| HNRNPA3  | SMC | 81.40% | 76.30% | 0.31 | 5.67E-25 |
| FUS      | SMC | 92.60% | 87.30% | 0.37 | 6.33E-25 |
| BRD2     | SMC | 86.00% | 82.80% | 0.37 | 7.64E-25 |
| SH3BGRL  | SMC | 87.40% | 78.90% | 0.35 | 8.78E-25 |
| IFIT3    | SMC | 28.90% | 11.40% | 0.40 | 9.52E-25 |
| COL12A1  | SMC | 44.10% | 22.60% | 0.39 | 1.12E-24 |
| FOSL2    | SMC | 52.40% | 39.50% | 0.35 | 2.87E-24 |
| KIAA0040 | SMC | 51.60% | 26.80% | 0.41 | 3.20E-24 |
| ILK      | SMC | 64.80% | 57.50% | 0.29 | 3.25E-24 |
| EIF1AX   | SMC | 79.70% | 76.90% | 0.30 | 3.39E-24 |
| SORBS3   | SMC | 39.50% | 29.60% | 0.26 | 6.81E-24 |
| CYCS     | SMC | 86.50% | 81.60% | 0.37 | 7.60E-24 |
| HSPB6    | SMC | 37.20% | 18.30% | 0.36 | 1.41E-23 |
| RPL9     | SMC | 99.10% | 99.40% | 0.26 | 1.83E-23 |
| NOLC1    | SMC | 51.30% | 35.70% | 0.34 | 2.43E-23 |
| BAZ1A    | SMC | 69.60% | 56.60% | 0.39 | 2.45E-23 |
| ETS1     | SMC | 41.80% | 19.30% | 0.36 | 2.72E-23 |
| GNL3     | SMC | 60.50% | 52.30% | 0.31 | 3.51E-23 |
| BTF3     | SMC | 97.40% | 97.80% | 0.26 | 4.46E-23 |
| PDE1A    | SMC | 40.10% | 18.40% | 0.31 | 6.02E-23 |

|         |     |        |        |      |          |
|---------|-----|--------|--------|------|----------|
| SAFB2   | SMC | 53.30% | 42.10% | 0.30 | 1.63E-22 |
| CCT5    | SMC | 62.80% | 56.90% | 0.28 | 1.65E-22 |
| RPL18A  | SMC | 99.40% | 99.70% | 0.25 | 1.75E-22 |
| RPL7A   | SMC | 99.10% | 99.30% | 0.27 | 1.85E-22 |
| LAMC1   | SMC | 47.90% | 34.60% | 0.30 | 2.00E-22 |
| EIF3A   | SMC | 72.50% | 63.90% | 0.31 | 2.59E-22 |
| BCAR1   | SMC | 31.80% | 14.20% | 0.27 | 4.56E-22 |
| RPL29   | SMC | 98.60% | 99.30% | 0.26 | 6.04E-22 |
| LBH     | SMC | 53.60% | 56.20% | 0.34 | 1.12E-21 |
| ATP1A1  | SMC | 77.90% | 71.10% | 0.31 | 1.59E-21 |
| EEF2    | SMC | 99.10% | 97.70% | 0.28 | 1.69E-21 |
| LIF     | SMC | 35.50% | 13.40% | 0.52 | 1.87E-21 |
| TOB1    | SMC | 61.30% | 52.50% | 0.34 | 3.88E-21 |
| UGCG    | SMC | 39.00% | 22.10% | 0.30 | 3.91E-21 |
| SASH1   | SMC | 40.10% | 23.10% | 0.31 | 3.97E-21 |
| HNRNPH3 | SMC | 71.60% | 64.80% | 0.29 | 5.15E-21 |
| ZBTB38  | SMC | 53.30% | 40.40% | 0.32 | 5.82E-21 |
| KIF5B   | SMC | 81.10% | 70.80% | 0.30 | 6.62E-21 |
| SEPHS2  | SMC | 50.70% | 36.90% | 0.31 | 7.27E-21 |
| LOXL2   | SMC | 40.40% | 18.60% | 0.38 | 8.21E-21 |
| SUMO2   | SMC | 94.60% | 92.40% | 0.26 | 1.13E-20 |
| RPS3A   | SMC | 98.90% | 99.60% | 0.26 | 1.41E-20 |
| LITAF   | SMC | 70.20% | 60.90% | 0.33 | 1.71E-20 |
| HNRNPDL | SMC | 86.80% | 84.50% | 0.29 | 1.95E-20 |
| SF1     | SMC | 63.90% | 51.90% | 0.30 | 2.18E-20 |
| SRSF2   | SMC | 87.70% | 83.70% | 0.32 | 2.59E-20 |
| RBM39   | SMC | 88.00% | 85.30% | 0.28 | 3.08E-20 |
| CAMK2N1 | SMC | 26.40% | 11.30% | 0.26 | 4.78E-20 |
| FKBP4   | SMC | 42.40% | 26.70% | 0.29 | 5.17E-20 |
| TAX1BP1 | SMC | 72.80% | 65.70% | 0.29 | 5.29E-20 |
| STAT3   | SMC | 77.70% | 68.90% | 0.33 | 6.10E-20 |
| HLA-F   | SMC | 45.30% | 24.70% | 0.35 | 6.35E-20 |
| NFE2L2  | SMC | 79.10% | 78.90% | 0.33 | 6.82E-20 |
| EIF4G2  | SMC | 92.80% | 88.30% | 0.29 | 7.25E-20 |
| NR4A3   | SMC | 42.40% | 24.50% | 0.37 | 1.09E-19 |
| ZYX     | SMC | 34.10% | 27.00% | 0.26 | 3.23E-19 |
| EIF4A3  | SMC | 77.70% | 67.80% | 0.38 | 5.37E-19 |
| ECE1    | SMC | 45.60% | 25.30% | 0.32 | 5.60E-19 |
| HIF1A   | SMC | 66.80% | 63.60% | 0.29 | 6.59E-19 |
| RPS18   | SMC | 99.70% | 99.70% | 0.29 | 7.93E-19 |
| SLC7A5  | SMC | 39.30% | 22.70% | 0.32 | 8.81E-19 |

|          |     |        |        |      |          |
|----------|-----|--------|--------|------|----------|
| AKAP12   | SMC | 43.80% | 20.80% | 0.42 | 8.83E-19 |
| RPL36A   | SMC | 95.40% | 94.60% | 0.29 | 9.68E-19 |
| HSPB1    | SMC | 97.70% | 94.40% | 0.39 | 1.31E-18 |
| HNRNPM   | SMC | 78.80% | 69.70% | 0.29 | 1.32E-18 |
| B3GNT2   | SMC | 29.50% | 12.10% | 0.26 | 2.91E-18 |
| RPS3     | SMC | 99.10% | 99.50% | 0.26 | 2.97E-18 |
| PTPN1    | SMC | 41.80% | 34.20% | 0.28 | 3.40E-18 |
| RAB13    | SMC | 72.20% | 63.10% | 0.31 | 5.44E-18 |
| AGT      | SMC | 18.60% | 4.00%  | 0.42 | 1.35E-17 |
| EPHX1    | SMC | 74.80% | 57.20% | 0.35 | 1.58E-17 |
| PRPF38B  | SMC | 67.60% | 56.10% | 0.30 | 1.70E-17 |
| DDX18    | SMC | 60.50% | 51.80% | 0.27 | 1.73E-17 |
| C1orf54  | SMC | 50.70% | 29.30% | 0.32 | 1.79E-17 |
| PPP2CA   | SMC | 58.50% | 46.50% | 0.28 | 2.69E-17 |
| NR4A1    | SMC | 79.10% | 74.40% | 0.39 | 3.85E-17 |
| ATF3     | SMC | 75.60% | 69.00% | 0.43 | 6.88E-17 |
| SON      | SMC | 93.40% | 89.30% | 0.28 | 8.27E-17 |
| SNAI2    | SMC | 45.30% | 25.30% | 0.40 | 9.01E-17 |
| NDUFAF4  | SMC | 39.50% | 26.60% | 0.26 | 9.02E-17 |
| ARHGAP1  | SMC | 39.80% | 23.00% | 0.26 | 9.89E-17 |
| FBXO32   | SMC | 26.60% | 20.40% | 0.25 | 1.02E-16 |
| MT-CO3   | SMC | 99.70% | 99.50% | 0.26 | 1.14E-16 |
| BBX      | SMC | 59.90% | 51.90% | 0.27 | 1.31E-16 |
| PPP2R2A  | SMC | 50.10% | 36.70% | 0.27 | 1.51E-16 |
| MGLL     | SMC | 51.90% | 29.40% | 0.36 | 1.70E-16 |
| CHCHD10  | SMC | 23.20% | 8.90%  | 0.34 | 1.90E-16 |
| HNRNPU   | SMC | 73.60% | 67.40% | 0.27 | 2.72E-16 |
| SERPINH1 | SMC | 73.60% | 59.80% | 0.35 | 3.63E-16 |
| RPL4     | SMC | 98.00% | 97.80% | 0.26 | 3.85E-16 |
| ANKRD10  | SMC | 55.60% | 41.00% | 0.28 | 4.12E-16 |
| TARS     | SMC | 46.10% | 35.50% | 0.25 | 6.09E-16 |
| DSTN     | SMC | 98.30% | 96.50% | 0.39 | 6.19E-16 |
| FAT1     | SMC | 37.50% | 23.40% | 0.25 | 9.23E-16 |
| TOB2     | SMC | 56.70% | 50.00% | 0.26 | 1.06E-15 |
| PRKDCBP  | SMC | 86.20% | 77.60% | 0.34 | 1.08E-15 |
| SRSF3    | SMC | 78.50% | 79.10% | 0.28 | 1.92E-15 |
| DYNLL1   | SMC | 96.00% | 96.20% | 0.25 | 2.74E-15 |
| COL6A1   | SMC | 92.80% | 81.30% | 0.44 | 4.42E-15 |
| ARID4B   | SMC | 67.30% | 61.90% | 0.26 | 1.13E-14 |
| C12orf57 | SMC | 91.40% | 83.10% | 0.28 | 1.29E-14 |
| MAFF     | SMC | 40.40% | 27.20% | 0.30 | 1.55E-14 |

|          |     |        |        |      |          |
|----------|-----|--------|--------|------|----------|
| DDX3X    | SMC | 77.90% | 69.80% | 0.32 | 1.73E-14 |
| NAA15    | SMC | 41.80% | 27.70% | 0.26 | 1.79E-14 |
| POR      | SMC | 45.00% | 27.40% | 0.25 | 4.00E-14 |
| KPNB1    | SMC | 60.50% | 51.50% | 0.25 | 4.25E-14 |
| LAMA4    | SMC | 57.60% | 42.20% | 0.30 | 4.90E-14 |
| RBM25    | SMC | 74.50% | 70.20% | 0.26 | 6.02E-14 |
| DDX5     | SMC | 98.30% | 98.10% | 0.30 | 6.42E-14 |
| TACC1    | SMC | 72.50% | 67.20% | 0.27 | 6.50E-14 |
| LGALS3BP | SMC | 73.90% | 52.10% | 0.31 | 7.54E-14 |
| SET      | SMC | 69.30% | 58.20% | 0.31 | 1.60E-13 |
| CREM     | SMC | 52.10% | 45.40% | 0.40 | 1.96E-13 |
| PDK4     | SMC | 43.60% | 27.20% | 0.51 | 2.04E-13 |
| VASP     | SMC | 51.30% | 33.40% | 0.30 | 2.99E-13 |
| ZFAND5   | SMC | 58.20% | 51.20% | 0.26 | 4.59E-13 |
| 7SK.2    | SMC | 13.80% | 20.70% | 0.36 | 6.83E-13 |
| PRRX1    | SMC | 76.50% | 66.00% | 0.32 | 7.96E-13 |
| MYC      | SMC | 78.50% | 65.10% | 0.48 | 8.71E-13 |
| SFPQ     | SMC | 70.20% | 64.50% | 0.26 | 9.76E-13 |
| SPTBN1   | SMC | 57.60% | 47.50% | 0.27 | 2.11E-12 |
| DDIT4    | SMC | 65.00% | 61.20% | 0.47 | 2.71E-12 |
| KPNA2    | SMC | 63.30% | 52.30% | 0.32 | 7.60E-12 |
| TXNRD1   | SMC | 42.40% | 32.30% | 0.30 | 1.17E-11 |
| EIF4B    | SMC | 73.60% | 65.20% | 0.26 | 1.67E-11 |
| CDKN1A   | SMC | 88.30% | 83.10% | 0.34 | 1.97E-11 |
| MT1G     | SMC | 27.80% | 20.50% | 0.57 | 6.46E-11 |
| ID3      | SMC | 84.00% | 73.90% | 0.44 | 9.81E-11 |
| TUBA1C   | SMC | 72.50% | 67.50% | 0.26 | 1.02E-10 |
| IFITM1   | SMC | 45.60% | 29.60% | 0.28 | 1.04E-10 |
| MT2A     | SMC | 99.40% | 95.10% | 0.31 | 1.06E-10 |
| MCL1     | SMC | 78.50% | 71.40% | 0.27 | 1.23E-10 |
| GEM      | SMC | 85.40% | 75.20% | 0.36 | 3.06E-10 |
| RASD1    | SMC | 55.90% | 37.30% | 0.39 | 3.21E-10 |
| NTRK2    | SMC | 35.00% | 31.40% | 0.30 | 3.96E-10 |
| CLEC11A  | SMC | 31.50% | 19.20% | 0.25 | 6.40E-10 |
| SLC38A2  | SMC | 84.20% | 77.40% | 0.27 | 7.91E-10 |
| IFRD1    | SMC | 68.80% | 59.50% | 0.26 | 1.52E-09 |
| HMG2     | SMC | 79.10% | 73.40% | 0.26 | 1.66E-09 |
| ETS2     | SMC | 49.60% | 31.60% | 0.26 | 2.00E-09 |
| ENAH     | SMC | 53.00% | 40.80% | 0.26 | 9.28E-09 |
| CKB      | SMC | 42.10% | 25.40% | 0.30 | 1.76E-08 |
| TSC22D1  | SMC | 65.30% | 53.30% | 0.40 | 6.62E-08 |

|          |        |         |         |      |           |
|----------|--------|---------|---------|------|-----------|
| SMOC2    | SMC    | 54.70%  | 35.60%  | 0.26 | 7.79E-08  |
| HES1     | SMC    | 45.00%  | 48.90%  | 0.29 | 1.02E-07  |
| FILIP1   | SMC    | 34.10%  | 18.90%  | 0.25 | 1.65E-07  |
| ISG15    | SMC    | 43.00%  | 30.20%  | 0.30 | 2.09E-07  |
| RGS16    | SMC    | 65.90%  | 57.40%  | 0.37 | 2.48E-06  |
| APOE     | SMC    | 28.40%  | 14.10%  | 0.27 | 9.14E-06  |
| C8orf4   | SMC    | 23.50%  | 11.90%  | 0.34 | 2.03E-04  |
| IL6      | SMC    | 41.80%  | 36.00%  | 0.60 | 1.99E-03  |
| CFH      | SMC    | 66.80%  | 64.70%  | 0.32 | 8.51E-02  |
| IGFBP5   | SMC    | 51.00%  | 51.30%  | 0.32 | 9.71E-01  |
| MTRNR2L1 | SMC    | 26.90%  | 20.10%  | 0.39 | 1.00E+00  |
| IL32     | T cell | 90.30%  | 11.40%  | 2.38 | 1.15E-264 |
| CXCR4    | T cell | 97.20%  | 10.60%  | 3.21 | 2.73E-260 |
| CREM     | T cell | 86.10%  | 45.00%  | 2.13 | 1.43E-245 |
| LEPROTL1 | T cell | 76.40%  | 26.50%  | 1.38 | 1.39E-244 |
| CD2      | T cell | 76.40%  | 0.80%   | 1.81 | 4.37E-200 |
| CD52     | T cell | 88.90%  | 4.10%   | 2.44 | 3.14E-198 |
| CD3D     | T cell | 76.40%  | 0.70%   | 1.63 | 1.55E-195 |
| TMEM66   | T cell | 93.80%  | 85.30%  | 1.27 | 2.73E-188 |
| CD3E     | T cell | 70.80%  | 0.30%   | 1.41 | 4.59E-187 |
| PTPRC    | T cell | 90.30%  | 9.80%   | 1.98 | 8.93E-184 |
| SPOCK2   | T cell | 70.80%  | 1.00%   | 1.37 | 4.31E-182 |
| IL7R     | T cell | 81.20%  | 2.30%   | 1.99 | 2.51E-177 |
| PTPRCAP  | T cell | 69.40%  | 0.80%   | 1.41 | 3.73E-167 |
| CCL5     | T cell | 63.90%  | 2.00%   | 2.32 | 1.06E-163 |
| B2M      | T cell | 100.00% | 100.00% | 1.14 | 1.73E-158 |
| RPS29    | T cell | 100.00% | 99.40%  | 1.11 | 9.29E-155 |
| IL2RG    | T cell | 67.40%  | 1.90%   | 1.24 | 4.38E-142 |
| ICAM3    | T cell | 59.70%  | 16.80%  | 0.99 | 4.96E-141 |
| TUBA4A   | T cell | 54.20%  | 17.40%  | 1.12 | 1.05E-139 |
| CD3G     | T cell | 52.10%  | 0.30%   | 1.10 | 1.16E-131 |
| ARHGDI3  | T cell | 94.40%  | 20.60%  | 1.74 | 6.97E-128 |
| CD7      | T cell | 50.00%  | 1.80%   | 1.27 | 9.93E-127 |
| LTB      | T cell | 52.80%  | 1.00%   | 1.64 | 1.60E-126 |
| ACAP1    | T cell | 59.00%  | 6.50%   | 0.99 | 2.39E-126 |
| RPS27    | T cell | 99.30%  | 100.00% | 0.86 | 1.08E-121 |
| SRGN     | T cell | 98.60%  | 43.30%  | 1.84 | 5.31E-116 |
| HLA-B    | T cell | 100.00% | 98.10%  | 1.30 | 2.60E-115 |
| PPP2R5C  | T cell | 67.40%  | 29.90%  | 0.97 | 2.15E-114 |
| SYTL3    | T cell | 54.20%  | 7.20%   | 1.03 | 3.50E-114 |
| GZMA     | T cell | 46.50%  | 0.40%   | 1.39 | 1.21E-111 |

|              |        |         |        |      |           |
|--------------|--------|---------|--------|------|-----------|
| KLRB1        | T cell | 43.10%  | 0.30%  | 1.93 | 3.35E-111 |
| LCK          | T cell | 47.90%  | 0.50%  | 0.85 | 1.41E-107 |
| BTG1         | T cell | 90.30%  | 68.70% | 1.45 | 4.83E-107 |
| SAMSN1       | T cell | 75.00%  | 5.20%  | 1.43 | 3.46E-99  |
| CORO1A       | T cell | 72.90%  | 8.80%  | 1.41 | 1.21E-98  |
| RPS19        | T cell | 100.00% | 99.50% | 0.86 | 1.64E-98  |
| RUNX3        | T cell | 54.20%  | 3.30%  | 1.14 | 7.51E-97  |
| CDC42SE2     | T cell | 63.90%  | 14.10% | 0.91 | 1.68E-92  |
| HLA-A        | T cell | 100.00% | 98.20% | 1.02 | 2.01E-91  |
| RHOH         | T cell | 54.90%  | 2.00%  | 1.12 | 8.85E-91  |
| CTSW         | T cell | 45.10%  | 1.10%  | 1.13 | 6.67E-88  |
| STK4         | T cell | 75.00%  | 16.40% | 1.14 | 1.86E-87  |
| HCST         | T cell | 79.90%  | 10.00% | 1.34 | 3.69E-84  |
| CD48         | T cell | 53.50%  | 2.60%  | 1.11 | 7.81E-84  |
| EZR          | T cell | 84.00%  | 59.70% | 1.07 | 1.10E-83  |
| EML4         | T cell | 56.90%  | 15.90% | 0.84 | 6.37E-82  |
| CYTIP        | T cell | 68.10%  | 6.00%  | 1.32 | 9.64E-82  |
| NKG7         | T cell | 36.10%  | 0.40%  | 1.47 | 2.86E-81  |
| GZMM         | T cell | 32.60%  | 0.30%  | 0.73 | 1.49E-80  |
| STAT4        | T cell | 41.00%  | 0.70%  | 0.68 | 2.83E-80  |
| SLA          | T cell | 55.60%  | 3.60%  | 0.99 | 6.98E-79  |
| RPL28        | T cell | 100.00% | 99.70% | 0.77 | 1.14E-78  |
| PBXIP1       | T cell | 61.80%  | 32.30% | 0.79 | 7.00E-78  |
| RNF19A       | T cell | 52.80%  | 19.70% | 0.82 | 1.79E-77  |
| RPS21        | T cell | 99.30%  | 98.60% | 0.78 | 5.12E-76  |
| RPLP2        | T cell | 100.00% | 99.90% | 0.65 | 7.42E-76  |
| PDCD4        | T cell | 66.70%  | 33.00% | 0.84 | 7.68E-75  |
| HLA-C        | T cell | 99.30%  | 97.40% | 0.93 | 1.12E-73  |
| FAM129A      | T cell | 58.30%  | 27.50% | 0.84 | 5.07E-72  |
| CD6          | T cell | 31.90%  | 0.30%  | 0.69 | 5.58E-72  |
| CD53         | T cell | 68.80%  | 10.10% | 1.20 | 8.33E-72  |
| TRAT1        | T cell | 30.60%  | 0.10%  | 0.67 | 8.49E-72  |
| CST7         | T cell | 50.00%  | 2.20%  | 1.10 | 1.74E-71  |
| FYN          | T cell | 62.50%  | 33.80% | 0.78 | 3.89E-71  |
| GZMK         | T cell | 31.20%  | 0.40%  | 1.16 | 8.13E-70  |
| STK17B       | T cell | 64.60%  | 16.70% | 1.07 | 8.52E-70  |
| RPS15A       | T cell | 99.30%  | 99.60% | 0.67 | 6.31E-69  |
| RP11-347P5.1 | T cell | 43.80%  | 2.90%  | 0.90 | 1.11E-67  |
| SLC38A1      | T cell | 41.00%  | 9.40%  | 0.72 | 2.16E-67  |
| S1PR4        | T cell | 31.20%  | 0.40%  | 0.66 | 2.45E-65  |
| TNFRSF18     | T cell | 31.90%  | 4.60%  | 0.98 | 3.13E-65  |



|            |        |         |        |      |          |
|------------|--------|---------|--------|------|----------|
| BCL11B     | T cell | 28.50%  | 0.20%  | 0.55 | 1.24E-64 |
| CD96       | T cell | 29.20%  | 0.30%  | 0.61 | 1.63E-64 |
| CXCR3      | T cell | 37.50%  | 2.50%  | 0.93 | 8.39E-63 |
| PTPN7      | T cell | 35.40%  | 1.30%  | 0.77 | 1.04E-62 |
| CD247      | T cell | 28.50%  | 0.20%  | 0.56 | 3.73E-62 |
| RPS3       | T cell | 100.00% | 99.40% | 0.70 | 1.17E-61 |
| CD37       | T cell | 68.10%  | 10.00% | 1.10 | 1.57E-61 |
| ANKRD12    | T cell | 84.70%  | 70.50% | 0.78 | 1.38E-60 |
| SC5D       | T cell | 38.90%  | 11.30% | 0.65 | 2.27E-60 |
| ISG20      | T cell | 56.90%  | 18.50% | 0.92 | 4.03E-60 |
| RPLP1      | T cell | 100.00% | 99.80% | 0.64 | 7.98E-60 |
| STK17A     | T cell | 50.70%  | 22.70% | 0.72 | 3.16E-59 |
| RPS27A     | T cell | 100.00% | 99.80% | 0.60 | 5.78E-59 |
| G3BP2      | T cell | 54.90%  | 32.10% | 0.67 | 1.02E-57 |
| CAMK4      | T cell | 25.70%  | 0.20%  | 0.50 | 1.23E-57 |
| HMGB2      | T cell | 62.50%  | 47.00% | 0.81 | 1.80E-56 |
| ITGA4      | T cell | 34.00%  | 2.40%  | 0.67 | 4.03E-56 |
| ICOS       | T cell | 25.00%  | 0.20%  | 0.53 | 6.19E-56 |
| SYAP1      | T cell | 55.60%  | 40.80% | 0.67 | 1.30E-55 |
| TGFB1      | T cell | 65.30%  | 43.30% | 0.71 | 1.40E-55 |
| LAPTM5     | T cell | 84.00%  | 21.50% | 0.84 | 2.49E-55 |
| CNOT6L     | T cell | 36.80%  | 10.40% | 0.68 | 2.68E-55 |
| RPSAP58    | T cell | 77.80%  | 62.40% | 0.65 | 2.96E-55 |
| P2RY8      | T cell | 27.10%  | 0.60%  | 0.61 | 7.05E-55 |
| SYNE2      | T cell | 62.50%  | 16.50% | 1.00 | 7.47E-55 |
| RAC2       | T cell | 47.90%  | 4.50%  | 0.95 | 8.14E-55 |
| PBX4       | T cell | 27.10%  | 1.20%  | 0.53 | 1.01E-54 |
| FNBP1      | T cell | 58.30%  | 22.90% | 0.81 | 1.06E-53 |
| RPL27A     | T cell | 100.00% | 99.60% | 0.57 | 1.53E-53 |
| PDCL3      | T cell | 52.10%  | 24.90% | 0.66 | 6.80E-53 |
| TC2N       | T cell | 25.00%  | 0.50%  | 0.53 | 1.29E-52 |
| GPR65      | T cell | 41.70%  | 2.20%  | 0.81 | 2.20E-52 |
| PRPF38B    | T cell | 73.60%  | 56.30% | 0.69 | 3.13E-52 |
| AIM1       | T cell | 31.90%  | 4.90%  | 0.66 | 1.24E-51 |
| GIMAP7     | T cell | 54.90%  | 5.70%  | 0.88 | 4.81E-51 |
| RPL38      | T cell | 99.30%  | 99.30% | 0.60 | 5.08E-51 |
| RPL23A     | T cell | 100.00% | 99.70% | 0.57 | 6.81E-51 |
| RPS10      | T cell | 98.60%  | 96.00% | 0.68 | 7.50E-51 |
| AC092580.4 | T cell | 22.90%  | 0.20%  | 0.59 | 2.05E-50 |
| NR3C1      | T cell | 62.50%  | 51.80% | 0.64 | 4.71E-50 |
| TNFRSF1B   | T cell | 54.90%  | 9.60%  | 0.93 | 6.83E-50 |

|          |        |         |        |      |          |
|----------|--------|---------|--------|------|----------|
| CD69     | T cell | 45.10%  | 3.30%  | 1.18 | 1.13E-49 |
| GATA3    | T cell | 25.00%  | 0.30%  | 0.50 | 5.95E-49 |
| CD8A     | T cell | 20.10%  | 0.10%  | 0.66 | 6.62E-49 |
| RPS28    | T cell | 100.00% | 99.80% | 0.59 | 7.66E-49 |
| PPP1R2   | T cell | 51.40%  | 39.10% | 0.59 | 1.01E-48 |
| CCR6     | T cell | 22.20%  | 0.40%  | 0.58 | 1.29E-48 |
| RASGRP1  | T cell | 22.20%  | 0.50%  | 0.38 | 2.08E-48 |
| ISCA1    | T cell | 55.60%  | 37.80% | 0.54 | 1.09E-47 |
| RPL30    | T cell | 100.00% | 99.60% | 0.55 | 1.45E-47 |
| YPEL5    | T cell | 78.50%  | 60.10% | 0.67 | 1.82E-47 |
| FYB      | T cell | 52.10%  | 7.30%  | 0.89 | 2.71E-47 |
| PDCD1    | T cell | 20.80%  | 0.10%  | 0.51 | 4.30E-47 |
| CCND3    | T cell | 42.40%  | 23.20% | 0.58 | 7.43E-47 |
| P2RY10   | T cell | 24.30%  | 0.30%  | 0.46 | 8.39E-47 |
| TSC22D3  | T cell | 94.40%  | 83.10% | 0.93 | 9.71E-47 |
| RPL31    | T cell | 100.00% | 99.60% | 0.58 | 1.79E-46 |
| RPL21    | T cell | 100.00% | 99.90% | 0.52 | 4.86E-46 |
| MPZL3    | T cell | 21.50%  | 1.10%  | 0.47 | 6.94E-46 |
| VPS37B   | T cell | 41.00%  | 13.90% | 0.66 | 9.03E-46 |
| APOBEC3G | T cell | 26.40%  | 7.30%  | 0.53 | 1.26E-45 |
| PIK3IP1  | T cell | 45.80%  | 13.80% | 0.68 | 1.49E-45 |
| HN1      | T cell | 52.80%  | 35.40% | 0.57 | 5.64E-45 |
| GPR171   | T cell | 22.20%  | 0.20%  | 0.48 | 2.22E-44 |
| KMT2E    | T cell | 74.30%  | 59.00% | 0.69 | 1.30E-43 |
| GPR183   | T cell | 72.90%  | 19.60% | 1.26 | 3.05E-43 |
| RPL36A   | T cell | 97.20%  | 94.60% | 0.69 | 3.91E-43 |
| RPS15    | T cell | 99.30%  | 99.90% | 0.46 | 4.59E-43 |
| SH2D2A   | T cell | 22.90%  | 1.40%  | 0.41 | 4.65E-43 |
| RPSA     | T cell | 98.60%  | 97.70% | 0.65 | 5.54E-43 |
| RPL36    | T cell | 99.30%  | 99.20% | 0.54 | 9.64E-43 |
| RPS16    | T cell | 100.00% | 99.40% | 0.52 | 9.83E-43 |
| FAM177A1 | T cell | 60.40%  | 59.60% | 0.52 | 2.07E-42 |
| MCL1     | T cell | 70.10%  | 71.70% | 0.74 | 2.14E-42 |
| CLEC2D   | T cell | 25.00%  | 1.30%  | 0.54 | 1.19E-41 |
| RNF125   | T cell | 27.80%  | 2.00%  | 0.59 | 2.28E-41 |
| LAT      | T cell | 31.90%  | 3.10%  | 0.64 | 2.34E-41 |
| CCR7     | T cell | 37.50%  | 2.70%  | 0.89 | 2.86E-41 |
| PTGER4   | T cell | 46.50%  | 22.10% | 0.70 | 3.59E-41 |
| 43349    | T cell | 50.70%  | 26.40% | 0.60 | 5.54E-41 |
| SF1      | T cell | 67.40%  | 52.10% | 0.58 | 7.87E-41 |
| SUB1     | T cell | 90.30%  | 82.20% | 0.60 | 9.79E-41 |

|              |        |         |         |      |          |
|--------------|--------|---------|---------|------|----------|
| ETS1         | T cell | 50.00%  | 19.70%  | 0.69 | 1.19E-40 |
| MBP          | T cell | 54.20%  | 16.50%  | 0.74 | 2.03E-40 |
| RPS25        | T cell | 100.00% | 99.80%  | 0.51 | 2.81E-40 |
| GNG2         | T cell | 37.50%  | 5.70%   | 0.68 | 1.02E-39 |
| ZAP70        | T cell | 16.70%  | 0.10%   | 0.35 | 1.17E-39 |
| PLAC8        | T cell | 22.20%  | 0.30%   | 0.40 | 1.34E-39 |
| BIN2         | T cell | 31.90%  | 3.10%   | 0.63 | 4.76E-39 |
| RP11-640M9.1 | T cell | 31.20%  | 10.90%  | 0.53 | 5.21E-39 |
| C9orf78      | T cell | 58.30%  | 43.80%  | 0.53 | 6.00E-39 |
| PRF1         | T cell | 18.10%  | 0.20%   | 0.49 | 3.25E-38 |
| HOPX         | T cell | 25.00%  | 1.50%   | 0.65 | 3.74E-38 |
| RPL41        | T cell | 100.00% | 100.00% | 0.47 | 4.48E-38 |
| WHSC1L1      | T cell | 50.00%  | 37.20%  | 0.52 | 5.44E-38 |
| WIPF1        | T cell | 44.40%  | 32.30%  | 0.51 | 6.46E-38 |
| ZFP36L2      | T cell | 75.70%  | 57.60%  | 0.81 | 7.16E-38 |
| KIAA1551     | T cell | 42.40%  | 10.00%  | 0.64 | 8.17E-38 |
| SMCHD1       | T cell | 40.30%  | 15.60%  | 0.63 | 9.32E-38 |
| RPS2         | T cell | 100.00% | 99.60%  | 0.56 | 1.52E-37 |
| EVL          | T cell | 36.10%  | 16.70%  | 0.51 | 9.91E-37 |
| SLBP         | T cell | 30.60%  | 15.90%  | 0.49 | 1.00E-36 |
| MECP2        | T cell | 41.70%  | 26.00%  | 0.53 | 1.08E-36 |
| AKNA         | T cell | 31.20%  | 7.60%   | 0.54 | 1.58E-36 |
| ATP1B3       | T cell | 79.20%  | 70.30%  | 0.64 | 2.47E-36 |
| ARL4C        | T cell | 53.50%  | 18.30%  | 0.78 | 3.90E-36 |
| RPL35        | T cell | 100.00% | 99.50%  | 0.46 | 5.34E-36 |
| AQP3         | T cell | 30.60%  | 12.10%  | 0.56 | 6.86E-36 |
| CD27         | T cell | 21.50%  | 0.40%   | 0.46 | 6.87E-36 |
| PRKCQ-AS1    | T cell | 16.70%  | 1.00%   | 0.37 | 7.68E-36 |
| GPSM3        | T cell | 48.60%  | 7.80%   | 0.71 | 8.68E-36 |
| TBC1D10C     | T cell | 20.10%  | 0.40%   | 0.40 | 2.21E-35 |
| HMOX2        | T cell | 44.40%  | 28.80%  | 0.46 | 4.23E-35 |
| LCP1         | T cell | 52.10%  | 8.70%   | 0.74 | 1.23E-34 |
| RPS14        | T cell | 100.00% | 99.60%  | 0.50 | 1.77E-34 |
| SRSF2        | T cell | 88.20%  | 83.80%  | 0.62 | 2.63E-34 |
| RILPL2       | T cell | 43.80%  | 32.10%  | 0.62 | 4.29E-34 |
| AP3M2        | T cell | 24.30%  | 4.00%   | 0.49 | 6.77E-34 |
| CD97         | T cell | 48.60%  | 34.10%  | 0.55 | 7.99E-34 |
| DNAJC9       | T cell | 36.80%  | 14.30%  | 0.49 | 2.02E-33 |
| CD5          | T cell | 19.40%  | 0.30%   | 0.40 | 2.05E-33 |
| RP11-138A9.1 | T cell | 41.00%  | 26.80%  | 0.55 | 2.67E-33 |
| SIT1         | T cell | 17.40%  | 0.20%   | 0.40 | 3.44E-33 |

|             |        |         |        |      |          |
|-------------|--------|---------|--------|------|----------|
| SRSF7       | T cell | 73.60%  | 65.60% | 0.60 | 4.18E-33 |
| H2AFV       | T cell | 61.10%  | 50.80% | 0.49 | 5.97E-33 |
| CASP8       | T cell | 22.90%  | 4.40%  | 0.47 | 9.56E-33 |
| SH2D1A      | T cell | 20.10%  | 0.60%  | 0.44 | 1.16E-32 |
| YWHAZ       | T cell | 79.90%  | 74.20% | 0.54 | 1.37E-32 |
| ARF6        | T cell | 52.80%  | 27.80% | 0.63 | 1.62E-32 |
| ITGB7       | T cell | 22.20%  | 1.20%  | 0.41 | 1.96E-32 |
| RPL14       | T cell | 100.00% | 99.50% | 0.46 | 2.27E-32 |
| CXCR6       | T cell | 16.70%  | 0.10%  | 0.36 | 3.16E-32 |
| RPS7        | T cell | 98.60%  | 99.00% | 0.47 | 9.12E-32 |
| ZBTB1       | T cell | 36.10%  | 19.00% | 0.53 | 2.84E-31 |
| RPS12       | T cell | 99.30%  | 99.80% | 0.50 | 9.74E-31 |
| PABPC1      | T cell | 96.50%  | 92.90% | 0.67 | 1.44E-30 |
| RPL17       | T cell | 84.70%  | 80.20% | 0.53 | 2.43E-30 |
| PDE4A       | T cell | 34.00%  | 13.50% | 0.51 | 3.10E-30 |
| ITGB2       | T cell | 52.80%  | 10.70% | 0.82 | 3.39E-30 |
| ARHGAP15    | T cell | 29.20%  | 3.20%  | 0.58 | 4.13E-30 |
| SMAP2       | T cell | 46.50%  | 11.50% | 0.66 | 4.77E-30 |
| CDKN1B      | T cell | 36.80%  | 20.60% | 0.47 | 6.10E-30 |
| RCAN3       | T cell | 25.70%  | 4.80%  | 0.43 | 7.38E-30 |
| APOBEC3H    | T cell | 13.90%  | 0.10%  | 0.27 | 8.33E-30 |
| SPN         | T cell | 18.10%  | 0.80%  | 0.39 | 8.42E-30 |
| LIMD2       | T cell | 24.30%  | 2.80%  | 0.52 | 9.61E-30 |
| BIRC3       | T cell | 68.80%  | 22.80% | 0.91 | 1.09E-29 |
| GNLY        | T cell | 12.50%  | 0.50%  | 1.85 | 1.13E-29 |
| GZMH        | T cell | 13.90%  | 0.20%  | 0.65 | 1.43E-29 |
| GZMB        | T cell | 16.70%  | 0.30%  | 0.99 | 1.50E-29 |
| RP11-51J9.5 | T cell | 25.00%  | 6.10%  | 0.48 | 2.01E-29 |
| RORA        | T cell | 54.20%  | 44.80% | 0.53 | 2.30E-29 |
| MAL         | T cell | 18.10%  | 0.60%  | 0.33 | 3.74E-29 |
| TIGIT       | T cell | 14.60%  | 0.20%  | 0.52 | 1.58E-28 |
| TRABD       | T cell | 30.60%  | 18.80% | 0.40 | 1.78E-28 |
| PIK3R1      | T cell | 47.20%  | 33.20% | 0.56 | 2.36E-28 |
| USP15       | T cell | 37.50%  | 28.30% | 0.43 | 3.52E-28 |
| ITK         | T cell | 15.30%  | 0.30%  | 0.33 | 3.53E-28 |
| RPL13       | T cell | 100.00% | 99.90% | 0.47 | 4.37E-28 |
| SAMD3       | T cell | 15.30%  | 0.20%  | 0.37 | 4.73E-28 |
| EVI2B       | T cell | 46.50%  | 8.20%  | 0.66 | 4.75E-28 |
| RPL34       | T cell | 99.30%  | 99.90% | 0.47 | 5.34E-28 |
| DUSP4       | T cell | 43.80%  | 16.50% | 0.88 | 5.52E-28 |
| AKIRIN1     | T cell | 41.70%  | 25.90% | 0.46 | 6.06E-28 |

|              |        |         |        |      |          |
|--------------|--------|---------|--------|------|----------|
| PAIP2        | T cell | 63.90%  | 58.10% | 0.44 | 8.42E-28 |
| EMB          | T cell | 47.90%  | 8.80%  | 0.65 | 9.78E-28 |
| CHD2         | T cell | 51.40%  | 32.60% | 0.56 | 1.60E-27 |
| CD8B         | T cell | 13.90%  | 2.40%  | 0.39 | 2.19E-27 |
| AAK1         | T cell | 41.00%  | 25.20% | 0.47 | 3.20E-27 |
| IKZF1        | T cell | 26.40%  | 2.20%  | 0.47 | 3.54E-27 |
| NARF         | T cell | 41.70%  | 31.20% | 0.40 | 4.15E-27 |
| RPL18A       | T cell | 100.00% | 99.70% | 0.44 | 4.86E-27 |
| OCIAD2       | T cell | 39.60%  | 10.60% | 0.48 | 5.36E-27 |
| IL10RA       | T cell | 36.80%  | 6.00%  | 0.67 | 1.05E-26 |
| PDE3B        | T cell | 20.80%  | 2.60%  | 0.40 | 1.24E-26 |
| MIR142       | T cell | 28.50%  | 2.80%  | 0.56 | 1.43E-26 |
| BATF         | T cell | 27.10%  | 2.50%  | 0.63 | 1.98E-26 |
| RPL37        | T cell | 100.00% | 99.70% | 0.45 | 2.64E-26 |
| TBCC         | T cell | 31.20%  | 16.70% | 0.40 | 3.24E-26 |
| SKAP1        | T cell | 18.10%  | 0.60%  | 0.35 | 4.73E-26 |
| RPS20        | T cell | 99.30%  | 99.80% | 0.40 | 7.21E-26 |
| RALGAPA1     | T cell | 25.70%  | 16.30% | 0.40 | 7.65E-26 |
| NKTR         | T cell | 44.40%  | 30.20% | 0.52 | 1.11E-25 |
| WDR74        | T cell | 37.50%  | 25.10% | 0.43 | 1.23E-25 |
| CCNH         | T cell | 26.40%  | 22.10% | 0.36 | 1.32E-25 |
| RASSF5       | T cell | 31.20%  | 5.90%  | 0.55 | 1.84E-25 |
| RPL32        | T cell | 99.30%  | 99.80% | 0.43 | 1.97E-25 |
| JOSD1        | T cell | 32.60%  | 12.30% | 0.45 | 2.18E-25 |
| VPS4B        | T cell | 41.00%  | 32.80% | 0.40 | 2.25E-25 |
| FBXO34       | T cell | 27.10%  | 9.80%  | 0.46 | 2.48E-25 |
| IL2RB        | T cell | 12.50%  | 0.20%  | 0.31 | 2.68E-25 |
| ALOX5AP      | T cell | 56.20%  | 14.10% | 0.80 | 2.72E-25 |
| CYTH1        | T cell | 41.00%  | 18.50% | 0.54 | 2.82E-25 |
| XCL1         | T cell | 11.80%  | 0.10%  | 0.40 | 3.51E-25 |
| ARAP2        | T cell | 20.10%  | 3.50%  | 0.39 | 3.70E-25 |
| TNFAIP3      | T cell | 71.50%  | 29.10% | 0.80 | 4.24E-25 |
| RP11-94L15.2 | T cell | 16.00%  | 0.40%  | 0.42 | 4.63E-25 |
| CAPZA1       | T cell | 50.00%  | 38.20% | 0.46 | 5.36E-25 |
| RGS1         | T cell | 56.20%  | 16.40% | 0.66 | 1.11E-24 |
| FAM65B       | T cell | 18.10%  | 0.90%  | 0.41 | 1.24E-24 |
| SCAF11       | T cell | 59.70%  | 57.00% | 0.43 | 1.49E-24 |
| SKIL         | T cell | 56.90%  | 52.90% | 0.50 | 1.61E-24 |
| NOSIP        | T cell | 46.50%  | 42.40% | 0.33 | 1.96E-24 |
| ORAI2        | T cell | 25.00%  | 20.60% | 0.31 | 2.05E-24 |
| RPL39        | T cell | 99.30%  | 99.30% | 0.47 | 2.30E-24 |

|          |        |         |         |      |          |
|----------|--------|---------|---------|------|----------|
| ARID5A   | T cell | 63.20%  | 43.00%  | 0.57 | 2.69E-24 |
| RPL26    | T cell | 99.30%  | 99.80%  | 0.41 | 2.94E-24 |
| FAU      | T cell | 99.30%  | 99.50%  | 0.37 | 2.96E-24 |
| ZC3HAV1  | T cell | 48.60%  | 42.20%  | 0.45 | 3.36E-24 |
| GSTK1    | T cell | 65.30%  | 59.20%  | 0.44 | 3.68E-24 |
| SAFB2    | T cell | 50.70%  | 42.30%  | 0.42 | 4.12E-24 |
| DDIT4    | T cell | 82.60%  | 61.00%  | 0.80 | 8.93E-24 |
| FAM102A  | T cell | 20.10%  | 6.30%   | 0.32 | 2.27E-23 |
| PARP8    | T cell | 21.50%  | 4.60%   | 0.40 | 3.62E-23 |
| RHOF     | T cell | 34.70%  | 6.30%   | 0.56 | 5.14E-23 |
| PCSK1N   | T cell | 11.80%  | 0.20%   | 0.33 | 7.06E-23 |
| PPP1R16B | T cell | 15.30%  | 0.50%   | 0.26 | 1.02E-22 |
| LDHB     | T cell | 66.00%  | 57.70%  | 0.46 | 1.09E-22 |
| RPL18    | T cell | 100.00% | 99.20%  | 0.43 | 1.27E-22 |
| RBM38    | T cell | 20.10%  | 1.90%   | 0.31 | 1.27E-22 |
| RPL27    | T cell | 98.60%  | 99.20%  | 0.40 | 1.52E-22 |
| DOCK8    | T cell | 26.40%  | 6.10%   | 0.45 | 1.78E-22 |
| RPL11    | T cell | 100.00% | 99.90%  | 0.39 | 1.99E-22 |
| ARHGAP9  | T cell | 22.20%  | 3.00%   | 0.40 | 4.41E-22 |
| ITM2A    | T cell | 59.00%  | 23.10%  | 0.85 | 5.73E-22 |
| C9orf142 | T cell | 35.40%  | 29.00%  | 0.34 | 6.45E-22 |
| RNF168   | T cell | 27.80%  | 17.30%  | 0.38 | 7.06E-22 |
| CCDC107  | T cell | 52.80%  | 47.90%  | 0.37 | 7.75E-22 |
| PGAP1    | T cell | 15.30%  | 4.80%   | 0.34 | 7.80E-22 |
| FGFR1OP2 | T cell | 47.90%  | 42.80%  | 0.36 | 8.68E-22 |
| RPL13A   | T cell | 100.00% | 99.90%  | 0.39 | 9.57E-22 |
| IDS      | T cell | 56.90%  | 54.30%  | 0.37 | 9.81E-22 |
| GPATCH8  | T cell | 34.70%  | 31.20%  | 0.33 | 1.17E-21 |
| TNFSF14  | T cell | 20.10%  | 1.10%   | 0.42 | 1.21E-21 |
| TERF2IP  | T cell | 61.10%  | 54.20%  | 0.42 | 2.16E-21 |
| GLTSCR2  | T cell | 92.40%  | 84.30%  | 0.53 | 2.16E-21 |
| RPL19    | T cell | 100.00% | 99.80%  | 0.39 | 2.86E-21 |
| RPS6     | T cell | 100.00% | 99.80%  | 0.41 | 3.67E-21 |
| TRAF3IP3 | T cell | 16.70%  | 0.60%   | 0.32 | 6.40E-21 |
| TMSB4X   | T cell | 100.00% | 100.00% | 0.33 | 7.08E-21 |
| SESN3    | T cell | 22.20%  | 14.50%  | 0.36 | 9.19E-21 |
| HLA-F    | T cell | 49.30%  | 25.00%  | 0.55 | 1.15E-20 |
| HLA-E    | T cell | 95.80%  | 91.20%  | 0.53 | 1.33E-20 |
| ARHGEF1  | T cell | 32.60%  | 20.40%  | 0.38 | 1.42E-20 |
| TOB1     | T cell | 52.10%  | 52.80%  | 0.42 | 1.51E-20 |
| ANP32E   | T cell | 39.60%  | 39.50%  | 0.33 | 1.66E-20 |

|              |        |         |         |      |          |
|--------------|--------|---------|---------|------|----------|
| PTP4A1       | T cell | 36.80%  | 32.40%  | 0.34 | 2.58E-20 |
| RPL9         | T cell | 100.00% | 99.40%  | 0.40 | 2.89E-20 |
| IQGAP2       | T cell | 33.30%  | 5.00%   | 0.52 | 3.16E-20 |
| BUB3         | T cell | 43.80%  | 40.80%  | 0.30 | 4.72E-20 |
| GMFG         | T cell | 54.90%  | 15.90%  | 0.62 | 4.80E-20 |
| FLT3LG       | T cell | 20.80%  | 7.80%   | 0.32 | 6.93E-20 |
| CSNK1D       | T cell | 47.20%  | 35.90%  | 0.41 | 8.81E-20 |
| RP1-313I6.12 | T cell | 20.80%  | 5.30%   | 0.47 | 9.06E-20 |
| SYTL1        | T cell | 13.20%  | 0.40%   | 0.26 | 1.30E-19 |
| AC016831.7   | T cell | 27.80%  | 11.70%  | 0.41 | 1.81E-19 |
| HERPUD2      | T cell | 25.70%  | 21.10%  | 0.31 | 1.84E-19 |
| CDK6         | T cell | 18.10%  | 10.20%  | 0.33 | 2.04E-19 |
| UBA52        | T cell | 97.90%  | 99.30%  | 0.33 | 2.30E-19 |
| DUSP10       | T cell | 37.50%  | 27.30%  | 0.46 | 2.35E-19 |
| OASL         | T cell | 20.10%  | 1.90%   | 0.38 | 3.14E-19 |
| PIP4K2A      | T cell | 22.20%  | 16.50%  | 0.32 | 4.23E-19 |
| TSPYL2       | T cell | 43.10%  | 26.80%  | 0.47 | 5.71E-19 |
| MYL12A       | T cell | 90.30%  | 91.00%  | 0.46 | 6.54E-19 |
| GPBP1        | T cell | 63.90%  | 57.40%  | 0.42 | 7.20E-19 |
| HIST1H4C     | T cell | 52.10%  | 43.20%  | 0.71 | 8.81E-19 |
| LRRFIP1      | T cell | 81.90%  | 64.30%  | 0.57 | 1.05E-18 |
| SS18L2       | T cell | 41.00%  | 29.60%  | 0.36 | 1.15E-18 |
| GIMAP4       | T cell | 31.20%  | 5.30%   | 0.58 | 1.21E-18 |
| PDE4D        | T cell | 39.60%  | 20.50%  | 0.45 | 1.45E-18 |
| MED17        | T cell | 20.10%  | 13.10%  | 0.28 | 2.32E-18 |
| RPL3         | T cell | 100.00% | 99.70%  | 0.41 | 2.47E-18 |
| PCSK7        | T cell | 32.60%  | 23.20%  | 0.39 | 2.64E-18 |
| ZNF331       | T cell | 50.70%  | 24.30%  | 0.68 | 2.78E-18 |
| PCNX         | T cell | 20.10%  | 11.70%  | 0.28 | 5.62E-18 |
| USP36        | T cell | 30.60%  | 14.60%  | 0.37 | 6.06E-18 |
| HMHA1        | T cell | 27.10%  | 4.40%   | 0.47 | 6.35E-18 |
| PRKCB        | T cell | 16.70%  | 1.20%   | 0.33 | 6.63E-18 |
| SLC2A3       | T cell | 61.10%  | 34.60%  | 0.59 | 8.55E-18 |
| RPS18        | T cell | 100.00% | 99.70%  | 0.44 | 1.04E-17 |
| PPM1G        | T cell | 48.60%  | 39.30%  | 0.35 | 1.17E-17 |
| STMN1        | T cell | 34.00%  | 16.50%  | 0.75 | 1.28E-17 |
| MYO1G        | T cell | 27.80%  | 4.50%   | 0.48 | 1.31E-17 |
| TESPA1       | T cell | 14.60%  | 0.50%   | 0.33 | 1.43E-17 |
| KIF21A       | T cell | 23.60%  | 13.00%  | 0.30 | 1.59E-17 |
| MALAT1       | T cell | 100.00% | 100.00% | 0.34 | 1.79E-17 |
| CEBPZ        | T cell | 42.40%  | 39.20%  | 0.33 | 2.34E-17 |

|          |        |         |        |      |          |
|----------|--------|---------|--------|------|----------|
| ANXA1    | T cell | 95.10%  | 98.50% | 0.55 | 2.51E-17 |
| TMC6     | T cell | 18.80%  | 2.10%  | 0.35 | 2.85E-17 |
| GCC2     | T cell | 48.60%  | 35.60% | 0.41 | 3.21E-17 |
| FMNL1    | T cell | 34.70%  | 9.80%  | 0.44 | 3.27E-17 |
| TMEM123  | T cell | 57.60%  | 43.80% | 0.45 | 3.94E-17 |
| PMF1     | T cell | 41.70%  | 36.70% | 0.29 | 4.25E-17 |
| TMEM2    | T cell | 34.70%  | 23.30% | 0.43 | 4.70E-17 |
| NCOR1    | T cell | 54.90%  | 52.20% | 0.33 | 4.83E-17 |
| PDE4B    | T cell | 43.10%  | 21.60% | 0.57 | 5.82E-17 |
| RPL6     | T cell | 100.00% | 99.60% | 0.36 | 6.98E-17 |
| DDX24    | T cell | 74.30%  | 68.60% | 0.40 | 7.58E-17 |
| CD28     | T cell | 11.80%  | 0.30%  | 0.27 | 8.26E-17 |
| FNBP4    | T cell | 45.80%  | 34.50% | 0.39 | 9.31E-17 |
| TSTD1    | T cell | 28.50%  | 5.90%  | 0.40 | 1.01E-16 |
| RABIF    | T cell | 25.00%  | 17.20% | 0.27 | 1.04E-16 |
| IDI1     | T cell | 48.60%  | 45.20% | 0.39 | 1.06E-16 |
| TNFRSF4  | T cell | 16.70%  | 1.60%  | 0.44 | 1.23E-16 |
| DDX27    | T cell | 36.10%  | 28.40% | 0.33 | 1.48E-16 |
| HBS1L    | T cell | 27.80%  | 19.60% | 0.30 | 1.63E-16 |
| BCAS2    | T cell | 39.60%  | 36.80% | 0.29 | 1.66E-16 |
| PPP2CA   | T cell | 47.20%  | 46.80% | 0.30 | 1.73E-16 |
| ELF1     | T cell | 57.60%  | 52.00% | 0.41 | 1.86E-16 |
| FXVD7    | T cell | 11.10%  | 0.60%  | 0.30 | 3.43E-16 |
| TAGAP    | T cell | 25.00%  | 3.60%  | 0.48 | 3.57E-16 |
| TAP1     | T cell | 34.70%  | 25.40% | 0.38 | 3.65E-16 |
| METTL9   | T cell | 52.10%  | 48.70% | 0.34 | 3.74E-16 |
| ODF2L    | T cell | 39.60%  | 23.00% | 0.39 | 3.94E-16 |
| C19orf43 | T cell | 78.50%  | 76.50% | 0.37 | 4.53E-16 |
| DNAJB6   | T cell | 77.10%  | 71.00% | 0.42 | 4.75E-16 |
| RPS3A    | T cell | 100.00% | 99.60% | 0.39 | 4.80E-16 |
| CCM2     | T cell | 25.70%  | 19.70% | 0.26 | 5.21E-16 |
| BAZ1A    | T cell | 60.40%  | 57.00% | 0.43 | 5.79E-16 |
| BDP1     | T cell | 47.90%  | 38.00% | 0.37 | 7.56E-16 |
| AES      | T cell | 45.10%  | 35.40% | 0.37 | 9.60E-16 |
| TSC22D4  | T cell | 28.50%  | 23.10% | 0.26 | 1.08E-15 |
| SLAMF1   | T cell | 13.20%  | 0.50%  | 0.31 | 1.10E-15 |
| PHF1     | T cell | 34.70%  | 32.90% | 0.28 | 1.26E-15 |
| ZC3H12D  | T cell | 10.40%  | 0.30%  | 0.25 | 1.33E-15 |
| FAM46C   | T cell | 31.20%  | 11.90% | 0.40 | 1.38E-15 |
| RNF213   | T cell | 37.50%  | 31.50% | 0.36 | 1.48E-15 |
| GYPC     | T cell | 59.70%  | 58.80% | 0.37 | 1.71E-15 |



|              |        |         |        |      |          |
|--------------|--------|---------|--------|------|----------|
| FAS          | T cell | 26.40%  | 15.40% | 0.31 | 1.71E-15 |
| SELL         | T cell | 10.40%  | 2.60%  | 0.34 | 2.74E-15 |
| RNF149       | T cell | 43.10%  | 29.80% | 0.40 | 2.79E-15 |
| TNFRSF25     | T cell | 13.90%  | 1.20%  | 0.32 | 3.92E-15 |
| CDK17        | T cell | 20.10%  | 11.40% | 0.29 | 4.45E-15 |
| VAMP8        | T cell | 48.60%  | 18.90% | 0.31 | 4.63E-15 |
| MTERFD2      | T cell | 24.30%  | 9.30%  | 0.33 | 4.77E-15 |
| PERP         | T cell | 39.60%  | 21.70% | 0.45 | 5.97E-15 |
| MGAT4A       | T cell | 27.80%  | 5.60%  | 0.44 | 6.78E-15 |
| MRPL1        | T cell | 29.90%  | 18.60% | 0.35 | 7.00E-15 |
| RPL10        | T cell | 100.00% | 99.90% | 0.33 | 7.27E-15 |
| LPXN         | T cell | 34.00%  | 9.30%  | 0.49 | 7.32E-15 |
| RBM39        | T cell | 80.60%  | 85.50% | 0.35 | 7.39E-15 |
| POLE3        | T cell | 37.50%  | 34.10% | 0.28 | 8.24E-15 |
| TPM3         | T cell | 80.60%  | 72.50% | 0.46 | 1.03E-14 |
| SEP1         | T cell | 32.60%  | 20.00% | 0.32 | 1.09E-14 |
| RP11-345J4.5 | T cell | 44.40%  | 39.00% | 0.31 | 1.14E-14 |
| AMICA1       | T cell | 22.90%  | 2.60%  | 0.41 | 1.32E-14 |
| KLF3         | T cell | 36.10%  | 24.60% | 0.39 | 1.39E-14 |
| PITPNC1      | T cell | 16.70%  | 2.60%  | 0.31 | 1.56E-14 |
| RPL29        | T cell | 100.00% | 99.30% | 0.33 | 1.59E-14 |
| RPL35A       | T cell | 100.00% | 99.60% | 0.35 | 1.62E-14 |
| BCL2         | T cell | 16.00%  | 2.80%  | 0.31 | 1.88E-14 |
| JAK1         | T cell | 61.80%  | 51.20% | 0.39 | 2.72E-14 |
| MAP2K1       | T cell | 33.30%  | 18.10% | 0.40 | 3.06E-14 |
| MATK         | T cell | 16.00%  | 1.50%  | 0.37 | 3.82E-14 |
| SEMA4D       | T cell | 13.90%  | 1.50%  | 0.27 | 4.03E-14 |
| EEF1D        | T cell | 99.30%  | 97.70% | 0.37 | 5.52E-14 |
| PPP1CA       | T cell | 55.60%  | 57.10% | 0.26 | 5.69E-14 |
| OFD1         | T cell | 27.80%  | 19.10% | 0.32 | 6.58E-14 |
| CCDC12       | T cell | 49.30%  | 40.30% | 0.32 | 7.79E-14 |
| GLUD1        | T cell | 32.60%  | 35.00% | 0.29 | 1.03E-13 |
| FKBP5        | T cell | 42.40%  | 27.40% | 0.41 | 1.03E-13 |
| CNN2         | T cell | 26.40%  | 13.30% | 0.35 | 1.30E-13 |
| DNAJC1       | T cell | 27.80%  | 21.00% | 0.32 | 1.49E-13 |
| GPR132       | T cell | 20.10%  | 3.00%  | 0.40 | 1.53E-13 |
| MAPK1IP1L    | T cell | 43.10%  | 36.50% | 0.29 | 1.94E-13 |
| CYBA         | T cell | 90.30%  | 77.80% | 0.49 | 2.03E-13 |
| EPC1         | T cell | 44.40%  | 43.30% | 0.28 | 2.03E-13 |
| HINT1        | T cell | 88.20%  | 90.80% | 0.33 | 2.24E-13 |
| ZCCHC11      | T cell | 27.10%  | 23.10% | 0.27 | 2.84E-13 |

|              |        |        |        |      |          |
|--------------|--------|--------|--------|------|----------|
| ARID4B       | T cell | 59.00% | 62.10% | 0.31 | 2.86E-13 |
| RP11-138A9.2 | T cell | 27.80% | 17.00% | 0.42 | 3.45E-13 |
| DHX36        | T cell | 47.20% | 48.40% | 0.27 | 3.46E-13 |
| ATP5L        | T cell | 91.00% | 93.80% | 0.31 | 3.57E-13 |
| EIF3J        | T cell | 54.90% | 55.10% | 0.31 | 4.61E-13 |
| GTF3A        | T cell | 58.30% | 59.20% | 0.27 | 6.13E-13 |
| PPM1K        | T cell | 19.40% | 15.90% | 0.25 | 8.81E-13 |
| ARPP19       | T cell | 43.10% | 36.20% | 0.29 | 1.06E-12 |
| RNF166       | T cell | 23.60% | 5.80%  | 0.35 | 1.10E-12 |
| SELK         | T cell | 77.80% | 82.50% | 0.32 | 1.38E-12 |
| PIM2         | T cell | 23.60% | 6.40%  | 0.38 | 1.39E-12 |
| FXYS5        | T cell | 85.40% | 82.40% | 0.45 | 1.80E-12 |
| CBLB         | T cell | 27.10% | 20.80% | 0.29 | 1.90E-12 |
| FBL          | T cell | 51.40% | 53.30% | 0.26 | 2.05E-12 |
| C12orf75     | T cell | 32.60% | 16.90% | 0.44 | 2.37E-12 |
| CORO7        | T cell | 20.80% | 6.00%  | 0.33 | 2.42E-12 |
| KRAS         | T cell | 35.40% | 32.60% | 0.27 | 3.28E-12 |
| CREBRF       | T cell | 38.90% | 39.80% | 0.28 | 3.65E-12 |
| GIMAP5       | T cell | 26.40% | 4.60%  | 0.38 | 3.76E-12 |
| ABCF1        | T cell | 47.20% | 43.30% | 0.29 | 4.11E-12 |
| WAPAL        | T cell | 38.90% | 31.20% | 0.30 | 4.33E-12 |
| FAM126B      | T cell | 20.80% | 9.90%  | 0.28 | 4.38E-12 |
| TCF7         | T cell | 29.20% | 12.50% | 0.34 | 4.84E-12 |
| CLEC2B       | T cell | 45.80% | 16.40% | 0.54 | 6.02E-12 |
| HMG1         | T cell | 59.70% | 60.90% | 0.29 | 6.07E-12 |
| RASGRP2      | T cell | 19.40% | 3.80%  | 0.30 | 7.41E-12 |
| STAG2        | T cell | 40.30% | 38.20% | 0.27 | 7.71E-12 |
| SRRM1        | T cell | 61.10% | 67.00% | 0.25 | 8.39E-12 |
| EPB41        | T cell | 16.00% | 3.90%  | 0.26 | 1.04E-11 |
| SLFN5        | T cell | 24.30% | 11.50% | 0.33 | 1.16E-11 |
| ABRA1        | T cell | 47.20% | 35.60% | 0.36 | 1.17E-11 |
| UBE2D2       | T cell | 61.80% | 64.10% | 0.25 | 1.49E-11 |
| RAB9A        | T cell | 27.80% | 23.80% | 0.28 | 1.56E-11 |
| ZC3H18       | T cell | 29.20% | 16.00% | 0.31 | 1.66E-11 |
| LINC-PINT    | T cell | 28.50% | 23.80% | 0.26 | 2.09E-11 |
| PIM1         | T cell | 38.90% | 27.10% | 0.38 | 2.17E-11 |
| SF3B1        | T cell | 59.00% | 54.20% | 0.32 | 2.53E-11 |
| ARHGAP30     | T cell | 23.60% | 5.40%  | 0.44 | 2.60E-11 |
| SELT         | T cell | 63.90% | 64.50% | 0.26 | 3.07E-11 |
| RBM4         | T cell | 22.20% | 11.40% | 0.27 | 5.71E-11 |
| CYLD         | T cell | 38.90% | 32.50% | 0.30 | 5.73E-11 |

|          |        |         |        |      |          |
|----------|--------|---------|--------|------|----------|
| RPL4     | T cell | 98.60%  | 97.80% | 0.35 | 6.16E-11 |
| RPS4X    | T cell | 100.00% | 99.80% | 0.34 | 6.20E-11 |
| CEP350   | T cell | 31.20%  | 25.10% | 0.28 | 6.48E-11 |
| SPSB3    | T cell | 36.80%  | 31.60% | 0.26 | 7.44E-11 |
| RHOG     | T cell | 46.50%  | 42.70% | 0.34 | 8.34E-11 |
| DDX39B   | T cell | 17.40%  | 10.50% | 0.26 | 1.14E-10 |
| MSN      | T cell | 67.40%  | 69.90% | 0.29 | 1.17E-10 |
| MFNG     | T cell | 20.80%  | 3.40%  | 0.31 | 1.54E-10 |
| RPL10A   | T cell | 97.90%  | 99.40% | 0.28 | 2.16E-10 |
| ANP32B   | T cell | 59.70%  | 61.50% | 0.27 | 2.25E-10 |
| YWHAB    | T cell | 75.70%  | 82.60% | 0.25 | 2.57E-10 |
| PRKCH    | T cell | 23.60%  | 5.60%  | 0.35 | 2.88E-10 |
| CDK11A   | T cell | 33.30%  | 22.20% | 0.32 | 3.58E-10 |
| PSME1    | T cell | 81.20%  | 78.80% | 0.34 | 4.25E-10 |
| CCND2    | T cell | 45.80%  | 42.70% | 0.27 | 4.30E-10 |
| PNISR    | T cell | 62.50%  | 61.00% | 0.32 | 5.05E-10 |
| PPP1CB   | T cell | 63.20%  | 58.50% | 0.33 | 5.35E-10 |
| RARRES3  | T cell | 38.20%  | 25.90% | 0.37 | 5.42E-10 |
| TES      | T cell | 34.70%  | 33.20% | 0.26 | 5.90E-10 |
| UBA6     | T cell | 29.20%  | 13.90% | 0.30 | 6.03E-10 |
| HCLS1    | T cell | 31.90%  | 9.90%  | 0.44 | 6.11E-10 |
| JUND     | T cell | 63.90%  | 59.60% | 0.36 | 6.15E-10 |
| C20orf24 | T cell | 36.10%  | 31.20% | 0.25 | 6.40E-10 |
| PRRC2C   | T cell | 71.50%  | 73.30% | 0.28 | 7.02E-10 |
| HOXB2    | T cell | 12.50%  | 2.10%  | 0.29 | 7.48E-10 |
| SETD2    | T cell | 29.20%  | 20.00% | 0.28 | 9.04E-10 |
| ITSN2    | T cell | 34.70%  | 34.00% | 0.26 | 9.08E-10 |
| PDE7A    | T cell | 19.40%  | 8.30%  | 0.25 | 9.15E-10 |
| IL27RA   | T cell | 16.70%  | 4.80%  | 0.27 | 1.06E-09 |
| KMT2A    | T cell | 33.30%  | 27.60% | 0.26 | 1.25E-09 |
| ABT1     | T cell | 32.60%  | 19.90% | 0.28 | 1.49E-09 |
| HECA     | T cell | 30.60%  | 19.60% | 0.28 | 1.60E-09 |
| CELF1    | T cell | 30.60%  | 25.60% | 0.28 | 1.81E-09 |
| AKAP13   | T cell | 60.40%  | 61.90% | 0.31 | 1.83E-09 |
| SNRNP200 | T cell | 28.50%  | 20.10% | 0.28 | 1.92E-09 |
| PRMT2    | T cell | 45.80%  | 42.30% | 0.28 | 2.61E-09 |
| PRMT10   | T cell | 19.40%  | 6.50%  | 0.35 | 4.10E-09 |
| MYO1F    | T cell | 17.40%  | 3.60%  | 0.31 | 4.74E-09 |
| TIPARP   | T cell | 59.00%  | 51.10% | 0.45 | 4.85E-09 |
| ZFP36    | T cell | 95.80%  | 92.40% | 0.41 | 4.96E-09 |
| BRD9     | T cell | 20.10%  | 10.70% | 0.28 | 6.44E-09 |

|              |        |         |         |      |          |
|--------------|--------|---------|---------|------|----------|
| ANKRD11      | T cell | 49.30%  | 43.30%  | 0.30 | 9.21E-09 |
| PRKX         | T cell | 13.90%  | 3.10%   | 0.31 | 9.58E-09 |
| NBEAL1       | T cell | 79.90%  | 79.30%  | 0.30 | 1.59E-08 |
| ATXN7        | T cell | 27.10%  | 17.30%  | 0.26 | 1.61E-08 |
| CDC42        | T cell | 77.80%  | 78.00%  | 0.34 | 1.65E-08 |
| RPL36AL      | T cell | 95.10%  | 96.70%  | 0.29 | 1.76E-08 |
| RPS8         | T cell | 98.60%  | 99.70%  | 0.30 | 1.94E-08 |
| RPL37A       | T cell | 100.00% | 99.90%  | 0.25 | 2.17E-08 |
| CNTRL        | T cell | 13.20%  | 7.70%   | 0.25 | 2.49E-08 |
| SNRK         | T cell | 20.10%  | 9.80%   | 0.25 | 4.03E-08 |
| FAM107B      | T cell | 35.40%  | 30.70%  | 0.27 | 4.06E-08 |
| CALM1        | T cell | 95.10%  | 96.90%  | 0.32 | 4.15E-08 |
| MIR24-2      | T cell | 29.90%  | 31.60%  | 0.32 | 4.93E-08 |
| TNRC6B       | T cell | 47.90%  | 46.00%  | 0.28 | 5.47E-08 |
| PRDM1        | T cell | 25.70%  | 6.90%   | 0.37 | 6.36E-08 |
| RBM8A        | T cell | 78.50%  | 78.70%  | 0.29 | 7.33E-08 |
| SELPLG       | T cell | 20.10%  | 4.30%   | 0.31 | 1.59E-07 |
| EEF1A1       | T cell | 100.00% | 100.00% | 0.27 | 2.25E-07 |
| PFN1         | T cell | 93.80%  | 96.00%  | 0.31 | 2.63E-07 |
| NIPBL        | T cell | 46.50%  | 41.10%  | 0.26 | 2.74E-07 |
| PHF20        | T cell | 39.60%  | 32.50%  | 0.27 | 3.66E-07 |
| RAP2B        | T cell | 22.20%  | 12.20%  | 0.33 | 4.21E-07 |
| PLIN2        | T cell | 52.80%  | 30.70%  | 0.47 | 4.82E-07 |
| ERO1LB       | T cell | 29.90%  | 25.20%  | 0.27 | 4.84E-07 |
| SOCS1        | T cell | 11.80%  | 3.60%   | 0.26 | 6.61E-07 |
| MARCKSL1     | T cell | 25.00%  | 18.50%  | 0.29 | 1.16E-06 |
| REL          | T cell | 59.00%  | 46.80%  | 0.57 | 1.17E-06 |
| RP11-356I2.4 | T cell | 12.50%  | 2.70%   | 0.26 | 2.02E-06 |
| CD44         | T cell | 90.30%  | 90.20%  | 0.36 | 2.05E-06 |
| SP100        | T cell | 53.50%  | 44.90%  | 0.29 | 2.77E-06 |
| SVIP         | T cell | 32.60%  | 20.40%  | 0.29 | 3.47E-06 |
| ATP2B1       | T cell | 53.50%  | 49.90%  | 0.34 | 5.41E-06 |
| EEF1B2       | T cell | 93.80%  | 94.90%  | 0.31 | 5.81E-06 |
| WAS          | T cell | 17.40%  | 3.90%   | 0.28 | 7.16E-06 |
| MRPS6        | T cell | 53.50%  | 49.00%  | 0.30 | 8.10E-06 |
| CFL1         | T cell | 98.60%  | 98.40%  | 0.29 | 8.39E-06 |
| ARPC2        | T cell | 89.60%  | 91.70%  | 0.25 | 1.94E-05 |
| GIMAP1       | T cell | 16.00%  | 4.20%   | 0.31 | 2.66E-05 |
| NPM1         | T cell | 98.60%  | 96.40%  | 0.28 | 4.25E-05 |
| CELF2        | T cell | 50.00%  | 41.90%  | 0.30 | 4.41E-05 |
| HSPA8        | T cell | 97.90%  | 96.10%  | 0.36 | 5.96E-05 |

|           |           |         |        |      |           |
|-----------|-----------|---------|--------|------|-----------|
| SERPINB9  | T cell    | 34.00%  | 18.50% | 0.44 | 7.80E-05  |
| GNA15     | T cell    | 20.80%  | 5.90%  | 0.32 | 7.94E-05  |
| HNRNPF    | T cell    | 67.40%  | 66.70% | 0.25 | 1.30E-04  |
| PLK3      | T cell    | 33.30%  | 24.10% | 0.28 | 1.97E-04  |
| FAM49B    | T cell    | 33.30%  | 19.40% | 0.34 | 2.75E-04  |
| RCSD1     | T cell    | 18.10%  | 4.60%  | 0.28 | 2.76E-04  |
| DNTTIP2   | T cell    | 47.20%  | 42.20% | 0.25 | 5.78E-04  |
| FERMT3    | T cell    | 22.90%  | 10.00% | 0.30 | 6.04E-04  |
| EVI2A     | T cell    | 27.10%  | 15.20% | 0.34 | 1.81E-03  |
| RAB11FIP1 | T cell    | 15.30%  | 5.30%  | 0.27 | 4.78E-03  |
| ACRC      | T cell    | 13.90%  | 8.10%  | 0.27 | 5.69E-03  |
| CD4       | T cell    | 29.90%  | 15.90% | 0.31 | 8.46E-03  |
| DUSP2     | T cell    | 18.10%  | 5.90%  | 0.25 | 1.22E-02  |
| RNASSET2  | T cell    | 38.20%  | 31.60% | 0.29 | 1.55E-02  |
| C1orf56   | T cell    | 27.10%  | 22.30% | 0.27 | 4.60E-02  |
| CTSC      | T cell    | 22.90%  | 14.20% | 0.37 | 7.23E-02  |
| UCP2      | T cell    | 29.90%  | 17.20% | 0.32 | 1.22E-01  |
| PLP2      | T cell    | 84.00%  | 79.50% | 0.29 | 1.38E-01  |
| ISG15     | T cell    | 38.20%  | 30.50% | 0.29 | 1.47E-01  |
| ARRB2     | T cell    | 27.10%  | 13.10% | 0.30 | 1.83E-01  |
| RN7SL1    | T cell    | 13.90%  | 11.40% | 0.26 | 6.49E-01  |
| CDC42EP3  | T cell    | 27.80%  | 18.10% | 0.27 | 1.00E+00  |
| TXNIP     | T cell    | 52.10%  | 44.10% | 0.30 | 1.00E+00  |
| RPS4Y1    | T cell    | 47.20%  | 36.20% | 0.28 | 1.00E+00  |
| RGS2      | T cell    | 64.60%  | 59.50% | 0.28 | 1.00E+00  |
| TPSAB1    | Mast cell | 100.00% | 10.70% | 5.34 | 0.00E+00  |
| CPA3      | Mast cell | 97.50%  | 1.00%  | 2.52 | 1.00E-270 |
| RGS13     | Mast cell | 85.00%  | 1.40%  | 1.94 | 3.27E-207 |
| SELK      | Mast cell | 97.50%  | 82.20% | 1.45 | 1.07E-197 |
| VWA5A     | Mast cell | 82.50%  | 17.20% | 1.38 | 1.70E-192 |
| SLC18A2   | Mast cell | 77.50%  | 0.30%  | 1.49 | 1.31E-182 |
| GLUL      | Mast cell | 98.30%  | 75.90% | 1.81 | 4.13E-180 |
| CD69      | Mast cell | 84.20%  | 3.00%  | 2.50 | 1.96E-164 |
| GCSAML    | Mast cell | 69.20%  | 0.30%  | 1.44 | 8.03E-156 |
| HPGDS     | Mast cell | 91.70%  | 6.60%  | 2.10 | 7.39E-150 |
| CALB2     | Mast cell | 64.20%  | 0.20%  | 1.16 | 1.88E-144 |
| RAB27B    | Mast cell | 64.20%  | 0.40%  | 1.21 | 8.02E-142 |
| C1orf186  | Mast cell | 62.50%  | 0.20%  | 1.09 | 7.47E-138 |
| HDC       | Mast cell | 60.00%  | 0.40%  | 1.23 | 1.25E-133 |
| KIT       | Mast cell | 61.70%  | 0.60%  | 1.12 | 4.35E-133 |
| IL1RL1    | Mast cell | 71.70%  | 1.20%  | 1.44 | 1.62E-129 |

|               |           |         |         |      |           |
|---------------|-----------|---------|---------|------|-----------|
| CTSG          | Mast cell | 50.80%  | 1.00%   | 1.53 | 1.14E-118 |
| SRGN          | Mast cell | 100.00% | 43.40%  | 2.15 | 2.95E-116 |
| RAC2          | Mast cell | 77.50%  | 4.30%   | 1.36 | 2.62E-113 |
| GPR65         | Mast cell | 66.70%  | 2.00%   | 1.49 | 4.73E-111 |
| SAMSN1        | Mast cell | 83.30%  | 5.20%   | 1.87 | 2.36E-110 |
| CST7          | Mast cell | 73.30%  | 2.00%   | 1.26 | 3.70E-109 |
| ACSL4         | Mast cell | 67.50%  | 21.00%  | 1.01 | 6.15E-105 |
| CREM          | Mast cell | 81.70%  | 45.20%  | 1.62 | 5.31E-104 |
| FCER1A        | Mast cell | 79.20%  | 4.80%   | 1.13 | 1.07E-102 |
| HPGD          | Mast cell | 66.70%  | 3.80%   | 1.32 | 3.51E-102 |
| RP11-354E11.2 | Mast cell | 42.50%  | 0.10%   | 0.78 | 3.24E-93  |
| GATA2         | Mast cell | 59.20%  | 5.50%   | 1.25 | 1.14E-92  |
| BIRC3         | Mast cell | 83.30%  | 22.70%  | 2.04 | 2.91E-92  |
| RGS2          | Mast cell | 92.50%  | 59.20%  | 1.68 | 1.12E-89  |
| SDCBP         | Mast cell | 97.50%  | 90.50%  | 1.13 | 1.20E-82  |
| AC020571.3    | Mast cell | 41.70%  | 0.30%   | 0.90 | 1.60E-81  |
| ELF1          | Mast cell | 80.00%  | 51.70%  | 0.95 | 1.63E-75  |
| RAB38         | Mast cell | 42.50%  | 1.60%   | 0.95 | 6.87E-75  |
| DUSP14        | Mast cell | 73.30%  | 48.90%  | 0.96 | 2.68E-74  |
| FCER1G        | Mast cell | 94.20%  | 20.10%  | 1.02 | 1.10E-70  |
| KRT1          | Mast cell | 35.80%  | 0.20%   | 0.69 | 3.05E-70  |
| REL           | Mast cell | 88.30%  | 46.50%  | 1.38 | 3.70E-67  |
| SMYD3         | Mast cell | 51.70%  | 10.40%  | 0.70 | 6.42E-67  |
| VAPA          | Mast cell | 95.00%  | 77.90%  | 0.82 | 1.59E-65  |
| LAX1          | Mast cell | 36.70%  | 0.40%   | 0.67 | 2.90E-65  |
| RHOH          | Mast cell | 51.70%  | 2.10%   | 1.00 | 1.52E-63  |
| CTNBL1        | Mast cell | 62.50%  | 28.00%  | 0.74 | 2.91E-63  |
| ADRB2         | Mast cell | 58.30%  | 11.20%  | 0.95 | 1.56E-62  |
| CD52          | Mast cell | 61.70%  | 4.60%   | 1.38 | 4.85E-61  |
| PLIN2         | Mast cell | 65.80%  | 30.60%  | 1.36 | 1.67E-60  |
| FTH1          | Mast cell | 100.00% | 100.00% | 0.97 | 3.19E-60  |
| TYROBP        | Mast cell | 89.20%  | 21.20%  | 0.57 | 3.57E-60  |
| MAOB          | Mast cell | 54.20%  | 15.70%  | 0.78 | 9.94E-60  |
| CPEB4         | Mast cell | 68.30%  | 34.10%  | 0.91 | 1.46E-58  |
| RGS1          | Mast cell | 81.70%  | 16.20%  | 1.95 | 1.50E-58  |
| RPL36AL       | Mast cell | 100.00% | 96.60%  | 0.68 | 1.29E-55  |
| BATF          | Mast cell | 45.80%  | 2.30%   | 0.94 | 4.86E-55  |
| AP1S3         | Mast cell | 36.70%  | 1.50%   | 0.62 | 5.25E-55  |
| LAT           | Mast cell | 46.70%  | 3.00%   | 0.77 | 1.20E-54  |
| SDPR          | Mast cell | 50.00%  | 6.20%   | 1.06 | 2.14E-54  |
| ALOX5AP       | Mast cell | 79.20%  | 13.90%  | 1.19 | 5.19E-53  |

|              |           |         |        |      |          |
|--------------|-----------|---------|--------|------|----------|
| NSMCE1       | Mast cell | 60.80%  | 35.90% | 0.64 | 5.47E-53 |
| CKLF         | Mast cell | 69.20%  | 36.70% | 0.79 | 2.49E-52 |
| MS4A2        | Mast cell | 25.80%  | 0.00%  | 0.41 | 6.66E-52 |
| ZNF331       | Mast cell | 59.20%  | 24.30% | 1.12 | 1.67E-50 |
| TNIK         | Mast cell | 35.80%  | 2.00%  | 0.55 | 7.73E-50 |
| RPL34        | Mast cell | 100.00% | 99.90% | 0.63 | 4.36E-49 |
| RBM8A        | Mast cell | 91.70%  | 78.60% | 0.72 | 1.25E-48 |
| CPM          | Mast cell | 63.30%  | 10.80% | 1.07 | 2.88E-48 |
| CDC42EP3     | Mast cell | 65.00%  | 17.70% | 1.09 | 5.24E-48 |
| LAPTM5       | Mast cell | 87.50%  | 21.60% | 1.14 | 7.25E-48 |
| SVOPL        | Mast cell | 20.80%  | 0.00%  | 0.30 | 3.61E-47 |
| TESPA1       | Mast cell | 29.20%  | 0.30%  | 0.54 | 6.45E-46 |
| ARHGDI8      | Mast cell | 82.50%  | 20.90% | 1.13 | 1.06E-45 |
| LAT2         | Mast cell | 50.00%  | 4.60%  | 0.72 | 2.84E-44 |
| CTD-3203P2.2 | Mast cell | 26.70%  | 0.50%  | 0.53 | 7.22E-44 |
| PTGS2        | Mast cell | 70.00%  | 28.60% | 1.31 | 7.34E-44 |
| NTRK1        | Mast cell | 25.00%  | 0.80%  | 0.47 | 2.76E-43 |
| PAG1         | Mast cell | 43.30%  | 5.10%  | 0.74 | 2.00E-42 |
| RPS29        | Mast cell | 100.00% | 99.40% | 0.60 | 6.01E-42 |
| GRAP2        | Mast cell | 26.70%  | 0.30%  | 0.36 | 9.57E-42 |
| DDIT4        | Mast cell | 85.00%  | 61.00% | 1.16 | 5.23E-41 |
| ARHGAP25     | Mast cell | 30.00%  | 1.20%  | 0.60 | 5.20E-40 |
| KLRG1        | Mast cell | 31.70%  | 1.40%  | 0.53 | 5.43E-40 |
| ASAH1        | Mast cell | 76.70%  | 51.20% | 0.74 | 1.54E-39 |
| RPL7         | Mast cell | 100.00% | 99.70% | 0.50 | 1.59E-39 |
| CD82         | Mast cell | 72.50%  | 34.30% | 0.81 | 1.95E-39 |
| PAK1         | Mast cell | 43.30%  | 11.50% | 0.67 | 3.36E-39 |
| DUSP6        | Mast cell | 58.30%  | 17.90% | 1.04 | 3.71E-39 |
| STX11        | Mast cell | 65.00%  | 15.40% | 0.91 | 8.51E-39 |
| RPL21        | Mast cell | 100.00% | 99.90% | 0.47 | 4.12E-38 |
| RAB9A        | Mast cell | 41.70%  | 23.70% | 0.63 | 1.19E-37 |
| GALNT3       | Mast cell | 26.70%  | 0.70%  | 0.47 | 1.31E-37 |
| STK17B       | Mast cell | 65.00%  | 16.80% | 0.85 | 1.32E-37 |
| MARCH1       | Mast cell | 33.30%  | 15.30% | 0.52 | 4.95E-37 |
| CD37         | Mast cell | 61.70%  | 10.20% | 0.91 | 5.58E-37 |
| TDRD3        | Mast cell | 37.50%  | 13.10% | 0.56 | 7.28E-37 |
| NDUFA4       | Mast cell | 100.00% | 92.90% | 0.65 | 1.33E-36 |
| NFATC1       | Mast cell | 35.00%  | 20.60% | 0.54 | 1.77E-36 |
| TANK         | Mast cell | 65.00%  | 38.70% | 0.66 | 3.28E-36 |
| BTK          | Mast cell | 41.70%  | 3.60%  | 0.68 | 8.94E-36 |
| TPSD1        | Mast cell | 20.00%  | 0.10%  | 0.31 | 2.01E-35 |

|               |           |         |        |      |          |
|---------------|-----------|---------|--------|------|----------|
| CAPG          | Mast cell | 90.00%  | 63.10% | 0.89 | 3.21E-35 |
| PFDN5         | Mast cell | 99.20%  | 98.20% | 0.54 | 6.87E-35 |
| DUSP10        | Mast cell | 59.20%  | 27.00% | 0.73 | 7.84E-35 |
| TPSG1         | Mast cell | 18.30%  | 0.00%  | 0.36 | 1.14E-34 |
| VAMP8         | Mast cell | 70.00%  | 18.70% | 0.51 | 1.59E-34 |
| ANKRD28       | Mast cell | 72.50%  | 58.90% | 0.78 | 2.52E-34 |
| CD83          | Mast cell | 78.30%  | 26.00% | 1.21 | 3.46E-34 |
| CLIC1         | Mast cell | 100.00% | 94.70% | 0.64 | 9.59E-33 |
| FDX1          | Mast cell | 31.70%  | 14.10% | 0.63 | 1.02E-32 |
| PTGS1         | Mast cell | 44.20%  | 13.50% | 0.62 | 1.26E-32 |
| GPBP1         | Mast cell | 75.80%  | 57.30% | 0.62 | 2.49E-32 |
| CD44          | Mast cell | 98.30%  | 90.10% | 0.72 | 1.03E-31 |
| TESC          | Mast cell | 30.00%  | 1.50%  | 0.47 | 1.59E-31 |
| PHACTR1       | Mast cell | 46.70%  | 6.20%  | 0.78 | 3.05E-31 |
| SVIP          | Mast cell | 51.70%  | 20.30% | 0.63 | 3.59E-31 |
| RP11-501J20.5 | Mast cell | 15.80%  | 0.00%  | 0.26 | 6.83E-31 |
| ANXA1         | Mast cell | 99.20%  | 98.50% | 0.86 | 1.13E-30 |
| HMGN3         | Mast cell | 79.20%  | 65.40% | 0.59 | 1.15E-30 |
| LEO1          | Mast cell | 44.20%  | 17.10% | 0.52 | 2.02E-30 |
| NTM           | Mast cell | 29.20%  | 5.10%  | 0.53 | 2.13E-30 |
| ENPP3         | Mast cell | 17.50%  | 0.40%  | 0.36 | 4.42E-30 |
| TSTD1         | Mast cell | 37.50%  | 5.90%  | 0.58 | 1.45E-29 |
| RPS27A        | Mast cell | 100.00% | 99.80% | 0.42 | 4.63E-29 |
| RP11-557H15.4 | Mast cell | 15.00%  | 0.20%  | 0.29 | 5.61E-29 |
| TRIM63        | Mast cell | 15.00%  | 0.00%  | 0.41 | 6.86E-29 |
| LMNB1         | Mast cell | 20.00%  | 1.50%  | 0.46 | 1.96E-28 |
| RASSF5        | Mast cell | 37.50%  | 5.90%  | 0.64 | 3.16E-28 |
| SCIN          | Mast cell | 19.20%  | 0.90%  | 0.40 | 1.17E-27 |
| VPS37B        | Mast cell | 42.50%  | 14.00% | 0.60 | 2.68E-27 |
| GALC          | Mast cell | 34.20%  | 6.70%  | 0.48 | 5.62E-27 |
| ALDH1A1       | Mast cell | 47.50%  | 6.90%  | 0.69 | 7.60E-27 |
| B4GALT5       | Mast cell | 50.80%  | 19.10% | 0.55 | 9.54E-27 |
| PTPN1         | Mast cell | 55.80%  | 34.20% | 0.61 | 1.99E-26 |
| RPL14         | Mast cell | 100.00% | 99.50% | 0.48 | 3.05E-26 |
| SUB1          | Mast cell | 88.30%  | 82.20% | 0.53 | 1.19E-25 |
| RPL26         | Mast cell | 100.00% | 99.70% | 0.38 | 1.58E-25 |
| RPS27         | Mast cell | 100.00% | 99.90% | 0.38 | 5.82E-25 |
| GNPTAB        | Mast cell | 31.70%  | 9.80%  | 0.49 | 8.42E-25 |
| RHOG          | Mast cell | 57.50%  | 42.60% | 0.61 | 1.05E-24 |
| PRNP          | Mast cell | 78.30%  | 68.80% | 0.57 | 2.90E-24 |



|               |           |         |         |      |          |
|---------------|-----------|---------|---------|------|----------|
| METTL21A      | Mast cell | 26.70%  | 13.50%  | 0.45 | 2.94E-24 |
| AREG          | Mast cell | 22.50%  | 1.60%   | 0.60 | 3.54E-24 |
| SGK1          | Mast cell | 91.70%  | 73.50%  | 0.82 | 4.13E-24 |
| MAPRE1        | Mast cell | 59.20%  | 43.90%  | 0.48 | 4.90E-24 |
| RNF145        | Mast cell | 47.50%  | 30.20%  | 0.55 | 1.64E-23 |
| TNFRSF4       | Mast cell | 25.80%  | 1.60%   | 0.36 | 2.06E-23 |
| RPL37A        | Mast cell | 100.00% | 99.90%  | 0.44 | 2.47E-23 |
| KRT19         | Mast cell | 12.50%  | 0.00%   | 0.27 | 5.83E-23 |
| RPS14         | Mast cell | 100.00% | 99.60%  | 0.37 | 2.38E-22 |
| LPXN          | Mast cell | 40.00%  | 9.30%   | 0.71 | 5.19E-22 |
| BST2          | Mast cell | 70.80%  | 28.10%  | 0.74 | 7.56E-22 |
| LYST          | Mast cell | 38.30%  | 18.00%  | 0.48 | 2.14E-21 |
| RPL32         | Mast cell | 100.00% | 99.80%  | 0.38 | 3.57E-21 |
| ARHGAP18      | Mast cell | 59.20%  | 16.90%  | 0.62 | 1.04E-20 |
| ID2           | Mast cell | 94.20%  | 89.50%  | 0.85 | 1.05E-20 |
| SAT1          | Mast cell | 100.00% | 95.30%  | 0.57 | 1.16E-20 |
| RENBP         | Mast cell | 35.80%  | 5.40%   | 0.56 | 3.13E-20 |
| MLPH          | Mast cell | 19.20%  | 1.20%   | 0.28 | 6.47E-20 |
| NMT2          | Mast cell | 28.30%  | 10.60%  | 0.41 | 7.78E-20 |
| RPS25         | Mast cell | 100.00% | 99.80%  | 0.36 | 1.14E-19 |
| RPL41         | Mast cell | 100.00% | 100.00% | 0.29 | 1.15E-19 |
| RSL24D1       | Mast cell | 83.30%  | 74.40%  | 0.47 | 1.79E-19 |
| STARD10       | Mast cell | 21.70%  | 5.80%   | 0.35 | 2.48E-19 |
| AQP2          | Mast cell | 10.80%  | 0.10%   | 0.26 | 2.60E-19 |
| ALOX5         | Mast cell | 29.20%  | 3.50%   | 0.48 | 2.89E-19 |
| STMN1         | Mast cell | 53.30%  | 16.30%  | 0.69 | 4.34E-19 |
| MAP3K8        | Mast cell | 70.80%  | 52.20%  | 0.60 | 4.49E-19 |
| SLC26A2       | Mast cell | 37.50%  | 17.20%  | 0.42 | 4.59E-19 |
| HAVCR2        | Mast cell | 36.70%  | 5.60%   | 0.55 | 5.21E-19 |
| IL4R          | Mast cell | 33.30%  | 12.00%  | 0.47 | 5.46E-19 |
| NFKBIA        | Mast cell | 99.20%  | 92.30%  | 0.62 | 7.07E-19 |
| ALG13         | Mast cell | 41.70%  | 26.70%  | 0.42 | 5.20E-18 |
| PRKX          | Mast cell | 26.70%  | 3.00%   | 0.44 | 5.44E-18 |
| RP11-620J15.3 | Mast cell | 30.80%  | 9.40%   | 0.37 | 6.30E-18 |
| LTC4S         | Mast cell | 40.00%  | 7.10%   | 0.60 | 6.87E-18 |
| SEC22C        | Mast cell | 42.50%  | 28.50%  | 0.40 | 6.94E-18 |
| CTSW          | Mast cell | 20.80%  | 1.40%   | 0.30 | 7.04E-18 |
| RPS18         | Mast cell | 100.00% | 99.70%  | 0.26 | 7.36E-18 |
| C21orf91      | Mast cell | 28.30%  | 7.60%   | 0.39 | 1.05E-17 |
| UBB           | Mast cell | 98.30%  | 99.10%  | 0.47 | 1.70E-17 |
| SNHG8         | Mast cell | 85.80%  | 71.60%  | 0.51 | 2.15E-17 |

|           |           |         |        |      |          |
|-----------|-----------|---------|--------|------|----------|
| PLGRKT    | Mast cell | 39.20%  | 24.20% | 0.37 | 3.06E-17 |
| RPL11     | Mast cell | 100.00% | 99.90% | 0.35 | 3.58E-17 |
| PRDX1     | Mast cell | 97.50%  | 96.10% | 0.54 | 3.61E-17 |
| H3F3B     | Mast cell | 100.00% | 99.70% | 0.44 | 6.85E-17 |
| HEY1      | Mast cell | 23.30%  | 3.50%  | 0.51 | 1.07E-16 |
| TMEM233   | Mast cell | 18.30%  | 2.10%  | 0.31 | 2.31E-16 |
| RPL39     | Mast cell | 100.00% | 99.30% | 0.32 | 4.56E-16 |
| MAPK6     | Mast cell | 50.00%  | 32.00% | 0.46 | 7.24E-16 |
| BHLHE40   | Mast cell | 80.80%  | 64.20% | 0.56 | 8.15E-16 |
| FER       | Mast cell | 36.70%  | 16.20% | 0.40 | 1.24E-15 |
| FAU       | Mast cell | 100.00% | 99.50% | 0.34 | 1.97E-15 |
| RPS28     | Mast cell | 100.00% | 99.80% | 0.32 | 2.25E-15 |
| SFT2D1    | Mast cell | 52.50%  | 51.30% | 0.32 | 2.53E-15 |
| RPS13     | Mast cell | 100.00% | 99.50% | 0.28 | 5.65E-15 |
| TMEM66    | Mast cell | 95.00%  | 85.30% | 0.47 | 6.33E-15 |
| YME1L1    | Mast cell | 50.80%  | 45.60% | 0.39 | 6.74E-15 |
| MBOAT7    | Mast cell | 26.70%  | 8.00%  | 0.37 | 9.65E-15 |
| RPS15     | Mast cell | 100.00% | 99.80% | 0.30 | 1.07E-14 |
| ACOT7     | Mast cell | 37.50%  | 18.00% | 0.44 | 1.14E-14 |
| ZFP91     | Mast cell | 34.20%  | 24.10% | 0.35 | 1.15E-14 |
| SELT      | Mast cell | 68.30%  | 64.50% | 0.36 | 1.40E-14 |
| C10orf128 | Mast cell | 28.30%  | 4.10%  | 0.39 | 1.79E-14 |
| DDX5      | Mast cell | 100.00% | 98.10% | 0.49 | 2.31E-14 |
| RPL38     | Mast cell | 100.00% | 99.20% | 0.40 | 2.89E-14 |
| SLC2A3    | Mast cell | 63.30%  | 34.60% | 0.60 | 3.05E-14 |
| RAB33A    | Mast cell | 15.80%  | 2.10%  | 0.29 | 4.25E-14 |
| ATP6V1F   | Mast cell | 80.00%  | 75.50% | 0.41 | 5.78E-14 |
| DBI       | Mast cell | 91.70%  | 83.80% | 0.45 | 6.61E-14 |
| NFKB1     | Mast cell | 63.30%  | 34.20% | 0.63 | 8.10E-14 |
| DNAJB9    | Mast cell | 69.20%  | 61.10% | 0.45 | 8.36E-14 |
| RPL27A    | Mast cell | 100.00% | 99.60% | 0.32 | 1.09E-13 |
| FAM195A   | Mast cell | 30.80%  | 13.50% | 0.35 | 1.56E-13 |
| GABPB1    | Mast cell | 23.30%  | 10.50% | 0.33 | 1.75E-13 |
| RILPL2    | Mast cell | 59.20%  | 31.90% | 0.53 | 1.81E-13 |
| VEGFA     | Mast cell | 46.70%  | 22.30% | 0.49 | 2.13E-13 |
| CD53      | Mast cell | 42.50%  | 10.50% | 0.46 | 2.26E-13 |
| CLCN3     | Mast cell | 32.50%  | 17.70% | 0.35 | 2.38E-13 |
| GMFG      | Mast cell | 50.00%  | 16.10% | 0.37 | 2.71E-13 |
| RPL30     | Mast cell | 100.00% | 99.60% | 0.35 | 2.89E-13 |
| SLC1A5    | Mast cell | 48.30%  | 36.50% | 0.41 | 4.75E-13 |
| AKAP13    | Mast cell | 77.50%  | 61.70% | 0.50 | 4.97E-13 |

|          |           |         |        |      |          |
|----------|-----------|---------|--------|------|----------|
| SLC2A6   | Mast cell | 23.30%  | 4.60%  | 0.34 | 6.59E-13 |
| FAM107B  | Mast cell | 51.70%  | 30.60% | 0.45 | 7.13E-13 |
| CSF2     | Mast cell | 13.30%  | 0.60%  | 0.85 | 7.26E-13 |
| TNFRSF9  | Mast cell | 18.30%  | 3.30%  | 0.29 | 7.33E-13 |
| TRIM24   | Mast cell | 18.30%  | 6.80%  | 0.29 | 7.78E-13 |
| HAX1     | Mast cell | 50.80%  | 53.00% | 0.26 | 8.12E-13 |
| C1orf228 | Mast cell | 15.00%  | 0.70%  | 0.25 | 8.37E-13 |
| EIF1     | Mast cell | 100.00% | 99.80% | 0.28 | 1.07E-12 |
| EMR2     | Mast cell | 20.00%  | 2.20%  | 0.31 | 1.19E-12 |
| TPST2    | Mast cell | 35.80%  | 20.50% | 0.37 | 1.92E-12 |
| RPL35    | Mast cell | 100.00% | 99.50% | 0.31 | 2.08E-12 |
| SYAP1    | Mast cell | 55.00%  | 40.90% | 0.40 | 2.50E-12 |
| TNFRSF18 | Mast cell | 27.50%  | 4.70%  | 0.39 | 3.32E-12 |
| RPL35A   | Mast cell | 100.00% | 99.60% | 0.30 | 3.42E-12 |
| PHF20    | Mast cell | 42.50%  | 32.50% | 0.37 | 4.27E-12 |
| FTL      | Mast cell | 100.00% | 99.80% | 0.28 | 4.33E-12 |
| LDHB     | Mast cell | 70.80%  | 57.70% | 0.43 | 4.37E-12 |
| RPS4Y1   | Mast cell | 55.00%  | 36.20% | 0.69 | 4.57E-12 |
| M6PR     | Mast cell | 50.00%  | 34.30% | 0.38 | 9.65E-12 |
| PRDX6    | Mast cell | 85.80%  | 80.00% | 0.37 | 1.25E-11 |
| MSRA     | Mast cell | 25.00%  | 6.90%  | 0.36 | 1.38E-11 |
| RPS4X    | Mast cell | 100.00% | 99.80% | 0.34 | 1.51E-11 |
| PTPRC    | Mast cell | 36.70%  | 10.60% | 0.28 | 1.72E-11 |
| IL18R1   | Mast cell | 15.80%  | 1.00%  | 0.27 | 1.93E-11 |
| MECP2    | Mast cell | 38.30%  | 26.10% | 0.36 | 2.27E-11 |
| SYTL3    | Mast cell | 31.70%  | 7.60%  | 0.39 | 2.43E-11 |
| POLR3GL  | Mast cell | 46.70%  | 39.90% | 0.30 | 3.21E-11 |
| OSTF1    | Mast cell | 50.80%  | 35.50% | 0.38 | 3.37E-11 |
| STK4     | Mast cell | 40.80%  | 17.00% | 0.55 | 3.53E-11 |
| DHRS9    | Mast cell | 11.70%  | 1.00%  | 0.45 | 3.71E-11 |
| PTPN7    | Mast cell | 18.30%  | 1.60%  | 0.33 | 3.85E-11 |
| RPS6     | Mast cell | 100.00% | 99.80% | 0.27 | 4.65E-11 |
| U2AF1    | Mast cell | 84.20%  | 77.00% | 0.39 | 7.50E-11 |
| UBE2D3   | Mast cell | 90.00%  | 85.00% | 0.38 | 9.47E-11 |
| STXBP2   | Mast cell | 27.50%  | 4.60%  | 0.35 | 1.00E-10 |
| RPL31    | Mast cell | 100.00% | 99.60% | 0.31 | 1.63E-10 |
| PTMA     | Mast cell | 100.00% | 99.90% | 0.28 | 2.12E-10 |
| RASGEF1B | Mast cell | 49.20%  | 22.40% | 0.60 | 2.29E-10 |
| SPINT2   | Mast cell | 30.80%  | 6.20%  | 0.36 | 2.88E-10 |
| RAB32    | Mast cell | 47.50%  | 34.50% | 0.36 | 3.43E-10 |
| OSM      | Mast cell | 20.80%  | 3.00%  | 0.45 | 3.65E-10 |

|          |           |         |         |      |          |
|----------|-----------|---------|---------|------|----------|
| OSBPL8   | Mast cell | 70.80%  | 61.20%  | 0.36 | 5.19E-10 |
| PPP2CA   | Mast cell | 58.30%  | 46.70%  | 0.36 | 5.59E-10 |
| SERPINB1 | Mast cell | 57.50%  | 50.20%  | 0.40 | 7.46E-10 |
| RGS10    | Mast cell | 70.00%  | 50.70%  | 0.45 | 7.67E-10 |
| CREB3    | Mast cell | 45.00%  | 35.90%  | 0.29 | 1.08E-09 |
| MALAT1   | Mast cell | 100.00% | 100.00% | 0.30 | 2.45E-09 |
| TNFAIP8  | Mast cell | 45.00%  | 25.90%  | 0.61 | 4.05E-09 |
| AMD1     | Mast cell | 80.80%  | 73.40%  | 0.40 | 4.32E-09 |
| RAD21    | Mast cell | 43.30%  | 39.70%  | 0.28 | 4.52E-09 |
| TMEM9B   | Mast cell | 53.30%  | 45.50%  | 0.30 | 5.36E-09 |
| TDG      | Mast cell | 39.20%  | 29.10%  | 0.30 | 6.10E-09 |
| SQSTM1   | Mast cell | 98.30%  | 92.40%  | 0.50 | 6.44E-09 |
| EXOSC8   | Mast cell | 37.50%  | 25.80%  | 0.29 | 6.66E-09 |
| HMG1     | Mast cell | 72.50%  | 60.70%  | 0.38 | 6.75E-09 |
| NFKB1    | Mast cell | 33.30%  | 28.50%  | 0.25 | 7.17E-09 |
| DDIT3    | Mast cell | 42.50%  | 29.40%  | 0.43 | 8.30E-09 |
| IL2RG    | Mast cell | 19.20%  | 2.60%   | 0.28 | 9.04E-09 |
| CD33     | Mast cell | 22.50%  | 3.40%   | 0.29 | 1.22E-08 |
| CYLD     | Mast cell | 46.70%  | 32.40%  | 0.37 | 1.33E-08 |
| ARL6IP1  | Mast cell | 70.80%  | 66.10%  | 0.37 | 1.37E-08 |
| SPATA13  | Mast cell | 20.00%  | 6.70%   | 0.25 | 1.45E-08 |
| STAG2    | Mast cell | 43.30%  | 38.20%  | 0.30 | 1.62E-08 |
| ZEB2     | Mast cell | 66.70%  | 49.60%  | 0.41 | 1.86E-08 |
| ACER3    | Mast cell | 25.00%  | 12.90%  | 0.30 | 1.90E-08 |
| CD274    | Mast cell | 16.70%  | 3.40%   | 0.25 | 2.03E-08 |
| ATP6V1G1 | Mast cell | 90.80%  | 87.40%  | 0.33 | 2.11E-08 |
| AHR      | Mast cell | 57.50%  | 37.20%  | 0.49 | 2.36E-08 |
| HNRNP1   | Mast cell | 72.50%  | 69.90%  | 0.33 | 2.96E-08 |
| SH3BP1   | Mast cell | 39.20%  | 34.00%  | 0.28 | 2.99E-08 |
| CTSD     | Mast cell | 83.30%  | 80.40%  | 0.46 | 3.07E-08 |
| PABPC1   | Mast cell | 98.30%  | 92.90%  | 0.36 | 3.11E-08 |
| KDM6B    | Mast cell | 70.00%  | 55.60%  | 0.46 | 3.24E-08 |
| YWHAZ    | Mast cell | 80.00%  | 74.20%  | 0.36 | 3.78E-08 |
| BTN2A2   | Mast cell | 19.20%  | 4.90%   | 0.26 | 3.83E-08 |
| RHOBTB3  | Mast cell | 33.30%  | 21.30%  | 0.33 | 4.02E-08 |
| BEX4     | Mast cell | 33.30%  | 17.80%  | 0.35 | 4.08E-08 |
| PDCD4    | Mast cell | 45.80%  | 33.30%  | 0.35 | 5.12E-08 |
| RPS3     | Mast cell | 100.00% | 99.40%  | 0.31 | 6.69E-08 |
| GTF3C6   | Mast cell | 58.30%  | 50.30%  | 0.29 | 7.00E-08 |
| SKIL     | Mast cell | 67.50%  | 52.80%  | 0.40 | 9.68E-08 |
| ATP1B3   | Mast cell | 74.20%  | 70.30%  | 0.37 | 1.02E-07 |

|          |           |         |        |      |          |
|----------|-----------|---------|--------|------|----------|
| CNRIP1   | Mast cell | 43.30%  | 37.40% | 0.26 | 1.22E-07 |
| NAP1L1   | Mast cell | 93.30%  | 87.80% | 0.37 | 1.25E-07 |
| CYCS     | Mast cell | 86.70%  | 81.70% | 0.40 | 1.51E-07 |
| EIF3E    | Mast cell | 92.50%  | 91.10% | 0.34 | 1.51E-07 |
| CHD2     | Mast cell | 50.00%  | 32.70% | 0.39 | 2.11E-07 |
| JUND     | Mast cell | 71.70%  | 59.50% | 0.38 | 2.18E-07 |
| PEPD     | Mast cell | 46.70%  | 42.70% | 0.32 | 2.28E-07 |
| ANP32E   | Mast cell | 57.50%  | 39.30% | 0.36 | 2.31E-07 |
| EMP3     | Mast cell | 100.00% | 94.50% | 0.31 | 2.60E-07 |
| NXT1     | Mast cell | 52.50%  | 40.50% | 0.33 | 2.90E-07 |
| UQCRB    | Mast cell | 100.00% | 95.60% | 0.30 | 2.94E-07 |
| TIPARP   | Mast cell | 70.00%  | 51.00% | 0.49 | 3.11E-07 |
| MRPL14   | Mast cell | 50.80%  | 43.80% | 0.27 | 3.47E-07 |
| ACTR3    | Mast cell | 73.30%  | 61.60% | 0.37 | 3.83E-07 |
| RAB8B    | Mast cell | 26.70%  | 19.60% | 0.27 | 4.39E-07 |
| STX3     | Mast cell | 27.50%  | 13.60% | 0.32 | 5.30E-07 |
| RPL36    | Mast cell | 100.00% | 99.20% | 0.29 | 6.58E-07 |
| DCXR     | Mast cell | 35.80%  | 26.40% | 0.27 | 7.84E-07 |
| TM6SF1   | Mast cell | 19.20%  | 3.80%  | 0.33 | 8.50E-07 |
| KMT2E    | Mast cell | 70.80%  | 59.10% | 0.38 | 1.03E-06 |
| PTPN6    | Mast cell | 24.20%  | 5.60%  | 0.28 | 1.19E-06 |
| NFKBID   | Mast cell | 40.00%  | 15.50% | 0.39 | 1.41E-06 |
| SLC44A1  | Mast cell | 31.70%  | 23.40% | 0.28 | 1.48E-06 |
| FXYS5    | Mast cell | 96.70%  | 82.30% | 0.33 | 1.58E-06 |
| COX17    | Mast cell | 77.50%  | 67.20% | 0.35 | 1.58E-06 |
| IL18     | Mast cell | 24.20%  | 5.10%  | 0.35 | 1.78E-06 |
| RPL23    | Mast cell | 99.20%  | 99.10% | 0.27 | 2.26E-06 |
| FAM96B   | Mast cell | 69.20%  | 66.10% | 0.27 | 2.28E-06 |
| ZFAS1    | Mast cell | 88.30%  | 90.30% | 0.32 | 2.59E-06 |
| LCP1     | Mast cell | 31.70%  | 9.00%  | 0.34 | 2.75E-06 |
| RPS20    | Mast cell | 100.00% | 99.80% | 0.26 | 3.14E-06 |
| RPL24    | Mast cell | 100.00% | 99.30% | 0.28 | 3.25E-06 |
| RELB     | Mast cell | 25.80%  | 14.00% | 0.27 | 4.00E-06 |
| ARPP19   | Mast cell | 41.70%  | 36.20% | 0.25 | 4.38E-06 |
| STXBP3   | Mast cell | 39.20%  | 27.50% | 0.28 | 4.64E-06 |
| MT-ND2   | Mast cell | 100.00% | 99.60% | 0.26 | 4.80E-06 |
| ARHGAP15 | Mast cell | 18.30%  | 3.30%  | 0.29 | 7.68E-06 |
| RBBP8    | Mast cell | 25.00%  | 11.70% | 0.26 | 1.24E-05 |
| CALM2    | Mast cell | 98.30%  | 97.90% | 0.33 | 1.65E-05 |
| RPL22    | Mast cell | 100.00% | 99.20% | 0.27 | 1.76E-05 |
| LEPROTL1 | Mast cell | 40.00%  | 27.00% | 0.30 | 2.23E-05 |

|          |           |         |        |      |          |
|----------|-----------|---------|--------|------|----------|
| NRIP3    | Mast cell | 20.80%  | 11.40% | 0.26 | 2.24E-05 |
| HCST     | Mast cell | 31.70%  | 10.70% | 0.31 | 2.60E-05 |
| EIF3D    | Mast cell | 70.80%  | 67.50% | 0.25 | 2.96E-05 |
| DENND4A  | Mast cell | 25.00%  | 9.00%  | 0.26 | 3.35E-05 |
| AKNA     | Mast cell | 23.30%  | 7.80%  | 0.26 | 3.64E-05 |
| PNPLA8   | Mast cell | 45.00%  | 36.80% | 0.27 | 4.00E-05 |
| ATP5G2   | Mast cell | 91.70%  | 88.80% | 0.30 | 4.02E-05 |
| CDC42    | Mast cell | 80.80%  | 78.00% | 0.28 | 4.66E-05 |
| BMP2K    | Mast cell | 27.50%  | 10.40% | 0.31 | 4.86E-05 |
| TAF9     | Mast cell | 62.50%  | 59.00% | 0.26 | 8.83E-05 |
| NR4A2    | Mast cell | 74.20%  | 55.40% | 0.48 | 9.73E-05 |
| MAST4    | Mast cell | 25.80%  | 9.80%  | 0.30 | 9.88E-05 |
| H2AFZ    | Mast cell | 95.00%  | 91.10% | 0.32 | 1.13E-04 |
| LITAF    | Mast cell | 70.00%  | 61.10% | 0.32 | 1.27E-04 |
| LPCAT2   | Mast cell | 30.00%  | 16.80% | 0.32 | 1.50E-04 |
| IDI1     | Mast cell | 52.50%  | 45.10% | 0.31 | 1.70E-04 |
| CLK1     | Mast cell | 70.00%  | 59.90% | 0.34 | 2.03E-04 |
| ELL2     | Mast cell | 46.70%  | 38.40% | 0.32 | 2.06E-04 |
| BAZ1A    | Mast cell | 63.30%  | 56.90% | 0.35 | 2.21E-04 |
| OST4     | Mast cell | 97.50%  | 93.70% | 0.31 | 2.39E-04 |
| MT-CO2   | Mast cell | 99.20%  | 99.40% | 0.28 | 2.57E-04 |
| RBM39    | Mast cell | 90.00%  | 85.30% | 0.29 | 2.94E-04 |
| NR4A3    | Mast cell | 40.80%  | 24.90% | 0.38 | 3.04E-04 |
| SLC43A3  | Mast cell | 34.20%  | 26.20% | 0.29 | 3.09E-04 |
| SLC25A5  | Mast cell | 84.20%  | 80.90% | 0.30 | 3.80E-04 |
| CCL4     | Mast cell | 53.30%  | 34.60% | 0.86 | 7.65E-04 |
| COX7C    | Mast cell | 98.30%  | 96.20% | 0.26 | 8.31E-04 |
| DNAJA1   | Mast cell | 94.20%  | 90.70% | 0.41 | 8.81E-04 |
| PTTG1    | Mast cell | 41.70%  | 25.80% | 0.32 | 9.14E-04 |
| GPX1     | Mast cell | 89.20%  | 83.90% | 0.39 | 9.19E-04 |
| ITM2A    | Mast cell | 45.80%  | 23.30% | 0.28 | 9.26E-04 |
| C1orf162 | Mast cell | 26.70%  | 8.20%  | 0.31 | 1.16E-03 |
| PPP1R15B | Mast cell | 40.80%  | 29.60% | 0.27 | 1.18E-03 |
| RPS21    | Mast cell | 100.00% | 98.60% | 0.26 | 1.21E-03 |
| CD84     | Mast cell | 21.70%  | 5.70%  | 0.28 | 1.69E-03 |
| ABCA1    | Mast cell | 37.50%  | 18.00% | 0.32 | 1.85E-03 |
| THAP2    | Mast cell | 25.00%  | 18.20% | 0.28 | 1.90E-03 |
| EIF4E    | Mast cell | 57.50%  | 61.20% | 0.31 | 2.15E-03 |
| CAPZA1   | Mast cell | 46.70%  | 38.30% | 0.26 | 2.51E-03 |
| MED21    | Mast cell | 45.80%  | 32.00% | 0.25 | 2.54E-03 |
| BLOC1S2  | Mast cell | 56.70%  | 50.40% | 0.25 | 2.69E-03 |

|          |           |         |        |      |           |
|----------|-----------|---------|--------|------|-----------|
| NFE2L2   | Mast cell | 87.50%  | 78.80% | 0.36 | 3.15E-03  |
| ATP6V0B  | Mast cell | 80.00%  | 76.10% | 0.26 | 4.63E-03  |
| EHD1     | Mast cell | 40.80%  | 36.30% | 0.27 | 5.03E-03  |
| USP15    | Mast cell | 42.50%  | 28.30% | 0.26 | 1.52E-02  |
| LIF      | Mast cell | 33.30%  | 14.00% | 0.32 | 1.79E-02  |
| NINJ1    | Mast cell | 53.30%  | 37.90% | 0.35 | 2.90E-02  |
| CKS2     | Mast cell | 57.50%  | 53.90% | 0.30 | 4.14E-02  |
| SLC3A2   | Mast cell | 83.30%  | 75.80% | 0.35 | 4.56E-02  |
| HNRNPK   | Mast cell | 92.50%  | 89.90% | 0.25 | 5.61E-02  |
| MYL12A   | Mast cell | 96.70%  | 90.90% | 0.26 | 6.10E-02  |
| TWISTNB  | Mast cell | 60.80%  | 47.30% | 0.44 | 6.50E-02  |
| MIR24-2  | Mast cell | 40.80%  | 31.40% | 0.31 | 7.08E-02  |
| NFKBIZ   | Mast cell | 67.50%  | 60.50% | 0.28 | 7.63E-02  |
| AP1S2    | Mast cell | 55.80%  | 40.00% | 0.31 | 8.45E-02  |
| SWAP70   | Mast cell | 41.70%  | 25.60% | 0.26 | 3.91E-01  |
| HSP90AB1 | Mast cell | 100.00% | 98.50% | 0.26 | 5.27E-01  |
| TSPYL2   | Mast cell | 37.50%  | 26.90% | 0.26 | 5.34E-01  |
| MTHFD2   | Mast cell | 60.00%  | 48.10% | 0.29 | 1.00E+00  |
| KLF6     | Mast cell | 90.80%  | 80.20% | 0.30 | 1.00E+00  |
| LXN      | Mast cell | 30.80%  | 19.10% | 0.25 | 1.00E+00  |
| BTG2     | Mast cell | 65.80%  | 58.90% | 0.32 | 1.00E+00  |
| PHLDA2   | Mast cell | 65.80%  | 55.50% | 0.31 | 1.00E+00  |
| DUSP4    | Mast cell | 20.00%  | 16.80% | 0.27 | 1.00E+00  |
| TSC22D1  | Mast cell | 51.70%  | 53.70% | 0.27 | 1.00E+00  |
| HIST1H4C | ProIC     | 94.20%  | 43.10% | 2.43 | 1.08E-177 |
| PTTG1    | ProIC     | 96.20%  | 25.60% | 1.65 | 6.07E-119 |
| CENPF    | ProIC     | 96.20%  | 2.50%  | 1.84 | 8.95E-118 |
| CDKN3    | ProIC     | 88.50%  | 6.60%  | 1.45 | 5.62E-110 |
| STMN1    | ProIC     | 98.10%  | 16.40% | 2.09 | 3.95E-107 |
| UBE2C    | ProIC     | 92.30%  | 0.80%  | 1.48 | 4.96E-102 |
| MKI67    | ProIC     | 94.20%  | 0.40%  | 1.22 | 1.77E-101 |
| TOP2A    | ProIC     | 94.20%  | 1.10%  | 1.51 | 7.59E-99  |
| BIRC5    | ProIC     | 92.30%  | 0.90%  | 1.30 | 1.83E-98  |
| TPX2     | ProIC     | 90.40%  | 0.50%  | 1.00 | 5.75E-95  |
| NUSAP1   | ProIC     | 94.20%  | 3.60%  | 1.43 | 3.55E-92  |
| TK1      | ProIC     | 88.50%  | 1.20%  | 1.36 | 9.99E-87  |
| HMG2     | ProIC     | 100.00% | 73.40% | 1.43 | 1.41E-86  |
| TUBB     | ProIC     | 100.00% | 83.20% | 1.56 | 3.56E-86  |
| PRC1     | ProIC     | 90.40%  | 2.10%  | 1.20 | 3.42E-84  |
| KIAA0101 | ProIC     | 84.60%  | 1.80%  | 1.42 | 1.57E-83  |
| RRM2     | ProIC     | 76.90%  | 0.20%  | 1.01 | 4.38E-83  |

|          |       |         |        |      |          |
|----------|-------|---------|--------|------|----------|
| CDK1     | ProIC | 86.50%  | 1.40%  | 1.25 | 8.74E-79 |
| TUBA1B   | ProIC | 100.00% | 96.20% | 1.64 | 2.32E-78 |
| SMC4     | ProIC | 98.10%  | 25.80% | 1.34 | 6.57E-76 |
| CCNA2    | ProIC | 78.80%  | 0.40%  | 0.71 | 1.33E-75 |
| ANLN     | ProIC | 76.90%  | 0.40%  | 0.74 | 1.80E-74 |
| ASPM     | ProIC | 76.90%  | 0.60%  | 1.00 | 4.55E-74 |
| GTSE1    | ProIC | 78.80%  | 1.00%  | 0.89 | 9.38E-74 |
| FAM64A   | ProIC | 69.20%  | 0.20%  | 0.79 | 8.58E-72 |
| CENPW    | ProIC | 84.60%  | 3.90%  | 1.13 | 1.12E-71 |
| FOXM1    | ProIC | 76.90%  | 0.50%  | 0.65 | 2.00E-71 |
| TYMS     | ProIC | 76.90%  | 1.10%  | 1.09 | 2.17E-70 |
| KIF23    | ProIC | 78.80%  | 0.60%  | 0.61 | 1.66E-69 |
| CENPM    | ProIC | 73.10%  | 0.30%  | 0.56 | 3.78E-69 |
| CCNB2    | ProIC | 71.20%  | 0.40%  | 0.74 | 9.76E-69 |
| CKAP2L   | ProIC | 73.10%  | 0.40%  | 0.62 | 3.12E-68 |
| DIAPH3   | ProIC | 71.20%  | 0.40%  | 0.60 | 4.33E-68 |
| DEPDC1   | ProIC | 65.40%  | 0.20%  | 0.55 | 6.95E-66 |
| CEP55    | ProIC | 69.20%  | 0.30%  | 0.59 | 1.25E-65 |
| PBK      | ProIC | 76.90%  | 1.50%  | 0.89 | 5.50E-65 |
| CDCA5    | ProIC | 71.20%  | 0.50%  | 0.57 | 1.79E-64 |
| SPC25    | ProIC | 61.50%  | 0.10%  | 0.59 | 4.47E-64 |
| CDCA3    | ProIC | 69.20%  | 0.40%  | 0.66 | 8.38E-64 |
| UBE2T    | ProIC | 76.90%  | 3.70%  | 0.94 | 1.31E-63 |
| AURKB    | ProIC | 65.40%  | 0.20%  | 0.62 | 3.03E-63 |
| CKS1B    | ProIC | 96.20%  | 47.50% | 1.11 | 1.21E-62 |
| CENPN    | ProIC | 88.50%  | 5.50%  | 0.92 | 1.25E-61 |
| SHCBP1   | ProIC | 69.20%  | 0.50%  | 0.50 | 4.77E-61 |
| SGOL1    | ProIC | 61.50%  | 0.20%  | 0.48 | 2.21E-60 |
| HMMR     | ProIC | 65.40%  | 0.30%  | 0.62 | 4.31E-60 |
| ZWINT    | ProIC | 80.80%  | 2.10%  | 0.76 | 6.36E-59 |
| TMEM106C | ProIC | 88.50%  | 31.00% | 1.03 | 1.57E-58 |
| CENPU    | ProIC | 78.80%  | 1.80%  | 0.88 | 7.79E-58 |
| CASC5    | ProIC | 61.50%  | 0.30%  | 0.43 | 2.02E-57 |
| TROAP    | ProIC | 59.60%  | 0.30%  | 0.47 | 1.99E-55 |
| NCAPG    | ProIC | 57.70%  | 0.20%  | 0.44 | 7.30E-55 |
| APOBEC3B | ProIC | 61.50%  | 0.30%  | 0.57 | 1.25E-54 |
| MELK     | ProIC | 61.50%  | 0.30%  | 0.43 | 1.69E-54 |
| PKMYT1   | ProIC | 55.80%  | 0.10%  | 0.41 | 1.74E-54 |
| HMGB2    | ProIC | 98.10%  | 46.90% | 1.27 | 8.55E-54 |
| DLGAP5   | ProIC | 50.00%  | 0.00%  | 0.40 | 9.64E-54 |
| NUF2     | ProIC | 59.60%  | 0.40%  | 0.64 | 3.72E-53 |



|           |       |         |        |      |          |
|-----------|-------|---------|--------|------|----------|
| RHEB      | ProIC | 96.20%  | 70.90% | 1.04 | 2.53E-51 |
| SKA3      | ProIC | 53.80%  | 0.20%  | 0.38 | 1.09E-49 |
| RACGAP1   | ProIC | 80.80%  | 2.70%  | 0.58 | 5.82E-49 |
| TUBA1C    | ProIC | 100.00% | 67.50% | 1.18 | 1.17E-48 |
| ARHGAP11A | ProIC | 63.50%  | 0.70%  | 0.49 | 1.71E-48 |
| ESCO2     | ProIC | 65.40%  | 1.00%  | 0.51 | 3.15E-47 |
| CDC20     | ProIC | 69.20%  | 1.90%  | 0.82 | 1.47E-46 |
| CDKN2D    | ProIC | 82.70%  | 8.40%  | 0.87 | 4.56E-45 |
| PRR11     | ProIC | 65.40%  | 1.30%  | 0.65 | 2.48E-44 |
| KIF20A    | ProIC | 46.20%  | 0.10%  | 0.32 | 3.08E-44 |
| ATAD2     | ProIC | 76.90%  | 5.10%  | 0.78 | 6.13E-44 |
| LGALS1    | ProIC | 100.00% | 97.30% | 1.70 | 7.07E-44 |
| PLK1      | ProIC | 51.90%  | 0.40%  | 0.54 | 7.90E-44 |
| HMGB1     | ProIC | 100.00% | 96.80% | 1.06 | 3.04E-43 |
| MXD3      | ProIC | 63.50%  | 1.70%  | 0.59 | 2.91E-42 |
| POC1A     | ProIC | 59.60%  | 1.00%  | 0.35 | 1.66E-41 |
| MAD2L1    | ProIC | 78.80%  | 6.30%  | 0.72 | 6.36E-41 |
| TCF19     | ProIC | 69.20%  | 2.80%  | 0.61 | 8.50E-40 |
| DTYMK     | ProIC | 86.50%  | 21.70% | 0.88 | 1.17E-39 |
| BUB1      | ProIC | 40.40%  | 0.10%  | 0.32 | 1.87E-39 |
| KIF20B    | ProIC | 82.70%  | 6.20%  | 0.80 | 3.52E-39 |
| HJURP     | ProIC | 40.40%  | 0.10%  | 0.30 | 5.06E-39 |
| MYBL1     | ProIC | 59.60%  | 1.40%  | 0.38 | 5.21E-39 |
| H2AFZ     | ProIC | 100.00% | 91.10% | 1.16 | 1.23E-38 |
| CKAP2     | ProIC | 78.80%  | 5.80%  | 0.80 | 1.72E-38 |
| MYBL2     | ProIC | 42.30%  | 0.10%  | 0.36 | 1.77E-38 |
| HMGB3     | ProIC | 69.20%  | 4.30%  | 0.79 | 6.56E-38 |
| NEK2      | ProIC | 42.30%  | 0.20%  | 0.34 | 9.70E-38 |
| TACC3     | ProIC | 61.50%  | 1.70%  | 0.48 | 2.59E-37 |
| PCNA      | ProIC | 75.00%  | 30.70% | 0.87 | 5.20E-37 |
| RPL39L    | ProIC | 78.80%  | 13.10% | 0.80 | 6.41E-37 |
| IQGAP3    | ProIC | 44.20%  | 0.30%  | 0.31 | 1.56E-36 |
| C1QL1     | ProIC | 46.20%  | 0.40%  | 0.28 | 6.47E-36 |
| COX8A     | ProIC | 100.00% | 86.30% | 0.85 | 1.18E-35 |
| DEK       | ProIC | 98.10%  | 76.20% | 0.94 | 1.98E-35 |
| KIF2C     | ProIC | 42.30%  | 0.20%  | 0.29 | 6.04E-35 |
| CENPH     | ProIC | 75.00%  | 4.50%  | 0.54 | 7.57E-35 |
| CCNB1     | ProIC | 65.40%  | 4.20%  | 0.70 | 1.21E-34 |
| LMNB2     | ProIC | 73.10%  | 4.10%  | 0.48 | 1.60E-34 |
| CENPE     | ProIC | 67.30%  | 3.20%  | 0.62 | 5.00E-34 |
| H2AFV     | ProIC | 100.00% | 50.70% | 0.85 | 5.41E-34 |

|          |       |         |        |      |          |
|----------|-------|---------|--------|------|----------|
| ASF1B    | ProIC | 57.70%  | 1.50%  | 0.48 | 9.33E-34 |
| RAD51AP1 | ProIC | 51.90%  | 1.00%  | 0.35 | 1.50E-33 |
| KIF11    | ProIC | 44.20%  | 0.40%  | 0.32 | 1.65E-33 |
| DHFR     | ProIC | 67.30%  | 4.00%  | 0.67 | 3.16E-33 |
| CDC45    | ProIC | 40.40%  | 0.30%  | 0.27 | 6.16E-33 |
| SKA2     | ProIC | 78.80%  | 16.50% | 0.84 | 7.90E-33 |
| CD70     | ProIC | 61.50%  | 17.00% | 1.28 | 1.06E-32 |
| PSMC3IP  | ProIC | 61.50%  | 3.40%  | 0.63 | 2.50E-32 |
| KIF14    | ProIC | 46.20%  | 0.60%  | 0.35 | 3.10E-32 |
| PHF19    | ProIC | 80.80%  | 9.80%  | 0.69 | 5.76E-32 |
| GGH      | ProIC | 82.70%  | 15.30% | 0.81 | 1.29E-31 |
| CENPA    | ProIC | 40.40%  | 0.40%  | 0.38 | 1.49E-31 |
| KIFC1    | ProIC | 46.20%  | 0.70%  | 0.26 | 1.57E-31 |
| CLSPN    | ProIC | 55.80%  | 1.60%  | 0.50 | 1.63E-31 |
| ZMYND10  | ProIC | 48.10%  | 1.10%  | 0.45 | 2.57E-31 |
| MZT2B    | ProIC | 96.20%  | 58.10% | 0.84 | 5.85E-31 |
| PFN1     | ProIC | 100.00% | 96.00% | 0.88 | 1.22E-30 |
| DNMT1    | ProIC | 92.30%  | 19.30% | 0.74 | 1.70E-29 |
| NUCKS1   | ProIC | 100.00% | 86.70% | 0.94 | 4.17E-29 |
| GAPDH    | ProIC | 100.00% | 99.30% | 1.02 | 4.22E-29 |
| CCDC34   | ProIC | 76.90%  | 11.50% | 0.74 | 8.08E-29 |
| KIF4A    | ProIC | 48.10%  | 1.20%  | 0.36 | 3.52E-28 |
| ZNF367   | ProIC | 42.30%  | 0.60%  | 0.36 | 4.79E-28 |
| FANCI    | ProIC | 46.20%  | 0.90%  | 0.34 | 7.90E-28 |
| ECT2     | ProIC | 59.60%  | 3.00%  | 0.41 | 2.94E-27 |
| RNASEH2A | ProIC | 76.90%  | 8.30%  | 0.59 | 3.03E-27 |
| TRIP13   | ProIC | 51.90%  | 1.90%  | 0.32 | 9.43E-27 |
| MND1     | ProIC | 34.60%  | 0.20%  | 0.26 | 1.15E-26 |
| CIT      | ProIC | 48.10%  | 1.40%  | 0.32 | 1.42E-26 |
| USP1     | ProIC | 94.20%  | 33.30% | 0.75 | 1.94E-26 |
| CDCA2    | ProIC | 50.00%  | 1.70%  | 0.31 | 2.05E-26 |
| NCAPH    | ProIC | 38.50%  | 0.40%  | 0.27 | 2.43E-26 |
| ADAM12   | ProIC | 67.30%  | 8.10%  | 0.74 | 5.71E-26 |
| NDC80    | ProIC | 46.20%  | 1.20%  | 0.40 | 1.17E-25 |
| ORC6     | ProIC | 53.80%  | 2.50%  | 0.36 | 2.98E-25 |
| DUT      | ProIC | 84.60%  | 63.50% | 0.84 | 3.12E-25 |
| SIVA1    | ProIC | 96.20%  | 69.00% | 0.72 | 1.07E-23 |
| MZT1     | ProIC | 84.60%  | 22.40% | 0.71 | 1.33E-23 |
| CDC45    | ProIC | 30.80%  | 0.20%  | 0.25 | 1.39E-23 |
| KNSTRN   | ProIC | 50.00%  | 2.20%  | 0.47 | 3.21E-23 |
| NCAPG2   | ProIC | 51.90%  | 2.50%  | 0.34 | 3.31E-23 |

|          |       |         |        |      |          |
|----------|-------|---------|--------|------|----------|
| TMPO     | ProIC | 71.20%  | 8.30%  | 0.59 | 4.39E-23 |
| TUBB6    | ProIC | 96.20%  | 55.50% | 0.78 | 5.63E-23 |
| AURKA    | ProIC | 48.10%  | 1.90%  | 0.42 | 1.79E-22 |
| EZH2     | ProIC | 78.80%  | 12.50% | 0.59 | 2.05E-22 |
| SGOL2    | ProIC | 55.80%  | 4.10%  | 0.53 | 2.25E-22 |
| FAM111B  | ProIC | 34.60%  | 0.50%  | 0.43 | 2.38E-22 |
| RANBP1   | ProIC | 92.30%  | 58.70% | 0.70 | 4.29E-22 |
| DRAP1    | ProIC | 92.30%  | 71.50% | 0.73 | 8.02E-22 |
| CENPK    | ProIC | 50.00%  | 2.40%  | 0.37 | 8.98E-22 |
| DNAJC9   | ProIC | 80.80%  | 14.30% | 0.60 | 1.39E-21 |
| FEN1     | ProIC | 59.60%  | 5.80%  | 0.50 | 1.81E-21 |
| STRA13   | ProIC | 90.40%  | 46.50% | 0.71 | 3.86E-21 |
| WHSC1    | ProIC | 53.80%  | 3.80%  | 0.33 | 1.64E-20 |
| GPC1     | ProIC | 65.40%  | 7.20%  | 0.40 | 1.77E-20 |
| ZWILCH   | ProIC | 61.50%  | 6.10%  | 0.35 | 1.97E-20 |
| WDR34    | ProIC | 80.80%  | 22.60% | 0.65 | 2.39E-20 |
| RAD51    | ProIC | 34.60%  | 0.60%  | 0.26 | 2.62E-20 |
| HN1      | ProIC | 86.50%  | 35.40% | 0.72 | 3.49E-20 |
| GAS2L3   | ProIC | 50.00%  | 3.30%  | 0.37 | 4.24E-20 |
| GINS2    | ProIC | 38.50%  | 1.10%  | 0.38 | 5.10E-20 |
| SMS      | ProIC | 92.30%  | 38.10% | 0.78 | 1.07E-19 |
| SMC2     | ProIC | 73.10%  | 14.50% | 0.67 | 1.12E-19 |
| NRM      | ProIC | 71.20%  | 10.70% | 0.44 | 2.17E-19 |
| LSM4     | ProIC | 94.20%  | 42.10% | 0.68 | 4.87E-19 |
| ANP32B   | ProIC | 94.20%  | 61.30% | 0.73 | 6.88E-19 |
| IL11     | ProIC | 57.70%  | 7.00%  | 0.84 | 1.18E-18 |
| TIMELESS | ProIC | 40.40%  | 1.50%  | 0.27 | 1.29E-18 |
| CKS2     | ProIC | 98.10%  | 53.70% | 0.82 | 1.54E-18 |
| MAD2L2   | ProIC | 78.80%  | 27.50% | 0.65 | 1.70E-18 |
| HELLS    | ProIC | 55.80%  | 5.60%  | 0.52 | 2.82E-18 |
| RAN      | ProIC | 98.10%  | 86.60% | 0.68 | 3.21E-18 |
| SPAG5    | ProIC | 42.30%  | 2.00%  | 0.25 | 3.25E-18 |
| PTMS     | ProIC | 98.10%  | 52.00% | 0.70 | 5.72E-18 |
| MIS18BP1 | ProIC | 80.80%  | 18.40% | 0.38 | 9.39E-18 |
| TAGLN2   | ProIC | 100.00% | 96.10% | 0.67 | 1.60E-17 |
| CENPB    | ProIC | 63.50%  | 9.20%  | 0.30 | 1.61E-17 |
| CEP89    | ProIC | 61.50%  | 10.60% | 0.25 | 2.06E-17 |
| RHNO1    | ProIC | 53.80%  | 5.50%  | 0.29 | 2.86E-17 |
| POLR3K   | ProIC | 71.20%  | 15.30% | 0.27 | 4.03E-17 |
| NT5DC2   | ProIC | 67.30%  | 12.40% | 0.28 | 5.84E-17 |
| MCM7     | ProIC | 65.40%  | 17.30% | 0.56 | 6.69E-17 |

|               |       |         |        |      |          |
|---------------|-------|---------|--------|------|----------|
| LIG1          | ProIC | 42.30%  | 2.50%  | 0.28 | 7.87E-17 |
| MAZ           | ProIC | 88.50%  | 27.10% | 0.58 | 9.00E-17 |
| NCAPD3        | ProIC | 55.80%  | 6.70%  | 0.28 | 1.04E-16 |
| PIN1          | ProIC | 92.30%  | 52.80% | 0.62 | 1.54E-16 |
| ITGB1BP1      | ProIC | 88.50%  | 59.00% | 0.67 | 1.84E-16 |
| IDH2          | ProIC | 78.80%  | 20.10% | 0.55 | 3.57E-16 |
| ANAPC11       | ProIC | 94.20%  | 75.40% | 0.62 | 4.79E-16 |
| TUBG1         | ProIC | 71.20%  | 13.90% | 0.50 | 5.36E-16 |
| FBXO5         | ProIC | 55.80%  | 6.20%  | 0.37 | 7.14E-16 |
| TPGS2         | ProIC | 80.80%  | 24.60% | 0.55 | 1.06E-15 |
| DBI           | ProIC | 100.00% | 83.80% | 0.65 | 1.43E-15 |
| LRR1          | ProIC | 53.80%  | 5.90%  | 0.31 | 1.59E-15 |
| COL6A3        | ProIC | 82.70%  | 73.90% | 0.82 | 3.67E-15 |
| C19orf48      | ProIC | 65.40%  | 10.70% | 0.39 | 4.05E-15 |
| MCM4          | ProIC | 46.20%  | 4.00%  | 0.30 | 4.39E-15 |
| SYNE2         | ProIC | 73.10%  | 16.90% | 0.43 | 9.02E-15 |
| NUDT1         | ProIC | 80.80%  | 29.70% | 0.60 | 9.84E-15 |
| BCL2L12       | ProIC | 71.20%  | 14.30% | 0.44 | 1.54E-14 |
| BRCA2         | ProIC | 42.30%  | 3.40%  | 0.26 | 2.23E-14 |
| LMO7          | ProIC | 50.00%  | 5.30%  | 0.32 | 2.75E-14 |
| XPO1          | ProIC | 75.00%  | 18.30% | 0.34 | 2.96E-14 |
| CSE1L         | ProIC | 61.50%  | 11.10% | 0.30 | 4.13E-14 |
| ANAPC15       | ProIC | 73.10%  | 19.00% | 0.26 | 4.29E-14 |
| SPDL1         | ProIC | 44.20%  | 3.70%  | 0.28 | 4.70E-14 |
| REEP4         | ProIC | 50.00%  | 5.60%  | 0.29 | 4.79E-14 |
| FAM101B       | ProIC | 55.80%  | 7.80%  | 0.30 | 4.93E-14 |
| LOXL2         | ProIC | 75.00%  | 19.00% | 0.72 | 5.91E-14 |
| HMGN1         | ProIC | 96.20%  | 60.70% | 0.64 | 6.28E-14 |
| RP11-620J15.3 | ProIC | 59.60%  | 9.40%  | 0.32 | 6.73E-14 |
| PRKCDDBP      | ProIC | 92.30%  | 77.80% | 0.77 | 1.67E-13 |
| DSN1          | ProIC | 50.00%  | 6.30%  | 0.25 | 1.87E-13 |
| BOLA3         | ProIC | 84.60%  | 34.40% | 0.59 | 2.00E-13 |
| SAE1          | ProIC | 73.10%  | 18.90% | 0.52 | 2.09E-13 |
| VANGL1        | ProIC | 51.90%  | 6.80%  | 0.27 | 3.42E-13 |
| CLN6          | ProIC | 55.80%  | 8.10%  | 0.33 | 4.61E-13 |
| CLIC1         | ProIC | 100.00% | 94.80% | 0.64 | 7.02E-13 |
| CFL1          | ProIC | 100.00% | 98.40% | 0.56 | 7.62E-13 |
| COMMD4        | ProIC | 90.40%  | 32.40% | 0.45 | 1.86E-12 |
| PLP2          | ProIC | 98.10%  | 79.40% | 0.77 | 2.36E-12 |
| EIF4EBP1      | ProIC | 78.80%  | 25.50% | 0.49 | 2.40E-12 |
| ACTN4         | ProIC | 86.50%  | 51.50% | 0.65 | 3.20E-12 |

|           |       |         |        |      |          |
|-----------|-------|---------|--------|------|----------|
| ANP32E    | ProIC | 90.40%  | 39.20% | 0.59 | 3.26E-12 |
| ATXN2L    | ProIC | 71.20%  | 19.00% | 0.32 | 3.59E-12 |
| HINT1     | ProIC | 98.10%  | 90.70% | 0.55 | 3.69E-12 |
| COL6A1    | ProIC | 84.60%  | 81.70% | 0.80 | 3.88E-12 |
| BCL7C     | ProIC | 76.90%  | 21.60% | 0.45 | 4.19E-12 |
| CD97      | ProIC | 84.60%  | 34.10% | 0.59 | 4.44E-12 |
| FAM83D    | ProIC | 38.50%  | 2.90%  | 0.26 | 4.60E-12 |
| ACOT7     | ProIC | 73.10%  | 17.90% | 0.48 | 5.34E-12 |
| ITGA5     | ProIC | 80.80%  | 36.00% | 0.68 | 6.03E-12 |
| APITD1    | ProIC | 51.90%  | 7.30%  | 0.27 | 6.17E-12 |
| HIST1H1E  | ProIC | 38.50%  | 2.90%  | 0.27 | 7.66E-12 |
| CDC25B    | ProIC | 50.00%  | 7.40%  | 0.26 | 8.15E-12 |
| TPI1      | ProIC | 98.10%  | 93.80% | 0.59 | 1.06E-11 |
| ZDHHC12   | ProIC | 69.20%  | 16.40% | 0.36 | 1.08E-11 |
| TPM4      | ProIC | 96.20%  | 80.60% | 0.71 | 1.44E-11 |
| CBX5      | ProIC | 88.50%  | 37.00% | 0.55 | 1.51E-11 |
| GAS2L1    | ProIC | 67.30%  | 15.60% | 0.33 | 2.20E-11 |
| RAD21     | ProIC | 90.40%  | 39.50% | 0.55 | 2.26E-11 |
| EMC9      | ProIC | 57.70%  | 11.50% | 0.44 | 2.32E-11 |
| ARPC2     | ProIC | 98.10%  | 91.70% | 0.55 | 2.56E-11 |
| PRRC2A    | ProIC | 75.00%  | 22.20% | 0.30 | 2.72E-11 |
| FADS1     | ProIC | 65.40%  | 14.70% | 0.36 | 4.54E-11 |
| NRP2      | ProIC | 82.70%  | 33.50% | 0.67 | 4.56E-11 |
| KIF5B     | ProIC | 94.20%  | 71.00% | 0.59 | 4.66E-11 |
| KIAA1524  | ProIC | 40.40%  | 3.90%  | 0.26 | 5.01E-11 |
| NUDT15    | ProIC | 61.50%  | 13.80% | 0.26 | 5.09E-11 |
| TNFRSF12A | ProIC | 94.20%  | 63.90% | 0.91 | 6.82E-11 |
| PDS5A     | ProIC | 75.00%  | 21.90% | 0.32 | 7.05E-11 |
| C11orf24  | ProIC | 73.10%  | 21.50% | 0.31 | 7.71E-11 |
| PMM1      | ProIC | 78.80%  | 25.10% | 0.32 | 8.44E-11 |
| PHGDH     | ProIC | 53.80%  | 9.60%  | 0.29 | 9.78E-11 |
| ATAD5     | ProIC | 32.70%  | 2.00%  | 0.26 | 9.93E-11 |
| RCC1      | ProIC | 67.30%  | 18.10% | 0.27 | 1.07E-10 |
| CCDC88A   | ProIC | 82.70%  | 28.60% | 0.55 | 1.20E-10 |
| CDCA4     | ProIC | 48.10%  | 6.80%  | 0.37 | 1.36E-10 |
| SNRPG     | ProIC | 100.00% | 80.30% | 0.52 | 1.45E-10 |
| HIST1H1A  | ProIC | 25.00%  | 1.20%  | 0.30 | 1.52E-10 |
| LINC00152 | ProIC | 98.10%  | 48.00% | 0.50 | 1.53E-10 |
| CBFB      | ProIC | 63.50%  | 15.90% | 0.26 | 2.18E-10 |
| CKLF      | ProIC | 90.40%  | 36.80% | 0.48 | 2.76E-10 |
| IKBIP     | ProIC | 80.80%  | 42.50% | 0.57 | 3.95E-10 |

|          |       |         |        |      |          |
|----------|-------|---------|--------|------|----------|
| RPA3     | ProIC | 86.50%  | 37.10% | 0.49 | 3.99E-10 |
| MZT2A    | ProIC | 80.80%  | 27.70% | 0.47 | 4.10E-10 |
| C12orf75 | ProIC | 63.50%  | 16.90% | 0.65 | 4.61E-10 |
| NAV2     | ProIC | 46.20%  | 6.40%  | 0.27 | 5.29E-10 |
| BANF1    | ProIC | 90.40%  | 65.40% | 0.55 | 5.40E-10 |
| HDGF     | ProIC | 80.80%  | 28.20% | 0.46 | 6.17E-10 |
| COL5A1   | ProIC | 82.70%  | 39.00% | 0.79 | 9.07E-10 |
| SMC1A    | ProIC | 78.80%  | 26.40% | 0.49 | 9.20E-10 |
| SNRPB    | ProIC | 92.30%  | 76.10% | 0.53 | 1.36E-09 |
| COX20    | ProIC | 90.40%  | 50.60% | 0.55 | 1.43E-09 |
| SLAIN2   | ProIC | 76.90%  | 26.80% | 0.27 | 1.93E-09 |
| COL15A1  | ProIC | 76.90%  | 24.90% | 0.65 | 2.47E-09 |
| HP1BP3   | ProIC | 98.10%  | 61.80% | 0.51 | 2.50E-09 |
| BARD1    | ProIC | 40.40%  | 4.80%  | 0.26 | 3.30E-09 |
| NCAPH2   | ProIC | 65.40%  | 17.00% | 0.32 | 3.35E-09 |
| CALM2    | ProIC | 100.00% | 97.90% | 0.59 | 3.55E-09 |
| DCK      | ProIC | 57.70%  | 12.70% | 0.31 | 3.88E-09 |
| PSIP1    | ProIC | 65.40%  | 18.20% | 0.28 | 4.48E-09 |
| MNS1     | ProIC | 42.30%  | 5.30%  | 0.29 | 5.06E-09 |
| MAP1B    | ProIC | 73.10%  | 27.60% | 0.81 | 5.14E-09 |
| CSPG4    | ProIC | 73.10%  | 22.60% | 0.49 | 5.44E-09 |
| RRM1     | ProIC | 63.50%  | 15.80% | 0.42 | 5.47E-09 |
| PGAM1    | ProIC | 98.10%  | 72.80% | 0.61 | 6.41E-09 |
| PTMA     | ProIC | 100.00% | 99.90% | 0.50 | 8.72E-09 |
| RASSF1   | ProIC | 78.80%  | 29.60% | 0.47 | 8.78E-09 |
| COL5A3   | ProIC | 38.50%  | 6.10%  | 0.50 | 8.79E-09 |
| NRAS     | ProIC | 61.50%  | 16.10% | 0.26 | 1.00E-08 |
| COL5A2   | ProIC | 82.70%  | 52.80% | 0.78 | 1.14E-08 |
| NDUFAF3  | ProIC | 94.20%  | 65.40% | 0.51 | 1.33E-08 |
| PPIA     | ProIC | 100.00% | 98.00% | 0.46 | 1.55E-08 |
| COP3     | ProIC | 84.60%  | 34.80% | 0.28 | 1.78E-08 |
| AP2S1    | ProIC | 96.20%  | 67.70% | 0.53 | 1.85E-08 |
| MIIP     | ProIC | 61.50%  | 15.90% | 0.29 | 2.05E-08 |
| ENO1     | ProIC | 100.00% | 95.60% | 0.61 | 2.08E-08 |
| CDK5RAP2 | ProIC | 57.70%  | 14.00% | 0.28 | 2.55E-08 |
| COL1A1   | ProIC | 88.50%  | 69.10% | 1.35 | 2.78E-08 |
| AURKAIP1 | ProIC | 92.30%  | 58.00% | 0.49 | 2.95E-08 |
| CARHSP1  | ProIC | 82.70%  | 42.00% | 0.57 | 3.24E-08 |
| SLC25A5  | ProIC | 98.10%  | 80.80% | 0.54 | 3.52E-08 |
| RNF26    | ProIC | 53.80%  | 11.20% | 0.31 | 6.34E-08 |
| DCXR     | ProIC | 75.00%  | 26.20% | 0.44 | 6.94E-08 |

|          |       |         |         |      |          |
|----------|-------|---------|---------|------|----------|
| KIF22    | ProIC | 78.80%  | 31.50%  | 0.47 | 8.38E-08 |
| WSB2     | ProIC | 59.60%  | 15.30%  | 0.28 | 8.59E-08 |
| DAG1     | ProIC | 69.20%  | 21.60%  | 0.31 | 1.29E-07 |
| SUN2     | ProIC | 78.80%  | 29.20%  | 0.35 | 1.39E-07 |
| ICMT     | ProIC | 57.70%  | 14.60%  | 0.28 | 1.42E-07 |
| ITGB3BP  | ProIC | 65.40%  | 20.40%  | 0.26 | 1.49E-07 |
| PARP1    | ProIC | 73.10%  | 29.30%  | 0.37 | 1.57E-07 |
| RUVBL2   | ProIC | 75.00%  | 27.90%  | 0.42 | 1.74E-07 |
| H2AFY    | ProIC | 88.50%  | 44.30%  | 0.47 | 1.76E-07 |
| RPSA     | ProIC | 100.00% | 97.70%  | 0.48 | 1.77E-07 |
| MCM5     | ProIC | 42.30%  | 7.90%   | 0.41 | 1.81E-07 |
| ST3GAL4  | ProIC | 61.50%  | 17.50%  | 0.31 | 1.99E-07 |
| POLD2    | ProIC | 86.50%  | 41.00%  | 0.46 | 2.02E-07 |
| DDX39A   | ProIC | 76.90%  | 32.50%  | 0.44 | 2.12E-07 |
| GNB1     | ProIC | 90.40%  | 43.60%  | 0.43 | 2.27E-07 |
| DIAPH1   | ProIC | 82.70%  | 33.40%  | 0.35 | 2.71E-07 |
| AKT1     | ProIC | 59.60%  | 16.00%  | 0.33 | 2.80E-07 |
| LSM5     | ProIC | 94.20%  | 55.40%  | 0.45 | 2.80E-07 |
| NAP1L1   | ProIC | 98.10%  | 87.80%  | 0.48 | 2.87E-07 |
| CEBPG    | ProIC | 78.80%  | 30.40%  | 0.33 | 3.26E-07 |
| TMEM18   | ProIC | 75.00%  | 27.40%  | 0.30 | 3.37E-07 |
| CBX1     | ProIC | 80.80%  | 31.70%  | 0.38 | 3.94E-07 |
| TPM3     | ProIC | 98.10%  | 72.50%  | 0.54 | 4.12E-07 |
| MYH9     | ProIC | 88.50%  | 43.50%  | 0.46 | 4.19E-07 |
| TOR1A    | ProIC | 71.20%  | 25.30%  | 0.26 | 4.23E-07 |
| CORO1C   | ProIC | 76.90%  | 29.30%  | 0.34 | 4.46E-07 |
| VIM      | ProIC | 100.00% | 100.00% | 0.55 | 4.64E-07 |
| FAM111A  | ProIC | 48.10%  | 10.90%  | 0.40 | 4.97E-07 |
| RUSC1    | ProIC | 59.60%  | 16.90%  | 0.28 | 5.33E-07 |
| RFC2     | ProIC | 53.80%  | 12.50%  | 0.29 | 6.61E-07 |
| GMNN     | ProIC | 55.80%  | 15.40%  | 0.42 | 7.49E-07 |
| C9orf142 | ProIC | 76.90%  | 28.80%  | 0.37 | 7.50E-07 |
| BAZ1B    | ProIC | 71.20%  | 26.90%  | 0.25 | 8.12E-07 |
| PTP4A2   | ProIC | 92.30%  | 46.20%  | 0.31 | 8.60E-07 |
| NUCB2    | ProIC | 92.30%  | 69.00%  | 0.59 | 8.69E-07 |
| MRPL37   | ProIC | 75.00%  | 27.20%  | 0.32 | 8.75E-07 |
| EXOSC8   | ProIC | 73.10%  | 25.70%  | 0.33 | 9.78E-07 |
| CCP110   | ProIC | 44.20%  | 8.30%   | 0.27 | 9.82E-07 |
| HINT2    | ProIC | 88.50%  | 42.30%  | 0.39 | 1.14E-06 |
| NIPA2    | ProIC | 71.20%  | 24.60%  | 0.31 | 1.19E-06 |
| GPSM2    | ProIC | 63.50%  | 20.40%  | 0.25 | 1.27E-06 |

|         |       |         |        |      |          |
|---------|-------|---------|--------|------|----------|
| RAD23A  | ProIC | 90.40%  | 67.10% | 0.48 | 1.33E-06 |
| GAMT    | ProIC | 57.70%  | 15.50% | 0.32 | 1.38E-06 |
| SPARC   | ProIC | 92.30%  | 83.20% | 0.84 | 1.51E-06 |
| UCP2    | ProIC | 57.70%  | 17.20% | 0.35 | 1.61E-06 |
| UBE2S   | ProIC | 84.60%  | 40.20% | 0.53 | 1.66E-06 |
| UBALD2  | ProIC | 53.80%  | 14.60% | 0.38 | 1.99E-06 |
| LSM2    | ProIC | 84.60%  | 39.60% | 0.31 | 2.18E-06 |
| PPDPF   | ProIC | 96.20%  | 91.10% | 0.49 | 2.36E-06 |
| BUB3    | ProIC | 82.70%  | 40.70% | 0.45 | 2.84E-06 |
| CLEC11A | ProIC | 59.60%  | 19.40% | 0.45 | 2.91E-06 |
| FHL2    | ProIC | 71.20%  | 33.50% | 0.63 | 3.28E-06 |
| PPP1CA  | ProIC | 94.20%  | 56.90% | 0.43 | 3.29E-06 |
| HMGXB4  | ProIC | 69.20%  | 25.30% | 0.26 | 3.54E-06 |
| TEX30   | ProIC | 51.90%  | 12.10% | 0.29 | 3.73E-06 |
| YWHAZ   | ProIC | 100.00% | 74.10% | 0.43 | 3.75E-06 |
| RHOC    | ProIC | 88.50%  | 80.10% | 0.50 | 4.74E-06 |
| COL4A1  | ProIC | 63.50%  | 30.40% | 0.86 | 5.93E-06 |
| KHDRBS1 | ProIC | 76.90%  | 31.10% | 0.35 | 6.83E-06 |
| NUDCD2  | ProIC | 80.80%  | 36.10% | 0.30 | 7.24E-06 |
| FLNA    | ProIC | 94.20%  | 57.70% | 0.49 | 8.36E-06 |
| SNRPD1  | ProIC | 88.50%  | 56.70% | 0.46 | 9.18E-06 |
| CKAP4   | ProIC | 75.00%  | 31.80% | 0.29 | 9.61E-06 |
| ARL6IP4 | ProIC | 98.10%  | 79.80% | 0.45 | 9.66E-06 |
| AGPAT2  | ProIC | 76.90%  | 31.40% | 0.31 | 9.84E-06 |
| BDP1    | ProIC | 82.70%  | 37.90% | 0.27 | 1.02E-05 |
| ACTN1   | ProIC | 86.50%  | 43.10% | 0.42 | 1.06E-05 |
| RABL5   | ProIC | 73.10%  | 28.50% | 0.29 | 1.06E-05 |
| SGCB    | ProIC | 80.80%  | 42.90% | 0.48 | 1.12E-05 |
| CHTOP   | ProIC | 73.10%  | 29.60% | 0.25 | 1.24E-05 |
| SPATS2L | ProIC | 75.00%  | 29.60% | 0.34 | 1.25E-05 |
| TFPI2   | ProIC | 21.20%  | 1.30%  | 0.47 | 1.29E-05 |
| SNF8    | ProIC | 82.70%  | 37.50% | 0.33 | 1.35E-05 |
| CAPZA1  | ProIC | 82.70%  | 38.10% | 0.31 | 1.49E-05 |
| SZRD1   | ProIC | 78.80%  | 35.10% | 0.28 | 1.54E-05 |
| G3BP1   | ProIC | 84.60%  | 44.60% | 0.28 | 1.60E-05 |
| CALM3   | ProIC | 86.50%  | 49.10% | 0.44 | 1.81E-05 |
| MSC     | ProIC | 61.50%  | 20.00% | 0.47 | 1.90E-05 |
| SLC52A2 | ProIC | 76.90%  | 32.90% | 0.26 | 2.06E-05 |
| BTG3    | ProIC | 94.20%  | 54.40% | 0.42 | 2.12E-05 |
| MAP4K4  | ProIC | 57.70%  | 16.80% | 0.33 | 2.44E-05 |
| MRPL51  | ProIC | 92.30%  | 75.50% | 0.43 | 2.56E-05 |



|          |       |         |        |      |          |
|----------|-------|---------|--------|------|----------|
| ELP5     | ProIC | 69.20%  | 26.80% | 0.26 | 2.59E-05 |
| MSN      | ProIC | 96.20%  | 69.80% | 0.47 | 2.94E-05 |
| TGFBI    | ProIC | 92.30%  | 64.90% | 0.72 | 3.09E-05 |
| LOX      | ProIC | 48.10%  | 13.50% | 0.36 | 3.13E-05 |
| RBM17    | ProIC | 84.60%  | 40.90% | 0.29 | 3.60E-05 |
| PRADC1   | ProIC | 67.30%  | 24.50% | 0.28 | 3.86E-05 |
| CSF1     | ProIC | 61.50%  | 28.90% | 0.51 | 3.95E-05 |
| PRKDC    | ProIC | 76.90%  | 33.70% | 0.26 | 4.28E-05 |
| COL3A1   | ProIC | 92.30%  | 75.00% | 0.84 | 4.74E-05 |
| ILF3     | ProIC | 88.50%  | 45.60% | 0.28 | 5.33E-05 |
| CALU     | ProIC | 92.30%  | 76.10% | 0.48 | 5.41E-05 |
| UBA2     | ProIC | 82.70%  | 40.10% | 0.25 | 5.48E-05 |
| COL4A2   | ProIC | 67.30%  | 34.30% | 0.66 | 5.76E-05 |
| GNG5     | ProIC | 100.00% | 81.90% | 0.36 | 5.85E-05 |
| ARPC5    | ProIC | 98.10%  | 74.40% | 0.40 | 6.34E-05 |
| SSRP1    | ProIC | 78.80%  | 35.50% | 0.33 | 6.43E-05 |
| KPNA2    | ProIC | 92.30%  | 52.40% | 0.34 | 6.56E-05 |
| PALLD    | ProIC | 71.20%  | 28.00% | 0.38 | 6.59E-05 |
| TUBB4B   | ProIC | 100.00% | 89.50% | 0.56 | 7.55E-05 |
| ARL6IP1  | ProIC | 82.70%  | 66.10% | 0.49 | 7.81E-05 |
| COX5A    | ProIC | 96.20%  | 66.60% | 0.39 | 7.84E-05 |
| CKAP5    | ProIC | 44.20%  | 9.80%  | 0.26 | 8.00E-05 |
| CD82     | ProIC | 73.10%  | 34.50% | 0.54 | 9.78E-05 |
| RPL26L1  | ProIC | 76.90%  | 34.80% | 0.26 | 9.79E-05 |
| EHD2     | ProIC | 75.00%  | 31.90% | 0.31 | 1.11E-04 |
| WBP11    | ProIC | 80.80%  | 37.30% | 0.31 | 1.12E-04 |
| SMC3     | ProIC | 73.10%  | 38.70% | 0.43 | 1.13E-04 |
| FAM96A   | ProIC | 65.40%  | 25.20% | 0.26 | 1.36E-04 |
| MAPKAPK2 | ProIC | 71.20%  | 29.20% | 0.27 | 1.60E-04 |
| PSME2    | ProIC | 96.20%  | 58.80% | 0.34 | 1.62E-04 |
| NDUFS6   | ProIC | 98.10%  | 71.10% | 0.38 | 1.95E-04 |
| CMC2     | ProIC | 71.20%  | 30.20% | 0.39 | 2.09E-04 |
| ANKRD11  | ProIC | 84.60%  | 43.20% | 0.29 | 2.29E-04 |
| ITGB1    | ProIC | 94.20%  | 86.90% | 0.45 | 2.33E-04 |
| S100A16  | ProIC | 65.40%  | 47.50% | 0.51 | 2.74E-04 |
| CALM1    | ProIC | 100.00% | 96.80% | 0.44 | 2.79E-04 |
| ACTR2    | ProIC | 90.40%  | 51.20% | 0.26 | 2.83E-04 |
| PTN      | ProIC | 59.60%  | 20.30% | 0.46 | 2.91E-04 |
| SUMO3    | ProIC | 94.20%  | 61.00% | 0.39 | 3.08E-04 |
| COL18A1  | ProIC | 46.20%  | 26.60% | 0.58 | 3.22E-04 |
| DCTN3    | ProIC | 84.60%  | 63.70% | 0.42 | 3.33E-04 |

|             |       |         |        |      |          |
|-------------|-------|---------|--------|------|----------|
| LRRC59      | ProIC | 82.70%  | 53.50% | 0.45 | 3.47E-04 |
| PFKL        | ProIC | 78.80%  | 36.90% | 0.29 | 4.04E-04 |
| SNRPF       | ProIC | 98.10%  | 69.20% | 0.36 | 4.15E-04 |
| MRPL27      | ProIC | 82.70%  | 43.80% | 0.39 | 4.20E-04 |
| CRNDE       | ProIC | 59.60%  | 21.50% | 0.26 | 4.37E-04 |
| PLOD1       | ProIC | 75.00%  | 33.90% | 0.26 | 4.59E-04 |
| CACYBP      | ProIC | 82.70%  | 50.10% | 0.40 | 4.71E-04 |
| TXNDC17     | ProIC | 90.40%  | 51.00% | 0.34 | 4.80E-04 |
| YWHAQ       | ProIC | 100.00% | 84.40% | 0.31 | 4.84E-04 |
| ADAM15      | ProIC | 71.20%  | 30.90% | 0.27 | 4.97E-04 |
| EMD         | ProIC | 71.20%  | 31.00% | 0.27 | 5.34E-04 |
| MEA1        | ProIC | 76.90%  | 39.30% | 0.38 | 5.87E-04 |
| LMO4        | ProIC | 82.70%  | 53.60% | 0.48 | 5.99E-04 |
| PLEC        | ProIC | 84.60%  | 44.00% | 0.31 | 6.08E-04 |
| DOK5        | ProIC | 40.40%  | 9.90%  | 0.29 | 6.47E-04 |
| C1QTNF2     | ProIC | 71.20%  | 29.90% | 0.35 | 6.99E-04 |
| RALY        | ProIC | 84.60%  | 45.40% | 0.33 | 8.46E-04 |
| MYO1C       | ProIC | 73.10%  | 32.20% | 0.36 | 8.62E-04 |
| ARPP19      | ProIC | 76.90%  | 36.10% | 0.32 | 8.71E-04 |
| FLOT1       | ProIC | 96.20%  | 61.70% | 0.32 | 9.76E-04 |
| SMTN        | ProIC | 61.50%  | 23.60% | 0.37 | 1.01E-03 |
| RAC1        | ProIC | 92.30%  | 56.00% | 0.34 | 1.10E-03 |
| CEP350      | ProIC | 63.50%  | 25.00% | 0.26 | 1.18E-03 |
| PPM1G       | ProIC | 78.80%  | 39.20% | 0.27 | 1.38E-03 |
| EIF4E2      | ProIC | 76.90%  | 36.40% | 0.27 | 1.49E-03 |
| MRPL18      | ProIC | 86.50%  | 49.30% | 0.26 | 1.62E-03 |
| PRDX3       | ProIC | 88.50%  | 50.10% | 0.26 | 1.63E-03 |
| SYNE1       | ProIC | 75.00%  | 35.00% | 0.37 | 1.66E-03 |
| HMG20B      | ProIC | 75.00%  | 38.20% | 0.38 | 2.14E-03 |
| FIBP        | ProIC | 82.70%  | 44.00% | 0.31 | 2.15E-03 |
| PXDN        | ProIC | 65.40%  | 26.20% | 0.31 | 2.24E-03 |
| BIRC3       | ProIC | 61.50%  | 23.20% | 0.47 | 2.28E-03 |
| EZR         | ProIC | 94.20%  | 59.90% | 0.38 | 2.41E-03 |
| MCM3        | ProIC | 44.20%  | 12.40% | 0.32 | 2.42E-03 |
| NAP1L4      | ProIC | 73.10%  | 33.50% | 0.26 | 2.42E-03 |
| MIR4435-1HG | ProIC | 82.70%  | 43.10% | 0.38 | 3.09E-03 |
| RPS26       | ProIC | 100.00% | 93.70% | 0.36 | 3.34E-03 |
| MRPL52      | ProIC | 88.50%  | 50.90% | 0.26 | 3.35E-03 |
| H3F3A       | ProIC | 100.00% | 98.30% | 0.31 | 4.07E-03 |
| ARPC1B      | ProIC | 98.10%  | 86.50% | 0.41 | 4.15E-03 |
| LMNA        | ProIC | 100.00% | 98.60% | 0.42 | 4.32E-03 |

|         |       |         |        |      |          |
|---------|-------|---------|--------|------|----------|
| RAB32   | ProIC | 73.10%  | 34.50% | 0.26 | 4.44E-03 |
| ADAMTS2 | ProIC | 63.50%  | 26.90% | 0.30 | 4.49E-03 |
| NAA10   | ProIC | 82.70%  | 43.50% | 0.29 | 4.51E-03 |
| UQCR10  | ProIC | 94.20%  | 61.90% | 0.33 | 4.54E-03 |
| PTS     | ProIC | 80.80%  | 41.30% | 0.31 | 4.55E-03 |
| RBX1    | ProIC | 98.10%  | 80.80% | 0.33 | 4.66E-03 |
| CBX3    | ProIC | 88.50%  | 55.50% | 0.39 | 5.27E-03 |
| DGKI    | ProIC | 34.60%  | 7.00%  | 0.33 | 5.92E-03 |
| SCCPDH  | ProIC | 69.20%  | 30.40% | 0.30 | 6.39E-03 |
| CKB     | ProIC | 59.60%  | 25.80% | 0.51 | 7.04E-03 |
| MRPL34  | ProIC | 84.60%  | 47.00% | 0.27 | 7.07E-03 |
| LMF2    | ProIC | 78.80%  | 40.90% | 0.26 | 7.23E-03 |
| KPNB1   | ProIC | 88.50%  | 51.70% | 0.31 | 7.44E-03 |
| RAB13   | ProIC | 94.20%  | 63.20% | 0.35 | 9.52E-03 |
| ARL4A   | ProIC | 84.60%  | 47.30% | 0.38 | 1.01E-02 |
| MYL6    | ProIC | 100.00% | 99.10% | 0.32 | 1.07E-02 |
| CMIP    | ProIC | 57.70%  | 21.60% | 0.28 | 1.15E-02 |
| LIF     | ProIC | 46.20%  | 14.00% | 0.53 | 1.21E-02 |
| RAB31   | ProIC | 88.50%  | 52.80% | 0.34 | 1.23E-02 |
| RPLP1   | ProIC | 100.00% | 99.80% | 0.29 | 1.23E-02 |
| PCBP1   | ProIC | 96.20%  | 65.70% | 0.28 | 1.26E-02 |
| PMVK    | ProIC | 86.50%  | 50.00% | 0.26 | 1.32E-02 |
| CDH13   | ProIC | 65.40%  | 29.40% | 0.26 | 1.34E-02 |
| LSM3    | ProIC | 92.30%  | 62.30% | 0.35 | 1.40E-02 |
| CRIP2   | ProIC | 96.20%  | 75.10% | 0.43 | 1.46E-02 |
| ILVBL   | ProIC | 55.80%  | 22.00% | 0.27 | 1.75E-02 |
| MTCH2   | ProIC | 69.20%  | 32.50% | 0.31 | 1.76E-02 |
| TMSB10  | ProIC | 98.10%  | 98.00% | 0.42 | 2.06E-02 |
| S100A3  | ProIC | 59.60%  | 24.70% | 0.25 | 2.11E-02 |
| HMGA1   | ProIC | 51.90%  | 22.00% | 0.38 | 2.16E-02 |
| FBXW5   | ProIC | 71.20%  | 34.00% | 0.25 | 2.27E-02 |
| CTNNA1  | ProIC | 80.80%  | 45.10% | 0.37 | 2.53E-02 |
| CTSZ    | ProIC | 80.80%  | 45.40% | 0.54 | 2.60E-02 |
| PDCD5   | ProIC | 94.20%  | 66.00% | 0.33 | 2.67E-02 |
| CAPG    | ProIC | 82.70%  | 63.30% | 0.55 | 2.74E-02 |
| RRAD    | ProIC | 34.60%  | 9.90%  | 0.37 | 2.89E-02 |
| STOML2  | ProIC | 84.60%  | 50.20% | 0.25 | 3.37E-02 |
| MLF2    | ProIC | 92.30%  | 62.50% | 0.31 | 3.38E-02 |
| CD44    | ProIC | 100.00% | 90.20% | 0.37 | 3.84E-02 |
| HNRNPAB | ProIC | 73.10%  | 36.30% | 0.27 | 4.05E-02 |
| SLC16A3 | ProIC | 65.40%  | 31.70% | 0.47 | 4.22E-02 |

|          |       |         |        |      |          |
|----------|-------|---------|--------|------|----------|
| ARHGDIB  | ProIC | 51.90%  | 21.40% | 0.33 | 4.62E-02 |
| PSMD7    | ProIC | 88.50%  | 54.80% | 0.26 | 5.05E-02 |
| DYNLT1   | ProIC | 80.80%  | 53.70% | 0.38 | 5.64E-02 |
| PSMC3    | ProIC | 88.50%  | 61.90% | 0.35 | 6.08E-02 |
| COX7A2   | ProIC | 98.10%  | 93.00% | 0.34 | 6.36E-02 |
| KLF6     | ProIC | 92.30%  | 80.30% | 0.59 | 6.41E-02 |
| TIMM10   | ProIC | 73.10%  | 38.90% | 0.34 | 6.66E-02 |
| GSTO1    | ProIC | 96.20%  | 70.10% | 0.31 | 6.69E-02 |
| CLIC4    | ProIC | 84.60%  | 53.70% | 0.33 | 7.28E-02 |
| KIAA0040 | ProIC | 61.50%  | 27.40% | 0.26 | 8.05E-02 |
| NDUFS8   | ProIC | 90.40%  | 59.50% | 0.32 | 9.47E-02 |
| TPM2     | ProIC | 80.80%  | 45.30% | 0.31 | 9.49E-02 |
| CA5B     | ProIC | 57.70%  | 24.00% | 0.25 | 9.83E-02 |
| SPAG9    | ProIC | 92.30%  | 61.50% | 0.25 | 1.03E-01 |
| DESI2    | ProIC | 65.40%  | 30.80% | 0.27 | 1.11E-01 |
| CNIH4    | ProIC | 80.80%  | 49.80% | 0.35 | 1.12E-01 |
| GTF3A    | ProIC | 90.40%  | 59.00% | 0.29 | 1.20E-01 |
| DGCR6L   | ProIC | 71.20%  | 35.70% | 0.28 | 1.29E-01 |
| ABL2     | ProIC | 90.40%  | 66.20% | 0.33 | 1.41E-01 |
| IGFBP3   | ProIC | 21.20%  | 6.20%  | 0.51 | 1.42E-01 |
| ANKRD28  | ProIC | 90.40%  | 58.90% | 0.34 | 1.58E-01 |
| RFC1     | ProIC | 67.30%  | 33.30% | 0.29 | 1.70E-01 |
| VPS29    | ProIC | 92.30%  | 62.70% | 0.29 | 1.79E-01 |
| FDPS     | ProIC | 78.80%  | 44.10% | 0.26 | 1.83E-01 |
| CD59     | ProIC | 94.20%  | 82.20% | 0.45 | 2.04E-01 |
| GPAA1    | ProIC | 90.40%  | 59.80% | 0.29 | 2.21E-01 |
| BAX      | ProIC | 67.30%  | 42.00% | 0.26 | 2.23E-01 |
| RBBP7    | ProIC | 78.80%  | 45.20% | 0.31 | 2.39E-01 |
| TMCO3    | ProIC | 75.00%  | 42.90% | 0.32 | 2.97E-01 |
| ANXA5    | ProIC | 100.00% | 94.80% | 0.35 | 3.43E-01 |
| LRRFIP1  | ProIC | 92.30%  | 64.40% | 0.33 | 3.46E-01 |
| TGFB111  | ProIC | 69.20%  | 38.20% | 0.30 | 3.72E-01 |
| PHLDA2   | ProIC | 86.50%  | 55.50% | 0.36 | 3.77E-01 |
| PCBP2    | ProIC | 96.20%  | 83.70% | 0.30 | 3.83E-01 |
| ZFP91    | ProIC | 55.80%  | 24.10% | 0.26 | 3.92E-01 |
| TP53113  | ProIC | 63.50%  | 30.30% | 0.28 | 3.92E-01 |
| CCND1    | ProIC | 71.20%  | 48.70% | 0.52 | 4.17E-01 |
| MRPL23   | ProIC | 88.50%  | 57.80% | 0.28 | 4.39E-01 |
| SUMO2    | ProIC | 100.00% | 92.40% | 0.29 | 5.05E-01 |
| TRAPPC1  | ProIC | 76.90%  | 47.00% | 0.26 | 5.22E-01 |
| ECM1     | ProIC | 88.50%  | 57.70% | 0.25 | 5.27E-01 |

|          |       |         |        |      |          |
|----------|-------|---------|--------|------|----------|
| RBP4     | ProIC | 42.30%  | 14.30% | 0.32 | 5.52E-01 |
| PTTG1IP  | ProIC | 88.50%  | 61.90% | 0.29 | 7.34E-01 |
| C19orf43 | ProIC | 92.30%  | 76.50% | 0.33 | 7.94E-01 |
| MPC2     | ProIC | 88.50%  | 63.40% | 0.30 | 8.69E-01 |
| GNAI2    | ProIC | 86.50%  | 56.10% | 0.25 | 8.85E-01 |
| ISLR     | ProIC | 75.00%  | 72.10% | 0.46 | 9.09E-01 |
| PA2G4    | ProIC | 92.30%  | 67.70% | 0.30 | 1.00E+00 |
| ATP5J2   | ProIC | 96.20%  | 83.70% | 0.28 | 1.00E+00 |
| ISOC2    | ProIC | 69.20%  | 39.80% | 0.32 | 1.00E+00 |
| TCEB2    | ProIC | 98.10%  | 91.00% | 0.28 | 1.00E+00 |
| MRPL41   | ProIC | 82.70%  | 57.80% | 0.33 | 1.00E+00 |
| CCDC85B  | ProIC | 88.50%  | 69.40% | 0.35 | 1.00E+00 |
| HSPB11   | ProIC | 73.10%  | 42.10% | 0.26 | 1.00E+00 |
| S100A10  | ProIC | 100.00% | 99.30% | 0.42 | 1.00E+00 |
| MRP63    | ProIC | 82.70%  | 53.50% | 0.28 | 1.00E+00 |
| PHPT1    | ProIC | 92.30%  | 72.90% | 0.31 | 1.00E+00 |
| ANPEP    | ProIC | 69.20%  | 38.30% | 0.30 | 1.00E+00 |
| RPL28    | ProIC | 100.00% | 99.70% | 0.28 | 1.00E+00 |
| PLAUR    | ProIC | 80.80%  | 60.00% | 0.36 | 1.00E+00 |
| UQCC2    | ProIC | 73.10%  | 42.90% | 0.27 | 1.00E+00 |
| NQO2     | ProIC | 75.00%  | 44.40% | 0.25 | 1.00E+00 |
| ACTA2    | ProIC | 46.20%  | 18.70% | 0.28 | 1.00E+00 |
| FAM180A  | ProIC | 63.50%  | 33.10% | 0.31 | 1.00E+00 |
| KDM6B    | ProIC | 76.90%  | 55.60% | 0.27 | 1.00E+00 |
| UQCRH    | ProIC | 98.10%  | 84.00% | 0.25 | 1.00E+00 |
| COTL1    | ProIC | 42.30%  | 17.10% | 0.29 | 1.00E+00 |
| RBMX     | ProIC | 90.40%  | 65.80% | 0.27 | 1.00E+00 |
| DKK3     | ProIC | 82.70%  | 56.00% | 0.32 | 1.00E+00 |
| CTSB     | ProIC | 98.10%  | 81.20% | 0.32 | 1.00E+00 |
| C12orf57 | ProIC | 94.20%  | 83.40% | 0.32 | 1.00E+00 |
| H2AFJ    | ProIC | 90.40%  | 68.10% | 0.29 | 1.00E+00 |
| TM4SF1   | ProIC | 78.80%  | 50.80% | 0.32 | 1.00E+00 |
| MIF      | ProIC | 92.30%  | 71.00% | 0.29 | 1.00E+00 |
| UBE2D2   | ProIC | 88.50%  | 63.90% | 0.27 | 1.00E+00 |
| ARHGDI A | ProIC | 90.40%  | 66.80% | 0.27 | 1.00E+00 |
| NDUFA4L2 | ProIC | 88.50%  | 66.20% | 0.49 | 1.00E+00 |
| COL6A2   | ProIC | 88.50%  | 86.30% | 0.37 | 1.00E+00 |
| CSTB     | ProIC | 90.40%  | 82.20% | 0.39 | 1.00E+00 |
| UQC RFS1 | ProIC | 80.80%  | 54.10% | 0.26 | 1.00E+00 |
| PTHLH    | ProIC | 46.20%  | 20.80% | 0.25 | 1.00E+00 |
| VKORC1   | ProIC | 98.10%  | 82.40% | 0.28 | 1.00E+00 |

|          |       |         |        |      |          |
|----------|-------|---------|--------|------|----------|
| ELN      | ProIC | 63.50%  | 36.70% | 0.35 | 1.00E+00 |
| COL1A2   | ProIC | 90.40%  | 87.00% | 0.53 | 1.00E+00 |
| RCAN1    | ProIC | 76.90%  | 52.20% | 0.38 | 1.00E+00 |
| NOTCH3   | ProIC | 25.00%  | 7.90%  | 0.30 | 1.00E+00 |
| CDA      | ProIC | 48.10%  | 24.20% | 0.26 | 1.00E+00 |
| ACTB     | ProIC | 100.00% | 99.90% | 0.25 | 1.00E+00 |
| MFGE8    | ProIC | 84.60%  | 67.40% | 0.30 | 1.00E+00 |
| HAS2     | ProIC | 26.90%  | 11.00% | 0.28 | 1.00E+00 |
| RGS5     | ProIC | 25.00%  | 7.70%  | 0.68 | 1.00E+00 |
| CIB1     | ProIC | 90.40%  | 73.20% | 0.26 | 1.00E+00 |
| KCNMA1   | ProIC | 57.70%  | 34.00% | 0.34 | 1.00E+00 |
| CXCL2    | ProIC | 82.70%  | 59.90% | 0.39 | 1.00E+00 |
| NT5E     | ProIC | 71.20%  | 47.40% | 0.26 | 1.00E+00 |
| MT2A     | ProIC | 100.00% | 95.20% | 0.40 | 1.00E+00 |
| SEP7     | ProIC | 90.40%  | 83.10% | 0.28 | 1.00E+00 |
| PRG4     | SIF   | 99.70%  | 92.40% | 2.00 | 0.00E+00 |
| CSN1S1   | SIF   | 15.50%  | 10.00% | 1.95 | 0.00E+00 |
| INHBA    | SIF   | 82.50%  | 41.40% | 1.76 | 0.00E+00 |
| HTRA1    | SIF   | 97.30%  | 76.40% | 1.76 | 0.00E+00 |
| CLU      | SIF   | 99.80%  | 91.60% | 1.67 | 0.00E+00 |
| DEFB1    | SIF   | 82.90%  | 20.30% | 1.55 | 0.00E+00 |
| CRTAC1   | SIF   | 99.60%  | 82.20% | 1.40 | 0.00E+00 |
| CD55     | SIF   | 94.60%  | 73.90% | 1.39 | 0.00E+00 |
| FN1      | SIF   | 99.90%  | 94.50% | 1.38 | 0.00E+00 |
| TIMP3    | SIF   | 96.50%  | 72.50% | 1.37 | 0.00E+00 |
| TNFAIP6  | SIF   | 91.30%  | 69.70% | 1.27 | 0.00E+00 |
| ERRFI1   | SIF   | 95.10%  | 65.70% | 1.14 | 0.00E+00 |
| TWISTNB  | SIF   | 69.00%  | 38.20% | 1.14 | 0.00E+00 |
| HBEGF    | SIF   | 85.40%  | 42.20% | 1.11 | 0.00E+00 |
| GFPT2    | SIF   | 87.90%  | 46.70% | 1.07 | 0.00E+00 |
| MT2A     | SIF   | 99.80%  | 93.30% | 1.04 | 0.00E+00 |
| AK1      | SIF   | 97.10%  | 67.90% | 0.99 | 0.00E+00 |
| IGFBP5   | SIF   | 76.90%  | 40.20% | 0.94 | 0.00E+00 |
| C2orf40  | SIF   | 90.10%  | 52.20% | 0.91 | 0.00E+00 |
| MT1X     | SIF   | 93.80%  | 72.40% | 0.87 | 0.00E+00 |
| NDUFA4L2 | SIF   | 89.00%  | 56.50% | 0.87 | 0.00E+00 |
| PROCR    | SIF   | 82.50%  | 43.40% | 0.85 | 0.00E+00 |
| PCOLCE2  | SIF   | 95.60%  | 58.70% | 0.80 | 0.00E+00 |
| HAS1     | SIF   | 87.00%  | 54.40% | 0.78 | 0.00E+00 |
| SLC7A2   | SIF   | 42.10%  | 12.00% | 0.78 | 0.00E+00 |
| SMIM14   | SIF   | 92.10%  | 61.90% | 0.77 | 0.00E+00 |

|           |     |        |        |      |                       |
|-----------|-----|--------|--------|------|-----------------------|
| CRLF1     | SIF | 71.30% | 38.90% | 0.77 | 0.00E+00              |
| VKORC1    | SIF | 94.30% | 77.40% | 0.75 | 0.00E+00              |
| CDO1      | SIF | 85.70% | 56.50% | 0.73 | 0.00E+00              |
| PTGES     | SIF | 55.90% | 27.40% | 0.72 | 0.00E+00              |
| GPX3      | SIF | 96.10% | 72.90% | 0.71 | 0.00E+00              |
| SLC39A14  | SIF | 82.00% | 46.40% | 0.71 | 0.00E+00              |
| UGP2      | SIF | 92.90% | 68.40% | 0.68 | 0.00E+00              |
| HHIP      | SIF | 39.50% | 3.70%  | 0.68 | 0.00E+00              |
| TMEM196   | SIF | 56.00% | 18.90% | 0.67 | 0.00E+00              |
| ITGB8     | SIF | 64.50% | 19.70% | 0.66 | 0.00E+00              |
| CAPS      | SIF | 74.60% | 25.50% | 0.65 | 0.00E+00              |
| UAP1      | SIF | 93.60% | 69.20% | 0.64 | 0.00E+00              |
| HSD3B7    | SIF | 83.20% | 44.10% | 0.58 | 0.00E+00              |
| ARL2      | SIF | 91.60% | 64.90% | 0.57 | 0.00E+00              |
| PLEKHA1   | SIF | 74.50% | 36.70% | 0.57 | 0.00E+00              |
| SH3BGRL3  | SIF | 98.40% | 92.90% | 0.56 | 0.00E+00              |
| MT1F      | SIF | 54.70% | 19.10% | 0.56 | 0.00E+00              |
| C10orf105 | SIF | 55.60% | 11.00% | 0.54 | 0.00E+00              |
| F5        | SIF | 58.80% | 19.10% | 0.53 | 0.00E+00              |
| CD151     | SIF | 96.50% | 80.30% | 0.52 | 0.00E+00              |
| CD164     | SIF | 84.80% | 71.40% | 0.52 | 0.00E+00              |
| SOD1      | SIF | 98.20% | 92.80% | 0.49 | 0.00E+00              |
| ALDOA     | SIF | 98.30% | 94.30% | 0.47 | 0.00E+00              |
| LDHA      | SIF | 99.30% | 95.00% | 0.46 | 0.00E+00              |
| BTC       | SIF | 48.10% | 10.10% | 0.45 | 0.00E+00              |
| SEMA3A    | SIF | 32.30% | 4.00%  | 0.43 | 0.00E+00              |
| PVRL4     | SIF | 31.50% | 3.60%  | 0.42 | 0.00E+00              |
| SLC2A12   | SIF | 43.80% | 8.70%  | 0.40 | 0.00E+00              |
| GPR64     | SIF | 43.70% | 10.10% | 0.39 | 0.00E+00              |
| HHIP-AS1  | SIF | 29.30% | 2.50%  | 0.31 | 0.00E+00              |
| RCAN1     | SIF | 73.30% | 43.20% | 0.75 | 3.07241175005999e-313 |
| BCAT1     | SIF | 76.30% | 39.50% | 0.46 | 9.17E-307             |
| SOX5      | SIF | 58.90% | 21.90% | 0.41 | 2.20E-306             |
| DLX4      | SIF | 54.50% | 18.30% | 0.45 | 1.67E-305             |
| SLC29A1   | SIF | 68.20% | 30.90% | 0.49 | 5.24E-302             |
| PRELP     | SIF | 88.40% | 72.10% | 0.95 | 8.72E-302             |
| MGP       | SIF | 99.90% | 91.50% | 0.36 | 5.83E-300             |
| TPD52L1   | SIF | 67.10% | 30.90% | 0.51 | 4.77E-298             |
| ADAMTS6   | SIF | 41.50% | 9.50%  | 0.41 | 3.15E-295             |
| SEMA3E    | SIF | 49.20% | 14.90% | 0.43 | 2.62E-294             |
| ZNF385B   | SIF | 44.00% | 12.50% | 0.42 | 4.49E-294             |

|               |     |        |        |      |           |
|---------------|-----|--------|--------|------|-----------|
| RP11-680F20.6 | SIF | 36.80% | 7.50%  | 0.38 | 1.80E-293 |
| LUM           | SIF | 99.90% | 89.60% | 0.26 | 2.49E-291 |
| RGCC          | SIF | 77.80% | 45.60% | 0.58 | 5.39E-290 |
| PLP2          | SIF | 93.20% | 73.60% | 0.51 | 1.06E-287 |
| ITPR3         | SIF | 44.60% | 12.50% | 0.39 | 3.44E-287 |
| SEMA3C        | SIF | 73.80% | 38.00% | 0.48 | 1.27E-286 |
| CD9           | SIF | 99.50% | 94.00% | 0.56 | 5.18E-284 |
| SELM          | SIF | 96.90% | 84.00% | 0.40 | 1.03E-282 |
| SORBS2        | SIF | 60.60% | 24.20% | 0.43 | 2.24E-282 |
| GABRA4        | SIF | 26.50% | 2.80%  | 0.29 | 9.84E-277 |
| SCARA3        | SIF | 58.90% | 23.90% | 0.45 | 4.34E-272 |
| PFKP          | SIF | 84.40% | 57.10% | 0.53 | 3.48E-271 |
| THBS4         | SIF | 76.60% | 41.50% | 0.52 | 2.88E-270 |
| NUPR1         | SIF | 96.70% | 80.60% | 0.47 | 1.91E-264 |
| ENPP1         | SIF | 66.40% | 31.00% | 0.52 | 5.13E-261 |
| UGDH          | SIF | 90.80% | 65.30% | 0.47 | 2.29E-260 |
| REXO2         | SIF | 94.60% | 74.40% | 0.43 | 1.67E-258 |
| MMP3          | SIF | 40.90% | 17.90% | 1.55 | 1.42E-256 |
| C11orf96      | SIF | 62.80% | 31.70% | 0.57 | 2.43E-255 |
| MT1G          | SIF | 41.40% | 11.90% | 0.63 | 3.89E-255 |
| TNXB          | SIF | 93.50% | 65.40% | 0.42 | 3.60E-253 |
| FABP3         | SIF | 41.90% | 15.60% | 1.03 | 4.46E-253 |
| ADAMTSS5      | SIF | 40.60% | 13.40% | 0.43 | 1.77E-251 |
| CHPF          | SIF | 57.60% | 25.00% | 0.41 | 2.11E-251 |
| DNASE1L3      | SIF | 31.80% | 6.60%  | 0.49 | 1.31E-250 |
| NTN4          | SIF | 52.50% | 21.00% | 0.40 | 9.79E-249 |
| ANK3          | SIF | 27.60% | 4.10%  | 0.26 | 8.61E-245 |
| TREM1         | SIF | 65.50% | 38.30% | 0.58 | 3.19E-243 |
| CRYAB         | SIF | 88.60% | 61.30% | 0.54 | 1.76E-238 |
| CREB5         | SIF | 73.80% | 41.80% | 0.43 | 2.02E-238 |
| MT1E          | SIF | 91.00% | 66.50% | 0.56 | 3.78E-231 |
| ITM2B         | SIF | 99.90% | 99.50% | 0.39 | 1.30E-226 |
| DYSF          | SIF | 26.40% | 4.50%  | 0.34 | 1.01E-224 |
| TPPP3         | SIF | 95.60% | 79.90% | 0.58 | 1.07E-222 |
| CAV1          | SIF | 96.20% | 74.10% | 0.34 | 7.18E-220 |
| GPR1          | SIF | 23.30% | 4.40%  | 0.50 | 7.81E-220 |
| AMTN          | SIF | 21.00% | 5.60%  | 1.16 | 5.55E-219 |
| VCAM1         | SIF | 61.80% | 35.50% | 0.78 | 2.30E-215 |
| SAT1          | SIF | 98.40% | 94.00% | 0.34 | 4.34E-215 |
| TMEM100       | SIF | 65.50% | 33.40% | 0.44 | 5.96E-215 |
| COX7A1        | SIF | 87.10% | 63.40% | 0.40 | 3.88E-212 |



|            |     |        |        |      |           |
|------------|-----|--------|--------|------|-----------|
| ANGPTL2    | SIF | 96.00% | 74.70% | 0.38 | 6.52E-208 |
| RABAC1     | SIF | 95.50% | 85.80% | 0.40 | 2.29E-207 |
| FAM134B    | SIF | 74.30% | 44.40% | 0.39 | 3.32E-206 |
| BMP2       | SIF | 30.30% | 11.30% | 0.46 | 5.54E-205 |
| SEC61G     | SIF | 95.20% | 87.00% | 0.35 | 1.01E-203 |
| MT1M       | SIF | 81.00% | 52.70% | 0.56 | 2.86E-203 |
| SEMA5A     | SIF | 29.70% | 6.60%  | 0.33 | 5.14E-202 |
| EMP3       | SIF | 98.40% | 92.90% | 0.50 | 2.34E-198 |
| TNFRSF11B  | SIF | 42.90% | 33.60% | 0.71 | 1.68E-194 |
| FXYD5      | SIF | 90.50% | 79.00% | 0.43 | 8.23E-193 |
| SLC9A3R1   | SIF | 48.50% | 19.80% | 0.30 | 8.26E-192 |
| ACKR3      | SIF | 74.00% | 43.00% | 0.39 | 2.50E-191 |
| GPRC5A     | SIF | 84.30% | 56.40% | 0.36 | 4.29E-191 |
| COX7A2     | SIF | 96.30% | 91.50% | 0.30 | 1.28E-190 |
| CDON       | SIF | 57.50% | 27.40% | 0.32 | 3.32E-190 |
| FXYD6      | SIF | 57.00% | 26.40% | 0.32 | 4.29E-189 |
| SLC2A1     | SIF | 39.90% | 13.90% | 0.27 | 2.11E-188 |
| SGCA       | SIF | 45.10% | 17.20% | 0.31 | 1.24E-185 |
| FMOD       | SIF | 77.90% | 57.00% | 0.62 | 4.49E-185 |
| SEC11C     | SIF | 57.20% | 27.30% | 0.29 | 2.47E-182 |
| NDP        | SIF | 28.60% | 7.00%  | 0.26 | 1.50E-178 |
| VASN       | SIF | 83.50% | 58.00% | 0.40 | 8.47E-176 |
| BZW1       | SIF | 91.70% | 78.20% | 0.35 | 1.26E-174 |
| S100A3     | SIF | 43.10% | 17.00% | 0.33 | 4.28E-174 |
| NDFIP1     | SIF | 92.00% | 77.40% | 0.36 | 1.44E-173 |
| GULP1      | SIF | 50.40% | 22.50% | 0.29 | 1.63E-173 |
| HTRA4      | SIF | 19.30% | 2.80%  | 0.30 | 1.66E-171 |
| GUK1       | SIF | 95.20% | 88.80% | 0.31 | 5.85E-171 |
| DIRC3      | SIF | 16.00% | 1.50%  | 0.33 | 3.77E-170 |
| CSGALNACT1 | SIF | 52.60% | 24.60% | 0.31 | 1.57E-168 |
| SPARCL1    | SIF | 88.10% | 71.80% | 0.62 | 2.48E-165 |
| GABARAPL1  | SIF | 75.30% | 51.70% | 0.35 | 9.43E-163 |
| COX17      | SIF | 81.50% | 61.20% | 0.34 | 1.00E-162 |
| INO80C     | SIF | 47.70% | 22.40% | 0.28 | 6.26E-157 |
| OST4       | SIF | 97.20% | 92.20% | 0.27 | 6.32E-156 |
| BTG2       | SIF | 71.60% | 53.50% | 0.44 | 6.41E-156 |
| SBDS       | SIF | 92.90% | 79.20% | 0.32 | 1.00E-154 |
| PPDPF      | SIF | 95.50% | 89.30% | 0.32 | 2.75E-154 |
| SOD3       | SIF | 43.40% | 18.10% | 0.36 | 9.49E-152 |
| ISLR       | SIF | 88.40% | 65.00% | 0.30 | 2.38E-151 |
| CTGF       | SIF | 90.50% | 68.30% | 0.32 | 1.42E-150 |

|          |     |        |        |      |           |
|----------|-----|--------|--------|------|-----------|
| CIB1     | SIF | 84.90% | 68.30% | 0.31 | 4.86E-149 |
| APLP2    | SIF | 94.50% | 84.90% | 0.33 | 5.94E-144 |
| RERG     | SIF | 70.90% | 44.10% | 0.28 | 5.31E-141 |
| SERPINA1 | SIF | 27.40% | 8.00%  | 0.37 | 1.45E-139 |
| FAM180A  | SIF | 51.20% | 25.50% | 0.29 | 9.48E-139 |
| HMGCS1   | SIF | 30.00% | 20.50% | 0.27 | 5.83E-137 |
| VIMP     | SIF | 89.70% | 72.10% | 0.29 | 2.92E-136 |
| CUX1     | SIF | 62.10% | 36.50% | 0.26 | 1.43E-133 |
| NDUFA4   | SIF | 97.10% | 91.20% | 0.27 | 3.09E-133 |
| ANKH     | SIF | 76.80% | 52.70% | 0.33 | 9.26E-133 |
| TIMP1    | SIF | 99.40% | 95.30% | 0.42 | 1.31E-132 |
| MRPL17   | SIF | 53.20% | 29.30% | 0.27 | 3.14E-132 |
| SSR4     | SIF | 94.10% | 87.50% | 0.28 | 5.99E-132 |
| RGS16    | SIF | 74.20% | 50.60% | 0.45 | 1.34E-131 |
| TSPAN15  | SIF | 42.10% | 19.20% | 0.25 | 1.95E-128 |
| NUCB2    | SIF | 82.10% | 63.50% | 0.33 | 4.57E-128 |
| PGAM1    | SIF | 83.30% | 68.50% | 0.34 | 6.30E-128 |
| MINOS1   | SIF | 93.90% | 84.00% | 0.27 | 6.61E-128 |
| DSTN     | SIF | 99.20% | 95.40% | 0.29 | 9.50E-127 |
| GAPDH    | SIF | 99.20% | 99.40% | 0.32 | 1.07E-120 |
| PENK     | SIF | 11.70% | 5.40%  | 1.02 | 1.03E-119 |
| PDLIM5   | SIF | 67.00% | 43.50% | 0.26 | 1.16E-117 |
| TIMP2    | SIF | 95.00% | 81.90% | 0.27 | 1.07E-116 |
| CYB5R3   | SIF | 94.40% | 80.30% | 0.25 | 2.75E-114 |
| ITGB5    | SIF | 62.10% | 41.20% | 0.30 | 7.73E-114 |
| ITGAV    | SIF | 63.70% | 40.40% | 0.26 | 1.35E-113 |
| C19orf10 | SIF | 89.40% | 77.20% | 0.29 | 1.13E-112 |
| ANGPTL4  | SIF | 80.10% | 59.70% | 0.41 | 3.84E-112 |
| AXL      | SIF | 71.60% | 49.80% | 0.31 | 3.14E-111 |
| PRDX1    | SIF | 98.30% | 95.10% | 0.27 | 4.35E-111 |
| TMED3    | SIF | 69.70% | 49.60% | 0.27 | 4.80E-111 |
| BLOC1S2  | SIF | 65.90% | 43.90% | 0.26 | 9.02E-110 |
| CD82     | SIF | 50.70% | 27.80% | 0.25 | 3.38E-109 |
| TMED9    | SIF | 91.60% | 79.10% | 0.26 | 5.70E-109 |
| CRIP1    | SIF | 93.10% | 83.10% | 0.37 | 2.06E-106 |
| CFI      | SIF | 65.40% | 41.70% | 0.27 | 5.88E-106 |
| PMP22    | SIF | 95.40% | 84.60% | 0.27 | 6.22E-106 |
| KDEL3    | SIF | 61.90% | 38.70% | 0.26 | 1.16E-105 |
| CYSTM1   | SIF | 81.60% | 64.70% | 0.25 | 7.94E-104 |
| PHLDA2   | SIF | 70.70% | 49.10% | 0.31 | 4.81E-103 |
| AKR1B1   | SIF | 73.60% | 56.40% | 0.32 | 7.85E-102 |

|          |     |        |        |      |           |
|----------|-----|--------|--------|------|-----------|
| APP      | SIF | 87.50% | 75.30% | 0.26 | 1.53E-101 |
| CADM3    | SIF | 38.40% | 18.00% | 0.30 | 1.96E-101 |
| SOX9     | SIF | 39.30% | 20.10% | 0.28 | 2.45E-101 |
| C10orf54 | SIF | 80.50% | 60.80% | 0.25 | 2.35E-95  |
| P4HB     | SIF | 92.70% | 81.40% | 0.25 | 4.39E-88  |
| XBP1     | SIF | 86.50% | 72.50% | 0.27 | 2.00E-87  |
| PRDX4    | SIF | 83.90% | 68.60% | 0.25 | 1.29E-86  |
| CXCL1    | SIF | 55.10% | 42.50% | 0.80 | 5.73E-86  |
| CILP     | SIF | 43.80% | 34.30% | 0.60 | 8.72E-85  |
| KCNMA1   | SIF | 47.80% | 28.20% | 0.26 | 4.16E-82  |
| ITGBL1   | SIF | 31.00% | 15.10% | 0.25 | 8.28E-81  |
| HSPB1    | SIF | 97.10% | 93.40% | 0.31 | 2.05E-76  |
| SERPINE2 | SIF | 45.10% | 30.50% | 0.47 | 6.11E-74  |
| CCL20    | SIF | 20.60% | 10.30% | 1.00 | 3.07E-70  |
| CDA      | SIF | 35.40% | 19.60% | 0.28 | 4.39E-69  |
| PTPRS    | SIF | 47.40% | 31.40% | 0.26 | 3.28E-58  |
| C8orf4   | SIF | 17.70% | 9.90%  | 0.26 | 4.02E-32  |
| CXCL14   | SIF | 10.60% | 6.20%  | 0.60 | 5.36E-18  |
| WISP2    | SSF | 84.20% | 37.50% | 1.88 | 0.00E+00  |
| IGF1     | SSF | 72.30% | 15.70% | 1.88 | 0.00E+00  |
| CXCL12   | SSF | 71.80% | 25.10% | 1.74 | 0.00E+00  |
| COL1A1   | SSF | 93.60% | 47.50% | 1.73 | 0.00E+00  |
| COL3A1   | SSF | 93.40% | 58.70% | 1.69 | 0.00E+00  |
| MMP2     | SSF | 88.60% | 35.50% | 1.56 | 0.00E+00  |
| MFAP5    | SSF | 54.10% | 10.70% | 1.53 | 0.00E+00  |
| SERPINF1 | SSF | 79.40% | 44.60% | 1.44 | 0.00E+00  |
| DPT      | SSF | 97.40% | 57.50% | 1.42 | 0.00E+00  |
| COL14A1  | SSF | 86.90% | 23.30% | 1.36 | 0.00E+00  |
| COL1A2   | SSF | 99.70% | 75.60% | 1.28 | 0.00E+00  |
| VCAN     | SSF | 91.30% | 48.40% | 1.24 | 0.00E+00  |
| SFRP4    | SSF | 48.40% | 10.80% | 1.22 | 0.00E+00  |
| EFEMP1   | SSF | 82.70% | 48.20% | 1.20 | 0.00E+00  |
| ASPN     | SSF | 96.20% | 58.40% | 1.19 | 0.00E+00  |
| C1R      | SSF | 97.80% | 66.90% | 1.17 | 0.00E+00  |
| C1S      | SSF | 97.80% | 68.80% | 1.13 | 0.00E+00  |
| CFH      | SSF | 87.70% | 44.40% | 1.13 | 0.00E+00  |
| AEBP1    | SSF | 83.70% | 31.70% | 1.05 | 0.00E+00  |
| PDGFRL   | SSF | 78.10% | 30.20% | 1.04 | 0.00E+00  |
| DCN      | SSF | 99.90% | 84.60% | 1.00 | 0.00E+00  |
| FSTL1    | SSF | 97.70% | 67.20% | 1.00 | 0.00E+00  |
| IGFBP4   | SSF | 79.90% | 55.10% | 0.99 | 0.00E+00  |

|          |     |        |        |      |          |
|----------|-----|--------|--------|------|----------|
| IGFBP6   | SSF | 92.30% | 68.50% | 0.99 | 0.00E+00 |
| PPAP2A   | SSF | 84.80% | 42.30% | 0.98 | 0.00E+00 |
| FHL1     | SSF | 92.20% | 62.40% | 0.98 | 0.00E+00 |
| CRABP2   | SSF | 55.40% | 17.60% | 0.96 | 0.00E+00 |
| COL6A2   | SSF | 99.60% | 74.50% | 0.96 | 0.00E+00 |
| COL6A1   | SSF | 97.50% | 67.60% | 0.92 | 0.00E+00 |
| CP       | SSF | 55.90% | 15.00% | 0.91 | 0.00E+00 |
| SCG2     | SSF | 31.00% | 3.70%  | 0.91 | 0.00E+00 |
| SPON2    | SSF | 51.10% | 8.70%  | 0.88 | 0.00E+00 |
| COL6A3   | SSF | 91.20% | 58.40% | 0.88 | 0.00E+00 |
| SERPING1 | SSF | 96.70% | 72.90% | 0.82 | 0.00E+00 |
| THY1     | SSF | 82.50% | 36.40% | 0.81 | 0.00E+00 |
| MXRA8    | SSF | 81.80% | 42.60% | 0.80 | 0.00E+00 |
| BGN      | SSF | 97.40% | 70.00% | 0.80 | 0.00E+00 |
| PLTP     | SSF | 85.00% | 56.20% | 0.79 | 0.00E+00 |
| SPARC    | SSF | 95.30% | 72.50% | 0.76 | 0.00E+00 |
| PLA2G2A  | SSF | 98.90% | 84.50% | 0.76 | 0.00E+00 |
| ECM2     | SSF | 73.40% | 27.60% | 0.75 | 0.00E+00 |
| CTSK     | SSF | 86.70% | 54.10% | 0.74 | 0.00E+00 |
| S100A13  | SSF | 94.20% | 67.00% | 0.74 | 0.00E+00 |
| GSN      | SSF | 98.20% | 86.90% | 0.74 | 0.00E+00 |
| FBLN2    | SSF | 52.50% | 14.50% | 0.73 | 0.00E+00 |
| PCOLCE   | SSF | 98.50% | 68.80% | 0.73 | 0.00E+00 |
| FBN1     | SSF | 71.30% | 32.30% | 0.73 | 0.00E+00 |
| PLAC9    | SSF | 97.50% | 71.20% | 0.72 | 0.00E+00 |
| PRSS23   | SSF | 90.60% | 64.30% | 0.72 | 0.00E+00 |
| C1QTNF3  | SSF | 62.50% | 26.30% | 0.72 | 0.00E+00 |
| SFRP1    | SSF | 44.50% | 15.80% | 0.72 | 0.00E+00 |
| MXRA5    | SSF | 63.90% | 21.90% | 0.72 | 0.00E+00 |
| COMP     | SSF | 91.30% | 64.80% | 0.72 | 0.00E+00 |
| OLFML3   | SSF | 52.80% | 8.90%  | 0.71 | 0.00E+00 |
| FNDC1    | SSF | 44.10% | 5.30%  | 0.71 | 0.00E+00 |
| SMOC2    | SSF | 57.00% | 17.60% | 0.69 | 0.00E+00 |
| COL5A2   | SSF | 69.10% | 38.60% | 0.68 | 0.00E+00 |
| TUBB2B   | SSF | 49.60% | 12.80% | 0.67 | 0.00E+00 |
| CADM1    | SSF | 43.70% | 9.10%  | 0.66 | 0.00E+00 |
| TUBA1A   | SSF | 89.10% | 70.20% | 0.66 | 0.00E+00 |
| SSPN     | SSF | 75.00% | 32.80% | 0.66 | 0.00E+00 |
| LHFP     | SSF | 82.50% | 49.20% | 0.66 | 0.00E+00 |
| ANGPTL1  | SSF | 72.50% | 38.70% | 0.65 | 0.00E+00 |
| EPHX1    | SSF | 74.90% | 42.50% | 0.65 | 0.00E+00 |

|          |     |         |         |      |                       |
|----------|-----|---------|---------|------|-----------------------|
| SRPX     | SSF | 43.60%  | 6.30%   | 0.64 | 0.00E+00              |
| CNN3     | SSF | 87.30%  | 50.80%  | 0.62 | 0.00E+00              |
| AKR1C1   | SSF | 78.30%  | 42.90%  | 0.62 | 0.00E+00              |
| ITM2C    | SSF | 64.60%  | 29.60%  | 0.62 | 0.00E+00              |
| FGF7     | SSF | 32.40%  | 4.50%   | 0.62 | 0.00E+00              |
| FBLN1    | SSF | 46.60%  | 11.60%  | 0.61 | 0.00E+00              |
| NNMT     | SSF | 98.70%  | 76.30%  | 0.60 | 0.00E+00              |
| PODN     | SSF | 36.70%  | 3.50%   | 0.60 | 0.00E+00              |
| ELN      | SSF | 54.20%  | 21.40%  | 0.59 | 0.00E+00              |
| CCDC80   | SSF | 97.50%  | 68.60%  | 0.58 | 0.00E+00              |
| AKR1C2   | SSF | 73.20%  | 40.30%  | 0.57 | 0.00E+00              |
| LUM      | SSF | 99.90%  | 86.30%  | 0.57 | 0.00E+00              |
| LIMA1    | SSF | 87.10%  | 57.60%  | 0.56 | 0.00E+00              |
| FAM180B  | SSF | 39.70%  | 5.10%   | 0.56 | 0.00E+00              |
| SDC2     | SSF | 91.60%  | 65.50%  | 0.56 | 0.00E+00              |
| THBS3    | SSF | 69.60%  | 35.00%  | 0.55 | 0.00E+00              |
| PDGFRA   | SSF | 69.80%  | 36.10%  | 0.54 | 0.00E+00              |
| ECM1     | SSF | 73.00%  | 44.30%  | 0.54 | 0.00E+00              |
| CPQ      | SSF | 82.50%  | 52.50%  | 0.54 | 0.00E+00              |
| SERPINH1 | SSF | 76.90%  | 45.40%  | 0.52 | 0.00E+00              |
| TSHZ2    | SSF | 68.00%  | 30.90%  | 0.51 | 0.00E+00              |
| LGALS1   | SSF | 99.40%  | 95.40%  | 0.50 | 0.00E+00              |
| ANGPTL5  | SSF | 46.70%  | 13.80%  | 0.49 | 0.00E+00              |
| ANTXR1   | SSF | 56.10%  | 24.40%  | 0.47 | 0.00E+00              |
| VIM      | SSF | 100.00% | 100.00% | 0.47 | 0.00E+00              |
| IFITM3   | SSF | 98.90%  | 87.90%  | 0.46 | 0.00E+00              |
| THBS2    | SSF | 43.10%  | 11.10%  | 0.46 | 0.00E+00              |
| TMEM98   | SSF | 56.80%  | 22.50%  | 0.45 | 0.00E+00              |
| FBLN5    | SSF | 36.40%  | 6.50%   | 0.44 | 0.00E+00              |
| CDH11    | SSF | 37.80%  | 7.10%   | 0.41 | 0.00E+00              |
| PPIB     | SSF | 98.20%  | 88.00%  | 0.39 | 0.00E+00              |
| AKR1C3   | SSF | 52.80%  | 18.40%  | 0.37 | 0.00E+00              |
| MGP      | SSF | 99.80%  | 88.90%  | 0.37 | 0.00E+00              |
| TMEM119  | SSF | 30.90%  | 3.80%   | 0.36 | 0.00E+00              |
| MYL9     | SSF | 86.60%  | 46.30%  | 0.36 | 0.00E+00              |
| LAPTM4A  | SSF | 99.30%  | 91.90%  | 0.35 | 0.00E+00              |
| CALD1    | SSF | 97.70%  | 72.00%  | 0.29 | 0.00E+00              |
| MAP1B    | SSF | 43.00%  | 14.20%  | 0.25 | 0.00E+00              |
| PDGFRB   | SSF | 57.20%  | 23.10%  | 0.47 | 1.77473073609811e-317 |
| SFRP2    | SSF | 27.70%  | 4.30%   | 1.16 | 0.00E+00              |
| EID1     | SSF | 97.50%  | 84.50%  | 0.37 | 0.00E+00              |

|          |     |        |        |      |           |
|----------|-----|--------|--------|------|-----------|
| AHNAK2   | SSF | 43.70% | 13.20% | 0.46 | 4.62E-308 |
| COL8A1   | SSF | 45.20% | 15.90% | 0.52 | 1.12E-307 |
| PRRX1    | SSF | 82.40% | 52.10% | 0.45 | 1.67E-301 |
| MEG3     | SSF | 80.80% | 47.80% | 0.42 | 7.43E-287 |
| ANGPTL2  | SSF | 94.60% | 69.10% | 0.29 | 4.88E-285 |
| MDK      | SSF | 34.40% | 8.20%  | 0.52 | 1.63E-284 |
| EFEMP2   | SSF | 70.60% | 40.60% | 0.41 | 2.01E-281 |
| PTGFR    | SSF | 30.60% | 6.90%  | 0.42 | 3.00E-279 |
| GPNMB    | SSF | 84.40% | 57.40% | 0.56 | 1.12E-276 |
| MGST1    | SSF | 66.90% | 40.20% | 0.53 | 2.86E-276 |
| FGFBP2   | SSF | 60.80% | 30.40% | 0.99 | 8.57E-276 |
| LGALS3   | SSF | 99.20% | 94.70% | 0.37 | 5.13E-267 |
| CYP1B1   | SSF | 89.40% | 68.30% | 0.59 | 3.37E-265 |
| CRISPLD1 | SSF | 52.70% | 22.50% | 0.44 | 8.76E-260 |
| SGCE     | SSF | 43.00% | 16.20% | 0.43 | 9.18E-257 |
| JUNB     | SSF | 98.90% | 97.80% | 0.62 | 1.56E-256 |
| CTHRC1   | SSF | 30.50% | 7.40%  | 0.55 | 7.59E-256 |
| CYBRD1   | SSF | 79.70% | 55.20% | 0.41 | 4.07E-254 |
| ADD3     | SSF | 50.40% | 23.60% | 0.41 | 7.84E-254 |
| OGN      | SSF | 73.30% | 41.20% | 0.46 | 1.20E-253 |
| EPB41L2  | SSF | 78.10% | 51.80% | 0.42 | 1.34E-251 |
| ID3      | SSF | 86.90% | 62.80% | 0.57 | 2.24E-251 |
| RARRES1  | SSF | 28.40% | 5.70%  | 0.56 | 6.24E-247 |
| LTBP2    | SSF | 50.80% | 23.30% | 0.48 | 1.70E-246 |
| ISLR     | SSF | 87.20% | 58.50% | 0.32 | 1.01E-243 |
| CFD      | SSF | 86.40% | 81.80% | 1.17 | 5.07E-238 |
| COL5A1   | SSF | 53.30% | 26.70% | 0.52 | 5.78E-238 |
| EBF1     | SSF | 57.70% | 29.90% | 0.44 | 1.34E-235 |
| ISM1     | SSF | 26.10% | 4.80%  | 0.28 | 6.47E-233 |
| PPIC     | SSF | 87.40% | 64.90% | 0.38 | 1.06E-231 |
| ANK2     | SSF | 46.50% | 19.70% | 0.35 | 5.79E-229 |
| PTRF     | SSF | 91.10% | 69.20% | 0.36 | 9.93E-229 |
| BICC1    | SSF | 34.90% | 11.10% | 0.33 | 1.22E-228 |
| NUCKS1   | SSF | 94.80% | 79.70% | 0.35 | 1.76E-228 |
| ABI3BP   | SSF | 84.80% | 56.90% | 0.36 | 6.67E-226 |
| NFIX     | SSF | 54.10% | 28.00% | 0.36 | 2.17E-223 |
| PTN      | SSF | 32.40% | 9.90%  | 0.62 | 7.18E-219 |
| NFIB     | SSF | 66.50% | 40.00% | 0.40 | 6.26E-218 |
| PDLIM3   | SSF | 69.30% | 41.70% | 0.39 | 2.81E-217 |
| ADIRF    | SSF | 95.90% | 82.30% | 0.34 | 1.30E-216 |
| CD248    | SSF | 38.10% | 13.70% | 0.38 | 3.29E-212 |

|          |     |        |        |      |           |
|----------|-----|--------|--------|------|-----------|
| SERTAD4  | SSF | 30.80% | 8.20%  | 0.31 | 1.59E-211 |
| LSP1     | SSF | 83.80% | 57.50% | 0.33 | 3.94E-211 |
| NFIC     | SSF | 87.40% | 66.50% | 0.34 | 3.69E-208 |
| ANXA2    | SSF | 99.60% | 97.80% | 0.30 | 5.07E-208 |
| RCN3     | SSF | 80.50% | 54.00% | 0.35 | 3.18E-207 |
| SSR2     | SSF | 90.40% | 75.60% | 0.32 | 4.20E-207 |
| GEM      | SSF | 85.90% | 66.20% | 0.59 | 4.39E-207 |
| DDAH2    | SSF | 86.20% | 69.20% | 0.37 | 3.44E-205 |
| IFITM2   | SSF | 93.60% | 82.90% | 0.40 | 1.53E-201 |
| TUBB     | SSF | 89.90% | 77.30% | 0.35 | 1.14E-197 |
| AKAP12   | SSF | 33.90% | 10.60% | 0.38 | 3.23E-195 |
| LMNA     | SSF | 99.60% | 97.80% | 0.25 | 4.37E-194 |
| DPP4     | SSF | 26.90% | 6.40%  | 0.30 | 2.83E-193 |
| P4HA2    | SSF | 63.50% | 39.40% | 0.35 | 2.15E-190 |
| C1orf21  | SSF | 60.80% | 35.60% | 0.34 | 1.39E-189 |
| MYC      | SSF | 77.10% | 55.30% | 0.55 | 3.35E-189 |
| CERCAM   | SSF | 66.30% | 40.40% | 0.37 | 7.50E-188 |
| SLPI     | SSF | 18.70% | 3.10%  | 0.58 | 2.21E-187 |
| SPOCK1   | SSF | 30.40% | 10.30% | 0.29 | 2.24E-184 |
| MRC2     | SSF | 64.40% | 40.50% | 0.36 | 3.65E-182 |
| TNC      | SSF | 69.90% | 57.60% | 0.60 | 9.96E-182 |
| DIO2     | SSF | 31.70% | 10.10% | 0.40 | 2.22E-181 |
| FKBP9    | SSF | 54.30% | 29.90% | 0.35 | 2.66E-181 |
| OSR2     | SSF | 63.70% | 39.90% | 0.45 | 9.26E-181 |
| FHL2     | SSF | 47.10% | 21.70% | 0.33 | 2.92E-178 |
| CYP27A1  | SSF | 35.60% | 14.20% | 0.27 | 6.74E-173 |
| IL11RA   | SSF | 34.40% | 13.90% | 0.27 | 2.51E-172 |
| TUBB2A   | SSF | 79.70% | 61.90% | 0.41 | 3.88E-170 |
| CHI3L2   | SSF | 43.20% | 21.50% | 0.72 | 8.16E-170 |
| PPFIBP1  | SSF | 51.30% | 26.70% | 0.30 | 2.25E-169 |
| RRBP1    | SSF | 89.90% | 72.30% | 0.30 | 1.39E-168 |
| LGALS3BP | SSF | 63.00% | 43.60% | 0.48 | 1.44E-167 |
| CHI3L1   | SSF | 34.40% | 16.20% | 1.17 | 1.97E-166 |
| LTBP1    | SSF | 58.20% | 33.30% | 0.35 | 3.10E-165 |
| CES1     | SSF | 34.90% | 15.60% | 0.39 | 4.91E-164 |
| GLIS3    | SSF | 47.70% | 25.20% | 0.35 | 1.57E-162 |
| EMP2     | SSF | 84.30% | 63.20% | 0.30 | 1.88E-162 |
| RGS3     | SSF | 45.70% | 26.20% | 0.37 | 4.03E-161 |
| NOV      | SSF | 30.50% | 11.30% | 0.48 | 4.05E-161 |
| MFGE8    | SSF | 78.30% | 57.80% | 0.46 | 3.91E-160 |
| PLXDC1   | SSF | 40.40% | 17.10% | 0.28 | 6.88E-160 |

|             |     |        |        |      |           |
|-------------|-----|--------|--------|------|-----------|
| C3          | SSF | 17.80% | 3.00%  | 0.30 | 2.84E-158 |
| GLT8D2      | SSF | 57.60% | 35.30% | 0.31 | 7.49E-158 |
| SSC5D       | SSF | 49.00% | 27.40% | 0.29 | 4.30E-156 |
| PLEKHA5     | SSF | 29.80% | 10.50% | 0.26 | 2.06E-154 |
| C2          | SSF | 54.40% | 32.10% | 0.41 | 2.06E-154 |
| TSPAN4      | SSF | 74.00% | 54.10% | 0.33 | 1.12E-150 |
| C1QTNF2     | SSF | 41.40% | 19.90% | 0.32 | 1.21E-146 |
| MRGPRF      | SSF | 50.50% | 28.00% | 0.31 | 1.00E-145 |
| S100A16     | SSF | 59.50% | 37.00% | 0.33 | 3.12E-145 |
| PAMR1       | SSF | 20.70% | 4.90%  | 0.25 | 3.74E-145 |
| SERTAD4-AS1 | SSF | 39.20% | 17.40% | 0.26 | 3.80E-145 |
| TTC3        | SSF | 74.00% | 54.30% | 0.30 | 3.83E-145 |
| RBMS3       | SSF | 40.40% | 20.00% | 0.28 | 1.28E-144 |
| CYR61       | SSF | 76.40% | 54.80% | 0.42 | 5.10E-144 |
| EGR1        | SSF | 89.50% | 74.40% | 0.36 | 2.70E-142 |
| DBN1        | SSF | 37.20% | 19.80% | 0.30 | 8.36E-142 |
| RAB34       | SSF | 75.60% | 55.00% | 0.28 | 8.85E-142 |
| EDIL3       | SSF | 45.30% | 24.40% | 0.30 | 2.87E-139 |
| EEA1        | SSF | 67.40% | 48.20% | 0.30 | 6.92E-139 |
| PDLM2       | SSF | 62.20% | 40.70% | 0.28 | 2.52E-138 |
| ADH5        | SSF | 49.10% | 29.00% | 0.29 | 5.11E-138 |
| ACTG1       | SSF | 99.80% | 98.50% | 0.25 | 8.28E-138 |
| ENPP2       | SSF | 23.80% | 7.00%  | 0.26 | 9.31E-138 |
| NGFRAP1     | SSF | 76.30% | 54.70% | 0.29 | 3.54E-136 |
| LRRN4CL     | SSF | 46.70% | 26.50% | 0.29 | 4.04E-136 |
| FAP         | SSF | 51.20% | 30.90% | 0.34 | 1.39E-134 |
| DHRS3       | SSF | 31.10% | 12.70% | 0.28 | 1.62E-134 |
| LY6E        | SSF | 83.60% | 64.30% | 0.30 | 2.93E-134 |
| GNG12       | SSF | 57.90% | 36.90% | 0.27 | 5.94E-134 |
| SRI         | SSF | 80.40% | 62.90% | 0.28 | 6.69E-134 |
| SCPEP1      | SSF | 60.40% | 40.50% | 0.30 | 7.56E-134 |
| FGFR1       | SSF | 66.50% | 46.60% | 0.30 | 1.31E-133 |
| SNAI2       | SSF | 36.20% | 16.80% | 0.35 | 6.95E-133 |
| SNX9        | SSF | 65.10% | 46.30% | 0.30 | 5.27E-132 |
| PPAP2B      | SSF | 74.90% | 53.50% | 0.38 | 1.23E-131 |
| PAM         | SSF | 75.40% | 53.60% | 0.27 | 1.56E-130 |
| C5orf15     | SSF | 59.70% | 38.90% | 0.27 | 3.21E-128 |
| ITGB1       | SSF | 92.70% | 81.80% | 0.25 | 5.10E-128 |
| PRKCDBP     | SSF | 87.50% | 69.20% | 0.26 | 3.36E-127 |
| MATN2       | SSF | 38.30% | 20.30% | 0.33 | 1.80E-126 |
| RARRES3     | SSF | 36.40% | 16.80% | 0.27 | 1.72E-125 |



|          |     |        |        |      |           |
|----------|-----|--------|--------|------|-----------|
| ENAH     | SSF | 52.60% | 31.10% | 0.28 | 2.00E-125 |
| DKK3     | SSF | 67.20% | 46.30% | 0.44 | 1.98E-124 |
| A4GALT   | SSF | 49.50% | 29.90% | 0.27 | 2.20E-121 |
| ESD      | SSF | 79.20% | 63.10% | 0.26 | 3.05E-119 |
| ZFP36L1  | SSF | 94.50% | 86.80% | 0.30 | 7.15E-117 |
| NOVA1    | SSF | 48.60% | 27.90% | 0.28 | 1.67E-116 |
| MFAP4    | SSF | 70.10% | 48.10% | 0.32 | 2.00E-116 |
| NFIA     | SSF | 64.10% | 45.50% | 0.29 | 2.73E-116 |
| FXD1     | SSF | 72.50% | 51.30% | 0.26 | 2.89E-116 |
| CD47     | SSF | 79.20% | 63.20% | 0.27 | 3.39E-116 |
| ZNF106   | SSF | 54.40% | 35.90% | 0.27 | 4.80E-116 |
| SCRG1    | SSF | 51.70% | 30.70% | 0.46 | 5.82E-116 |
| CRISPLD2 | SSF | 41.50% | 21.50% | 0.29 | 2.45E-114 |
| NUCB1    | SSF | 83.30% | 67.10% | 0.25 | 3.23E-114 |
| CD99     | SSF | 98.20% | 94.90% | 0.26 | 1.71E-113 |
| MAP1A    | SSF | 68.40% | 47.30% | 0.27 | 3.50E-113 |
| MEDAG    | SSF | 61.70% | 40.80% | 0.30 | 5.44E-113 |
| CTGF     | SSF | 85.10% | 66.00% | 0.31 | 7.81E-113 |
| CALU     | SSF | 84.40% | 68.90% | 0.27 | 1.09E-112 |
| GOLIM4   | SSF | 74.60% | 58.20% | 0.30 | 5.89E-112 |
| FAM3C    | SSF | 71.70% | 55.20% | 0.27 | 6.65E-111 |
| PLS3     | SSF | 65.80% | 46.10% | 0.27 | 1.09E-110 |
| ABHD2    | SSF | 51.00% | 36.40% | 0.28 | 2.38E-110 |
| SEP11    | SSF | 52.50% | 32.10% | 0.25 | 7.47E-109 |
| RARRES2  | SSF | 21.40% | 7.00%  | 0.34 | 7.51E-107 |
| ZBTB20   | SSF | 56.10% | 38.00% | 0.25 | 1.05E-106 |
| TAX1BP3  | SSF | 63.10% | 46.30% | 0.25 | 1.57E-106 |
| OMD      | SSF | 27.20% | 11.60% | 0.26 | 3.04E-105 |
| CD70     | SSF | 25.30% | 10.00% | 0.26 | 3.92E-105 |
| PLAU     | SSF | 45.90% | 25.20% | 0.30 | 5.39E-104 |
| RASD1    | SSF | 46.10% | 30.70% | 0.46 | 9.25E-103 |
| UBC      | SSF | 99.70% | 99.50% | 0.26 | 1.25E-102 |
| OLFML2B  | SSF | 38.80% | 20.90% | 0.26 | 3.84E-102 |
| GAS1     | SSF | 38.50% | 20.30% | 0.27 | 3.08E-101 |
| HEXA     | SSF | 70.00% | 52.70% | 0.25 | 6.17E-100 |
| TMEM176A | SSF | 37.60% | 26.20% | 0.43 | 3.54E-99  |
| SOX4     | SSF | 72.70% | 54.70% | 0.31 | 1.98E-98  |
| STEAP1   | SSF | 45.80% | 27.60% | 0.26 | 2.74E-98  |
| FAM46A   | SSF | 73.00% | 55.40% | 0.33 | 2.29E-97  |
| LBH      | SSF | 66.20% | 47.00% | 0.28 | 2.83E-96  |
| GAP43    | SSF | 23.40% | 9.60%  | 0.25 | 3.54E-93  |

|           |     |        |        |      |          |
|-----------|-----|--------|--------|------|----------|
| ARID5B    | SSF | 86.10% | 70.30% | 0.26 | 4.94E-90 |
| IRF1      | SSF | 78.70% | 63.80% | 0.32 | 3.28E-89 |
| RBP4      | SSF | 21.30% | 8.40%  | 0.29 | 3.23E-88 |
| PTGDS     | SSF | 27.30% | 16.00% | 0.91 | 9.39E-88 |
| MMP14     | SSF | 50.90% | 35.80% | 0.27 | 1.40E-86 |
| KCNQ1OT1  | SSF | 78.10% | 62.00% | 0.27 | 2.08E-83 |
| GGT5      | SSF | 22.20% | 8.70%  | 0.33 | 5.43E-82 |
| SCARA5    | SSF | 51.60% | 33.30% | 0.28 | 1.91E-81 |
| SOCS3     | SSF | 77.70% | 65.50% | 0.31 | 3.28E-81 |
| CTSL      | SSF | 85.60% | 73.60% | 0.26 | 8.74E-79 |
| IL6       | SSF | 42.80% | 30.30% | 0.66 | 9.38E-77 |
| LTBP4     | SSF | 51.90% | 35.50% | 0.28 | 6.03E-75 |
| FOSB      | SSF | 89.90% | 81.80% | 0.26 | 1.43E-66 |
| ID1       | SSF | 57.00% | 42.20% | 0.31 | 8.79E-66 |
| NTRK2     | SSF | 38.40% | 25.50% | 0.28 | 4.55E-65 |
| FOS       | SSF | 96.60% | 91.10% | 0.28 | 6.32E-63 |
| GADD45B   | SSF | 94.70% | 90.30% | 0.26 | 3.04E-62 |
| ZFP36     | SSF | 94.10% | 90.90% | 0.27 | 6.79E-58 |
| GDF15     | SSF | 14.90% | 6.70%  | 0.28 | 1.83E-51 |
| TMEM176B  | SSF | 40.00% | 30.80% | 0.31 | 1.97E-43 |
| TNFRSF12A | SSF | 67.80% | 60.70% | 0.25 | 7.97E-36 |

**Supplementary Table S1B.** List of differentially expressed genes in osteoarthritic HLA-DRA+ synoviocytes.

| Gene     | Putative cell type of the cluster | The percentage of cells expressing the gene in the cluster | The percentage of cells expressing the gene in the other clusters | Log fold-change of the average expression between the two groups | Adjusted p-value (Bonferroni correction) |
|----------|-----------------------------------|------------------------------------------------------------|-------------------------------------------------------------------|------------------------------------------------------------------|------------------------------------------|
| SEPP1    | IR-M $\phi$                       | 97.30%                                                     | 58.10%                                                            | 1.42                                                             | 7.33E-112                                |
| AIF1     | IR-M $\phi$                       | 99.00%                                                     | 92.50%                                                            | 0.83                                                             | 1.69E-103                                |
| MTRNR2L2 | IR-M $\phi$                       | 96.60%                                                     | 66.30%                                                            | 1.26                                                             | 5.08E-103                                |
| FOLR2    | IR-M $\phi$                       | 95.60%                                                     | 57.00%                                                            | 1.08                                                             | 6.66E-101                                |
| RNASE1   | IR-M $\phi$                       | 98.60%                                                     | 69.00%                                                            | 1.11                                                             | 3.29E-94                                 |
| TXNIP    | IR-M $\phi$                       | 85.70%                                                     | 33.80%                                                            | 1.15                                                             | 4.42E-94                                 |
| C1QC     | IR-M $\phi$                       | 98.60%                                                     | 66.50%                                                            | 0.93                                                             | 4.34E-93                                 |
| PDK4     | IR-M $\phi$                       | 70.10%                                                     | 18.20%                                                            | 1.25                                                             | 3.71E-91                                 |
| C1QA     | IR-M $\phi$                       | 98.80%                                                     | 72.30%                                                            | 0.97                                                             | 1.40E-89                                 |
| MAF      | IR-M $\phi$                       | 77.20%                                                     | 29.40%                                                            | 0.97                                                             | 7.81E-85                                 |
| TGFBI    | IR-M $\phi$                       | 97.50%                                                     | 83.20%                                                            | 0.86                                                             | 6.91E-83                                 |
| FOS      | IR-M $\phi$                       | 98.00%                                                     | 78.20%                                                            | 0.79                                                             | 3.32E-81                                 |
| DAB2     | IR-M $\phi$                       | 91.70%                                                     | 57.90%                                                            | 0.94                                                             | 5.23E-78                                 |
| MTRNR2L1 | IR-M $\phi$                       | 73.30%                                                     | 26.80%                                                            | 1.18                                                             | 3.72E-76                                 |
| TYROBP   | IR-M $\phi$                       | 100.00%                                                    | 97.40%                                                            | 0.51                                                             | 9.92E-76                                 |
| NPC2     | IR-M $\phi$                       | 99.50%                                                     | 97.40%                                                            | 0.62                                                             | 1.39E-75                                 |
| MARCO    | IR-M $\phi$                       | 91.20%                                                     | 57.30%                                                            | 0.98                                                             | 1.27E-70                                 |
| MAFB     | IR-M $\phi$                       | 90.70%                                                     | 59.40%                                                            | 0.86                                                             | 3.93E-68                                 |
| CTSB     | IR-M $\phi$                       | 97.50%                                                     | 81.50%                                                            | 0.74                                                             | 2.52E-66                                 |
| CYBB     | IR-M $\phi$                       | 89.00%                                                     | 57.00%                                                            | 0.79                                                             | 3.36E-65                                 |
| LYVE1    | IR-M $\phi$                       | 74.40%                                                     | 31.20%                                                            | 1.10                                                             | 2.68E-64                                 |
| CD68     | IR-M $\phi$                       | 94.90%                                                     | 80.30%                                                            | 0.70                                                             | 1.26E-63                                 |
| VAMP8    | IR-M $\phi$                       | 94.60%                                                     | 81.20%                                                            | 0.64                                                             | 7.69E-63                                 |
| HPGDS    | IR-M $\phi$                       | 62.60%                                                     | 23.40%                                                            | 0.91                                                             | 1.86E-61                                 |
| SLC40A1  | IR-M $\phi$                       | 66.00%                                                     | 24.00%                                                            | 1.00                                                             | 1.73E-60                                 |
| S100A4   | IR-M $\phi$                       | 100.00%                                                    | 99.90%                                                            | 0.51                                                             | 1.49E-58                                 |
| STAB1    | IR-M $\phi$                       | 80.10%                                                     | 42.80%                                                            | 0.82                                                             | 1.53E-58                                 |
| CFD      | IR-M $\phi$                       | 96.90%                                                     | 81.00%                                                            | 0.64                                                             | 3.30E-58                                 |
| C1QB     | IR-M $\phi$                       | 96.40%                                                     | 68.30%                                                            | 0.81                                                             | 5.70E-58                                 |
| BLVRB    | IR-M $\phi$                       | 84.20%                                                     | 58.20%                                                            | 0.75                                                             | 1.12E-57                                 |
| HSPA1B   | IR-M $\phi$                       | 76.70%                                                     | 37.30%                                                            | 0.83                                                             | 2.70E-57                                 |
| SPI1     | IR-M $\phi$                       | 75.60%                                                     | 43.40%                                                            | 0.79                                                             | 4.23E-57                                 |

|           |             |         |        |      |          |
|-----------|-------------|---------|--------|------|----------|
| FCGRT     | IR-M $\phi$ | 95.20%  | 88.90% | 0.66 | 1.82E-56 |
| MTRNR2L12 | IR-M $\phi$ | 83.90%  | 53.50% | 0.77 | 2.98E-56 |
| CTSD      | IR-M $\phi$ | 92.90%  | 69.40% | 0.74 | 1.07E-55 |
| MTRNR2L8  | IR-M $\phi$ | 83.20%  | 48.00% | 0.73 | 8.24E-55 |
| CD99      | IR-M $\phi$ | 97.30%  | 91.50% | 0.61 | 1.08E-54 |
| EMB       | IR-M $\phi$ | 76.20%  | 42.70% | 0.78 | 1.42E-53 |
| LGMIN     | IR-M $\phi$ | 85.20%  | 59.40% | 0.88 | 4.05E-52 |
| DUSP1     | IR-M $\phi$ | 87.90%  | 72.60% | 0.81 | 1.98E-51 |
| HSPB1     | IR-M $\phi$ | 94.10%  | 74.50% | 0.68 | 5.89E-51 |
| GPR34     | IR-M $\phi$ | 59.30%  | 21.00% | 0.75 | 1.16E-50 |
| ARPC3     | IR-M $\phi$ | 97.50%  | 93.00% | 0.48 | 6.82E-50 |
| FRMD4B    | IR-M $\phi$ | 75.40%  | 40.90% | 0.64 | 1.17E-49 |
| CYBA      | IR-M $\phi$ | 99.50%  | 97.00% | 0.45 | 1.34E-49 |
| LAPTM5    | IR-M $\phi$ | 98.00%  | 95.10% | 0.49 | 4.53E-48 |
| ITM2B     | IR-M $\phi$ | 99.70%  | 97.50% | 0.44 | 1.20E-47 |
| PMP22     | IR-M $\phi$ | 79.60%  | 47.70% | 0.71 | 1.41E-47 |
| PYCARD    | IR-M $\phi$ | 81.70%  | 56.60% | 0.61 | 1.90E-47 |
| ACTB      | IR-M $\phi$ | 100.00% | 99.90% | 0.44 | 2.69E-47 |
| COLEC12   | IR-M $\phi$ | 65.90%  | 29.70% | 0.67 | 3.16E-47 |
| PLTP      | IR-M $\phi$ | 78.60%  | 48.30% | 0.88 | 9.79E-47 |
| LILRB5    | IR-M $\phi$ | 67.90%  | 31.60% | 0.65 | 1.36E-46 |
| F13A1     | IR-M $\phi$ | 73.00%  | 40.10% | 0.96 | 3.26E-46 |
| HSPA1A    | IR-M $\phi$ | 83.70%  | 59.50% | 0.85 | 4.10E-46 |
| TSC22D3   | IR-M $\phi$ | 87.30%  | 62.30% | 0.60 | 4.23E-46 |
| ARHGAP18  | IR-M $\phi$ | 75.00%  | 43.70% | 0.62 | 2.59E-45 |
| CD14      | IR-M $\phi$ | 93.50%  | 71.90% | 0.61 | 1.72E-44 |
| TSPO      | IR-M $\phi$ | 97.10%  | 92.00% | 0.48 | 5.34E-44 |
| JUN       | IR-M $\phi$ | 92.50%  | 79.10% | 0.64 | 2.31E-42 |
| RBPJ      | IR-M $\phi$ | 89.30%  | 72.40% | 0.56 | 2.37E-42 |
| VSIG4     | IR-M $\phi$ | 90.30%  | 75.40% | 0.63 | 5.03E-42 |
| ME1       | IR-M $\phi$ | 47.20%  | 13.70% | 0.58 | 5.53E-41 |
| SNX2      | IR-M $\phi$ | 71.60%  | 43.70% | 0.60 | 7.75E-41 |
| CSF1R     | IR-M $\phi$ | 72.80%  | 41.70% | 0.60 | 2.72E-40 |
| NCF1      | IR-M $\phi$ | 74.40%  | 43.60% | 0.79 | 4.37E-40 |
| ADAP2     | IR-M $\phi$ | 53.30%  | 20.50% | 0.61 | 5.66E-39 |
| RHOB      | IR-M $\phi$ | 67.60%  | 35.20% | 0.66 | 1.09E-38 |
| BLVRA     | IR-M $\phi$ | 60.60%  | 28.60% | 0.60 | 1.46E-38 |
| CTSZ      | IR-M $\phi$ | 94.60%  | 83.70% | 0.58 | 1.52E-38 |
| C4orf48   | IR-M $\phi$ | 46.00%  | 15.20% | 0.61 | 9.42E-38 |
| FCER1G    | IR-M $\phi$ | 99.20%  | 96.10% | 0.40 | 3.09E-37 |
| ALOX5AP   | IR-M $\phi$ | 87.30%  | 67.90% | 0.55 | 3.35E-37 |

|          |             |         |         |      |          |
|----------|-------------|---------|---------|------|----------|
| ALDH1A1  | IR-M $\phi$ | 55.00%  | 21.30%  | 0.64 | 4.65E-37 |
| MAMDC2   | IR-M $\phi$ | 72.30%  | 40.40%  | 0.59 | 1.06E-36 |
| LTC4S    | IR-M $\phi$ | 56.70%  | 24.60%  | 0.63 | 2.70E-36 |
| S100A6   | IR-M $\phi$ | 100.00% | 99.70%  | 0.45 | 4.93E-36 |
| MS4A7    | IR-M $\phi$ | 79.10%  | 55.00%  | 0.59 | 5.19E-36 |
| CTSS     | IR-M $\phi$ | 95.90%  | 92.30%  | 0.48 | 1.96E-35 |
| PSAP     | IR-M $\phi$ | 99.20%  | 97.30%  | 0.43 | 2.28E-35 |
| YBX1     | IR-M $\phi$ | 95.80%  | 88.90%  | 0.49 | 3.37E-35 |
| COMT     | IR-M $\phi$ | 84.20%  | 65.00%  | 0.51 | 2.11E-34 |
| CD163    | IR-M $\phi$ | 79.10%  | 50.30%  | 0.51 | 5.77E-34 |
| SNX6     | IR-M $\phi$ | 66.00%  | 39.60%  | 0.58 | 1.20E-33 |
| HNMT     | IR-M $\phi$ | 69.80%  | 43.60%  | 0.57 | 6.63E-33 |
| RHOA     | IR-M $\phi$ | 93.90%  | 91.90%  | 0.41 | 7.80E-33 |
| MS4A4A   | IR-M $\phi$ | 67.70%  | 39.10%  | 0.58 | 9.40E-33 |
| PLD3     | IR-M $\phi$ | 75.70%  | 56.30%  | 0.65 | 2.45E-32 |
| ANXA4    | IR-M $\phi$ | 73.00%  | 47.50%  | 0.60 | 2.62E-32 |
| ZFP36L2  | IR-M $\phi$ | 78.10%  | 50.60%  | 0.53 | 4.28E-32 |
| RNF130   | IR-M $\phi$ | 85.90%  | 72.40%  | 0.48 | 6.33E-32 |
| TMEM176B | IR-M $\phi$ | 66.90%  | 37.40%  | 0.65 | 8.29E-32 |
| HSP90AA1 | IR-M $\phi$ | 98.00%  | 93.30%  | 0.48 | 1.18E-31 |
| GIMAP4   | IR-M $\phi$ | 36.30%  | 9.20%   | 0.45 | 4.55E-31 |
| PEPD     | IR-M $\phi$ | 67.10%  | 44.50%  | 0.65 | 5.32E-31 |
| MEF2C    | IR-M $\phi$ | 68.90%  | 42.70%  | 0.55 | 1.27E-30 |
| MS4A6A   | IR-M $\phi$ | 95.90%  | 86.70%  | 0.43 | 4.88E-30 |
| GRN      | IR-M $\phi$ | 93.50%  | 88.00%  | 0.46 | 7.59E-30 |
| ACP5     | IR-M $\phi$ | 65.40%  | 38.10%  | 0.62 | 2.39E-29 |
| SH3BGRL  | IR-M $\phi$ | 90.30%  | 79.90%  | 0.43 | 1.22E-28 |
| MPEG1    | IR-M $\phi$ | 54.70%  | 27.00%  | 0.53 | 2.00E-28 |
| ARPC4    | IR-M $\phi$ | 72.50%  | 51.40%  | 0.51 | 2.21E-28 |
| MT-ND2   | IR-M $\phi$ | 99.70%  | 100.00% | 0.32 | 4.21E-28 |
| CST3     | IR-M $\phi$ | 100.00% | 99.20%  | 0.36 | 1.15E-27 |
| CREG1    | IR-M $\phi$ | 64.30%  | 39.60%  | 0.55 | 1.36E-27 |
| NUPR1    | IR-M $\phi$ | 68.80%  | 40.90%  | 0.58 | 2.22E-27 |
| GPNMB    | IR-M $\phi$ | 77.40%  | 51.20%  | 0.49 | 4.56E-27 |
| TNS1     | IR-M $\phi$ | 62.00%  | 35.40%  | 0.49 | 4.17E-26 |
| ZFP36L1  | IR-M $\phi$ | 93.20%  | 83.60%  | 0.44 | 9.60E-26 |
| KLF2     | IR-M $\phi$ | 44.80%  | 18.50%  | 0.53 | 1.43E-25 |
| CHCHD10  | IR-M $\phi$ | 39.60%  | 13.80%  | 0.45 | 2.81E-25 |
| HSP90B1  | IR-M $\phi$ | 83.70%  | 71.10%  | 0.54 | 3.58E-25 |
| C2       | IR-M $\phi$ | 50.30%  | 24.10%  | 0.52 | 1.69E-24 |
| ARHGDI3  | IR-M $\phi$ | 84.70%  | 72.30%  | 0.42 | 2.01E-24 |

|           |             |         |         |      |          |
|-----------|-------------|---------|---------|------|----------|
| FTL       | IR-M $\phi$ | 100.00% | 100.00% | 0.30 | 2.56E-24 |
| SCN9A     | IR-M $\phi$ | 33.10%  | 9.80%   | 0.44 | 2.63E-24 |
| UCP2      | IR-M $\phi$ | 61.00%  | 36.80%  | 0.48 | 2.83E-24 |
| ACTG1     | IR-M $\phi$ | 98.80%  | 96.30%  | 0.31 | 7.37E-24 |
| GIMAP7    | IR-M $\phi$ | 28.20%  | 6.50%   | 0.42 | 7.43E-24 |
| UNC93B1   | IR-M $\phi$ | 45.20%  | 19.50%  | 0.43 | 1.14E-23 |
| CAPZA2    | IR-M $\phi$ | 78.10%  | 63.60%  | 0.45 | 1.29E-23 |
| SIGLEC1   | IR-M $\phi$ | 32.60%  | 9.50%   | 0.43 | 1.77E-23 |
| DNAJB1    | IR-M $\phi$ | 80.80%  | 64.50%  | 0.61 | 1.98E-23 |
| KCTD12    | IR-M $\phi$ | 73.00%  | 50.70%  | 0.45 | 2.96E-23 |
| TMEM37    | IR-M $\phi$ | 24.60%  | 4.80%   | 0.32 | 3.37E-23 |
| GLUL      | IR-M $\phi$ | 90.50%  | 79.40%  | 0.36 | 4.25E-23 |
| LAMTOR4   | IR-M $\phi$ | 85.90%  | 74.80%  | 0.38 | 9.20E-23 |
| SERPINF1  | IR-M $\phi$ | 72.00%  | 51.60%  | 0.43 | 1.02E-22 |
| CAP1      | IR-M $\phi$ | 83.90%  | 72.30%  | 0.42 | 1.58E-22 |
| ATP5D     | IR-M $\phi$ | 51.10%  | 27.20%  | 0.47 | 2.75E-22 |
| LAMP1     | IR-M $\phi$ | 65.90%  | 44.60%  | 0.51 | 3.38E-22 |
| MSR1      | IR-M $\phi$ | 75.60%  | 56.30%  | 0.46 | 9.31E-22 |
| MCOLN1    | IR-M $\phi$ | 45.50%  | 21.40%  | 0.45 | 1.05E-21 |
| CYTH4     | IR-M $\phi$ | 36.70%  | 13.40%  | 0.43 | 1.52E-21 |
| ARRB2     | IR-M $\phi$ | 68.40%  | 48.50%  | 0.44 | 1.54E-21 |
| TCEAL4    | IR-M $\phi$ | 57.00%  | 34.10%  | 0.48 | 2.01E-21 |
| CALM2     | IR-M $\phi$ | 96.90%  | 93.90%  | 0.37 | 2.22E-21 |
| GMFG      | IR-M $\phi$ | 82.50%  | 72.90%  | 0.43 | 3.44E-21 |
| CALM3     | IR-M $\phi$ | 53.30%  | 30.20%  | 0.48 | 4.12E-21 |
| GAS6      | IR-M $\phi$ | 50.10%  | 25.30%  | 0.49 | 5.11E-21 |
| ATP5I     | IR-M $\phi$ | 82.30%  | 69.40%  | 0.39 | 6.19E-21 |
| SLCO2B1   | IR-M $\phi$ | 48.20%  | 22.60%  | 0.42 | 9.06E-21 |
| FOSB      | IR-M $\phi$ | 85.70%  | 78.50%  | 0.47 | 1.74E-20 |
| P2RY14    | IR-M $\phi$ | 34.00%  | 12.40%  | 0.52 | 6.20E-20 |
| ATP5H     | IR-M $\phi$ | 79.50%  | 66.70%  | 0.39 | 7.32E-20 |
| C10orf118 | IR-M $\phi$ | 46.50%  | 24.10%  | 0.51 | 1.28E-19 |
| EMP1      | IR-M $\phi$ | 88.30%  | 76.30%  | 0.43 | 1.58E-19 |
| MT-ND5    | IR-M $\phi$ | 98.60%  | 98.70%  | 0.33 | 2.46E-19 |
| AP2S1     | IR-M $\phi$ | 72.70%  | 56.60%  | 0.45 | 3.88E-19 |
| RIN2      | IR-M $\phi$ | 41.90%  | 19.60%  | 0.45 | 6.82E-19 |
| DAAM1     | IR-M $\phi$ | 48.90%  | 26.50%  | 0.42 | 1.41E-18 |
| MAN1A1    | IR-M $\phi$ | 53.70%  | 31.40%  | 0.48 | 2.68E-18 |
| KLF4      | IR-M $\phi$ | 82.70%  | 63.60%  | 0.32 | 4.08E-18 |
| PTPN6     | IR-M $\phi$ | 39.90%  | 18.60%  | 0.41 | 5.42E-18 |
| RENBP     | IR-M $\phi$ | 40.20%  | 18.20%  | 0.41 | 5.90E-18 |

|               |       |        |        |      |          |
|---------------|-------|--------|--------|------|----------|
| GNAS          | IR-MΦ | 85.10% | 74.30% | 0.40 | 7.89E-18 |
| GNAI2         | IR-MΦ | 79.50% | 65.50% | 0.37 | 9.22E-18 |
| DHRS7         | IR-MΦ | 63.80% | 44.00% | 0.40 | 9.99E-18 |
| PFN1          | IR-MΦ | 98.30% | 98.30% | 0.30 | 1.13E-17 |
| ITGAM         | IR-MΦ | 57.00% | 35.50% | 0.46 | 1.26E-17 |
| RAB13         | IR-MΦ | 65.00% | 46.20% | 0.39 | 2.08E-17 |
| MT-ND3        | IR-MΦ | 99.80% | 99.70% | 0.26 | 2.31E-17 |
| MT-ND4L       | IR-MΦ | 88.60% | 81.40% | 0.38 | 3.32E-17 |
| GNG11         | IR-MΦ | 42.10% | 20.50% | 0.44 | 3.48E-17 |
| TIMD4         | IR-MΦ | 32.90% | 12.50% | 0.45 | 6.78E-17 |
| ECM1          | IR-MΦ | 52.10% | 29.90% | 0.39 | 8.41E-17 |
| PARVB         | IR-MΦ | 44.50% | 21.80% | 0.34 | 1.10E-16 |
| ATPIF1        | IR-MΦ | 72.70% | 55.20% | 0.35 | 1.41E-16 |
| NCF4          | IR-MΦ | 49.40% | 28.90% | 0.41 | 1.41E-16 |
| CTD-2337J16.1 | IR-MΦ | 36.80% | 15.90% | 0.41 | 1.58E-16 |
| S100A10       | IR-MΦ | 99.50% | 99.50% | 0.37 | 2.61E-16 |
| IFI16         | IR-MΦ | 65.20% | 45.70% | 0.40 | 3.97E-16 |
| 7SK.2         | IR-MΦ | 33.30% | 14.20% | 0.58 | 8.68E-16 |
| RNF150        | IR-MΦ | 21.20% | 4.90%  | 0.26 | 9.99E-16 |
| HSBP1         | IR-MΦ | 69.30% | 52.00% | 0.38 | 1.09E-15 |
| SLA           | IR-MΦ | 33.10% | 13.40% | 0.35 | 1.11E-15 |
| COX6B1        | IR-MΦ | 90.30% | 86.30% | 0.30 | 1.27E-15 |
| RP11-108M9.4  | IR-MΦ | 26.10% | 8.50%  | 0.33 | 2.20E-15 |
| COX5B         | IR-MΦ | 86.20% | 76.30% | 0.31 | 2.33E-15 |
| NUCKS1        | IR-MΦ | 70.80% | 53.00% | 0.35 | 4.34E-15 |
| AP1B1         | IR-MΦ | 54.70% | 35.00% | 0.38 | 5.21E-15 |
| SERPINB6      | IR-MΦ | 52.30% | 32.50% | 0.37 | 5.52E-15 |
| SLC48A1       | IR-MΦ | 28.50% | 10.30% | 0.32 | 5.85E-15 |
| MFSD1         | IR-MΦ | 72.30% | 56.40% | 0.33 | 8.00E-15 |
| PET100        | IR-MΦ | 69.10% | 52.90% | 0.36 | 1.01E-14 |
| CANX          | IR-MΦ | 73.70% | 62.20% | 0.36 | 1.06E-14 |
| LAMP2         | IR-MΦ | 64.50% | 46.80% | 0.36 | 1.14E-14 |
| CMKLR1        | IR-MΦ | 28.20% | 10.20% | 0.32 | 1.42E-14 |
| DOK2          | IR-MΦ | 60.80% | 40.80% | 0.38 | 1.46E-14 |
| FAM105A       | IR-MΦ | 43.80% | 23.60% | 0.38 | 1.46E-14 |
| TMEM230       | IR-MΦ | 59.30% | 40.40% | 0.36 | 1.57E-14 |
| PRSS36        | IR-MΦ | 20.20% | 4.90%  | 0.27 | 1.72E-14 |
| C3AR1         | IR-MΦ | 56.40% | 35.60% | 0.39 | 1.78E-14 |
| C21orf33      | IR-MΦ | 31.60% | 13.20% | 0.35 | 2.01E-14 |
| PLEC          | IR-MΦ | 62.50% | 44.00% | 0.42 | 2.14E-14 |

|           |             |        |        |      |          |
|-----------|-------------|--------|--------|------|----------|
| UQCR11.1  | IR-M $\phi$ | 79.30% | 73.50% | 0.34 | 2.47E-14 |
| TSPAN4    | IR-M $\phi$ | 57.60% | 38.80% | 0.42 | 2.48E-14 |
| ASAH1     | IR-M $\phi$ | 67.10% | 52.10% | 0.41 | 2.53E-14 |
| TNFAIP8L2 | IR-M $\phi$ | 20.40% | 5.30%  | 0.27 | 2.73E-14 |
| SRSF7     | IR-M $\phi$ | 65.70% | 47.50% | 0.35 | 3.61E-14 |
| THEMIS2   | IR-M $\phi$ | 36.50% | 17.30% | 0.34 | 3.95E-14 |
| GIMAP1    | IR-M $\phi$ | 23.80% | 7.50%  | 0.32 | 4.64E-14 |
| SYF2      | IR-M $\phi$ | 63.50% | 48.90% | 0.44 | 5.13E-14 |
| NPL       | IR-M $\phi$ | 29.50% | 11.60% | 0.30 | 5.91E-14 |
| HMGB1     | IR-M $\phi$ | 94.20% | 91.10% | 0.29 | 6.52E-14 |
| OSTF1     | IR-M $\phi$ | 55.50% | 38.20% | 0.36 | 7.50E-14 |
| FUCA1     | IR-M $\phi$ | 35.70% | 16.60% | 0.39 | 8.44E-14 |
| TMBIM1    | IR-M $\phi$ | 55.90% | 37.20% | 0.37 | 9.07E-14 |
| SRSF3     | IR-M $\phi$ | 78.60% | 68.50% | 0.34 | 1.23E-13 |
| RCSD1     | IR-M $\phi$ | 38.40% | 18.70% | 0.32 | 1.29E-13 |
| 1-Mar     | IR-M $\phi$ | 38.20% | 18.70% | 0.33 | 1.30E-13 |
| SELPLG    | IR-M $\phi$ | 32.10% | 13.90% | 0.34 | 1.39E-13 |
| TRA2B     | IR-M $\phi$ | 76.70% | 65.30% | 0.42 | 1.96E-13 |
| RGS10     | IR-M $\phi$ | 81.80% | 72.10% | 0.33 | 2.45E-13 |
| YWHAH     | IR-M $\phi$ | 46.30% | 26.70% | 0.36 | 2.52E-13 |
| HES1      | IR-M $\phi$ | 48.00% | 27.90% | 0.46 | 2.55E-13 |
| C6orf1    | IR-M $\phi$ | 28.50% | 11.40% | 0.31 | 2.91E-13 |
| TMEM219   | IR-M $\phi$ | 61.00% | 44.00% | 0.33 | 2.95E-13 |
| NTAN1     | IR-M $\phi$ | 42.30% | 23.00% | 0.34 | 3.66E-13 |
| PLA2G15   | IR-M $\phi$ | 25.60% | 9.20%  | 0.31 | 4.18E-13 |
| GATM      | IR-M $\phi$ | 36.70% | 17.40% | 0.32 | 4.85E-13 |
| PTMS      | IR-M $\phi$ | 52.60% | 34.20% | 0.37 | 6.66E-13 |
| ARHGAP30  | IR-M $\phi$ | 42.40% | 23.20% | 0.35 | 8.46E-13 |
| TCN2      | IR-M $\phi$ | 42.30% | 23.40% | 0.38 | 8.62E-13 |
| SESN1     | IR-M $\phi$ | 22.10% | 7.00%  | 0.33 | 1.09E-12 |
| BST2      | IR-M $\phi$ | 72.50% | 61.50% | 0.30 | 1.10E-12 |
| FPR3      | IR-M $\phi$ | 64.20% | 46.70% | 0.38 | 1.13E-12 |
| CNBP      | IR-M $\phi$ | 72.20% | 59.50% | 0.34 | 1.53E-12 |
| GYPC      | IR-M $\phi$ | 54.70% | 36.90% | 0.39 | 1.57E-12 |
| ZRSR2     | IR-M $\phi$ | 23.80% | 8.10%  | 0.29 | 2.11E-12 |
| ATP6V0E1  | IR-M $\phi$ | 85.10% | 75.70% | 0.29 | 2.68E-12 |
| COMMD3    | IR-M $\phi$ | 38.90% | 20.40% | 0.32 | 3.32E-12 |
| IFI30     | IR-M $\phi$ | 49.40% | 29.70% | 0.34 | 4.46E-12 |
| HEXIM1    | IR-M $\phi$ | 67.60% | 53.80% | 0.42 | 7.75E-12 |
| DSC2      | IR-M $\phi$ | 25.00% | 9.20%  | 0.27 | 8.43E-12 |
| CALR      | IR-M $\phi$ | 86.10% | 81.30% | 0.37 | 8.62E-12 |



|          |             |        |        |      |          |
|----------|-------------|--------|--------|------|----------|
| FKBP5    | IR-M $\phi$ | 45.50% | 27.50% | 0.36 | 8.68E-12 |
| NEU1     | IR-M $\phi$ | 63.00% | 45.70% | 0.31 | 9.04E-12 |
| TCEB2    | IR-M $\phi$ | 85.60% | 77.30% | 0.27 | 9.77E-12 |
| NDUFB1   | IR-M $\phi$ | 73.90% | 65.00% | 0.33 | 1.01E-11 |
| RGL1     | IR-M $\phi$ | 33.60% | 16.00% | 0.33 | 1.03E-11 |
| MERTK    | IR-M $\phi$ | 27.80% | 11.20% | 0.29 | 1.03E-11 |
| PTPN18   | IR-M $\phi$ | 35.30% | 17.80% | 0.34 | 1.29E-11 |
| GIMAP2   | IR-M $\phi$ | 20.00% | 5.90%  | 0.27 | 1.40E-11 |
| MYL12A   | IR-M $\phi$ | 91.30% | 87.60% | 0.25 | 1.56E-11 |
| PPT1     | IR-M $\phi$ | 76.40% | 64.10% | 0.32 | 1.63E-11 |
| EPHX1    | IR-M $\phi$ | 44.10% | 26.20% | 0.36 | 2.10E-11 |
| SNCA     | IR-M $\phi$ | 43.10% | 25.80% | 0.36 | 2.24E-11 |
| FCGR2B   | IR-M $\phi$ | 78.10% | 63.20% | 0.36 | 2.32E-11 |
| HOXB7    | IR-M $\phi$ | 18.70% | 5.20%  | 0.25 | 2.42E-11 |
| ATP5G2   | IR-M $\phi$ | 85.40% | 80.30% | 0.27 | 2.97E-11 |
| COX6A1   | IR-M $\phi$ | 83.00% | 77.00% | 0.30 | 3.37E-11 |
| UQCRCQ   | IR-M $\phi$ | 77.10% | 69.30% | 0.29 | 5.37E-11 |
| A2M      | IR-M $\phi$ | 52.80% | 35.00% | 0.39 | 5.51E-11 |
| TGFBR2   | IR-M $\phi$ | 40.10% | 23.00% | 0.32 | 5.84E-11 |
| ITSN1    | IR-M $\phi$ | 23.80% | 8.60%  | 0.28 | 6.75E-11 |
| TPM3     | IR-M $\phi$ | 87.90% | 82.20% | 0.28 | 7.15E-11 |
| CD59     | IR-M $\phi$ | 67.10% | 54.10% | 0.38 | 8.61E-11 |
| GAA      | IR-M $\phi$ | 50.80% | 33.50% | 0.32 | 1.10E-10 |
| SEC62    | IR-M $\phi$ | 77.60% | 66.70% | 0.30 | 1.37E-10 |
| TMEM160  | IR-M $\phi$ | 45.00% | 27.00% | 0.30 | 1.49E-10 |
| CRYL1    | IR-M $\phi$ | 39.40% | 22.70% | 0.34 | 1.54E-10 |
| MNDA     | IR-M $\phi$ | 56.00% | 38.80% | 0.34 | 2.09E-10 |
| CLEC12A  | IR-M $\phi$ | 40.70% | 23.10% | 0.33 | 2.65E-10 |
| ARPC1B   | IR-M $\phi$ | 90.00% | 86.70% | 0.25 | 2.84E-10 |
| ATP6VOB  | IR-M $\phi$ | 88.10% | 84.90% | 0.30 | 3.27E-10 |
| IFI27L2  | IR-M $\phi$ | 64.90% | 52.10% | 0.34 | 3.60E-10 |
| FXVD6    | IR-M $\phi$ | 31.90% | 15.90% | 0.37 | 5.37E-10 |
| SAP18    | IR-M $\phi$ | 90.30% | 87.40% | 0.31 | 5.76E-10 |
| PLXND1   | IR-M $\phi$ | 39.20% | 22.20% | 0.32 | 6.03E-10 |
| TMEM176A | IR-M $\phi$ | 44.80% | 27.20% | 0.37 | 6.21E-10 |
| TMED9    | IR-M $\phi$ | 64.50% | 51.00% | 0.33 | 7.37E-10 |
| FAM96A   | IR-M $\phi$ | 43.80% | 27.00% | 0.31 | 7.94E-10 |
| RPS27L   | IR-M $\phi$ | 77.60% | 68.10% | 0.30 | 8.25E-10 |
| CCR1     | IR-M $\phi$ | 33.60% | 17.00% | 0.31 | 8.49E-10 |
| DYNC112  | IR-M $\phi$ | 55.30% | 39.90% | 0.34 | 8.65E-10 |
| CIR1     | IR-M $\phi$ | 34.30% | 17.50% | 0.27 | 9.11E-10 |

|          |       |        |        |      |          |
|----------|-------|--------|--------|------|----------|
| CD4      | IR-MΦ | 62.00% | 45.50% | 0.31 | 9.42E-10 |
| CTSC     | IR-MΦ | 52.10% | 36.90% | 0.36 | 1.31E-09 |
| RNF13    | IR-MΦ | 62.30% | 47.50% | 0.34 | 1.64E-09 |
| FYB      | IR-MΦ | 51.60% | 35.00% | 0.33 | 1.72E-09 |
| TMEM179B | IR-MΦ | 45.50% | 28.50% | 0.31 | 1.75E-09 |
| TMEM14C  | IR-MΦ | 69.30% | 60.10% | 0.33 | 1.76E-09 |
| SCP2     | IR-MΦ | 64.00% | 49.90% | 0.28 | 1.77E-09 |
| TTC7A    | IR-MΦ | 28.40% | 13.20% | 0.28 | 1.82E-09 |
| LAMTOR1  | IR-MΦ | 54.50% | 39.50% | 0.31 | 2.18E-09 |
| EVI2B    | IR-MΦ | 60.10% | 45.40% | 0.33 | 2.25E-09 |
| MYADM    | IR-MΦ | 76.70% | 63.50% | 0.27 | 2.67E-09 |
| RGS19    | IR-MΦ | 40.10% | 23.00% | 0.29 | 2.72E-09 |
| PEBP1    | IR-MΦ | 71.30% | 61.80% | 0.30 | 3.19E-09 |
| VAT1     | IR-MΦ | 42.30% | 25.80% | 0.32 | 3.39E-09 |
| RAB11A   | IR-MΦ | 51.10% | 35.20% | 0.29 | 3.55E-09 |
| SYNGR2   | IR-MΦ | 54.20% | 38.80% | 0.30 | 3.56E-09 |
| SLC9A9   | IR-MΦ | 30.10% | 14.20% | 0.26 | 4.46E-09 |
| DUSP23   | IR-MΦ | 50.40% | 34.80% | 0.33 | 4.68E-09 |
| COCH     | IR-MΦ | 20.00% | 7.10%  | 0.32 | 5.77E-09 |
| TTC1     | IR-MΦ | 38.90% | 22.30% | 0.27 | 5.88E-09 |
| COLGALT1 | IR-MΦ | 35.50% | 20.10% | 0.32 | 7.36E-09 |
| NDUFB7   | IR-MΦ | 66.20% | 54.30% | 0.34 | 7.77E-09 |
| EVI2A    | IR-MΦ | 50.30% | 36.40% | 0.36 | 1.02E-08 |
| CSK      | IR-MΦ | 26.80% | 12.30% | 0.27 | 1.04E-08 |
| HEXB     | IR-MΦ | 71.10% | 63.10% | 0.28 | 1.07E-08 |
| ADAM9    | IR-MΦ | 47.40% | 31.10% | 0.29 | 1.23E-08 |
| BRI3     | IR-MΦ | 45.00% | 29.40% | 0.33 | 1.24E-08 |
| CRIP1    | IR-MΦ | 87.90% | 79.90% | 0.28 | 1.26E-08 |
| LAMTOR2  | IR-MΦ | 58.10% | 44.80% | 0.31 | 1.35E-08 |
| LSM4     | IR-MΦ | 46.70% | 31.20% | 0.31 | 1.67E-08 |
| HEBP1    | IR-MΦ | 33.60% | 18.70% | 0.29 | 2.48E-08 |
| ARL6IP4  | IR-MΦ | 76.20% | 71.70% | 0.27 | 2.57E-08 |
| ABCA6    | IR-MΦ | 15.40% | 4.50%  | 0.25 | 2.92E-08 |
| PLXNB2   | IR-MΦ | 38.70% | 22.50% | 0.30 | 3.07E-08 |
| DPYSL3   | IR-MΦ | 44.70% | 29.50% | 0.34 | 3.53E-08 |
| NISCH    | IR-MΦ | 30.40% | 15.60% | 0.29 | 3.56E-08 |
| GAS7     | IR-MΦ | 47.50% | 31.70% | 0.29 | 4.10E-08 |
| STX7     | IR-MΦ | 41.80% | 26.60% | 0.29 | 4.24E-08 |
| SNX3     | IR-MΦ | 71.00% | 62.80% | 0.25 | 4.52E-08 |
| WASH4P   | IR-MΦ | 35.80% | 20.50% | 0.27 | 5.32E-08 |
| PPDPF    | IR-MΦ | 80.10% | 71.40% | 0.26 | 6.52E-08 |

|               |             |        |        |      |          |
|---------------|-------------|--------|--------|------|----------|
| SLC7A8        | IR-M $\phi$ | 27.20% | 13.00% | 0.29 | 6.92E-08 |
| NDUFA13       | IR-M $\phi$ | 70.60% | 61.40% | 0.31 | 7.57E-08 |
| SLC7A7        | IR-M $\phi$ | 41.60% | 26.10% | 0.26 | 8.64E-08 |
| FRMD4A        | IR-M $\phi$ | 22.20% | 9.40%  | 0.26 | 8.76E-08 |
| VPS28         | IR-M $\phi$ | 60.30% | 49.00% | 0.29 | 8.88E-08 |
| PRDX5         | IR-M $\phi$ | 70.60% | 61.90% | 0.27 | 9.38E-08 |
| CISD3         | IR-M $\phi$ | 32.60% | 18.20% | 0.30 | 9.78E-08 |
| IDH1          | IR-M $\phi$ | 34.00% | 18.70% | 0.25 | 1.01E-07 |
| NDUFA3        | IR-M $\phi$ | 44.70% | 30.50% | 0.33 | 1.02E-07 |
| TM9SF2        | IR-M $\phi$ | 41.90% | 28.00% | 0.33 | 1.03E-07 |
| AES           | IR-M $\phi$ | 47.40% | 33.80% | 0.32 | 1.15E-07 |
| BLOC1S1       | IR-M $\phi$ | 67.10% | 57.20% | 0.28 | 1.15E-07 |
| ST13          | IR-M $\phi$ | 72.20% | 64.30% | 0.28 | 1.23E-07 |
| ISCU          | IR-M $\phi$ | 60.10% | 45.70% | 0.28 | 1.41E-07 |
| SAMHD1        | IR-M $\phi$ | 58.60% | 44.50% | 0.30 | 1.57E-07 |
| AP2A2         | IR-M $\phi$ | 46.50% | 30.80% | 0.30 | 1.57E-07 |
| MT-ATP8       | IR-M $\phi$ | 42.10% | 26.70% | 0.29 | 1.59E-07 |
| SSB           | IR-M $\phi$ | 52.50% | 39.70% | 0.29 | 1.60E-07 |
| DYNLRB1       | IR-M $\phi$ | 64.30% | 52.30% | 0.27 | 1.74E-07 |
| CCDC85B       | IR-M $\phi$ | 53.00% | 38.60% | 0.29 | 1.76E-07 |
| PDIA6         | IR-M $\phi$ | 58.70% | 47.40% | 0.33 | 1.77E-07 |
| RAB5C         | IR-M $\phi$ | 73.00% | 63.70% | 0.27 | 2.06E-07 |
| SLC35F6       | IR-M $\phi$ | 24.30% | 11.10% | 0.25 | 2.22E-07 |
| RP11-290F20.3 | IR-M $\phi$ | 33.40% | 18.30% | 0.29 | 2.36E-07 |
| CNPY3         | IR-M $\phi$ | 43.50% | 29.80% | 0.30 | 2.53E-07 |
| CLTA          | IR-M $\phi$ | 67.60% | 56.50% | 0.29 | 2.68E-07 |
| NRP1          | IR-M $\phi$ | 38.50% | 22.70% | 0.27 | 2.79E-07 |
| GSTT1         | IR-M $\phi$ | 28.20% | 14.20% | 0.26 | 2.97E-07 |
| PDIA3         | IR-M $\phi$ | 79.30% | 73.80% | 0.29 | 3.10E-07 |
| NUP214        | IR-M $\phi$ | 37.90% | 23.90% | 0.31 | 3.45E-07 |
| ANAPC11       | IR-M $\phi$ | 64.20% | 52.30% | 0.27 | 3.66E-07 |
| FCGBP         | IR-M $\phi$ | 14.80% | 4.40%  | 0.32 | 3.68E-07 |
| KLF9          | IR-M $\phi$ | 41.60% | 27.10% | 0.29 | 4.76E-07 |
| APH1A         | IR-M $\phi$ | 50.80% | 37.70% | 0.28 | 5.57E-07 |
| EID1          | IR-M $\phi$ | 68.90% | 57.30% | 0.27 | 6.40E-07 |
| LFNG          | IR-M $\phi$ | 22.40% | 9.90%  | 0.25 | 6.40E-07 |
| FCGR2A        | IR-M $\phi$ | 83.20% | 77.30% | 0.29 | 6.72E-07 |
| FCGR3A        | IR-M $\phi$ | 53.50% | 39.60% | 0.45 | 7.57E-07 |
| MGST2         | IR-M $\phi$ | 36.50% | 22.50% | 0.28 | 8.45E-07 |
| LINC00998     | IR-M $\phi$ | 42.60% | 28.40% | 0.26 | 9.59E-07 |
| PPCS          | IR-M $\phi$ | 35.00% | 21.30% | 0.28 | 1.04E-06 |

|         |             |        |        |      |          |
|---------|-------------|--------|--------|------|----------|
| PSME1   | IR-M $\phi$ | 74.40% | 65.50% | 0.27 | 1.06E-06 |
| LRP1    | IR-M $\phi$ | 60.40% | 47.20% | 0.27 | 1.23E-06 |
| AKR1B1  | IR-M $\phi$ | 55.90% | 43.50% | 0.29 | 1.28E-06 |
| SUMF2   | IR-M $\phi$ | 41.10% | 26.20% | 0.26 | 1.30E-06 |
| XIST    | IR-M $\phi$ | 69.90% | 52.80% | 0.29 | 1.35E-06 |
| BANF1   | IR-M $\phi$ | 54.20% | 42.10% | 0.29 | 1.45E-06 |
| BMP2K   | IR-M $\phi$ | 37.50% | 23.10% | 0.27 | 1.46E-06 |
| LAIR1   | IR-M $\phi$ | 34.80% | 20.40% | 0.26 | 1.58E-06 |
| VAMP3   | IR-M $\phi$ | 47.40% | 34.80% | 0.32 | 1.65E-06 |
| TRMT1   | IR-M $\phi$ | 37.90% | 23.70% | 0.28 | 1.84E-06 |
| TRAPPC1 | IR-M $\phi$ | 47.50% | 35.10% | 0.29 | 1.92E-06 |
| ATP5C1  | IR-M $\phi$ | 63.30% | 53.90% | 0.26 | 1.98E-06 |
| RAB31   | IR-M $\phi$ | 67.60% | 58.50% | 0.26 | 2.35E-06 |
| CD302   | IR-M $\phi$ | 45.70% | 32.40% | 0.32 | 2.39E-06 |
| GNB2    | IR-M $\phi$ | 58.70% | 47.40% | 0.26 | 2.39E-06 |
| TREM2   | IR-M $\phi$ | 37.40% | 22.80% | 0.31 | 2.89E-06 |
| KANK2   | IR-M $\phi$ | 25.60% | 13.00% | 0.26 | 3.12E-06 |
| CMTM3   | IR-M $\phi$ | 37.50% | 24.90% | 0.34 | 3.17E-06 |
| CITED2  | IR-M $\phi$ | 41.80% | 27.60% | 0.36 | 4.23E-06 |
| DPYSL2  | IR-M $\phi$ | 65.00% | 56.10% | 0.28 | 4.29E-06 |
| SNHG12  | IR-M $\phi$ | 41.80% | 27.90% | 0.34 | 4.73E-06 |
| ZYX     | IR-M $\phi$ | 46.30% | 32.40% | 0.26 | 5.40E-06 |
| WDR83OS | IR-M $\phi$ | 65.00% | 57.40% | 0.27 | 5.78E-06 |
| RFC1    | IR-M $\phi$ | 26.70% | 14.30% | 0.28 | 6.96E-06 |
| LSM3    | IR-M $\phi$ | 52.30% | 39.50% | 0.26 | 8.06E-06 |
| NBEAL1  | IR-M $\phi$ | 73.30% | 70.50% | 0.27 | 9.09E-06 |
| CHURC1  | IR-M $\phi$ | 44.10% | 31.20% | 0.28 | 1.03E-05 |
| WASF2   | IR-M $\phi$ | 59.60% | 47.50% | 0.27 | 1.05E-05 |
| MGAT4A  | IR-M $\phi$ | 31.40% | 18.10% | 0.26 | 1.06E-05 |
| UACA    | IR-M $\phi$ | 21.70% | 10.50% | 0.29 | 1.08E-05 |
| TKT     | IR-M $\phi$ | 67.10% | 57.40% | 0.26 | 1.09E-05 |
| PRR13   | IR-M $\phi$ | 56.50% | 45.50% | 0.27 | 1.10E-05 |
| DBNL    | IR-M $\phi$ | 42.40% | 29.20% | 0.26 | 1.16E-05 |
| CRTAP   | IR-M $\phi$ | 52.80% | 40.50% | 0.27 | 1.28E-05 |
| CHMP3   | IR-M $\phi$ | 47.90% | 35.50% | 0.28 | 1.34E-05 |
| BCAP31  | IR-M $\phi$ | 56.70% | 46.10% | 0.28 | 1.56E-05 |
| GLUD1   | IR-M $\phi$ | 53.70% | 42.60% | 0.29 | 1.90E-05 |
| NDUFA12 | IR-M $\phi$ | 57.40% | 46.60% | 0.27 | 2.09E-05 |
| EPS15   | IR-M $\phi$ | 30.90% | 17.90% | 0.25 | 2.10E-05 |
| VPS29   | IR-M $\phi$ | 63.30% | 56.40% | 0.27 | 2.14E-05 |
| EVI5    | IR-M $\phi$ | 35.50% | 21.90% | 0.26 | 2.28E-05 |

|          |             |        |        |      |          |
|----------|-------------|--------|--------|------|----------|
| HNRNPUL1 | IR-M $\phi$ | 46.90% | 35.40% | 0.30 | 2.38E-05 |
| AKR1A1   | IR-M $\phi$ | 58.40% | 48.10% | 0.27 | 2.88E-05 |
| SMIM4    | IR-M $\phi$ | 44.30% | 31.70% | 0.25 | 3.84E-05 |
| CLTC     | IR-M $\phi$ | 50.40% | 37.70% | 0.26 | 4.55E-05 |
| NUB1     | IR-M $\phi$ | 23.80% | 12.40% | 0.25 | 4.61E-05 |
| SCAMP2   | IR-M $\phi$ | 40.60% | 28.00% | 0.27 | 5.00E-05 |
| CBX3     | IR-M $\phi$ | 54.80% | 43.00% | 0.25 | 5.27E-05 |
| WLS      | IR-M $\phi$ | 28.20% | 16.10% | 0.28 | 5.30E-05 |
| CAPNS1   | IR-M $\phi$ | 51.30% | 40.30% | 0.27 | 1.03E-04 |
| KIAA1598 | IR-M $\phi$ | 38.90% | 26.20% | 0.26 | 1.05E-04 |
| EMC10    | IR-M $\phi$ | 43.60% | 31.70% | 0.25 | 1.09E-04 |
| PTTG1IP  | IR-M $\phi$ | 53.30% | 43.20% | 0.28 | 1.10E-04 |
| MTIF3    | IR-M $\phi$ | 34.80% | 22.60% | 0.27 | 1.10E-04 |
| SLC20A1  | IR-M $\phi$ | 42.30% | 29.30% | 0.32 | 1.32E-04 |
| TYMP     | IR-M $\phi$ | 54.50% | 43.40% | 0.30 | 1.50E-04 |
| STOM     | IR-M $\phi$ | 44.10% | 31.90% | 0.27 | 1.64E-04 |
| PDIA4    | IR-M $\phi$ | 36.70% | 25.30% | 0.28 | 2.39E-04 |
| NCF2     | IR-M $\phi$ | 45.30% | 33.50% | 0.26 | 2.45E-04 |
| CORO1B   | IR-M $\phi$ | 43.60% | 32.30% | 0.26 | 2.59E-04 |
| ATP5F1   | IR-M $\phi$ | 55.70% | 45.90% | 0.26 | 2.81E-04 |
| KRT10    | IR-M $\phi$ | 40.60% | 28.60% | 0.26 | 3.15E-04 |
| NSA2     | IR-M $\phi$ | 54.80% | 45.40% | 0.27 | 3.64E-04 |
| PPIG     | IR-M $\phi$ | 50.40% | 40.30% | 0.28 | 6.49E-04 |
| CTSA     | IR-M $\phi$ | 49.10% | 38.10% | 0.27 | 7.75E-04 |
| CPM      | IR-M $\phi$ | 50.60% | 38.80% | 0.25 | 8.12E-04 |
| DRAM2    | IR-M $\phi$ | 42.60% | 31.20% | 0.25 | 1.09E-03 |
| GADD45G  | IR-M $\phi$ | 30.70% | 19.00% | 0.29 | 1.19E-03 |
| LARP7    | IR-M $\phi$ | 40.10% | 29.00% | 0.28 | 1.46E-03 |
| SP100    | IR-M $\phi$ | 44.00% | 33.00% | 0.25 | 2.02E-03 |
| C1orf63  | IR-M $\phi$ | 60.80% | 52.30% | 0.28 | 2.43E-03 |
| PRMT2    | IR-M $\phi$ | 47.00% | 37.50% | 0.26 | 9.95E-03 |
| HSPH1    | IR-M $\phi$ | 53.70% | 44.50% | 0.29 | 1.10E-02 |
| TNFRSF1A | IR-M $\phi$ | 45.00% | 35.50% | 0.26 | 1.62E-02 |
| LY96     | IR-M $\phi$ | 56.00% | 50.30% | 0.26 | 3.01E-02 |
| ADIRF    | IR-M $\phi$ | 59.30% | 48.60% | 0.28 | 3.65E-02 |
| PHPT1    | IR-M $\phi$ | 53.30% | 47.10% | 0.25 | 6.54E-02 |
| RN7SL1   | IR-M $\phi$ | 21.70% | 13.70% | 0.41 | 1.10E-01 |
| ALDH2    | IR-M $\phi$ | 63.70% | 58.10% | 0.26 | 1.39E-01 |
| CD36     | IR-M $\phi$ | 25.80% | 18.60% | 0.26 | 1.00E+00 |
| HSPA6    | IR-M $\phi$ | 28.50% | 24.10% | 0.48 | 1.00E+00 |
| CCL3     | I-M $\phi$  | 98.30% | 70.30% | 1.72 | 1.60E-83 |

|               |            |         |        |      |          |
|---------------|------------|---------|--------|------|----------|
| SOD2          | I-M $\phi$ | 99.70%  | 79.70% | 1.23 | 6.49E-83 |
| CCL4          | I-M $\phi$ | 95.70%  | 60.00% | 2.02 | 2.15E-82 |
| IER3          | I-M $\phi$ | 100.00% | 92.20% | 0.87 | 1.70E-78 |
| CXCL1         | I-M $\phi$ | 86.40%  | 42.90% | 1.74 | 4.95E-74 |
| CXCL3         | I-M $\phi$ | 99.40%  | 70.80% | 1.09 | 1.68E-71 |
| CXCL2         | I-M $\phi$ | 99.70%  | 68.30% | 1.07 | 1.16E-69 |
| CCL3L1        | I-M $\phi$ | 71.90%  | 23.70% | 1.49 | 7.44E-69 |
| FNIP2         | I-M $\phi$ | 75.90%  | 34.20% | 0.90 | 1.97E-56 |
| BCL2A1        | I-M $\phi$ | 84.60%  | 36.30% | 0.93 | 1.90E-55 |
| PHLDA1        | I-M $\phi$ | 82.30%  | 40.90% | 0.93 | 1.15E-53 |
| ICAM1         | I-M $\phi$ | 84.30%  | 48.20% | 0.78 | 1.03E-51 |
| IL1B          | I-M $\phi$ | 90.40%  | 52.20% | 0.91 | 1.69E-46 |
| PLAUR         | I-M $\phi$ | 96.50%  | 72.10% | 0.80 | 2.49E-45 |
| NFKB1         | I-M $\phi$ | 80.90%  | 42.90% | 0.72 | 2.91E-45 |
| S100A11       | I-M $\phi$ | 99.70%  | 99.30% | 0.53 | 3.35E-45 |
| TUBA1C        | I-M $\phi$ | 84.10%  | 57.70% | 0.73 | 3.10E-44 |
| THBD          | I-M $\phi$ | 69.60%  | 33.30% | 0.93 | 5.47E-44 |
| TNFAIP3       | I-M $\phi$ | 95.10%  | 63.70% | 0.68 | 2.77E-43 |
| RP11-701P16.5 | I-M $\phi$ | 46.10%  | 12.10% | 1.01 | 3.52E-42 |
| CD44          | I-M $\phi$ | 98.30%  | 90.90% | 0.57 | 3.72E-42 |
| PLEK          | I-M $\phi$ | 90.40%  | 59.50% | 0.70 | 5.24E-42 |
| IL8           | I-M $\phi$ | 99.70%  | 81.60% | 0.62 | 1.44E-40 |
| GLRX          | I-M $\phi$ | 87.00%  | 67.70% | 0.83 | 6.78E-37 |
| CCL2          | I-M $\phi$ | 85.80%  | 58.60% | 1.28 | 7.18E-37 |
| PIM3          | I-M $\phi$ | 67.50%  | 31.30% | 0.59 | 3.42E-36 |
| SPP1          | I-M $\phi$ | 33.00%  | 6.20%  | 2.00 | 7.59E-36 |
| CTSL          | I-M $\phi$ | 86.10%  | 62.30% | 0.78 | 2.19E-35 |
| CFLAR         | I-M $\phi$ | 87.50%  | 59.90% | 0.55 | 2.79E-34 |
| ETS2          | I-M $\phi$ | 83.50%  | 53.20% | 0.58 | 1.60E-32 |
| TNF           | I-M $\phi$ | 79.40%  | 53.80% | 1.16 | 3.23E-32 |
| MMP9          | I-M $\phi$ | 45.20%  | 14.60% | 0.82 | 6.60E-32 |
| PDE4DIP       | I-M $\phi$ | 80.00%  | 52.00% | 0.64 | 2.68E-31 |
| PELI1         | I-M $\phi$ | 69.00%  | 37.80% | 0.67 | 1.69E-30 |
| TXN           | I-M $\phi$ | 98.60%  | 90.40% | 0.59 | 3.13E-30 |
| ABL2          | I-M $\phi$ | 84.30%  | 52.70% | 0.54 | 8.93E-30 |
| MARCKS        | I-M $\phi$ | 72.20%  | 42.50% | 0.67 | 2.87E-29 |
| MIR155HG      | I-M $\phi$ | 58.00%  | 23.00% | 0.61 | 7.73E-29 |
| IL1A          | I-M $\phi$ | 53.60%  | 21.90% | 0.65 | 3.21E-28 |
| CEBPB         | I-M $\phi$ | 81.20%  | 56.10% | 0.69 | 8.99E-28 |
| GPR183        | I-M $\phi$ | 92.80%  | 63.20% | 0.50 | 1.59E-27 |
| CCL20         | I-M $\phi$ | 34.50%  | 9.00%  | 1.21 | 7.20E-27 |

|          |            |         |         |      |          |
|----------|------------|---------|---------|------|----------|
| ATP13A3  | I-M $\phi$ | 60.60%  | 31.10%  | 0.55 | 2.07E-26 |
| FTH1     | I-M $\phi$ | 100.00% | 100.00% | 0.42 | 5.29E-26 |
| TNFAIP2  | I-M $\phi$ | 87.00%  | 65.20%  | 0.58 | 5.39E-26 |
| WTAP     | I-M $\phi$ | 73.30%  | 45.80%  | 0.60 | 5.04E-25 |
| C5AR1    | I-M $\phi$ | 73.60%  | 48.50%  | 0.58 | 7.72E-25 |
| ZC3H12C  | I-M $\phi$ | 34.20%  | 9.90%   | 0.44 | 9.36E-25 |
| IL1RN    | I-M $\phi$ | 49.00%  | 21.20%  | 1.05 | 1.63E-23 |
| RBM47    | I-M $\phi$ | 68.10%  | 43.10%  | 0.55 | 2.63E-23 |
| KANK1    | I-M $\phi$ | 27.50%  | 6.40%   | 0.45 | 6.09E-23 |
| SERTAD2  | I-M $\phi$ | 58.80%  | 32.20%  | 0.54 | 1.38E-22 |
| PLIN2    | I-M $\phi$ | 66.70%  | 41.20%  | 0.75 | 1.80E-22 |
| CCRL2    | I-M $\phi$ | 40.00%  | 14.90%  | 0.53 | 1.88E-22 |
| SDCBP    | I-M $\phi$ | 96.80%  | 87.50%  | 0.34 | 2.09E-22 |
| IL6      | I-M $\phi$ | 44.90%  | 18.80%  | 0.92 | 3.45E-22 |
| EIF4E    | I-M $\phi$ | 85.80%  | 58.70%  | 0.60 | 4.90E-22 |
| DSE      | I-M $\phi$ | 67.20%  | 39.40%  | 0.49 | 7.95E-22 |
| ARID5B   | I-M $\phi$ | 57.40%  | 28.90%  | 0.53 | 8.16E-22 |
| CSTB     | I-M $\phi$ | 94.50%  | 88.70%  | 0.61 | 1.09E-21 |
| ATP6V1F  | I-M $\phi$ | 88.10%  | 73.90%  | 0.42 | 1.32E-21 |
| CYP1B1   | I-M $\phi$ | 73.90%  | 44.90%  | 0.57 | 9.84E-21 |
| F3       | I-M $\phi$ | 28.10%  | 7.50%   | 0.48 | 9.84E-21 |
| PLAU     | I-M $\phi$ | 65.50%  | 40.70%  | 0.67 | 3.00E-20 |
| FTL      | I-M $\phi$ | 100.00% | 100.00% | 0.46 | 5.97E-20 |
| CXCL5    | I-M $\phi$ | 27.80%  | 7.20%   | 0.67 | 6.86E-20 |
| KLF6     | I-M $\phi$ | 98.30%  | 87.70%  | 0.39 | 7.78E-20 |
| OTUD1    | I-M $\phi$ | 47.20%  | 22.10%  | 0.53 | 1.11E-19 |
| ABCA1    | I-M $\phi$ | 52.80%  | 27.80%  | 0.50 | 3.40E-19 |
| BIRC3    | I-M $\phi$ | 68.70%  | 38.80%  | 0.50 | 2.01E-18 |
| PNRC1    | I-M $\phi$ | 90.70%  | 75.10%  | 0.39 | 3.75E-18 |
| MAP2K3   | I-M $\phi$ | 82.90%  | 58.90%  | 0.37 | 6.76E-18 |
| MFSD2A   | I-M $\phi$ | 44.90%  | 20.50%  | 0.40 | 8.53E-18 |
| TNFAIP8  | I-M $\phi$ | 70.10%  | 43.10%  | 0.37 | 2.19E-17 |
| NFE2L2   | I-M $\phi$ | 92.50%  | 70.60%  | 0.40 | 2.78E-17 |
| GPR84    | I-M $\phi$ | 29.60%  | 9.40%   | 0.37 | 3.97E-17 |
| RPS26    | I-M $\phi$ | 89.60%  | 83.70%  | 0.40 | 1.28E-16 |
| SRGN     | I-M $\phi$ | 98.60%  | 91.60%  | 0.31 | 1.51E-16 |
| SLC16A10 | I-M $\phi$ | 40.60%  | 18.40%  | 0.50 | 1.88E-16 |
| INSIG1   | I-M $\phi$ | 87.50%  | 66.00%  | 0.35 | 2.17E-16 |
| PTGER2   | I-M $\phi$ | 42.30%  | 18.60%  | 0.40 | 2.42E-16 |
| KLHL21   | I-M $\phi$ | 44.60%  | 22.20%  | 0.45 | 6.50E-16 |
| CDKN1A   | I-M $\phi$ | 94.20%  | 73.50%  | 0.39 | 9.70E-16 |

|           |            |         |        |      |          |
|-----------|------------|---------|--------|------|----------|
| ACSL1     | I-M $\phi$ | 41.70%  | 19.30% | 0.40 | 1.11E-15 |
| CCL4L2    | I-M $\phi$ | 27.00%  | 8.40%  | 0.44 | 1.68E-15 |
| NINJ1     | I-M $\phi$ | 78.30%  | 58.40% | 0.44 | 6.08E-15 |
| DOT1L     | I-M $\phi$ | 30.10%  | 11.10% | 0.32 | 2.69E-14 |
| MMP19     | I-M $\phi$ | 37.40%  | 16.20% | 0.44 | 5.18E-14 |
| NRP2      | I-M $\phi$ | 65.50%  | 42.10% | 0.40 | 5.31E-14 |
| EHD1      | I-M $\phi$ | 63.20%  | 40.10% | 0.42 | 8.05E-14 |
| TNFAIP6   | I-M $\phi$ | 47.20%  | 22.70% | 0.28 | 9.95E-14 |
| HIF1A     | I-M $\phi$ | 60.00%  | 37.10% | 0.40 | 1.01E-13 |
| RASGRP3   | I-M $\phi$ | 40.00%  | 19.30% | 0.44 | 1.13E-13 |
| ARL8B     | I-M $\phi$ | 58.60%  | 36.60% | 0.39 | 1.66E-13 |
| KMO       | I-M $\phi$ | 25.50%  | 8.30%  | 0.36 | 2.38E-13 |
| KYNU      | I-M $\phi$ | 66.40%  | 42.90% | 0.35 | 3.15E-13 |
| LCP2      | I-M $\phi$ | 53.90%  | 31.90% | 0.39 | 3.44E-13 |
| MT-ATP6   | I-M $\phi$ | 100.00% | 99.70% | 0.26 | 4.29E-13 |
| FAM107B   | I-M $\phi$ | 50.70%  | 28.10% | 0.35 | 5.47E-13 |
| HIVEP2    | I-M $\phi$ | 36.20%  | 16.50% | 0.37 | 6.38E-13 |
| MAFF      | I-M $\phi$ | 53.00%  | 30.50% | 0.33 | 1.72E-12 |
| PRDX1     | I-M $\phi$ | 94.80%  | 87.30% | 0.31 | 3.23E-12 |
| FNDC3B    | I-M $\phi$ | 46.10%  | 25.60% | 0.36 | 3.75E-12 |
| SDC4      | I-M $\phi$ | 32.20%  | 13.40% | 0.29 | 6.51E-12 |
| MESDC1    | I-M $\phi$ | 27.00%  | 10.30% | 0.32 | 1.02E-11 |
| CD109     | I-M $\phi$ | 34.20%  | 15.50% | 0.35 | 1.11E-11 |
| RASGEF1B  | I-M $\phi$ | 71.30%  | 48.60% | 0.32 | 1.19E-11 |
| NAMPT     | I-M $\phi$ | 73.90%  | 54.90% | 0.36 | 1.20E-11 |
| KIF1B     | I-M $\phi$ | 52.50%  | 31.80% | 0.38 | 1.26E-11 |
| CPEB4     | I-M $\phi$ | 63.20%  | 45.20% | 0.45 | 1.26E-11 |
| FABP5     | I-M $\phi$ | 74.20%  | 53.50% | 0.39 | 1.65E-11 |
| AQP9      | I-M $\phi$ | 13.60%  | 2.60%  | 0.32 | 1.82E-11 |
| SLC16A6   | I-M $\phi$ | 17.40%  | 4.40%  | 0.26 | 2.32E-11 |
| SAT1      | I-M $\phi$ | 99.40%  | 98.00% | 0.35 | 2.40E-11 |
| TPRA1     | I-M $\phi$ | 40.30%  | 21.00% | 0.34 | 2.50E-11 |
| ATP6V1B2  | I-M $\phi$ | 59.40%  | 40.30% | 0.36 | 2.93E-11 |
| LINC00152 | I-M $\phi$ | 52.80%  | 32.20% | 0.58 | 3.31E-11 |
| TANK      | I-M $\phi$ | 61.20%  | 40.30% | 0.32 | 3.42E-11 |
| POMP      | I-M $\phi$ | 84.90%  | 71.90% | 0.32 | 5.87E-11 |
| MAPK6     | I-M $\phi$ | 51.30%  | 32.70% | 0.37 | 1.44E-10 |
| FEM1B     | I-M $\phi$ | 28.70%  | 12.40% | 0.40 | 1.68E-10 |
| TLR2      | I-M $\phi$ | 39.70%  | 20.80% | 0.34 | 5.37E-10 |
| MFHAS1    | I-M $\phi$ | 30.40%  | 13.20% | 0.28 | 5.48E-10 |
| NUMB      | I-M $\phi$ | 48.70%  | 30.40% | 0.39 | 5.78E-10 |



|            |            |        |        |      |          |
|------------|------------|--------|--------|------|----------|
| OLR1       | I-M $\phi$ | 47.20% | 24.30% | 0.29 | 6.68E-10 |
| SMS        | I-M $\phi$ | 57.70% | 41.20% | 0.43 | 9.13E-10 |
| ZC3H12A    | I-M $\phi$ | 61.70% | 40.10% | 0.26 | 1.03E-09 |
| METRNL     | I-M $\phi$ | 48.70% | 29.00% | 0.33 | 1.26E-09 |
| USP12      | I-M $\phi$ | 35.40% | 17.30% | 0.31 | 2.21E-09 |
| MAP3K8     | I-M $\phi$ | 72.80% | 54.80% | 0.32 | 2.88E-09 |
| SLC11A2    | I-M $\phi$ | 30.40% | 13.70% | 0.28 | 3.72E-09 |
| DENND5A    | I-M $\phi$ | 43.50% | 25.20% | 0.33 | 3.91E-09 |
| ELL2       | I-M $\phi$ | 46.10% | 28.50% | 0.38 | 3.93E-09 |
| ATP6V1H    | I-M $\phi$ | 44.60% | 25.90% | 0.29 | 4.61E-09 |
| B4GALT5    | I-M $\phi$ | 30.40% | 14.10% | 0.30 | 4.63E-09 |
| SLC43A3    | I-M $\phi$ | 48.40% | 30.80% | 0.37 | 6.98E-09 |
| TXNRD1     | I-M $\phi$ | 56.50% | 34.90% | 0.29 | 7.72E-09 |
| PTPN1      | I-M $\phi$ | 51.00% | 32.10% | 0.39 | 8.45E-09 |
| LUCAT1     | I-M $\phi$ | 53.00% | 33.40% | 0.39 | 1.08E-08 |
| ZNF267     | I-M $\phi$ | 58.60% | 38.00% | 0.29 | 1.33E-08 |
| RALGDS     | I-M $\phi$ | 47.80% | 28.90% | 0.30 | 1.54E-08 |
| LIMS1      | I-M $\phi$ | 63.20% | 49.20% | 0.37 | 2.12E-08 |
| CSGALNACT2 | I-M $\phi$ | 44.90% | 27.50% | 0.33 | 2.32E-08 |
| LITAF      | I-M $\phi$ | 73.00% | 60.90% | 0.37 | 2.84E-08 |
| TRAF1      | I-M $\phi$ | 43.20% | 23.50% | 0.41 | 3.34E-08 |
| PTGS2      | I-M $\phi$ | 53.60% | 35.70% | 0.56 | 3.60E-08 |
| TSC22D1    | I-M $\phi$ | 42.00% | 23.90% | 0.52 | 4.55E-08 |
| MAPKAPK2   | I-M $\phi$ | 43.20% | 26.70% | 0.34 | 5.28E-08 |
| DRAM1      | I-M $\phi$ | 30.10% | 14.70% | 0.29 | 5.71E-08 |
| CLIC4      | I-M $\phi$ | 47.00% | 31.40% | 0.33 | 5.86E-08 |
| KDM6B      | I-M $\phi$ | 81.20% | 62.50% | 0.27 | 5.88E-08 |
| LPXN       | I-M $\phi$ | 53.00% | 34.70% | 0.29 | 8.60E-08 |
| DUSP5      | I-M $\phi$ | 34.50% | 18.10% | 0.36 | 9.41E-08 |
| MAFK       | I-M $\phi$ | 25.80% | 11.50% | 0.28 | 1.18E-07 |
| ZBTB43     | I-M $\phi$ | 41.70% | 24.20% | 0.33 | 1.19E-07 |
| STK40      | I-M $\phi$ | 32.50% | 16.50% | 0.28 | 1.23E-07 |
| PRDM1      | I-M $\phi$ | 40.60% | 23.20% | 0.31 | 3.11E-07 |
| IL10       | I-M $\phi$ | 44.60% | 27.10% | 0.59 | 3.60E-07 |
| ABI1       | I-M $\phi$ | 49.60% | 34.10% | 0.29 | 5.38E-07 |
| CDC42EP3   | I-M $\phi$ | 51.60% | 33.80% | 0.29 | 5.82E-07 |
| ZBTB38     | I-M $\phi$ | 47.20% | 30.80% | 0.32 | 6.39E-07 |
| BTG1       | I-M $\phi$ | 84.30% | 72.10% | 0.30 | 1.35E-06 |
| TNIP3      | I-M $\phi$ | 17.40% | 6.20%  | 0.55 | 1.47E-06 |
| PIK3R5     | I-M $\phi$ | 37.70% | 22.00% | 0.27 | 1.85E-06 |
| EPB41L3    | I-M $\phi$ | 47.80% | 32.30% | 0.28 | 1.91E-06 |

|         |            |        |        |      |           |
|---------|------------|--------|--------|------|-----------|
| SNX10   | I-M $\phi$ | 48.70% | 34.00% | 0.41 | 2.41E-06  |
| CLN8    | I-M $\phi$ | 46.10% | 29.60% | 0.27 | 2.48E-06  |
| FOXO3   | I-M $\phi$ | 47.80% | 31.30% | 0.29 | 3.37E-06  |
| SAV1    | I-M $\phi$ | 34.50% | 19.70% | 0.28 | 5.48E-06  |
| BIRC2   | I-M $\phi$ | 47.80% | 31.60% | 0.25 | 5.63E-06  |
| FOSL2   | I-M $\phi$ | 42.60% | 26.20% | 0.26 | 6.26E-06  |
| LHFPL2  | I-M $\phi$ | 51.00% | 35.00% | 0.30 | 7.17E-06  |
| PDGFB   | I-M $\phi$ | 39.10% | 23.30% | 0.28 | 8.74E-06  |
| PDE4B   | I-M $\phi$ | 49.30% | 31.30% | 0.26 | 9.03E-06  |
| CD93    | I-M $\phi$ | 21.40% | 9.20%  | 0.27 | 1.05E-05  |
| NOTCH2  | I-M $\phi$ | 41.40% | 25.00% | 0.25 | 1.31E-05  |
| EREG    | I-M $\phi$ | 31.00% | 16.00% | 0.70 | 1.33E-05  |
| TIPARP  | I-M $\phi$ | 62.00% | 44.30% | 0.26 | 1.78E-05  |
| NSMAF   | I-M $\phi$ | 38.60% | 23.20% | 0.33 | 1.78E-05  |
| MIR22HG | I-M $\phi$ | 69.60% | 52.30% | 0.27 | 2.24E-05  |
| GCLM    | I-M $\phi$ | 31.60% | 17.50% | 0.26 | 2.52E-05  |
| SPHK1   | I-M $\phi$ | 30.70% | 17.20% | 0.26 | 1.01E-04  |
| B3GNT5  | I-M $\phi$ | 41.40% | 26.90% | 0.27 | 1.27E-04  |
| MMP14   | I-M $\phi$ | 47.00% | 31.40% | 0.26 | 1.51E-04  |
| ICAM4   | I-M $\phi$ | 23.50% | 11.80% | 0.29 | 1.92E-04  |
| SLC7A5  | I-M $\phi$ | 28.10% | 15.20% | 0.26 | 2.27E-04  |
| RYBP    | I-M $\phi$ | 47.20% | 32.60% | 0.25 | 4.48E-04  |
| TNIP1   | I-M $\phi$ | 44.90% | 30.10% | 0.26 | 1.19E-03  |
| DNTTIP2 | I-M $\phi$ | 57.10% | 42.90% | 0.27 | 1.67E-03  |
| BACH1   | I-M $\phi$ | 42.00% | 29.10% | 0.26 | 2.15E-03  |
| SNAPC1  | I-M $\phi$ | 32.20% | 20.50% | 0.52 | 3.71E-03  |
| NRIP1   | I-M $\phi$ | 33.90% | 22.40% | 0.28 | 4.43E-03  |
| ANPEP   | I-M $\phi$ | 40.60% | 29.00% | 0.31 | 5.23E-03  |
| BTG3    | I-M $\phi$ | 46.70% | 35.40% | 0.28 | 5.71E-03  |
| QKI     | I-M $\phi$ | 59.70% | 48.10% | 0.27 | 6.74E-03  |
| GNA13   | I-M $\phi$ | 38.60% | 27.30% | 0.25 | 2.06E-02  |
| MIR29A  | I-M $\phi$ | 33.60% | 22.70% | 0.26 | 1.26E-01  |
| THAP2   | I-M $\phi$ | 30.40% | 21.00% | 0.26 | 7.52E-01  |
| CCL3L3  | I-M $\phi$ | 28.10% | 19.80% | 0.46 | 1.00E+00  |
| CCL8    | I-M $\phi$ | 13.30% | 7.00%  | 0.25 | 1.00E+00  |
| CCL18   | I-M $\phi$ | 21.20% | 13.70% | 0.35 | 1.00E+00  |
| RND3    | I-M $\phi$ | 31.00% | 24.20% | 0.30 | 1.00E+00  |
| PFKFB3  | I-M $\phi$ | 38.60% | 32.00% | 0.26 | 1.00E+00  |
| FCER1A  | DC         | 86.90% | 9.50%  | 2.45 | 6.79E-174 |
| IL1R2   | DC         | 74.10% | 6.90%  | 1.72 | 2.13E-143 |
| CD1C    | DC         | 53.10% | 1.50%  | 1.41 | 1.38E-119 |

|            |    |         |         |      |           |
|------------|----|---------|---------|------|-----------|
| CLEC10A    | DC | 80.30%  | 16.90%  | 1.36 | 1.52E-114 |
| LGALS2     | DC | 60.60%  | 5.30%   | 1.07 | 6.43E-109 |
| HLA-DPB1   | DC | 100.00% | 90.50%  | 1.14 | 2.23E-97  |
| AMICA1     | DC | 58.10%  | 6.20%   | 0.83 | 3.07E-96  |
| HLA-DQA1   | DC | 96.60%  | 61.50%  | 1.43 | 1.73E-93  |
| HLA-DQB1   | DC | 98.40%  | 75.40%  | 1.34 | 4.22E-93  |
| HLA-DRA    | DC | 100.00% | 96.80%  | 1.07 | 3.34E-91  |
| HLA-DPA1   | DC | 100.00% | 92.70%  | 1.09 | 2.77E-90  |
| AGPAT9     | DC | 51.90%  | 5.00%   | 0.90 | 7.63E-87  |
| CCR7       | DC | 47.80%  | 4.40%   | 1.60 | 5.75E-82  |
| RHOF       | DC | 55.30%  | 8.40%   | 0.94 | 1.28E-77  |
| CD48       | DC | 51.20%  | 7.20%   | 0.73 | 8.02E-74  |
| GOS2       | DC | 65.60%  | 16.90%  | 2.13 | 1.49E-72  |
| EIF1       | DC | 100.00% | 99.40%  | 0.58 | 1.76E-69  |
| SRGN       | DC | 98.80%  | 91.70%  | 1.04 | 2.56E-69  |
| HLA-DRB5   | DC | 99.70%  | 91.00%  | 0.99 | 7.90E-69  |
| REL        | DC | 93.80%  | 66.00%  | 1.07 | 7.66E-68  |
| CFP        | DC | 55.60%  | 10.60%  | 0.70 | 6.00E-64  |
| C15orf48   | DC | 67.50%  | 21.80%  | 1.51 | 3.49E-62  |
| CCL22      | DC | 32.20%  | 1.40%   | 1.21 | 8.60E-62  |
| RILPL2     | DC | 70.60%  | 24.70%  | 0.87 | 7.66E-61  |
| RPL3       | DC | 100.00% | 99.60%  | 0.50 | 6.00E-60  |
| CYTIP      | DC | 73.80%  | 29.30%  | 0.97 | 7.67E-59  |
| RPS2       | DC | 100.00% | 99.70%  | 0.51 | 5.03E-56  |
| CD1E       | DC | 25.90%  | 0.40%   | 0.49 | 5.78E-56  |
| GPR183     | DC | 92.80%  | 63.90%  | 1.00 | 2.41E-55  |
| STX11      | DC | 74.10%  | 34.90%  | 0.90 | 1.66E-53  |
| RPL18A     | DC | 100.00% | 99.60%  | 0.44 | 4.96E-53  |
| CST7       | DC | 26.60%  | 0.90%   | 0.60 | 1.84E-52  |
| HLA-DRB1   | DC | 100.00% | 94.40%  | 0.69 | 5.05E-52  |
| SERPINB9   | DC | 74.40%  | 34.00%  | 1.01 | 1.09E-51  |
| LSP1       | DC | 78.10%  | 33.70%  | 0.81 | 4.87E-51  |
| RPS27      | DC | 100.00% | 100.00% | 0.40 | 7.13E-51  |
| RPL10      | DC | 100.00% | 100.00% | 0.37 | 3.09E-50  |
| TRAF1      | DC | 60.90%  | 18.50%  | 0.81 | 1.59E-49  |
| EEF1A1     | DC | 100.00% | 100.00% | 0.35 | 7.91E-49  |
| RP6-91H8.3 | DC | 28.80%  | 1.90%   | 0.48 | 4.39E-48  |
| PHACTR1    | DC | 63.10%  | 20.90%  | 0.80 | 5.06E-48  |
| HLA-DQA2   | DC | 77.20%  | 38.00%  | 1.25 | 5.65E-48  |
| PTGIR      | DC | 40.90%  | 6.90%   | 0.64 | 6.08E-48  |
| RPS9       | DC | 100.00% | 99.90%  | 0.37 | 6.22E-48  |

|          |    |         |         |      |          |
|----------|----|---------|---------|------|----------|
| RPS19    | DC | 99.70%  | 99.70%  | 0.45 | 1.32E-47 |
| PABPC1   | DC | 99.10%  | 96.50%  | 0.52 | 3.48E-47 |
| IL8      | DC | 94.10%  | 83.80%  | 1.06 | 2.41E-46 |
| LIMD2    | DC | 29.10%  | 2.40%   | 0.40 | 3.76E-46 |
| RPL11    | DC | 100.00% | 99.80%  | 0.39 | 8.66E-46 |
| STK4     | DC | 67.80%  | 29.00%  | 0.79 | 2.48E-45 |
| PLAUR    | DC | 94.70%  | 73.30%  | 0.77 | 1.45E-44 |
| RPS3     | DC | 100.00% | 99.40%  | 0.41 | 5.06E-44 |
| RPS18    | DC | 100.00% | 99.90%  | 0.46 | 6.45E-44 |
| PDE4B    | DC | 67.50%  | 26.10%  | 0.66 | 1.23E-43 |
| MARCKSL1 | DC | 46.90%  | 10.90%  | 0.61 | 2.79E-43 |
| TNFAIP8  | DC | 77.50%  | 41.50%  | 0.95 | 1.05E-42 |
| INSIG1   | DC | 88.10%  | 66.40%  | 0.96 | 1.10E-42 |
| RPL28    | DC | 100.00% | 99.70%  | 0.39 | 4.11E-42 |
| DUSP4    | DC | 49.70%  | 14.90%  | 1.01 | 5.61E-41 |
| CXCR4    | DC | 78.10%  | 42.00%  | 1.00 | 7.02E-41 |
| RPS7     | DC | 99.70%  | 98.80%  | 0.44 | 4.94E-40 |
| CD52     | DC | 36.90%  | 6.70%   | 0.66 | 8.28E-40 |
| PLD4     | DC | 23.80%  | 1.50%   | 0.37 | 1.76E-39 |
| BIRC3    | DC | 75.00%  | 37.50%  | 0.84 | 2.28E-39 |
| CD74     | DC | 100.00% | 99.20%  | 0.50 | 4.03E-39 |
| RPL6     | DC | 100.00% | 99.10%  | 0.40 | 4.04E-39 |
| RPS3A    | DC | 99.70%  | 99.90%  | 0.38 | 2.77E-38 |
| ETV3     | DC | 54.10%  | 18.30%  | 0.57 | 6.96E-38 |
| RPL4     | DC | 99.40%  | 93.70%  | 0.49 | 2.51E-37 |
| RPS16    | DC | 99.70%  | 99.70%  | 0.36 | 1.58E-36 |
| RPL41    | DC | 100.00% | 100.00% | 0.30 | 1.63E-36 |
| TMEM120B | DC | 29.10%  | 4.00%   | 0.46 | 4.89E-36 |
| RPL13A   | DC | 100.00% | 100.00% | 0.31 | 1.30E-35 |
| RPLP0    | DC | 99.40%  | 96.00%  | 0.42 | 1.32E-35 |
| CSF2RA   | DC | 65.90%  | 30.90%  | 0.68 | 1.38E-35 |
| RPS6     | DC | 100.00% | 100.00% | 0.36 | 1.93E-35 |
| CD55     | DC | 92.20%  | 75.30%  | 0.62 | 2.85E-35 |
| PKIB     | DC | 33.40%  | 6.30%   | 0.50 | 7.84E-35 |
| H3F3A    | DC | 99.10%  | 97.10%  | 0.45 | 1.18E-34 |
| RPL34    | DC | 99.70%  | 100.00% | 0.37 | 2.47E-34 |
| IL411    | DC | 28.40%  | 4.10%   | 0.56 | 2.49E-34 |
| SLC7A11  | DC | 32.20%  | 5.70%   | 0.71 | 4.18E-34 |
| IL1B     | DC | 85.00%  | 54.80%  | 1.09 | 4.54E-34 |
| RPL26    | DC | 99.70%  | 99.80%  | 0.33 | 5.73E-34 |
| DDX5     | DC | 99.10%  | 96.00%  | 0.52 | 2.23E-33 |

|              |    |         |         |      |          |
|--------------|----|---------|---------|------|----------|
| RPL37        | DC | 100.00% | 99.70%  | 0.34 | 2.39E-33 |
| SRSF2        | DC | 89.40%  | 68.00%  | 0.57 | 3.52E-33 |
| RGS1         | DC | 91.90%  | 70.00%  | 0.77 | 3.89E-33 |
| HLA-A        | DC | 99.10%  | 94.50%  | 0.47 | 6.68E-33 |
| RPS13        | DC | 99.70%  | 99.80%  | 0.33 | 1.53E-31 |
| H3F3B        | DC | 100.00% | 98.80%  | 0.47 | 2.06E-31 |
| CREM         | DC | 65.00%  | 36.50%  | 0.94 | 1.58E-30 |
| EZR          | DC | 85.90%  | 62.60%  | 0.66 | 1.65E-30 |
| ADAM8        | DC | 35.30%  | 8.20%   | 0.45 | 5.06E-30 |
| RPL13        | DC | 100.00% | 100.00% | 0.29 | 8.47E-30 |
| MIR29A       | DC | 50.00%  | 17.90%  | 0.51 | 1.63E-29 |
| ADAM19       | DC | 22.80%  | 2.70%   | 0.43 | 2.44E-29 |
| RPS8         | DC | 99.40%  | 99.80%  | 0.36 | 2.59E-29 |
| MIR181A1HG   | DC | 25.60%  | 3.70%   | 0.36 | 3.00E-29 |
| CCND2        | DC | 37.20%  | 9.90%   | 0.46 | 3.78E-29 |
| RPS5         | DC | 99.40%  | 98.10%  | 0.34 | 4.80E-29 |
| CYCS         | DC | 88.40%  | 65.00%  | 0.58 | 7.87E-29 |
| RPL18        | DC | 99.70%  | 99.00%  | 0.33 | 9.87E-29 |
| RPL39        | DC | 99.70%  | 99.70%  | 0.30 | 1.46E-28 |
| RALA         | DC | 55.00%  | 23.40%  | 0.65 | 2.05E-28 |
| ANKRD28      | DC | 73.40%  | 45.10%  | 0.74 | 2.31E-28 |
| RP11-138A9.2 | DC | 32.50%  | 7.20%   | 0.44 | 3.07E-28 |
| NFKBID       | DC | 66.90%  | 32.90%  | 0.53 | 5.10E-28 |
| RPL10A       | DC | 99.70%  | 98.90%  | 0.35 | 6.61E-28 |
| AREG         | DC | 22.80%  | 2.90%   | 0.36 | 7.94E-28 |
| CXCR3        | DC | 18.10%  | 1.30%   | 0.39 | 8.46E-28 |
| SAT1         | DC | 98.80%  | 98.30%  | 0.61 | 1.22E-27 |
| RPS24        | DC | 100.00% | 99.90%  | 0.30 | 1.38E-27 |
| ICAM3        | DC | 24.40%  | 3.70%   | 0.37 | 4.61E-27 |
| CD69         | DC | 26.60%  | 4.60%   | 0.42 | 5.09E-27 |
| IL7R         | DC | 29.10%  | 5.90%   | 0.61 | 7.23E-27 |
| BCL2A1       | DC | 72.50%  | 41.20%  | 0.84 | 7.36E-27 |
| ISG20        | DC | 45.30%  | 16.10%  | 0.59 | 1.31E-26 |
| NLRP3        | DC | 57.50%  | 25.50%  | 0.64 | 2.47E-26 |
| AKAP13       | DC | 85.30%  | 64.90%  | 0.54 | 3.31E-26 |
| HLA-DQB2     | DC | 20.00%  | 2.20%   | 0.29 | 3.85E-26 |
| RPS23        | DC | 99.40%  | 100.00% | 0.31 | 3.88E-26 |
| DAPP1        | DC | 31.20%  | 7.30%   | 0.46 | 6.55E-26 |
| GPBP1        | DC | 76.20%  | 50.30%  | 0.53 | 7.65E-26 |
| PMAIP1       | DC | 73.40%  | 42.40%  | 0.60 | 1.30E-25 |
| BAZ1A        | DC | 82.80%  | 57.90%  | 0.56 | 1.37E-25 |

|           |    |         |         |      |          |
|-----------|----|---------|---------|------|----------|
| EREG      | DC | 41.20%  | 13.20%  | 0.82 | 1.74E-25 |
| PTPRE     | DC | 70.30%  | 39.10%  | 0.60 | 2.20E-25 |
| RGS2      | DC | 75.60%  | 50.10%  | 1.04 | 2.26E-25 |
| CPVL      | DC | 86.20%  | 64.40%  | 0.65 | 6.06E-25 |
| CD86      | DC | 64.40%  | 33.50%  | 0.55 | 6.53E-25 |
| TXNRD1    | DC | 61.90%  | 33.80%  | 0.71 | 6.59E-25 |
| SLC38A1   | DC | 19.10%  | 2.10%   | 0.26 | 7.16E-25 |
| PPIF      | DC | 55.90%  | 25.20%  | 0.62 | 7.85E-25 |
| RPL30     | DC | 99.70%  | 99.50%  | 0.29 | 1.15E-24 |
| RPS15A    | DC | 100.00% | 99.90%  | 0.28 | 1.34E-24 |
| OLR1      | DC | 51.90%  | 23.50%  | 0.77 | 3.07E-24 |
| RPL5      | DC | 99.40%  | 98.60%  | 0.30 | 3.22E-24 |
| RPL7      | DC | 99.70%  | 99.50%  | 0.29 | 4.62E-24 |
| RPL21     | DC | 100.00% | 100.00% | 0.26 | 7.14E-24 |
| MAP3K8    | DC | 77.50%  | 53.70%  | 0.53 | 7.81E-24 |
| CDKN1A    | DC | 93.80%  | 74.10%  | 0.46 | 2.37E-23 |
| MCOLN2    | DC | 29.70%  | 7.10%   | 0.36 | 4.05E-23 |
| PRMT10    | DC | 26.20%  | 5.50%   | 0.50 | 4.15E-23 |
| TES       | DC | 53.10%  | 24.80%  | 0.54 | 5.09E-23 |
| HLA-DMA   | DC | 96.60%  | 86.10%  | 0.40 | 5.77E-23 |
| SNHG15    | DC | 47.80%  | 19.80%  | 0.52 | 1.03E-22 |
| IL2RG     | DC | 22.80%  | 3.90%   | 0.28 | 2.41E-22 |
| BTG1      | DC | 86.20%  | 71.80%  | 0.73 | 9.63E-22 |
| RPS4X     | DC | 99.70%  | 99.60%  | 0.28 | 1.18E-21 |
| RPL9      | DC | 99.70%  | 99.70%  | 0.27 | 1.80E-21 |
| PPP1R15A  | DC | 98.40%  | 88.60%  | 0.65 | 2.02E-21 |
| KYNU      | DC | 68.10%  | 42.90%  | 0.63 | 2.84E-21 |
| HMGA1     | DC | 59.70%  | 31.10%  | 0.46 | 2.91E-21 |
| FAU       | DC | 100.00% | 99.80%  | 0.25 | 3.04E-21 |
| BID       | DC | 64.10%  | 36.40%  | 0.54 | 3.47E-21 |
| LUCAT1    | DC | 60.90%  | 31.40%  | 0.52 | 3.80E-21 |
| RPL32     | DC | 99.70%  | 99.90%  | 0.26 | 4.74E-21 |
| MIR142    | DC | 36.20%  | 11.90%  | 0.42 | 7.56E-21 |
| LINC00936 | DC | 56.60%  | 30.00%  | 0.68 | 8.01E-21 |
| SAMSN1    | DC | 42.50%  | 17.50%  | 0.74 | 1.36E-20 |
| RPL23A    | DC | 99.70%  | 99.40%  | 0.29 | 2.16E-20 |
| RPSA      | DC | 98.40%  | 94.90%  | 0.33 | 3.49E-20 |
| GNB2L1    | DC | 98.80%  | 97.40%  | 0.30 | 4.09E-20 |
| EEF2      | DC | 95.90%  | 89.10%  | 0.35 | 4.26E-20 |
| NFKB2     | DC | 54.70%  | 26.00%  | 0.42 | 5.23E-20 |
| H2AFZ     | DC | 93.40%  | 85.50%  | 0.56 | 9.16E-20 |

|              |    |         |         |      |          |
|--------------|----|---------|---------|------|----------|
| ADAM28       | DC | 22.20%  | 4.20%   | 0.31 | 1.06E-19 |
| DDIT4        | DC | 70.60%  | 46.90%  | 0.63 | 1.61E-19 |
| SLC25A6      | DC | 95.00%  | 87.80%  | 0.40 | 1.74E-19 |
| RUNX3        | DC | 33.10%  | 10.30%  | 0.38 | 1.89E-19 |
| CD83         | DC | 95.00%  | 80.90%  | 0.59 | 1.99E-19 |
| HLA-B        | DC | 99.70%  | 99.00%  | 0.28 | 2.93E-19 |
| NFAT5        | DC | 57.50%  | 28.30%  | 0.38 | 2.94E-19 |
| C12orf75     | DC | 16.90%  | 2.30%   | 0.28 | 5.45E-19 |
| MIR22HG      | DC | 77.20%  | 50.40%  | 0.46 | 6.10E-19 |
| IL23A        | DC | 21.60%  | 4.20%   | 0.39 | 6.91E-19 |
| FAM49A       | DC | 50.60%  | 24.10%  | 0.45 | 7.01E-19 |
| SIPA1L1      | DC | 46.20%  | 19.70%  | 0.40 | 8.36E-19 |
| CXCL16       | DC | 73.40%  | 48.80%  | 0.52 | 1.07E-18 |
| VEGFA        | DC | 48.40%  | 21.50%  | 0.46 | 1.64E-18 |
| RP11-58E21.3 | DC | 19.40%  | 3.40%   | 0.28 | 2.07E-18 |
| AC016831.7   | DC | 24.70%  | 5.80%   | 0.31 | 2.53E-18 |
| RPL35A       | DC | 99.40%  | 99.80%  | 0.27 | 2.55E-18 |
| RPL15        | DC | 100.00% | 100.00% | 0.25 | 2.71E-18 |
| TMEM123      | DC | 78.80%  | 56.40%  | 0.48 | 3.69E-18 |
| MTHFD2       | DC | 57.50%  | 32.30%  | 0.51 | 5.14E-18 |
| HCST         | DC | 80.00%  | 53.30%  | 0.42 | 6.26E-18 |
| EEF1B2       | DC | 97.20%  | 93.00%  | 0.33 | 8.99E-18 |
| RPL31        | DC | 99.70%  | 99.60%  | 0.26 | 1.51E-17 |
| ID2          | DC | 91.90%  | 82.40%  | 0.56 | 1.97E-17 |
| EIF4A1       | DC | 99.40%  | 95.60%  | 0.34 | 2.02E-17 |
| NAP1L1       | DC | 91.90%  | 76.70%  | 0.45 | 3.13E-17 |
| PTGER4       | DC | 40.90%  | 16.30%  | 0.44 | 3.20E-17 |
| PID1         | DC | 39.70%  | 15.60%  | 0.42 | 4.34E-17 |
| MAP2K3       | DC | 80.60%  | 60.20%  | 0.45 | 6.21E-17 |
| NAMPT        | DC | 75.90%  | 54.70%  | 0.46 | 6.36E-17 |
| LST1         | DC | 89.70%  | 73.20%  | 0.35 | 9.05E-17 |
| LITAF        | DC | 80.00%  | 59.10%  | 0.44 | 1.64E-16 |
| NPM1         | DC | 96.60%  | 89.50%  | 0.40 | 1.76E-16 |
| BASP1        | DC | 41.90%  | 18.10%  | 0.46 | 2.02E-16 |
| TCHH         | DC | 31.20%  | 10.50%  | 0.59 | 2.48E-16 |
| RPL36A       | DC | 98.40%  | 92.50%  | 0.30 | 4.08E-16 |
| TRAF4        | DC | 21.60%  | 4.90%   | 0.27 | 4.40E-16 |
| FNBP1        | DC | 60.90%  | 34.60%  | 0.43 | 6.59E-16 |
| THAP2        | DC | 42.50%  | 17.50%  | 0.38 | 9.03E-16 |
| EHD1         | DC | 64.40%  | 40.30%  | 0.50 | 9.52E-16 |
| ATF4         | DC | 94.10%  | 82.80%  | 0.36 | 9.63E-16 |

|              |    |        |        |      |          |
|--------------|----|--------|--------|------|----------|
| NFKBIA       | DC | 97.80% | 93.10% | 0.48 | 2.85E-15 |
| NFE2L2       | DC | 85.90% | 73.10% | 0.39 | 3.15E-15 |
| LPXN         | DC | 58.10% | 33.60% | 0.41 | 4.64E-15 |
| RASSF5       | DC | 35.00% | 13.60% | 0.35 | 4.95E-15 |
| EIF3L        | DC | 74.10% | 55.20% | 0.40 | 6.33E-15 |
| RPS10        | DC | 97.50% | 96.30% | 0.28 | 6.41E-15 |
| ARL4C        | DC | 48.10% | 23.00% | 0.47 | 9.18E-15 |
| TACSTD2      | DC | 10.90% | 0.90%  | 0.45 | 9.76E-15 |
| NR4A3        | DC | 45.30% | 21.30% | 0.43 | 1.02E-14 |
| TNFRSF1B     | DC | 59.10% | 34.80% | 0.46 | 1.03E-14 |
| TGIF1        | DC | 59.10% | 35.90% | 0.44 | 1.29E-14 |
| ETF1         | DC | 67.20% | 42.00% | 0.38 | 1.69E-14 |
| RP11-138A9.1 | DC | 37.50% | 16.00% | 0.38 | 1.83E-14 |
| CFLAR        | DC | 83.40% | 61.80% | 0.41 | 2.46E-14 |
| SDCBP        | DC | 93.40% | 88.80% | 0.45 | 3.33E-14 |
| HNRNPA0      | DC | 75.90% | 58.20% | 0.40 | 6.28E-14 |
| MIR155HG     | DC | 49.40% | 26.40% | 0.68 | 7.05E-14 |
| MXD1         | DC | 42.50% | 20.60% | 0.56 | 7.23E-14 |
| SKIL         | DC | 68.10% | 46.60% | 0.44 | 9.67E-14 |
| IFRD1        | DC | 65.60% | 41.70% | 0.46 | 1.11E-13 |
| SPAG9        | DC | 70.60% | 50.40% | 0.42 | 1.37E-13 |
| ATP2B1       | DC | 83.40% | 68.30% | 0.43 | 1.37E-13 |
| CHD2         | DC | 56.60% | 34.10% | 0.43 | 2.16E-13 |
| SERPINB1     | DC | 70.30% | 52.20% | 0.68 | 5.03E-13 |
| ATP1B1       | DC | 44.10% | 21.50% | 0.44 | 6.24E-13 |
| BTF3         | DC | 97.20% | 92.60% | 0.26 | 6.64E-13 |
| DNTTIP2      | DC | 63.10% | 41.40% | 0.38 | 9.49E-13 |
| SLC25A5      | DC | 85.00% | 73.20% | 0.36 | 1.02E-12 |
| SYAP1        | DC | 55.00% | 32.60% | 0.41 | 1.92E-12 |
| C10orf128    | DC | 27.80% | 9.70%  | 0.29 | 2.11E-12 |
| TIPARP       | DC | 66.90% | 43.20% | 0.38 | 2.18E-12 |
| SLC2A3       | DC | 43.10% | 20.80% | 0.38 | 2.34E-12 |
| NFKBIZ       | DC | 75.90% | 55.90% | 0.41 | 3.30E-12 |
| HNRNPC       | DC | 91.20% | 79.10% | 0.30 | 3.46E-12 |
| UBE2D3       | DC | 90.30% | 77.60% | 0.32 | 3.76E-12 |
| FCN1         | DC | 16.20% | 3.40%  | 0.35 | 3.89E-12 |
| GK           | DC | 29.70% | 11.20% | 0.31 | 5.18E-12 |
| SQSTM1       | DC | 94.70% | 84.10% | 0.40 | 8.29E-12 |
| ATP1B3       | DC | 77.20% | 62.00% | 0.52 | 9.47E-12 |
| CD58         | DC | 58.40% | 38.20% | 0.37 | 1.15E-11 |
| SLC3A2       | DC | 76.60% | 67.90% | 0.55 | 1.64E-11 |



|           |    |        |        |      |          |
|-----------|----|--------|--------|------|----------|
| REV3L     | DC | 42.80% | 21.60% | 0.39 | 1.76E-11 |
| TNIP1     | DC | 50.60% | 28.70% | 0.40 | 1.81E-11 |
| JARID2    | DC | 35.00% | 15.00% | 0.33 | 2.22E-11 |
| ZNF331    | DC | 36.20% | 16.70% | 0.58 | 2.44E-11 |
| RBM8A     | DC | 83.40% | 66.70% | 0.33 | 2.54E-11 |
| NDRG2     | DC | 29.10% | 10.90% | 0.26 | 3.17E-11 |
| CHMP1B    | DC | 70.30% | 54.00% | 0.53 | 3.25E-11 |
| ZC3H12A   | DC | 61.90% | 40.60% | 0.42 | 5.06E-11 |
| PELO      | DC | 25.00% | 8.70%  | 0.28 | 5.52E-11 |
| CDC42EP3  | DC | 54.40% | 33.30% | 0.44 | 7.94E-11 |
| IL10      | DC | 47.20% | 26.70% | 0.59 | 1.09E-10 |
| ACSL5     | DC | 34.70% | 14.80% | 0.26 | 1.12E-10 |
| SLC1A5    | DC | 40.30% | 20.80% | 0.35 | 1.45E-10 |
| JUNB      | DC | 99.10% | 95.20% | 0.50 | 1.49E-10 |
| PHLDA2    | DC | 67.20% | 51.30% | 0.68 | 1.55E-10 |
| SERPINA1  | DC | 30.30% | 12.00% | 0.26 | 1.81E-10 |
| NEDD9     | DC | 30.30% | 12.50% | 0.30 | 2.16E-10 |
| CASC7     | DC | 31.90% | 13.60% | 0.28 | 2.46E-10 |
| SDPR      | DC | 17.20% | 4.30%  | 0.27 | 2.62E-10 |
| CXCL3     | DC | 87.20% | 75.20% | 0.64 | 2.67E-10 |
| VASP      | DC | 76.20% | 58.10% | 0.35 | 3.27E-10 |
| BZW1      | DC | 73.80% | 53.00% | 0.32 | 3.93E-10 |
| TCOF1     | DC | 35.90% | 17.50% | 0.50 | 5.41E-10 |
| LINC00152 | DC | 54.70% | 32.10% | 0.29 | 6.09E-10 |
| DNAJB6    | DC | 82.80% | 67.40% | 0.40 | 6.43E-10 |
| MAFF      | DC | 52.50% | 31.20% | 0.39 | 7.92E-10 |
| FOSL2     | DC | 46.90% | 25.30% | 0.32 | 1.13E-09 |
| MCL1      | DC | 90.60% | 79.20% | 0.38 | 1.15E-09 |
| IRF7      | DC | 33.80% | 15.60% | 0.36 | 1.39E-09 |
| EIF3F     | DC | 76.90% | 57.00% | 0.31 | 1.44E-09 |
| RAB8B     | DC | 41.60% | 21.00% | 0.29 | 2.01E-09 |
| LYZ       | DC | 96.60% | 90.00% | 0.49 | 2.07E-09 |
| MIR24-2   | DC | 45.30% | 24.00% | 0.34 | 2.17E-09 |
| NFKB1     | DC | 68.10% | 47.70% | 0.39 | 2.34E-09 |
| GLTSCR2   | DC | 86.90% | 72.10% | 0.28 | 2.38E-09 |
| KDM6B     | DC | 83.10% | 62.40% | 0.30 | 2.60E-09 |
| PLEK      | DC | 77.80% | 64.10% | 0.38 | 2.67E-09 |
| GLA       | DC | 52.50% | 32.30% | 0.39 | 2.70E-09 |
| SUB1      | DC | 82.50% | 69.60% | 0.33 | 3.07E-09 |
| RNF24     | DC | 29.10% | 12.60% | 0.34 | 3.73E-09 |
| PVRL2     | DC | 40.30% | 20.70% | 0.29 | 3.85E-09 |

|           |    |        |        |      |          |
|-----------|----|--------|--------|------|----------|
| ZFP36     | DC | 94.10% | 89.20% | 0.58 | 5.24E-09 |
| GNA15     | DC | 52.50% | 32.90% | 0.35 | 5.75E-09 |
| CMTM6     | DC | 74.40% | 57.80% | 0.38 | 7.08E-09 |
| ARL8B     | DC | 58.10% | 37.30% | 0.33 | 1.53E-08 |
| ARL5B     | DC | 36.90% | 19.10% | 0.39 | 1.98E-08 |
| ATP1A1    | DC | 76.90% | 60.80% | 0.34 | 2.20E-08 |
| CA2       | DC | 20.90% | 7.40%  | 0.32 | 2.96E-08 |
| KCNN4     | DC | 34.10% | 16.30% | 0.27 | 3.29E-08 |
| HNRNPA2B1 | DC | 97.80% | 92.00% | 0.29 | 4.01E-08 |
| TUBB4B    | DC | 86.20% | 78.20% | 0.42 | 5.02E-08 |
| CSRNP1    | DC | 63.40% | 42.20% | 0.34 | 5.15E-08 |
| XBP1      | DC | 66.20% | 47.60% | 0.32 | 7.74E-08 |
| SETD5-AS1 | DC | 49.40% | 29.60% | 0.32 | 9.17E-08 |
| PLEKHF2   | DC | 27.20% | 11.80% | 0.27 | 1.05E-07 |
| TARS      | DC | 35.00% | 18.80% | 0.34 | 1.11E-07 |
| SPHK1     | DC | 34.10% | 16.50% | 0.25 | 1.12E-07 |
| EIF4E     | DC | 77.80% | 61.80% | 0.32 | 1.96E-07 |
| TET2      | DC | 41.60% | 21.90% | 0.26 | 2.13E-07 |
| EIF5      | DC | 86.60% | 74.70% | 0.31 | 2.75E-07 |
| IL10RA    | DC | 54.40% | 34.40% | 0.28 | 2.82E-07 |
| RBM23     | DC | 37.80% | 20.00% | 0.25 | 3.10E-07 |
| MBP       | DC | 53.40% | 35.30% | 0.33 | 3.47E-07 |
| LMNA      | DC | 97.50% | 96.90% | 0.34 | 4.53E-07 |
| MAFG      | DC | 49.40% | 30.00% | 0.34 | 4.87E-07 |
| PIM3      | DC | 56.20% | 35.60% | 0.33 | 6.37E-07 |
| AKIRIN2   | DC | 44.40% | 26.90% | 0.34 | 6.66E-07 |
| RHEB      | DC | 72.50% | 57.40% | 0.28 | 1.19E-06 |
| SFR1      | DC | 27.50% | 13.10% | 0.33 | 1.67E-06 |
| PTGS2     | DC | 53.80% | 36.10% | 0.39 | 1.96E-06 |
| RBM39     | DC | 83.10% | 70.40% | 0.28 | 2.10E-06 |
| CLEC5A    | DC | 31.60% | 15.70% | 0.31 | 2.36E-06 |
| USP53     | DC | 48.80% | 31.20% | 0.30 | 2.93E-06 |
| IL1A      | DC | 43.80% | 25.70% | 0.38 | 3.56E-06 |
| CORO1A    | DC | 66.90% | 48.50% | 0.26 | 3.72E-06 |
| TANK      | DC | 60.00% | 41.20% | 0.26 | 3.86E-06 |
| TOP1      | DC | 57.20% | 39.80% | 0.29 | 4.45E-06 |
| ZBTB43    | DC | 41.90% | 24.60% | 0.27 | 4.94E-06 |
| AXL       | DC | 36.20% | 19.60% | 0.30 | 5.14E-06 |
| CD40      | DC | 37.50% | 21.80% | 0.37 | 5.47E-06 |
| GTF2B     | DC | 51.90% | 33.00% | 0.27 | 6.71E-06 |
| PPP1R15B  | DC | 47.80% | 30.20% | 0.27 | 6.73E-06 |

|               |    |        |        |      |          |
|---------------|----|--------|--------|------|----------|
| EIF4A3        | DC | 71.90% | 60.80% | 0.49 | 1.02E-05 |
| MYO1G         | DC | 41.20% | 24.50% | 0.26 | 1.41E-05 |
| HCAR2         | DC | 23.10% | 10.40% | 0.32 | 2.07E-05 |
| PTTG1         | DC | 33.10% | 17.90% | 0.29 | 2.13E-05 |
| SOCS3         | DC | 66.90% | 48.90% | 0.34 | 2.17E-05 |
| VMP1          | DC | 62.20% | 45.10% | 0.33 | 2.23E-05 |
| CKLF          | DC | 56.90% | 40.80% | 0.32 | 3.34E-05 |
| DNAJB4        | DC | 34.10% | 18.70% | 0.29 | 3.56E-05 |
| ARID4B        | DC | 56.60% | 40.10% | 0.29 | 3.77E-05 |
| LPAR6         | DC | 37.20% | 22.00% | 0.39 | 5.41E-05 |
| SRSF5         | DC | 83.80% | 73.60% | 0.31 | 6.76E-05 |
| UBE2S         | DC | 49.70% | 32.60% | 0.26 | 6.98E-05 |
| SOX4          | DC | 37.20% | 21.40% | 0.40 | 8.20E-05 |
| OGFRL1        | DC | 43.40% | 26.50% | 0.25 | 8.37E-05 |
| JMJD1C        | DC | 66.20% | 51.60% | 0.37 | 9.84E-05 |
| HSPA8         | DC | 92.50% | 89.80% | 0.37 | 1.05E-04 |
| CLEC7A        | DC | 65.00% | 47.50% | 0.28 | 1.24E-04 |
| IRF8          | DC | 62.50% | 48.90% | 0.45 | 1.24E-04 |
| AHR           | DC | 66.60% | 51.50% | 0.28 | 1.28E-04 |
| CTA-29F11.1   | DC | 32.20% | 18.00% | 0.26 | 1.45E-04 |
| CSNK1D        | DC | 42.50% | 26.70% | 0.26 | 1.77E-04 |
| KPNA2         | DC | 50.90% | 34.00% | 0.29 | 1.82E-04 |
| ZNF267        | DC | 55.00% | 39.60% | 0.29 | 2.98E-04 |
| SFPQ          | DC | 77.20% | 65.70% | 0.28 | 4.40E-04 |
| CXCL2         | DC | 84.10% | 73.90% | 0.38 | 5.45E-04 |
| ATP13A3       | DC | 51.60% | 34.60% | 0.26 | 8.03E-04 |
| BTG2          | DC | 58.80% | 43.30% | 0.31 | 1.01E-03 |
| DNAJA1        | DC | 89.40% | 82.00% | 0.40 | 1.05E-03 |
| CHD1          | DC | 48.80% | 33.50% | 0.25 | 1.45E-03 |
| CCNL1         | DC | 77.80% | 64.20% | 0.28 | 1.52E-03 |
| PNRC1         | DC | 88.10% | 76.20% | 0.33 | 1.87E-03 |
| PPP1CB        | DC | 64.40% | 50.60% | 0.27 | 2.28E-03 |
| DDX3X         | DC | 81.20% | 73.80% | 0.27 | 4.29E-03 |
| PTGER2        | DC | 34.70% | 21.60% | 0.30 | 4.82E-03 |
| CLK1          | DC | 65.00% | 53.10% | 0.30 | 5.04E-03 |
| YPEL5         | DC | 59.40% | 48.20% | 0.37 | 6.74E-03 |
| TIMP1         | DC | 90.30% | 82.00% | 0.34 | 1.81E-02 |
| RP11-386I14.4 | DC | 26.90% | 15.50% | 0.32 | 1.85E-02 |
| B4GALT1       | DC | 45.00% | 32.60% | 0.37 | 1.94E-02 |
| MAP1LC3B      | DC | 81.60% | 72.60% | 0.29 | 2.18E-02 |
| YME1L1        | DC | 57.20% | 44.90% | 0.29 | 3.16E-02 |

|               |      |        |        |      |           |
|---------------|------|--------|--------|------|-----------|
| PRDM1         | DC   | 37.50% | 24.50% | 0.26 | 4.55E-02  |
| ZFAND2A       | DC   | 34.40% | 22.20% | 0.27 | 5.96E-02  |
| FABP5         | DC   | 68.40% | 55.70% | 0.33 | 7.29E-02  |
| RAB11FIP1     | DC   | 35.00% | 23.50% | 0.27 | 1.11E-01  |
| ITGA5         | DC   | 43.40% | 32.20% | 0.25 | 1.12E-01  |
| RIT1          | DC   | 48.80% | 36.00% | 0.30 | 1.14E-01  |
| BHLHE40       | DC   | 59.70% | 47.60% | 0.29 | 1.74E-01  |
| RAB9A         | DC   | 29.10% | 19.00% | 0.39 | 1.88E-01  |
| RNASET2       | DC   | 73.10% | 67.70% | 0.27 | 2.02E-01  |
| FILIP1L       | DC   | 60.30% | 50.80% | 0.33 | 6.64E-01  |
| CKS2          | DC   | 52.50% | 46.20% | 0.41 | 8.59E-01  |
| RGCC          | DC   | 62.80% | 53.40% | 0.26 | 1.00E+00  |
| ATF3          | DC   | 71.60% | 61.00% | 0.38 | 1.00E+00  |
| WSB1          | DC   | 72.50% | 67.10% | 0.27 | 1.00E+00  |
| ILF3-AS1      | DC   | 18.40% | 11.10% | 0.27 | 1.00E+00  |
| VMO1          | DC   | 40.30% | 30.30% | 0.26 | 1.00E+00  |
| NR4A2         | DC   | 73.40% | 66.50% | 0.43 | 1.00E+00  |
| NDUFV2        | DC   | 56.90% | 51.00% | 0.27 | 1.00E+00  |
| TSHZ2         | iFIB | 59.80% | 1.60%  | 0.70 | 1.97E-120 |
| SSPN          | iFIB | 60.80% | 1.90%  | 0.70 | 3.41E-117 |
| MEG3          | iFIB | 70.10% | 3.90%  | 1.22 | 7.87E-110 |
| CALD1         | iFIB | 90.70% | 10.30% | 1.43 | 8.58E-107 |
| COL14A1       | iFIB | 62.90% | 3.10%  | 1.25 | 3.76E-105 |
| PRRX1         | iFIB | 68.00% | 3.80%  | 0.83 | 5.58E-104 |
| CNN3          | iFIB | 71.10% | 4.70%  | 0.82 | 1.54E-101 |
| MFAP4         | iFIB | 73.20% | 5.30%  | 1.04 | 2.27E-100 |
| ANGPTL2       | iFIB | 91.80% | 12.20% | 1.52 | 6.86E-98  |
| NFIB          | iFIB | 50.50% | 1.50%  | 0.59 | 6.22E-97  |
| EBF1          | iFIB | 54.60% | 2.10%  | 0.53 | 1.63E-95  |
| MEDAG         | iFIB | 60.80% | 3.20%  | 0.68 | 1.12E-93  |
| LAMA4         | iFIB | 54.60% | 2.40%  | 0.55 | 7.03E-91  |
| ISLR          | iFIB | 80.40% | 8.40%  | 1.18 | 1.06E-88  |
| TPD52L1       | iFIB | 52.60% | 2.20%  | 0.55 | 1.40E-88  |
| LHFP          | iFIB | 74.20% | 6.50%  | 0.85 | 3.64E-88  |
| MFGE8         | iFIB | 74.20% | 6.80%  | 1.11 | 1.74E-87  |
| FKBP10        | iFIB | 63.90% | 4.30%  | 0.66 | 3.10E-87  |
| RP11-572C15.6 | iFIB | 48.50% | 1.80%  | 0.54 | 3.54E-85  |
| MAP1A         | iFIB | 69.10% | 5.50%  | 0.73 | 1.16E-84  |
| CCDC80        | iFIB | 89.70% | 14.40% | 1.60 | 1.01E-82  |
| C1R           | iFIB | 91.80% | 16.10% | 1.88 | 2.21E-82  |
| LIMA1         | iFIB | 84.50% | 11.00% | 1.04 | 3.08E-82  |

|         |      |        |        |      |          |
|---------|------|--------|--------|------|----------|
| MXRA8   | iFIB | 66.00% | 5.20%  | 0.87 | 3.43E-82 |
| CAV1    | iFIB | 81.40% | 10.20% | 1.27 | 3.54E-82 |
| ANGPTL1 | iFIB | 50.50% | 2.30%  | 0.59 | 4.78E-82 |
| PCOLCE  | iFIB | 91.80% | 16.40% | 1.68 | 1.15E-81 |
| GLT8D2  | iFIB | 45.40% | 1.60%  | 0.44 | 3.23E-81 |
| FOXC1   | iFIB | 48.50% | 2.10%  | 0.51 | 9.17E-81 |
| C1QTNF3 | iFIB | 52.60% | 2.80%  | 0.76 | 1.42E-80 |
| RERG    | iFIB | 53.60% | 2.90%  | 0.60 | 2.55E-80 |
| ECM2    | iFIB | 48.50% | 2.10%  | 0.61 | 2.69E-80 |
| MT1M    | iFIB | 70.10% | 6.60%  | 1.12 | 4.05E-80 |
| EFEMP2  | iFIB | 51.50% | 2.60%  | 0.54 | 6.94E-80 |
| COL6A2  | iFIB | 93.80% | 19.90% | 1.92 | 8.80E-80 |
| FXYD1   | iFIB | 66.00% | 5.40%  | 0.60 | 4.89E-79 |
| FSTL1   | iFIB | 85.60% | 13.70% | 1.52 | 9.47E-79 |
| DDR2    | iFIB | 54.60% | 3.20%  | 0.61 | 4.01E-78 |
| CFI     | iFIB | 54.60% | 3.20%  | 0.61 | 4.50E-78 |
| PLAC9   | iFIB | 91.80% | 17.20% | 1.69 | 3.76E-77 |
| ABI3BP  | iFIB | 76.30% | 8.80%  | 0.91 | 2.15E-76 |
| COL5A2  | iFIB | 58.80% | 4.20%  | 0.76 | 2.41E-76 |
| ANGPTL4 | iFIB | 76.30% | 9.40%  | 1.26 | 5.40E-76 |
| TNXB    | iFIB | 81.40% | 12.10% | 1.33 | 1.28E-75 |
| AEBP1   | iFIB | 58.80% | 4.70%  | 0.83 | 8.88E-74 |
| FBN1    | iFIB | 54.60% | 3.70%  | 0.71 | 1.21E-73 |
| VASN    | iFIB | 67.00% | 6.50%  | 0.89 | 1.68E-73 |
| CRYAB   | iFIB | 66.00% | 6.50%  | 0.92 | 8.46E-73 |
| SCARA5  | iFIB | 48.50% | 2.70%  | 0.68 | 1.80E-72 |
| COL6A1  | iFIB | 88.70% | 17.00% | 1.49 | 4.15E-72 |
| NT5E    | iFIB | 50.50% | 2.90%  | 0.45 | 1.16E-71 |
| NNMT    | iFIB | 93.80% | 23.10% | 1.80 | 2.27E-71 |
| TMEM45A | iFIB | 53.60% | 3.50%  | 0.46 | 2.47E-71 |
| CYR61   | iFIB | 69.10% | 7.70%  | 1.04 | 4.06E-71 |
| PDLIM4  | iFIB | 63.90% | 5.80%  | 0.63 | 5.34E-71 |
| PDGFRA  | iFIB | 54.60% | 3.90%  | 0.63 | 7.07E-71 |
| PDLIM3  | iFIB | 50.50% | 3.00%  | 0.52 | 8.69E-71 |
| PDGFR   | iFIB | 60.80% | 5.40%  | 0.77 | 1.26E-70 |
| COL1A2  | iFIB | 99.00% | 29.70% | 2.26 | 4.49E-70 |
| LRRN4CL | iFIB | 37.10% | 1.10%  | 0.35 | 3.20E-69 |
| COL6A3  | iFIB | 84.50% | 14.10% | 1.32 | 3.34E-69 |
| DLC1    | iFIB | 44.30% | 2.10%  | 0.37 | 5.02E-68 |
| PTPRS   | iFIB | 46.40% | 2.60%  | 0.77 | 9.07E-68 |
| IFITM1  | iFIB | 37.10% | 1.20%  | 0.42 | 1.49E-67 |

|          |      |        |        |      |          |
|----------|------|--------|--------|------|----------|
| PDGFD    | iFIB | 43.30% | 2.10%  | 0.38 | 1.60E-67 |
| CTGF     | iFIB | 86.60% | 15.50% | 1.46 | 1.87E-67 |
| ENAH     | iFIB | 57.70% | 4.70%  | 0.50 | 2.18E-67 |
| CRISPLD1 | iFIB | 41.20% | 1.80%  | 0.42 | 5.72E-66 |
| NTN4     | iFIB | 39.20% | 1.60%  | 0.38 | 4.39E-65 |
| MRGPRF   | iFIB | 35.10% | 1.00%  | 0.34 | 5.16E-65 |
| MRC2     | iFIB | 51.50% | 3.80%  | 0.53 | 1.92E-64 |
| ENPP1    | iFIB | 49.50% | 3.50%  | 0.64 | 4.63E-64 |
| THBS3    | iFIB | 57.70% | 5.20%  | 0.57 | 1.29E-63 |
| CFH      | iFIB | 64.90% | 7.70%  | 1.11 | 7.56E-63 |
| HSPB8    | iFIB | 46.40% | 2.90%  | 0.52 | 8.63E-63 |
| C1S      | iFIB | 87.60% | 20.80% | 1.65 | 1.01E-62 |
| COX7A1   | iFIB | 71.10% | 9.30%  | 0.79 | 1.16E-62 |
| MT1E     | iFIB | 82.50% | 14.90% | 1.37 | 2.24E-62 |
| SNED1    | iFIB | 39.20% | 1.70%  | 0.36 | 2.53E-62 |
| FAM134B  | iFIB | 56.70% | 5.10%  | 0.54 | 3.44E-61 |
| WWTR1    | iFIB | 45.40% | 2.80%  | 0.36 | 3.85E-61 |
| TMEM100  | iFIB | 44.30% | 2.70%  | 0.51 | 4.63E-61 |
| FILIP1   | iFIB | 25.80% | 0.20%  | 0.28 | 6.39E-61 |
| COL8A1   | iFIB | 35.10% | 1.30%  | 0.41 | 1.19E-60 |
| THBS4    | iFIB | 59.80% | 6.30%  | 0.78 | 5.19E-60 |
| SPARCL1  | iFIB | 86.60% | 19.70% | 1.78 | 8.72E-60 |
| FGF10    | iFIB | 35.10% | 1.30%  | 0.35 | 2.08E-59 |
| NOVA1    | iFIB | 37.10% | 1.70%  | 0.44 | 3.32E-59 |
| EFEMP1   | iFIB | 77.30% | 13.30% | 1.32 | 4.37E-59 |
| OSR2     | iFIB | 53.60% | 4.80%  | 0.62 | 6.04E-59 |
| FBLN2    | iFIB | 44.30% | 2.80%  | 0.50 | 8.36E-59 |
| PCOLCE2  | iFIB | 71.10% | 11.30% | 1.30 | 1.04E-58 |
| GULP1    | iFIB | 33.00% | 1.10%  | 0.29 | 1.51E-58 |
| PAM      | iFIB | 75.30% | 10.60% | 0.61 | 2.01E-58 |
| SPTBN1   | iFIB | 50.50% | 4.00%  | 0.40 | 3.10E-58 |
| C1orf21  | iFIB | 46.40% | 3.30%  | 0.43 | 3.57E-58 |
| SEMA3C   | iFIB | 54.60% | 5.00%  | 0.59 | 5.17E-58 |
| PLOD2    | iFIB | 41.20% | 2.40%  | 0.35 | 7.17E-58 |
| FBLN1    | iFIB | 37.10% | 1.70%  | 0.49 | 1.46E-57 |
| CRLF1    | iFIB | 53.60% | 5.10%  | 0.77 | 1.72E-57 |
| WISP2    | iFIB | 74.20% | 12.90% | 1.64 | 2.01E-57 |
| S1PR3    | iFIB | 38.10% | 1.90%  | 0.40 | 2.04E-57 |
| NGFRAP1  | iFIB | 61.90% | 7.30%  | 0.69 | 2.34E-57 |
| MAP1B    | iFIB | 33.00% | 1.20%  | 0.47 | 3.53E-57 |
| OGN      | iFIB | 58.80% | 6.70%  | 1.02 | 4.76E-57 |

|          |      |         |        |      |          |
|----------|------|---------|--------|------|----------|
| CERCAM   | iFIB | 47.40%  | 3.60%  | 0.45 | 8.34E-57 |
| GFPT2    | iFIB | 66.00%  | 8.60%  | 0.81 | 2.32E-56 |
| ABLIM1   | iFIB | 34.00%  | 1.30%  | 0.30 | 4.06E-56 |
| MGST1    | iFIB | 55.70%  | 5.80%  | 0.64 | 6.64E-56 |
| PPAP2A   | iFIB | 64.90%  | 8.90%  | 0.85 | 1.03E-55 |
| STEAP4   | iFIB | 40.20%  | 2.40%  | 0.60 | 1.10E-55 |
| HAS1     | iFIB | 76.30%  | 12.50% | 1.17 | 1.55E-55 |
| THY1     | iFIB | 57.70%  | 6.70%  | 0.94 | 1.74E-55 |
| FHL1     | iFIB | 79.40%  | 15.80% | 1.29 | 2.11E-55 |
| RCN3     | iFIB | 68.00%  | 9.40%  | 0.70 | 2.20E-55 |
| CTTN     | iFIB | 53.60%  | 5.00%  | 0.52 | 2.30E-55 |
| AKR1C1   | iFIB | 59.80%  | 6.80%  | 0.64 | 5.04E-55 |
| GPRC5A   | iFIB | 74.20%  | 12.40% | 0.91 | 7.42E-55 |
| TMEM98   | iFIB | 34.00%  | 1.40%  | 0.31 | 8.09E-55 |
| LARP6    | iFIB | 35.10%  | 1.60%  | 0.30 | 1.32E-54 |
| C9orf3   | iFIB | 40.20%  | 2.40%  | 0.37 | 1.90E-54 |
| MYL9     | iFIB | 69.10%  | 10.40% | 0.91 | 1.94E-54 |
| ADAMTS1  | iFIB | 49.50%  | 4.30%  | 0.60 | 2.12E-54 |
| LTBP4    | iFIB | 56.70%  | 6.30%  | 0.73 | 2.66E-54 |
| MGP      | iFIB | 99.00%  | 58.70% | 2.46 | 2.73E-54 |
| SMOC2    | iFIB | 36.10%  | 1.80%  | 0.47 | 5.54E-54 |
| BGN      | iFIB | 87.60%  | 26.50% | 1.84 | 7.00E-54 |
| NBL1     | iFIB | 69.10%  | 10.30% | 0.84 | 1.46E-53 |
| DPT      | iFIB | 82.50%  | 19.80% | 1.75 | 7.29E-53 |
| LUM      | iFIB | 100.00% | 59.80% | 2.38 | 8.54E-53 |
| SGCE     | iFIB | 33.00%  | 1.40%  | 0.36 | 8.94E-53 |
| ZNF385D  | iFIB | 33.00%  | 1.40%  | 0.31 | 1.02E-52 |
| ELN      | iFIB | 38.10%  | 2.30%  | 0.45 | 2.43E-52 |
| DCN      | iFIB | 97.90%  | 56.40% | 2.63 | 5.10E-52 |
| GPX8     | iFIB | 45.40%  | 3.60%  | 0.38 | 7.46E-52 |
| IGFBP5   | iFIB | 56.70%  | 6.90%  | 1.36 | 1.17E-51 |
| GJA1     | iFIB | 43.30%  | 3.20%  | 0.41 | 1.26E-51 |
| CD248    | iFIB | 34.00%  | 1.70%  | 0.38 | 1.93E-51 |
| CDO1     | iFIB | 56.70%  | 7.00%  | 0.92 | 4.38E-51 |
| SFRP1    | iFIB | 36.10%  | 2.10%  | 0.56 | 4.55E-51 |
| C11orf96 | iFIB | 49.50%  | 4.90%  | 0.61 | 5.48E-51 |
| P4HA2    | iFIB | 57.70%  | 6.50%  | 0.40 | 6.13E-51 |
| ERRFI1   | iFIB | 90.70%  | 23.80% | 1.41 | 9.36E-51 |
| PDPN     | iFIB | 54.60%  | 5.90%  | 0.49 | 1.33E-50 |
| IGFBP6   | iFIB | 88.70%  | 24.80% | 1.93 | 2.88E-50 |
| MT1A     | iFIB | 55.70%  | 6.90%  | 1.07 | 3.03E-50 |

|          |      |        |        |      |          |
|----------|------|--------|--------|------|----------|
| A4GALT   | iFIB | 36.10% | 2.10%  | 0.34 | 3.29E-50 |
| SGCD     | iFIB | 30.90% | 1.30%  | 0.27 | 3.46E-50 |
| ANKRD35  | iFIB | 30.90% | 1.30%  | 0.27 | 3.65E-50 |
| CP       | iFIB | 34.00% | 1.70%  | 0.57 | 4.08E-50 |
| C2orf40  | iFIB | 67.00% | 10.70% | 1.04 | 4.43E-50 |
| PPAP2B   | iFIB | 67.00% | 10.30% | 0.90 | 1.36E-49 |
| FMOD     | iFIB | 66.00% | 10.40% | 1.01 | 1.43E-49 |
| CDON     | iFIB | 41.20% | 3.00%  | 0.34 | 1.57E-49 |
| GALNT15  | iFIB | 34.00% | 1.80%  | 0.39 | 3.21E-49 |
| NTRK2    | iFIB | 32.00% | 1.50%  | 0.44 | 3.79E-49 |
| FAP      | iFIB | 38.10% | 2.50%  | 0.36 | 5.94E-49 |
| PTRF     | iFIB | 79.40% | 16.50% | 0.94 | 8.00E-49 |
| SNAI2    | iFIB | 32.00% | 1.50%  | 0.38 | 8.74E-49 |
| MXRA5    | iFIB | 42.30% | 3.40%  | 0.52 | 8.86E-49 |
| F5       | iFIB | 34.00% | 1.80%  | 0.38 | 9.70E-49 |
| SPON2    | iFIB | 35.10% | 2.10%  | 0.63 | 2.28E-48 |
| TMEM196  | iFIB | 33.00% | 1.70%  | 0.46 | 2.92E-48 |
| PLA2G2A  | iFIB | 97.90% | 58.30% | 3.05 | 4.23E-48 |
| ASPN     | iFIB | 80.40% | 21.90% | 2.12 | 6.86E-48 |
| LBH      | iFIB | 62.90% | 9.00%  | 0.62 | 8.05E-48 |
| DKK3     | iFIB | 52.60% | 6.30%  | 0.95 | 9.19E-48 |
| LTBP1    | iFIB | 43.30% | 3.60%  | 0.44 | 9.76E-48 |
| RBMS3    | iFIB | 36.10% | 2.20%  | 0.25 | 2.10E-47 |
| AUTS2    | iFIB | 36.10% | 2.30%  | 0.37 | 4.30E-47 |
| ACKR3    | iFIB | 50.50% | 5.50%  | 0.59 | 6.48E-47 |
| S100A16  | iFIB | 39.20% | 2.80%  | 0.32 | 1.01E-46 |
| STEAP1   | iFIB | 35.10% | 2.10%  | 0.33 | 1.31E-46 |
| FAM114A1 | iFIB | 60.80% | 8.40%  | 0.55 | 2.05E-46 |
| SERPING1 | iFIB | 90.70% | 31.80% | 1.17 | 2.80E-46 |
| PLS3     | iFIB | 50.50% | 5.40%  | 0.37 | 3.58E-46 |
| RBFOX2   | iFIB | 34.00% | 2.00%  | 0.26 | 3.91E-46 |
| PFN2     | iFIB | 34.00% | 2.00%  | 0.26 | 4.98E-46 |
| DBN1     | iFIB | 30.90% | 1.50%  | 0.30 | 5.29E-46 |
| STEAP2   | iFIB | 26.80% | 0.90%  | 0.28 | 8.46E-46 |
| SELM     | iFIB | 96.90% | 37.40% | 1.06 | 1.07E-45 |
| PCDH9    | iFIB | 27.80% | 1.10%  | 0.27 | 1.72E-45 |
| AK1      | iFIB | 79.40% | 19.40% | 1.13 | 7.47E-45 |
| KDELR3   | iFIB | 45.40% | 4.60%  | 0.45 | 2.43E-44 |
| ANK2     | iFIB | 41.20% | 3.60%  | 0.38 | 3.61E-44 |
| COL4A1   | iFIB | 34.00% | 2.10%  | 0.29 | 4.52E-44 |
| FAM180B  | iFIB | 27.80% | 1.20%  | 0.26 | 7.51E-44 |



|          |      |         |        |      |          |
|----------|------|---------|--------|------|----------|
| EFNA5    | iFIB | 24.70%  | 0.80%  | 0.28 | 7.71E-44 |
| SEMA3E   | iFIB | 24.70%  | 0.80%  | 0.26 | 7.71E-44 |
| AKR1C2   | iFIB | 49.50%  | 5.80%  | 0.67 | 8.79E-44 |
| PDGFRB   | iFIB | 39.20%  | 3.20%  | 0.38 | 1.13E-43 |
| PROCR    | iFIB | 52.60%  | 6.90%  | 0.63 | 2.42E-43 |
| FAT1     | iFIB | 26.80%  | 1.10%  | 0.25 | 4.44E-43 |
| PTGES    | iFIB | 37.10%  | 2.80%  | 0.40 | 5.47E-43 |
| TIMP3    | iFIB | 85.60%  | 25.60% | 1.46 | 5.61E-43 |
| COL12A1  | iFIB | 30.90%  | 1.70%  | 0.30 | 1.23E-42 |
| TNC      | iFIB | 68.00%  | 13.90% | 1.13 | 1.58E-42 |
| SLC39A14 | iFIB | 55.70%  | 8.00%  | 0.62 | 2.92E-42 |
| SDC2     | iFIB | 80.40%  | 20.40% | 0.93 | 2.95E-42 |
| CRABP2   | iFIB | 40.20%  | 3.70%  | 0.69 | 4.00E-42 |
| THBS2    | iFIB | 33.00%  | 2.10%  | 0.34 | 4.01E-42 |
| TNFAIP6  | iFIB | 84.50%  | 24.60% | 1.44 | 1.60E-41 |
| FHL2     | iFIB | 32.00%  | 2.10%  | 0.32 | 2.46E-41 |
| FN1      | iFIB | 100.00% | 79.70% | 2.03 | 4.66E-41 |
| RAMP2    | iFIB | 35.10%  | 2.50%  | 0.26 | 5.46E-41 |
| PKIG     | iFIB | 44.30%  | 4.70%  | 0.37 | 9.07E-41 |
| SCARA3   | iFIB | 37.10%  | 3.10%  | 0.32 | 3.13E-40 |
| CADM3    | iFIB | 28.90%  | 1.60%  | 0.27 | 4.25E-40 |
| FNDC1    | iFIB | 28.90%  | 1.60%  | 0.33 | 4.78E-40 |
| FAM180A  | iFIB | 27.80%  | 1.40%  | 0.32 | 4.89E-40 |
| SRPX     | iFIB | 25.80%  | 1.10%  | 0.28 | 5.37E-40 |
| NFIX     | iFIB | 47.40%  | 5.40%  | 0.38 | 8.64E-40 |
| COL5A1   | iFIB | 37.10%  | 3.20%  | 0.49 | 9.25E-40 |
| VCAM1    | iFIB | 43.30%  | 4.70%  | 0.73 | 1.08E-39 |
| HSD3B7   | iFIB | 66.00%  | 12.90% | 0.72 | 1.37E-39 |
| UGDH     | iFIB | 67.00%  | 14.00% | 0.89 | 1.60E-39 |
| SSC5D    | iFIB | 40.20%  | 3.90%  | 0.36 | 1.98E-39 |
| PRELP    | iFIB | 80.40%  | 23.70% | 1.63 | 3.96E-39 |
| MT2A     | iFIB | 99.00%  | 71.50% | 1.79 | 8.17E-39 |
| C16orf45 | iFIB | 35.10%  | 2.80%  | 0.31 | 1.78E-38 |
| SMARCA1  | iFIB | 29.90%  | 1.90%  | 0.30 | 1.90E-38 |
| CXCL12   | iFIB | 60.80%  | 11.20% | 1.26 | 2.68E-38 |
| PTN      | iFIB | 20.60%  | 0.60%  | 0.35 | 3.27E-38 |
| GLI3     | iFIB | 25.80%  | 1.30%  | 0.26 | 5.79E-38 |
| SPARC    | iFIB | 88.70%  | 29.80% | 1.32 | 7.46E-38 |
| MMP2     | iFIB | 71.10%  | 17.90% | 1.19 | 7.75E-38 |
| SULF1    | iFIB | 33.00%  | 2.50%  | 0.30 | 2.16E-37 |
| PRKCDBP  | iFIB | 83.50%  | 23.10% | 0.80 | 2.27E-37 |

|            |      |        |        |      |          |
|------------|------|--------|--------|------|----------|
| EMP2       | iFIB | 72.20% | 16.30% | 0.68 | 2.41E-37 |
| AQP1       | iFIB | 80.40% | 24.40% | 1.24 | 4.38E-37 |
| COL1A1     | iFIB | 67.00% | 16.30% | 2.33 | 5.91E-37 |
| CSGALNACT1 | iFIB | 32.00% | 2.40%  | 0.28 | 7.44E-37 |
| DEFB1      | iFIB | 50.50% | 7.50%  | 0.83 | 8.95E-37 |
| LY6E       | iFIB | 74.20% | 17.40% | 0.78 | 3.77E-36 |
| FKBP7      | iFIB | 36.10% | 3.30%  | 0.26 | 5.51E-36 |
| TCEA3      | iFIB | 33.00% | 2.70%  | 0.27 | 5.82E-36 |
| SERPINH1   | iFIB | 61.90% | 11.10% | 0.49 | 6.42E-36 |
| MFAP5      | iFIB | 37.10% | 3.80%  | 1.16 | 1.34E-35 |
| COL4A2     | iFIB | 34.00% | 2.90%  | 0.38 | 1.34E-35 |
| MYC        | iFIB | 78.40% | 21.80% | 0.92 | 1.58E-35 |
| GAS1       | iFIB | 26.80% | 1.60%  | 0.27 | 1.95E-35 |
| ASS1       | iFIB | 26.80% | 1.70%  | 0.29 | 7.86E-35 |
| CRTAC1     | iFIB | 94.80% | 52.50% | 2.16 | 1.03E-34 |
| LPAR1      | iFIB | 40.20% | 4.50%  | 0.34 | 2.29E-34 |
| LTBP3      | iFIB | 44.30% | 5.80%  | 0.42 | 1.37E-33 |
| GAP43      | iFIB | 20.60% | 0.80%  | 0.30 | 2.26E-33 |
| CLU        | iFIB | 99.00% | 67.60% | 1.91 | 2.43E-33 |
| SOX9       | iFIB | 23.70% | 1.30%  | 0.28 | 5.80E-33 |
| ITGB8      | iFIB | 45.40% | 6.20%  | 0.42 | 1.34E-32 |
| TPM2       | iFIB | 51.50% | 8.40%  | 0.49 | 1.67E-32 |
| SGCB       | iFIB | 37.10% | 4.00%  | 0.27 | 2.11E-32 |
| ID3        | iFIB | 82.50% | 25.70% | 0.96 | 2.18E-32 |
| PRG4       | iFIB | 97.90% | 76.60% | 2.41 | 2.53E-32 |
| GPX3       | iFIB | 88.70% | 34.70% | 1.05 | 3.77E-32 |
| KCNE4      | iFIB | 24.70% | 1.50%  | 0.33 | 5.20E-32 |
| CHST12     | iFIB | 44.30% | 6.00%  | 0.36 | 6.02E-32 |
| IGFBP4     | iFIB | 81.40% | 24.50% | 1.05 | 8.98E-32 |
| GEM        | iFIB | 86.60% | 30.50% | 1.19 | 1.85E-31 |
| TNFRSF11B  | iFIB | 37.10% | 4.40%  | 0.45 | 2.38E-31 |
| CRISPLD2   | iFIB | 43.30% | 5.80%  | 0.42 | 2.50E-31 |
| FGFBP2     | iFIB | 47.40% | 8.10%  | 1.39 | 2.61E-31 |
| PTHLH      | iFIB | 24.70% | 1.60%  | 0.32 | 3.98E-31 |
| MYL6B      | iFIB | 50.50% | 8.00%  | 0.32 | 5.32E-31 |
| HSPG2      | iFIB | 40.20% | 5.00%  | 0.33 | 6.47E-31 |
| PLEKHA4    | iFIB | 39.20% | 4.80%  | 0.31 | 9.91E-31 |
| INHBA      | iFIB | 68.00% | 16.10% | 1.29 | 1.29E-30 |
| NDUFA4L2   | iFIB | 64.90% | 18.30% | 1.52 | 1.35E-30 |
| SFRP4      | iFIB | 32.00% | 3.20%  | 0.81 | 1.56E-30 |
| RGS3       | iFIB | 36.10% | 4.00%  | 0.34 | 1.56E-30 |

|            |      |        |        |      |          |
|------------|------|--------|--------|------|----------|
| ITM2C      | iFIB | 49.50% | 8.10%  | 0.47 | 1.57E-30 |
| PARVA      | iFIB | 37.10% | 4.30%  | 0.27 | 2.02E-30 |
| GOLM1      | iFIB | 40.20% | 5.20%  | 0.36 | 2.21E-30 |
| CNPY4      | iFIB | 35.10% | 3.80%  | 0.25 | 3.40E-30 |
| SOX4       | iFIB | 78.40% | 21.00% | 0.63 | 4.30E-30 |
| ARID5B     | iFIB | 91.80% | 31.80% | 0.82 | 4.41E-30 |
| RCN1       | iFIB | 51.50% | 8.60%  | 0.35 | 6.97E-30 |
| LGALS3BP   | iFIB | 67.00% | 16.10% | 0.61 | 1.91E-29 |
| TGFBR3     | iFIB | 48.50% | 8.00%  | 0.45 | 2.30E-29 |
| CYB5R3     | iFIB | 90.70% | 37.90% | 0.77 | 2.52E-29 |
| BDH2       | iFIB | 52.60% | 8.90%  | 0.32 | 3.38E-29 |
| SEMA5A     | iFIB | 17.50% | 0.60%  | 0.31 | 1.05E-28 |
| WBP5       | iFIB | 84.50% | 25.80% | 0.63 | 1.71E-28 |
| GGT5       | iFIB | 18.60% | 0.80%  | 0.36 | 2.20E-28 |
| COL3A1     | iFIB | 78.40% | 29.10% | 2.16 | 2.34E-28 |
| DIO2       | iFIB | 26.80% | 2.20%  | 0.35 | 2.66E-28 |
| CAPS       | iFIB | 35.10% | 4.30%  | 0.42 | 4.36E-28 |
| TPPP3      | iFIB | 89.70% | 46.80% | 1.17 | 6.51E-28 |
| CES1       | iFIB | 34.00% | 3.90%  | 0.30 | 8.65E-28 |
| SCRG1      | iFIB | 39.20% | 5.70%  | 0.64 | 9.28E-28 |
| TM4SF1     | iFIB | 51.50% | 9.80%  | 0.48 | 1.05E-27 |
| ADD3       | iFIB | 42.30% | 6.20%  | 0.30 | 1.41E-27 |
| ST6GALNAC6 | iFIB | 47.40% | 8.00%  | 0.34 | 5.17E-27 |
| CDA        | iFIB | 23.70% | 1.70%  | 0.28 | 5.19E-27 |
| SCG2       | iFIB | 18.60% | 0.90%  | 0.29 | 6.36E-27 |
| PRSS23     | iFIB | 76.30% | 26.40% | 1.03 | 1.98E-26 |
| SFRP2      | iFIB | 24.70% | 2.10%  | 0.76 | 3.14E-26 |
| UAP1       | iFIB | 82.50% | 29.30% | 0.79 | 4.36E-26 |
| SORBS2     | iFIB | 24.70% | 2.10%  | 0.28 | 5.19E-26 |
| COMP       | iFIB | 84.50% | 38.40% | 2.06 | 5.27E-26 |
| P4HA3      | iFIB | 27.80% | 2.70%  | 0.25 | 6.18E-26 |
| PPA1       | iFIB | 72.20% | 19.30% | 0.48 | 8.47E-26 |
| PTPRG      | iFIB | 29.90% | 3.20%  | 0.25 | 8.72E-26 |
| LDHA       | iFIB | 99.00% | 77.90% | 0.79 | 1.05E-25 |
| MAGED1     | iFIB | 38.10% | 5.40%  | 0.25 | 1.46E-25 |
| COL18A1    | iFIB | 32.00% | 3.70%  | 0.25 | 2.06E-25 |
| FKBP9      | iFIB | 47.40% | 8.40%  | 0.33 | 2.48E-25 |
| VKORC1     | iFIB | 88.70% | 35.50% | 0.73 | 2.56E-25 |
| ADIRF      | iFIB | 94.80% | 50.00% | 0.92 | 2.64E-25 |
| IFT57      | iFIB | 50.50% | 9.60%  | 0.36 | 2.70E-25 |
| LAPTM4A    | iFIB | 97.90% | 77.00% | 0.80 | 3.33E-25 |

|           |      |        |        |      |          |
|-----------|------|--------|--------|------|----------|
| IFITM3    | iFIB | 95.90% | 66.10% | 0.92 | 5.83E-25 |
| NUCB2     | iFIB | 67.00% | 16.40% | 0.42 | 9.16E-25 |
| DUSP14    | iFIB | 49.50% | 9.50%  | 0.38 | 1.39E-24 |
| PPIC      | iFIB | 78.40% | 25.50% | 0.59 | 1.92E-24 |
| COPZ2     | iFIB | 40.20% | 6.20%  | 0.25 | 2.71E-24 |
| AHI1      | iFIB | 74.20% | 19.80% | 0.51 | 3.00E-24 |
| REXO2     | iFIB | 77.30% | 28.90% | 0.75 | 3.73E-24 |
| ANTXR1    | iFIB | 43.30% | 7.30%  | 0.36 | 5.29E-24 |
| CHPF      | iFIB | 29.90% | 3.50%  | 0.26 | 8.63E-24 |
| SERPINE2  | iFIB | 30.90% | 3.90%  | 0.43 | 1.21E-23 |
| OLFML3    | iFIB | 36.10% | 5.30%  | 0.35 | 1.33E-23 |
| SMIM14    | iFIB | 72.20% | 21.90% | 0.59 | 1.98E-23 |
| S100A13   | iFIB | 77.30% | 30.20% | 0.79 | 2.13E-23 |
| C8orf4    | iFIB | 21.60% | 1.70%  | 0.44 | 3.80E-23 |
| IL1R1     | iFIB | 44.30% | 7.70%  | 0.30 | 4.90E-23 |
| PDLIM2    | iFIB | 54.60% | 12.30% | 0.37 | 7.02E-22 |
| CILP      | iFIB | 39.20% | 7.00%  | 0.71 | 8.81E-22 |
| CBR3      | iFIB | 52.60% | 11.40% | 0.38 | 9.22E-22 |
| CTHRC1    | iFIB | 20.60% | 1.70%  | 0.39 | 1.24E-21 |
| EPB41L2   | iFIB | 75.30% | 23.80% | 0.50 | 2.48E-21 |
| IFI27     | iFIB | 74.20% | 23.10% | 0.67 | 2.94E-21 |
| PFKP      | iFIB | 67.00% | 19.70% | 0.56 | 5.08E-21 |
| PDGFA     | iFIB | 30.90% | 4.20%  | 0.25 | 9.12E-21 |
| ZBTB20    | iFIB | 55.70% | 12.60% | 0.27 | 3.58E-20 |
| IGF1      | iFIB | 55.70% | 15.90% | 1.19 | 3.88E-20 |
| C12orf57  | iFIB | 81.40% | 36.10% | 0.65 | 4.07E-20 |
| RGS16     | iFIB | 61.90% | 18.50% | 0.73 | 8.14E-20 |
| HTRA1     | iFIB | 91.80% | 52.60% | 1.14 | 9.41E-20 |
| VAMP5     | iFIB | 64.90% | 17.60% | 0.36 | 1.15E-19 |
| VCAN      | iFIB | 75.30% | 30.50% | 0.93 | 1.75E-19 |
| NAV1      | iFIB | 44.30% | 8.90%  | 0.29 | 1.79E-19 |
| MT1X      | iFIB | 83.50% | 39.40% | 1.16 | 1.98E-19 |
| RORA      | iFIB | 43.30% | 8.80%  | 0.32 | 5.18E-19 |
| NFIA      | iFIB | 66.00% | 18.90% | 0.41 | 5.53E-19 |
| PRDX4     | iFIB | 68.00% | 22.30% | 0.47 | 7.46E-19 |
| ARL2      | iFIB | 84.50% | 32.50% | 0.53 | 8.00E-19 |
| TIMP1     | iFIB | 99.00% | 82.80% | 0.79 | 8.10E-19 |
| SBDS      | iFIB | 84.50% | 40.50% | 0.64 | 9.95E-19 |
| TMED3     | iFIB | 59.80% | 16.00% | 0.34 | 1.06E-18 |
| MAP7D3    | iFIB | 43.30% | 8.80%  | 0.27 | 1.42E-18 |
| C1GALT1C1 | iFIB | 45.40% | 9.90%  | 0.27 | 4.71E-18 |

|          |      |        |        |      |          |
|----------|------|--------|--------|------|----------|
| TIMP2    | iFIB | 95.90% | 54.00% | 0.62 | 7.72E-18 |
| PLAGL1   | iFIB | 37.10% | 6.90%  | 0.25 | 1.34E-17 |
| AIG1     | iFIB | 51.50% | 12.30% | 0.26 | 1.89E-17 |
| CYBRD1   | iFIB | 77.30% | 28.80% | 0.47 | 2.74E-17 |
| MATN2    | iFIB | 24.70% | 3.20%  | 0.26 | 3.71E-17 |
| EID1     | iFIB | 93.80% | 59.90% | 0.61 | 4.19E-17 |
| PMEPA1   | iFIB | 61.90% | 18.10% | 0.39 | 4.69E-17 |
| CD151    | iFIB | 87.60% | 49.50% | 0.68 | 5.15E-17 |
| NCOA7    | iFIB | 45.40% | 10.20% | 0.28 | 5.63E-17 |
| FYN      | iFIB | 40.20% | 8.40%  | 0.28 | 7.48E-17 |
| CADM1    | iFIB | 25.80% | 3.60%  | 0.30 | 7.53E-17 |
| NFIC     | iFIB | 79.40% | 32.40% | 0.56 | 1.41E-16 |
| BPGM     | iFIB | 39.20% | 8.10%  | 0.30 | 1.41E-16 |
| RRAS     | iFIB | 46.40% | 10.70% | 0.27 | 2.22E-16 |
| FAM20C   | iFIB | 38.10% | 7.70%  | 0.28 | 2.24E-16 |
| FAM127A  | iFIB | 58.80% | 16.60% | 0.34 | 2.30E-16 |
| PPFIBP1  | iFIB | 41.20% | 8.90%  | 0.28 | 2.51E-16 |
| TWISTNB  | iFIB | 57.70% | 16.70% | 0.60 | 3.43E-16 |
| CREB3L2  | iFIB | 55.70% | 15.20% | 0.35 | 4.10E-16 |
| RARRES2  | iFIB | 15.50% | 1.20%  | 0.25 | 4.94E-16 |
| TUBB2B   | iFIB | 28.90% | 4.70%  | 0.33 | 5.43E-16 |
| FAM3C    | iFIB | 68.00% | 21.70% | 0.39 | 6.97E-16 |
| SLC39A7  | iFIB | 68.00% | 23.00% | 0.39 | 1.95E-15 |
| PDLIM7   | iFIB | 53.60% | 14.70% | 0.33 | 2.76E-15 |
| AP3S1    | iFIB | 80.40% | 32.40% | 0.44 | 2.85E-15 |
| C1GALT1  | iFIB | 37.10% | 7.90%  | 0.32 | 4.29E-15 |
| TAGLN    | iFIB | 47.40% | 13.40% | 0.99 | 6.61E-15 |
| CHI3L2   | iFIB | 26.80% | 4.40%  | 0.74 | 7.20E-15 |
| PRDX2    | iFIB | 72.20% | 26.30% | 0.39 | 1.09E-14 |
| VAMP2    | iFIB | 75.30% | 30.50% | 0.47 | 1.47E-14 |
| COPS8    | iFIB | 55.70% | 16.20% | 0.32 | 2.01E-14 |
| GPAA1    | iFIB | 66.00% | 22.30% | 0.37 | 2.18E-14 |
| LRP1     | iFIB | 95.90% | 49.60% | 0.52 | 2.41E-14 |
| CHI3L1   | iFIB | 28.90% | 5.30%  | 0.83 | 2.45E-14 |
| ID1      | iFIB | 44.30% | 11.40% | 0.47 | 3.68E-14 |
| ERLEC1   | iFIB | 63.90% | 20.20% | 0.31 | 4.08E-14 |
| CTSK     | iFIB | 77.30% | 28.90% | 0.39 | 4.19E-14 |
| PSD3     | iFIB | 56.70% | 16.30% | 0.29 | 5.31E-14 |
| AKR1C3   | iFIB | 38.10% | 8.60%  | 0.29 | 5.54E-14 |
| SLC25A37 | iFIB | 50.50% | 13.80% | 0.38 | 5.61E-14 |
| LRP10    | iFIB | 68.00% | 24.50% | 0.40 | 6.11E-14 |

|           |      |         |        |      |          |
|-----------|------|---------|--------|------|----------|
| S100A8    | iFIB | 43.30%  | 11.50% | 0.83 | 7.78E-14 |
| RRBP1     | iFIB | 86.60%  | 39.60% | 0.46 | 8.07E-14 |
| PROS1     | iFIB | 47.40%  | 12.50% | 0.28 | 9.27E-14 |
| C19orf10  | iFIB | 83.50%  | 42.90% | 0.48 | 1.67E-13 |
| LAMB2     | iFIB | 41.20%  | 10.40% | 0.33 | 2.21E-13 |
| RND3      | iFIB | 68.00%  | 22.70% | 0.35 | 2.53E-13 |
| CCPG1     | iFIB | 77.30%  | 29.80% | 0.42 | 2.54E-13 |
| AXL       | iFIB | 59.80%  | 20.80% | 0.49 | 3.61E-13 |
| CYP1B1    | iFIB | 90.70%  | 49.30% | 0.65 | 5.13E-13 |
| IFI6      | iFIB | 62.90%  | 22.40% | 0.43 | 5.65E-13 |
| SLC29A1   | iFIB | 39.20%  | 9.60%  | 0.31 | 6.34E-13 |
| C1orf122  | iFIB | 63.90%  | 21.90% | 0.35 | 8.82E-13 |
| NDUFC1    | iFIB | 78.40%  | 32.10% | 0.37 | 9.90E-13 |
| OPTN      | iFIB | 48.50%  | 13.70% | 0.28 | 1.91E-12 |
| GABARAPL2 | iFIB | 93.80%  | 56.80% | 0.52 | 1.94E-12 |
| FGFR1     | iFIB | 63.90%  | 23.70% | 0.39 | 2.18E-12 |
| FERMT2    | iFIB | 53.60%  | 16.10% | 0.26 | 3.28E-12 |
| KDELR2    | iFIB | 78.40%  | 36.80% | 0.46 | 4.00E-12 |
| PLEKHA1   | iFIB | 47.40%  | 13.40% | 0.32 | 4.19E-12 |
| HBEGF     | iFIB | 69.10%  | 28.70% | 0.63 | 5.35E-12 |
| CLEC3B    | iFIB | 44.30%  | 11.80% | 0.26 | 5.62E-12 |
| TXNDC15   | iFIB | 52.60%  | 15.90% | 0.26 | 5.95E-12 |
| RHOBTB3   | iFIB | 29.90%  | 6.10%  | 0.25 | 1.15E-11 |
| IGFBP7    | iFIB | 66.00%  | 28.70% | 0.73 | 1.27E-11 |
| CD63      | iFIB | 100.00% | 98.70% | 0.37 | 1.38E-11 |
| CPQ       | iFIB | 60.80%  | 22.50% | 0.35 | 1.44E-11 |
| VGLL4     | iFIB | 42.30%  | 11.50% | 0.27 | 2.14E-11 |
| FAM46A    | iFIB | 60.80%  | 24.50% | 0.62 | 2.26E-11 |
| DST       | iFIB | 81.40%  | 35.80% | 0.40 | 2.33E-11 |
| LTBP2     | iFIB | 39.20%  | 10.30% | 0.31 | 2.56E-11 |
| CD9       | iFIB | 95.90%  | 81.70% | 0.77 | 2.95E-11 |
| RARRES1   | iFIB | 16.50%  | 2.10%  | 0.41 | 3.10E-11 |
| NDRG1     | iFIB | 71.10%  | 26.40% | 0.29 | 3.16E-11 |
| SVIL      | iFIB | 37.10%  | 9.60%  | 0.31 | 3.61E-11 |
| CUX1      | iFIB | 60.80%  | 21.10% | 0.31 | 3.95E-11 |
| OAT       | iFIB | 64.90%  | 24.60% | 0.35 | 4.07E-11 |
| TTC3      | iFIB | 73.20%  | 29.40% | 0.35 | 7.45E-11 |
| TCF4      | iFIB | 74.20%  | 29.90% | 0.37 | 7.65E-11 |
| ZNF503    | iFIB | 50.50%  | 15.90% | 0.31 | 7.92E-11 |
| GLIS3     | iFIB | 43.30%  | 12.40% | 0.29 | 8.79E-11 |
| ANKH      | iFIB | 74.20%  | 33.00% | 0.44 | 1.00E-10 |

|          |      |         |        |      |          |
|----------|------|---------|--------|------|----------|
| TMEM59   | iFIB | 93.80%  | 68.40% | 0.43 | 1.05E-10 |
| PPP1CC   | iFIB | 55.70%  | 19.10% | 0.35 | 1.08E-10 |
| GSN      | iFIB | 93.80%  | 78.40% | 0.59 | 2.26E-10 |
| RABAC1   | iFIB | 93.80%  | 60.20% | 0.46 | 3.03E-10 |
| CALU     | iFIB | 79.40%  | 36.20% | 0.41 | 4.15E-10 |
| DSTN     | iFIB | 96.90%  | 83.70% | 0.50 | 4.46E-10 |
| CTNNAL1  | iFIB | 38.10%  | 10.30% | 0.26 | 4.67E-10 |
| NUPR1    | iFIB | 92.80%  | 49.90% | 0.47 | 4.79E-10 |
| SRI      | iFIB | 71.10%  | 31.10% | 0.39 | 5.40E-10 |
| MAGED2   | iFIB | 60.80%  | 21.90% | 0.31 | 5.63E-10 |
| APP      | iFIB | 83.50%  | 39.60% | 0.47 | 8.90E-10 |
| TPM1     | iFIB | 53.60%  | 17.80% | 0.31 | 1.03E-09 |
| SLC25A36 | iFIB | 42.30%  | 12.60% | 0.26 | 1.09E-09 |
| MINOS1   | iFIB | 93.80%  | 66.10% | 0.42 | 1.12E-09 |
| KCNMA1   | iFIB | 49.50%  | 15.70% | 0.39 | 1.47E-09 |
| SEC61A1  | iFIB | 46.40%  | 14.40% | 0.25 | 1.89E-09 |
| TFG      | iFIB | 67.00%  | 27.00% | 0.31 | 2.26E-09 |
| SEPW1    | iFIB | 85.60%  | 41.40% | 0.38 | 3.12E-09 |
| RPS4Y1   | iFIB | 54.60%  | 20.90% | 0.48 | 4.10E-09 |
| RPL3     | iFIB | 100.00% | 99.70% | 0.29 | 5.25E-09 |
| MRPL32   | iFIB | 55.70%  | 20.20% | 0.28 | 7.37E-09 |
| PTGDS    | iFIB | 24.70%  | 5.30%  | 0.75 | 7.52E-09 |
| P4HB     | iFIB | 85.60%  | 48.90% | 0.41 | 7.73E-09 |
| KCNQ1OT1 | iFIB | 86.60%  | 42.70% | 0.44 | 7.84E-09 |
| RBBP6    | iFIB | 81.40%  | 39.30% | 0.40 | 8.40E-09 |
| TFPI     | iFIB | 55.70%  | 19.60% | 0.28 | 8.88E-09 |
| MPG      | iFIB | 56.70%  | 21.50% | 0.31 | 1.05E-08 |
| EEF2     | iFIB | 99.00%  | 90.10% | 0.33 | 1.08E-08 |
| CD276    | iFIB | 47.40%  | 15.90% | 0.25 | 1.26E-08 |
| PPP3CA   | iFIB | 61.90%  | 26.80% | 0.39 | 1.27E-08 |
| SERTAD1  | iFIB | 90.70%  | 54.70% | 0.45 | 1.56E-08 |
| SLPI     | iFIB | 15.50%  | 2.20%  | 0.64 | 1.61E-08 |
| SOCS3    | iFIB | 86.60%  | 50.60% | 0.50 | 2.56E-08 |
| LEPROT   | iFIB | 76.30%  | 36.10% | 0.34 | 2.80E-08 |
| GINM1    | iFIB | 59.80%  | 22.50% | 0.28 | 3.18E-08 |
| YIF1A    | iFIB | 57.70%  | 21.60% | 0.29 | 3.85E-08 |
| IRF1     | iFIB | 74.20%  | 39.00% | 0.46 | 4.24E-08 |
| ARL6IP5  | iFIB | 95.90%  | 66.80% | 0.37 | 4.56E-08 |
| EGR1     | iFIB | 91.80%  | 56.40% | 0.37 | 4.62E-08 |
| H2AFJ    | iFIB | 74.20%  | 35.50% | 0.39 | 5.55E-08 |
| EPHX1    | iFIB | 72.20%  | 31.00% | 0.34 | 6.27E-08 |

|             |      |         |        |      |          |
|-------------|------|---------|--------|------|----------|
| NUCKS1      | iFIB | 90.70%  | 58.40% | 0.42 | 7.16E-08 |
| UGP2        | iFIB | 81.40%  | 45.00% | 0.47 | 1.07E-07 |
| COP56       | iFIB | 71.10%  | 30.20% | 0.27 | 1.67E-07 |
| DYNLT1      | iFIB | 59.80%  | 23.40% | 0.25 | 2.33E-07 |
| ITM2B       | iFIB | 100.00% | 98.30% | 0.35 | 2.72E-07 |
| JUNB        | iFIB | 100.00% | 95.80% | 0.45 | 3.40E-07 |
| IL6ST       | iFIB | 66.00%  | 28.60% | 0.35 | 3.44E-07 |
| PPIB        | iFIB | 93.80%  | 71.60% | 0.40 | 3.62E-07 |
| TNFRSF12A   | iFIB | 69.10%  | 32.80% | 0.52 | 5.11E-07 |
| ARL4D       | iFIB | 55.70%  | 23.40% | 0.34 | 5.38E-07 |
| MIR4435-1HG | iFIB | 53.60%  | 20.30% | 0.28 | 5.73E-07 |
| PXDC1       | iFIB | 55.70%  | 21.30% | 0.26 | 8.95E-07 |
| H3F3B       | iFIB | 100.00% | 99.00% | 0.27 | 1.00E-06 |
| LGALS3      | iFIB | 100.00% | 90.20% | 0.35 | 1.09E-06 |
| CCND1       | iFIB | 52.60%  | 21.50% | 0.36 | 1.22E-06 |
| CD81        | iFIB | 87.60%  | 50.00% | 0.32 | 1.67E-06 |
| COL15A1     | iFIB | 14.40%  | 2.40%  | 0.35 | 1.85E-06 |
| SPTSSA      | iFIB | 67.00%  | 30.50% | 0.29 | 2.56E-06 |
| SKP1        | iFIB | 96.90%  | 75.50% | 0.34 | 2.62E-06 |
| RBBP7       | iFIB | 56.70%  | 22.80% | 0.26 | 3.05E-06 |
| SERPINF1    | iFIB | 87.60%  | 58.30% | 0.66 | 3.06E-06 |
| LMO4        | iFIB | 63.90%  | 28.70% | 0.32 | 3.52E-06 |
| CFD         | iFIB | 95.90%  | 87.30% | 0.93 | 3.60E-06 |
| SOD1        | iFIB | 94.80%  | 77.30% | 0.37 | 4.16E-06 |
| CAMLG       | iFIB | 71.10%  | 33.30% | 0.28 | 6.96E-06 |
| OST4        | iFIB | 97.90%  | 77.00% | 0.35 | 7.05E-06 |
| RPL10A      | iFIB | 100.00% | 99.10% | 0.26 | 7.65E-06 |
| CHCHD2      | iFIB | 96.90%  | 85.60% | 0.32 | 1.10E-05 |
| DAD1        | iFIB | 93.80%  | 60.30% | 0.33 | 1.17E-05 |
| APOE        | iFIB | 37.10%  | 12.70% | 0.35 | 1.25E-05 |
| RCAN1       | iFIB | 59.80%  | 26.10% | 0.29 | 1.91E-05 |
| ISCU        | iFIB | 86.60%  | 49.30% | 0.29 | 1.97E-05 |
| VIMP        | iFIB | 80.40%  | 43.50% | 0.31 | 3.32E-05 |
| SIVA1       | iFIB | 72.20%  | 34.40% | 0.25 | 3.51E-05 |
| MLF2        | iFIB | 68.00%  | 31.60% | 0.25 | 3.90E-05 |
| PSMB5       | iFIB | 68.00%  | 33.90% | 0.26 | 4.08E-05 |
| IL6         | iFIB | 52.60%  | 23.40% | 0.43 | 4.29E-05 |
| MORF4L2     | iFIB | 85.60%  | 44.10% | 0.29 | 4.42E-05 |
| MMP3        | iFIB | 27.80%  | 8.50%  | 0.52 | 4.49E-05 |
| ATRAID      | iFIB | 83.50%  | 49.30% | 0.30 | 4.61E-05 |
| MRPL51      | iFIB | 81.40%  | 44.40% | 0.27 | 4.62E-05 |



|         |      |        |        |      |          |
|---------|------|--------|--------|------|----------|
| GUK1    | iFIB | 92.80% | 71.40% | 0.35 | 4.99E-05 |
| ELL2    | iFIB | 64.90% | 30.50% | 0.28 | 5.73E-05 |
| SSR2    | iFIB | 86.60% | 53.90% | 0.29 | 6.63E-05 |
| GOLGA4  | iFIB | 87.60% | 46.30% | 0.29 | 9.48E-05 |
| HCFC1R1 | iFIB | 63.90% | 31.30% | 0.29 | 1.04E-04 |
| CREB5   | iFIB | 54.60% | 24.90% | 0.28 | 1.30E-04 |
| CRIP2   | iFIB | 75.30% | 44.20% | 0.36 | 1.66E-04 |
| HDLBP   | iFIB | 73.20% | 38.90% | 0.29 | 1.83E-04 |
| HNRNPA0 | iFIB | 94.80% | 59.90% | 0.29 | 1.95E-04 |
| AKAP9   | iFIB | 83.50% | 43.60% | 0.26 | 2.06E-04 |
| BSG     | iFIB | 88.70% | 58.30% | 0.32 | 2.43E-04 |
| CYSTM1  | iFIB | 77.30% | 41.30% | 0.28 | 3.19E-04 |
| C4orf3  | iFIB | 88.70% | 55.00% | 0.33 | 3.29E-04 |
| PEBP1   | iFIB | 91.80% | 63.90% | 0.29 | 3.85E-04 |
| TPI1    | iFIB | 97.90% | 81.90% | 0.29 | 4.39E-04 |
| TUBB2A  | iFIB | 77.30% | 44.80% | 0.27 | 4.79E-04 |
| ERGIC3  | iFIB | 78.40% | 44.50% | 0.26 | 5.11E-04 |
| EMC4    | iFIB | 56.70% | 27.20% | 0.26 | 6.03E-04 |
| TMEM258 | iFIB | 92.80% | 68.40% | 0.26 | 6.90E-04 |
| ITGB1   | iFIB | 88.70% | 61.30% | 0.31 | 8.26E-04 |
| LRPAP1  | iFIB | 72.20% | 41.70% | 0.27 | 8.76E-04 |
| PIGT    | iFIB | 54.60% | 26.50% | 0.29 | 1.40E-03 |
| EMC7    | iFIB | 63.90% | 33.20% | 0.25 | 1.57E-03 |
| RAB2A   | iFIB | 80.40% | 48.50% | 0.25 | 1.96E-03 |
| OSTC    | iFIB | 72.20% | 40.80% | 0.27 | 2.09E-03 |
| GOLIM4  | iFIB | 72.20% | 38.10% | 0.31 | 2.12E-03 |
| MGST3   | iFIB | 89.70% | 74.00% | 0.29 | 2.17E-03 |
| NDFIP1  | iFIB | 88.70% | 58.20% | 0.30 | 2.69E-03 |
| KDELR1  | iFIB | 75.30% | 41.90% | 0.26 | 2.79E-03 |
| YWHAQ   | iFIB | 84.50% | 54.90% | 0.30 | 3.83E-03 |
| IFITM2  | iFIB | 92.80% | 65.60% | 0.33 | 5.16E-03 |
| MAT2A   | iFIB | 76.30% | 45.10% | 0.29 | 5.46E-03 |
| RAN     | iFIB | 90.70% | 64.90% | 0.26 | 8.93E-03 |
| DYNLL1  | iFIB | 99.00% | 87.70% | 0.25 | 9.98E-03 |
| SEC61G  | iFIB | 95.90% | 69.20% | 0.28 | 1.61E-02 |
| TMED9   | iFIB | 85.60% | 54.60% | 0.26 | 1.87E-02 |
| SHFM1   | iFIB | 92.80% | 65.00% | 0.25 | 1.87E-02 |
| 7-Sep   | iFIB | 86.60% | 54.10% | 0.25 | 2.03E-02 |
| GPX4    | iFIB | 96.90% | 87.60% | 0.26 | 2.14E-02 |
| PPDPF   | iFIB | 93.80% | 73.70% | 0.29 | 2.70E-02 |
| JTB     | iFIB | 81.40% | 56.60% | 0.27 | 3.11E-02 |

|              |        |         |        |      |           |
|--------------|--------|---------|--------|------|-----------|
| ALDOA        | iFIB   | 99.00%  | 87.30% | 0.26 | 4.34E-02  |
| APOC1        | iFIB   | 25.80%  | 10.30% | 0.49 | 3.19E-01  |
| RPS26        | iFIB   | 99.00%  | 84.10% | 0.31 | 1.00E+00  |
| PLP2         | iFIB   | 74.20%  | 55.20% | 0.28 | 1.00E+00  |
| MZB1         | B cell | 100.00% | 0.50%  | 4.09 | 3.83E-191 |
| TNFRSF17     | B cell | 69.20%  | 0.10%  | 0.86 | 8.22E-182 |
| RP11-16E12.2 | B cell | 61.50%  | 0.00%  | 1.09 | 2.18E-179 |
| POU2AF1      | B cell | 61.50%  | 0.00%  | 0.72 | 2.18E-179 |
| CD79A        | B cell | 100.00% | 0.70%  | 2.61 | 9.67E-174 |
| FCRL5        | B cell | 69.20%  | 0.10%  | 1.04 | 1.19E-164 |
| SPAG4        | B cell | 84.60%  | 0.40%  | 1.68 | 2.43E-159 |
| ZBTB32       | B cell | 53.80%  | 0.00%  | 0.96 | 1.47E-156 |
| DERL3        | B cell | 100.00% | 0.90%  | 3.37 | 7.43E-153 |
| SMPDL3B      | B cell | 61.50%  | 0.10%  | 0.69 | 1.27E-142 |
| FAM92B       | B cell | 53.80%  | 0.10%  | 0.83 | 1.44E-136 |
| CD27         | B cell | 76.90%  | 0.50%  | 1.44 | 7.40E-131 |
| IGJ          | B cell | 84.60%  | 0.70%  | 4.56 | 6.69E-129 |
| CPNE5        | B cell | 46.20%  | 0.10%  | 0.48 | 3.83E-114 |
| RP11-685N3.1 | B cell | 38.50%  | 0.00%  | 0.72 | 5.48E-111 |
| APOBEC3B     | B cell | 61.50%  | 0.40%  | 0.89 | 9.73E-101 |
| RP11-290F5.1 | B cell | 53.80%  | 0.30%  | 0.70 | 8.60E-98  |
| C4orf26      | B cell | 38.50%  | 0.10%  | 0.71 | 1.03E-91  |
| AC104699.1   | B cell | 38.50%  | 0.10%  | 0.28 | 1.03E-91  |
| AIM2         | B cell | 53.80%  | 0.40%  | 0.53 | 1.37E-89  |
| TAS1R3       | B cell | 30.80%  | 0.00%  | 0.39 | 3.07E-88  |
| RASSF6       | B cell | 38.50%  | 0.10%  | 0.43 | 4.87E-78  |
| RP11-81H14.2 | B cell | 38.50%  | 0.10%  | 0.32 | 6.07E-78  |
| SDC1         | B cell | 53.80%  | 0.50%  | 0.62 | 3.17E-76  |
| ZBP1         | B cell | 53.80%  | 0.50%  | 0.60 | 4.32E-76  |
| ESR2         | B cell | 30.80%  | 0.10%  | 0.49 | 8.26E-70  |
| GNB3         | B cell | 30.80%  | 0.10%  | 0.42 | 9.35E-70  |
| C2orf88      | B cell | 38.50%  | 0.20%  | 0.38 | 6.64E-68  |
| CTB-43E15.4  | B cell | 23.10%  | 0.00%  | 0.48 | 1.64E-65  |
| KB-1980E6.3  | B cell | 23.10%  | 0.00%  | 0.37 | 1.64E-65  |
| CD38         | B cell | 76.90%  | 1.80%  | 0.87 | 1.77E-63  |
| PTP4A3       | B cell | 53.80%  | 0.80%  | 1.47 | 1.17E-58  |
| IGLL5        | B cell | 100.00% | 4.20%  | 4.94 | 1.07E-54  |
| RALGPS2      | B cell | 61.50%  | 1.30%  | 0.53 | 6.07E-54  |
| ZNF215       | B cell | 38.50%  | 0.40%  | 0.35 | 2.63E-53  |
| LMTK3        | B cell | 30.80%  | 0.20%  | 0.44 | 7.64E-49  |
| IGLL1        | B cell | 30.80%  | 0.20%  | 0.29 | 1.69E-48  |

|                |        |         |        |      |          |
|----------------|--------|---------|--------|------|----------|
| E2F5           | B cell | 23.10%  | 0.10%  | 0.25 | 2.71E-48 |
| KIAA0125       | B cell | 23.10%  | 0.10%  | 0.31 | 3.83E-48 |
| RP11-446N19.1  | B cell | 38.50%  | 0.40%  | 0.40 | 4.69E-48 |
| HLA-DOB        | B cell | 61.50%  | 1.60%  | 0.91 | 3.11E-45 |
| PTPRCAP        | B cell | 69.20%  | 2.10%  | 0.96 | 1.11E-44 |
| RP11-94L15.2   | B cell | 38.50%  | 0.50%  | 0.48 | 1.05E-43 |
| HBD            | B cell | 15.40%  | 0.00%  | 0.51 | 8.62E-43 |
| SMIM22         | B cell | 15.40%  | 0.00%  | 0.25 | 8.62E-43 |
| CD79B          | B cell | 46.20%  | 0.90%  | 0.57 | 1.09E-41 |
| FKBP11         | B cell | 100.00% | 6.10%  | 2.58 | 3.44E-40 |
| PAIP2B         | B cell | 38.50%  | 0.60%  | 0.40 | 5.34E-40 |
| ZNF165         | B cell | 53.80%  | 1.40%  | 0.84 | 3.89E-39 |
| SERPIN1        | B cell | 53.80%  | 1.50%  | 0.83 | 7.57E-38 |
| JSRP1          | B cell | 30.80%  | 0.40%  | 0.55 | 6.48E-37 |
| MCTP2          | B cell | 30.80%  | 0.40%  | 0.29 | 6.94E-37 |
| GZMB           | B cell | 38.50%  | 0.70%  | 0.59 | 8.99E-37 |
| RAB30          | B cell | 61.50%  | 2.40%  | 1.26 | 9.49E-33 |
| TSPAN13        | B cell | 53.80%  | 1.70%  | 0.52 | 9.92E-33 |
| BIK            | B cell | 61.50%  | 2.40%  | 0.80 | 2.19E-32 |
| HIST1H1C       | B cell | 84.60%  | 4.80%  | 1.22 | 2.40E-32 |
| RP11-1070N10.3 | B cell | 38.50%  | 0.80%  | 0.87 | 4.13E-32 |
| PYCR1          | B cell | 53.80%  | 1.80%  | 0.59 | 4.57E-32 |
| PNOC           | B cell | 23.10%  | 0.20%  | 0.30 | 5.53E-31 |
| CLDN14         | B cell | 23.10%  | 0.20%  | 0.27 | 7.53E-31 |
| GNG7           | B cell | 76.90%  | 4.20%  | 0.85 | 1.12E-29 |
| HIST1H2AE      | B cell | 30.80%  | 0.50%  | 0.91 | 1.56E-29 |
| GPR160         | B cell | 53.80%  | 2.10%  | 0.42 | 3.96E-27 |
| BRSK1          | B cell | 46.20%  | 1.50%  | 0.51 | 4.83E-27 |
| QPRT           | B cell | 69.20%  | 3.70%  | 0.83 | 7.09E-27 |
| RHOH           | B cell | 76.90%  | 5.30%  | 1.24 | 1.17E-24 |
| TEX9           | B cell | 30.80%  | 0.70%  | 0.43 | 1.85E-24 |
| ICAM3          | B cell | 92.30%  | 7.80%  | 1.09 | 2.09E-24 |
| RP11-532F12.5  | B cell | 30.80%  | 0.70%  | 0.26 | 2.35E-24 |
| ITM2C          | B cell | 100.00% | 10.20% | 1.83 | 2.82E-24 |
| SYNE2          | B cell | 53.80%  | 2.40%  | 0.93 | 1.59E-23 |
| TMEM156        | B cell | 38.50%  | 1.20%  | 0.53 | 3.35E-23 |
| AQP3           | B cell | 61.50%  | 3.40%  | 0.81 | 1.71E-22 |
| SYTL1          | B cell | 38.50%  | 1.30%  | 0.45 | 3.29E-22 |
| OCIAD2         | B cell | 61.50%  | 3.40%  | 0.48 | 4.63E-22 |
| PERP           | B cell | 53.80%  | 2.70%  | 0.55 | 3.11E-21 |

|              |        |         |        |      |          |
|--------------|--------|---------|--------|------|----------|
| CTH          | B cell | 38.50%  | 1.30%  | 0.50 | 4.82E-21 |
| CHKB-AS1     | B cell | 30.80%  | 0.80%  | 0.27 | 1.68E-20 |
| ATAD3C       | B cell | 38.50%  | 1.40%  | 0.34 | 1.67E-19 |
| AC074289.1   | B cell | 61.50%  | 3.80%  | 0.53 | 2.69E-19 |
| MEI1         | B cell | 53.80%  | 3.00%  | 0.45 | 2.79E-19 |
| HIST1H2BJ    | B cell | 38.50%  | 1.50%  | 0.75 | 4.41E-19 |
| KCNN3        | B cell | 30.80%  | 0.90%  | 0.39 | 5.41E-19 |
| HIST2H2BE    | B cell | 53.80%  | 3.10%  | 0.89 | 2.24E-18 |
| SYNGR1       | B cell | 46.20%  | 2.20%  | 0.33 | 2.38E-18 |
| DNAAF1       | B cell | 38.50%  | 1.60%  | 1.81 | 3.02E-18 |
| LY9          | B cell | 38.50%  | 1.60%  | 0.93 | 9.48E-18 |
| AC017002.1   | B cell | 23.10%  | 0.50%  | 0.50 | 3.72E-17 |
| RP1-31316.12 | B cell | 84.60%  | 9.50%  | 1.27 | 1.08E-16 |
| SLC38A5      | B cell | 30.80%  | 1.00%  | 0.33 | 1.31E-16 |
| CERCAM       | B cell | 69.20%  | 6.10%  | 0.75 | 5.40E-16 |
| CHPF         | B cell | 61.50%  | 4.80%  | 0.60 | 2.07E-15 |
| TOR3A        | B cell | 92.30%  | 12.70% | 1.10 | 2.64E-14 |
| PIM2         | B cell | 84.60%  | 11.30% | 1.52 | 2.97E-14 |
| COBLL1       | B cell | 38.50%  | 2.00%  | 0.40 | 1.08E-13 |
| TPD52        | B cell | 53.80%  | 3.90%  | 0.48 | 1.37E-13 |
| ASNS         | B cell | 53.80%  | 4.30%  | 0.65 | 6.80E-13 |
| PPAPDC1B     | B cell | 76.90%  | 9.50%  | 1.06 | 1.59E-12 |
| HSH2D        | B cell | 23.10%  | 0.70%  | 0.26 | 3.79E-12 |
| SLC38A1      | B cell | 61.50%  | 5.60%  | 0.47 | 4.84E-12 |
| HIST1H2BK    | B cell | 92.30%  | 15.20% | 1.20 | 1.18E-11 |
| B4GALT7      | B cell | 76.90%  | 8.90%  | 0.55 | 1.28E-11 |
| GLCCI1       | B cell | 46.20%  | 3.40%  | 0.44 | 3.14E-11 |
| C3orf52      | B cell | 23.10%  | 0.80%  | 0.28 | 3.67E-11 |
| IL2RG        | B cell | 69.20%  | 7.80%  | 0.57 | 4.27E-11 |
| ERLEC1       | B cell | 100.00% | 22.60% | 1.45 | 6.89E-11 |
| PRDX4        | B cell | 100.00% | 24.80% | 1.80 | 7.74E-11 |
| ORMDL3       | B cell | 61.50%  | 6.10%  | 0.40 | 1.72E-10 |
| ISG20        | B cell | 100.00% | 22.20% | 1.78 | 2.67E-10 |
| SEC11C       | B cell | 100.00% | 27.20% | 2.11 | 3.00E-10 |
| ST6GALNAC4   | B cell | 69.20%  | 8.70%  | 0.74 | 4.34E-10 |
| RAB39B       | B cell | 23.10%  | 0.90%  | 0.26 | 5.00E-10 |
| RNF122       | B cell | 30.80%  | 1.60%  | 0.35 | 6.27E-10 |
| FAM46C       | B cell | 76.90%  | 11.20% | 1.09 | 9.47E-10 |
| YIPF2        | B cell | 61.50%  | 6.60%  | 0.50 | 1.01E-09 |
| CTHRC1       | B cell | 38.50%  | 2.70%  | 0.52 | 1.53E-09 |
| TAPBPL       | B cell | 69.20%  | 8.70%  | 0.74 | 1.57E-09 |

|            |        |         |        |      |          |
|------------|--------|---------|--------|------|----------|
| BLNK       | B cell | 76.90%  | 11.00% | 0.77 | 2.63E-09 |
| SRPRB      | B cell | 84.60%  | 14.70% | 0.92 | 3.63E-09 |
| LMF1       | B cell | 46.20%  | 4.00%  | 0.38 | 4.80E-09 |
| TOR2A      | B cell | 38.50%  | 2.80%  | 0.35 | 6.36E-09 |
| WDYHV1     | B cell | 38.50%  | 2.90%  | 0.39 | 7.93E-09 |
| TUBA4A     | B cell | 76.90%  | 11.60% | 0.94 | 8.34E-09 |
| SDF2L1     | B cell | 100.00% | 27.20% | 1.46 | 1.36E-08 |
| MGAT2      | B cell | 84.60%  | 14.40% | 0.68 | 1.47E-08 |
| TNFRSF18   | B cell | 46.20%  | 4.30%  | 0.64 | 1.64E-08 |
| HMCES      | B cell | 69.20%  | 9.50%  | 0.66 | 1.89E-08 |
| KLF13      | B cell | 84.60%  | 15.40% | 0.91 | 1.95E-08 |
| GLTPD1     | B cell | 38.50%  | 3.00%  | 0.26 | 3.89E-08 |
| LMAN1      | B cell | 100.00% | 27.30% | 1.03 | 4.74E-08 |
| MDK        | B cell | 38.50%  | 3.10%  | 0.46 | 5.48E-08 |
| MTERFD2    | B cell | 61.50%  | 7.30%  | 0.36 | 7.58E-08 |
| DHRS9      | B cell | 53.80%  | 6.20%  | 0.95 | 9.78E-08 |
| CAPN10-AS1 | B cell | 30.80%  | 2.00%  | 0.39 | 9.79E-08 |
| TRABD      | B cell | 84.60%  | 15.50% | 0.67 | 3.55E-07 |
| CXXC5      | B cell | 69.20%  | 10.50% | 0.61 | 4.52E-07 |
| LRWD1      | B cell | 38.50%  | 3.30%  | 0.32 | 5.88E-07 |
| JMJD4      | B cell | 30.80%  | 2.10%  | 0.29 | 6.42E-07 |
| CADM1      | B cell | 46.20%  | 4.80%  | 0.38 | 6.64E-07 |
| NUCB2      | B cell | 84.60%  | 19.40% | 1.23 | 7.29E-07 |
| ISOC1      | B cell | 61.50%  | 8.40%  | 0.55 | 7.74E-07 |
| HIST1H2BC  | B cell | 15.40%  | 0.50%  | 0.26 | 8.49E-07 |
| STAP1      | B cell | 15.40%  | 0.50%  | 0.57 | 9.40E-07 |
| TIFA       | B cell | 69.20%  | 11.40% | 0.74 | 1.03E-06 |
| EDEM2      | B cell | 69.20%  | 11.00% | 0.63 | 1.04E-06 |
| P2RX1      | B cell | 23.10%  | 1.30%  | 0.33 | 1.08E-06 |
| CHAC1      | B cell | 46.20%  | 5.10%  | 0.70 | 1.30E-06 |
| SPATS2     | B cell | 61.50%  | 9.00%  | 0.62 | 1.75E-06 |
| NUDT22     | B cell | 69.20%  | 10.60% | 0.44 | 2.69E-06 |
| ABHD5      | B cell | 84.60%  | 18.60% | 1.42 | 2.93E-06 |
| PARM1      | B cell | 23.10%  | 1.30%  | 0.35 | 4.12E-06 |
| PYCRL      | B cell | 23.10%  | 1.30%  | 0.27 | 4.49E-06 |
| PPP1CC     | B cell | 92.30%  | 21.00% | 0.71 | 5.08E-06 |
| XBP1       | B cell | 100.00% | 51.50% | 2.19 | 6.74E-06 |
| SSR3       | B cell | 100.00% | 49.70% | 1.34 | 6.95E-06 |
| SYTL3      | B cell | 61.50%  | 9.00%  | 0.43 | 7.22E-06 |
| SSR4       | B cell | 100.00% | 73.30% | 3.21 | 7.63E-06 |
| RNF34      | B cell | 53.80%  | 6.70%  | 0.28 | 8.04E-06 |

|           |        |         |        |      |          |
|-----------|--------|---------|--------|------|----------|
| SMOX      | B cell | 53.80%  | 7.40%  | 0.80 | 8.69E-06 |
| NPPC      | B cell | 15.40%  | 0.60%  | 0.50 | 9.80E-06 |
| LINC-PINT | B cell | 84.60%  | 17.20% | 0.56 | 1.06E-05 |
| FKBP2     | B cell | 100.00% | 56.30% | 1.65 | 1.07E-05 |
| LINC00152 | B cell | 100.00% | 36.80% | 1.97 | 1.17E-05 |
| HLA-C     | B cell | 100.00% | 97.00% | 2.17 | 1.19E-05 |
| CAV1      | B cell | 76.90%  | 14.70% | 0.77 | 1.33E-05 |
| LINC00649 | B cell | 30.80%  | 2.50%  | 0.50 | 1.40E-05 |
| SYVN1     | B cell | 53.80%  | 7.40%  | 0.43 | 1.69E-05 |
| CHST2     | B cell | 38.50%  | 3.90%  | 0.48 | 2.02E-05 |
| ANKRD37   | B cell | 76.90%  | 17.60% | 1.38 | 2.28E-05 |
| GADD45A   | B cell | 92.30%  | 31.50% | 1.61 | 2.37E-05 |
| SCYL1     | B cell | 69.20%  | 12.70% | 0.65 | 2.57E-05 |
| APOBEC3A  | B cell | 23.10%  | 1.50%  | 0.54 | 2.63E-05 |
| GGH       | B cell | 53.80%  | 7.50%  | 0.41 | 2.72E-05 |
| DNAJB9    | B cell | 92.30%  | 31.30% | 1.32 | 2.75E-05 |
| SLC1A4    | B cell | 46.20%  | 5.60%  | 0.38 | 3.59E-05 |
| SELM      | B cell | 100.00% | 41.10% | 1.09 | 4.37E-05 |
| ZEB1      | B cell | 46.20%  | 5.60%  | 0.25 | 4.55E-05 |
| SPCS3     | B cell | 100.00% | 33.20% | 1.19 | 4.82E-05 |
| KLHL6     | B cell | 46.20%  | 5.70%  | 0.43 | 5.00E-05 |
| HLA-B     | B cell | 100.00% | 99.20% | 1.20 | 6.05E-05 |
| TXNDC15   | B cell | 76.90%  | 17.90% | 0.98 | 6.07E-05 |
| ICAM2     | B cell | 46.20%  | 5.90%  | 0.49 | 6.95E-05 |
| IFNAR2    | B cell | 69.20%  | 12.70% | 0.51 | 7.27E-05 |
| SPP1      | B cell | 69.20%  | 12.40% | 1.27 | 7.42E-05 |
| HERPUD1   | B cell | 100.00% | 71.20% | 2.37 | 8.53E-05 |
| DERL1     | B cell | 84.60%  | 22.30% | 0.81 | 9.47E-05 |
| RRBP1     | B cell | 100.00% | 42.40% | 1.19 | 1.24E-04 |
| OGFOD3    | B cell | 53.80%  | 8.70%  | 0.66 | 1.32E-04 |
| NME1      | B cell | 84.60%  | 23.30% | 0.93 | 1.42E-04 |
| SLC38A10  | B cell | 69.20%  | 14.40% | 0.65 | 1.46E-04 |
| HIPK2     | B cell | 53.80%  | 8.20%  | 0.42 | 1.54E-04 |
| SSTR2     | B cell | 23.10%  | 1.60%  | 0.37 | 1.84E-04 |
| PTPN7     | B cell | 38.50%  | 4.40%  | 0.43 | 2.03E-04 |
| ZNF593    | B cell | 76.90%  | 16.20% | 0.52 | 2.17E-04 |
| SERP1     | B cell | 100.00% | 73.60% | 1.14 | 2.24E-04 |
| CDC37L1   | B cell | 53.80%  | 8.50%  | 0.77 | 2.51E-04 |
| ARID5B    | B cell | 100.00% | 35.50% | 1.26 | 2.74E-04 |
| EFCAB4A   | B cell | 38.50%  | 4.40%  | 0.27 | 3.02E-04 |
| YIF1A     | B cell | 92.30%  | 23.50% | 0.64 | 3.05E-04 |

|          |        |         |        |      |          |
|----------|--------|---------|--------|------|----------|
| APOBEC3F | B cell | 23.10%  | 1.70%  | 0.39 | 3.44E-04 |
| PSAT1    | B cell | 15.40%  | 0.70%  | 0.28 | 3.60E-04 |
| HSD17B8  | B cell | 46.20%  | 6.30%  | 0.38 | 3.83E-04 |
| HIST1H4H | B cell | 23.10%  | 1.70%  | 0.32 | 4.02E-04 |
| TMEM59   | B cell | 100.00% | 69.90% | 1.24 | 4.18E-04 |
| SEC24A   | B cell | 69.20%  | 13.50% | 0.62 | 4.62E-04 |
| DHDDS    | B cell | 46.20%  | 6.10%  | 0.28 | 4.75E-04 |
| RABAC1   | B cell | 100.00% | 62.30% | 1.20 | 6.07E-04 |
| NT5C3A   | B cell | 61.50%  | 11.00% | 0.39 | 7.52E-04 |
| GAMT     | B cell | 46.20%  | 6.50%  | 0.32 | 7.65E-04 |
| UBE2J1   | B cell | 69.20%  | 16.10% | 0.79 | 1.10E-03 |
| PIGP     | B cell | 76.90%  | 17.80% | 0.49 | 1.30E-03 |
| FNDC3A   | B cell | 84.60%  | 22.30% | 0.73 | 1.38E-03 |
| TMEM208  | B cell | 92.30%  | 28.20% | 0.73 | 1.42E-03 |
| CDKN1B   | B cell | 61.50%  | 11.90% | 0.54 | 1.51E-03 |
| SPCS1    | B cell | 100.00% | 50.40% | 1.10 | 1.53E-03 |
| SPCS2    | B cell | 100.00% | 56.30% | 1.16 | 2.34E-03 |
| ANKRD39  | B cell | 38.50%  | 5.00%  | 0.33 | 2.43E-03 |
| SEL1L    | B cell | 69.20%  | 16.10% | 0.73 | 3.44E-03 |
| ISCA1    | B cell | 76.90%  | 20.50% | 0.67 | 3.81E-03 |
| PHGDH    | B cell | 23.10%  | 2.00%  | 0.29 | 3.94E-03 |
| FAM136A  | B cell | 53.80%  | 9.50%  | 0.42 | 4.04E-03 |
| RPLP0    | B cell | 100.00% | 96.70% | 1.17 | 4.10E-03 |
| TM7SF2   | B cell | 23.10%  | 2.00%  | 0.29 | 4.72E-03 |
| LARP1B   | B cell | 53.80%  | 9.50%  | 0.36 | 4.78E-03 |
| STXBP6   | B cell | 23.10%  | 2.00%  | 0.40 | 4.86E-03 |
| CDR1     | B cell | 23.10%  | 2.00%  | 0.26 | 4.86E-03 |
| PPP3CC   | B cell | 53.80%  | 9.30%  | 0.48 | 5.25E-03 |
| RPS26    | B cell | 100.00% | 85.00% | 1.17 | 5.56E-03 |
| MANF     | B cell | 84.60%  | 32.10% | 1.17 | 6.16E-03 |
| SLAMF7   | B cell | 38.50%  | 5.60%  | 0.53 | 6.32E-03 |
| CLEC2D   | B cell | 30.80%  | 3.60%  | 0.37 | 7.14E-03 |
| CKAP4    | B cell | 46.20%  | 7.50%  | 0.32 | 7.32E-03 |
| CYTIP    | B cell | 92.30%  | 39.20% | 1.03 | 9.35E-03 |
| TMEM214  | B cell | 46.20%  | 7.50%  | 0.33 | 1.05E-02 |
| SIL1     | B cell | 69.20%  | 17.70% | 0.89 | 1.06E-02 |
| GNL3     | B cell | 76.90%  | 22.90% | 0.76 | 1.14E-02 |
| MRPS31   | B cell | 46.20%  | 8.40%  | 0.72 | 1.29E-02 |
| RPL3     | B cell | 100.00% | 99.70% | 1.19 | 1.35E-02 |
| UBALD2   | B cell | 76.90%  | 19.80% | 0.72 | 1.40E-02 |
| TMEM258  | B cell | 100.00% | 69.80% | 1.00 | 1.55E-02 |

|          |        |         |         |      |          |
|----------|--------|---------|---------|------|----------|
| GFPT1    | B cell | 53.80%  | 10.30%  | 0.43 | 1.73E-02 |
| SELK     | B cell | 100.00% | 69.20%  | 1.14 | 1.76E-02 |
| ERGIC2   | B cell | 69.20%  | 18.30%  | 0.71 | 1.90E-02 |
| ABHD14A  | B cell | 53.80%  | 10.30%  | 0.46 | 2.06E-02 |
| CHID1    | B cell | 92.30%  | 28.60%  | 0.65 | 2.13E-02 |
| ARID5A   | B cell | 84.60%  | 31.90%  | 0.69 | 2.24E-02 |
| ARF4     | B cell | 100.00% | 50.20%  | 0.83 | 2.28E-02 |
| ALG5     | B cell | 76.90%  | 21.80%  | 0.65 | 2.36E-02 |
| YKT6     | B cell | 61.50%  | 12.90%  | 0.40 | 2.44E-02 |
| NEDD4L   | B cell | 38.50%  | 6.30%   | 0.72 | 2.62E-02 |
| TMED4    | B cell | 84.60%  | 27.10%  | 0.71 | 2.64E-02 |
| PNKP     | B cell | 61.50%  | 13.50%  | 0.40 | 2.94E-02 |
| ANKRD44  | B cell | 46.20%  | 7.80%   | 0.27 | 3.17E-02 |
| RPLP1    | B cell | 100.00% | 100.00% | 0.92 | 3.38E-02 |
| RPL7A    | B cell | 100.00% | 99.00%  | 1.02 | 3.45E-02 |
| MRPL3    | B cell | 69.20%  | 16.70%  | 0.44 | 3.49E-02 |
| NRROS    | B cell | 53.80%  | 10.30%  | 0.36 | 3.53E-02 |
| DESI1    | B cell | 53.80%  | 10.40%  | 0.28 | 4.26E-02 |
| DDOST    | B cell | 84.60%  | 27.80%  | 0.69 | 4.28E-02 |
| SENP2    | B cell | 38.50%  | 5.90%   | 0.33 | 4.36E-02 |
| OST4     | B cell | 100.00% | 78.30%  | 0.88 | 4.47E-02 |
| PPA1     | B cell | 76.90%  | 22.50%  | 0.64 | 4.74E-02 |
| LMAN2    | B cell | 100.00% | 39.60%  | 0.90 | 5.28E-02 |
| C16orf54 | B cell | 30.80%  | 4.10%   | 0.34 | 5.34E-02 |
| PRDM1    | B cell | 84.60%  | 27.00%  | 1.10 | 5.74E-02 |
| EEF2     | B cell | 100.00% | 90.60%  | 0.87 | 6.06E-02 |
| HN1      | B cell | 84.60%  | 24.50%  | 0.49 | 6.12E-02 |
| UBQLN2   | B cell | 46.20%  | 8.10%   | 0.27 | 6.39E-02 |
| EXOSC1   | B cell | 46.20%  | 8.40%   | 0.30 | 6.48E-02 |
| TMEM134  | B cell | 69.20%  | 17.90%  | 0.57 | 6.49E-02 |
| SSR2     | B cell | 100.00% | 55.80%  | 0.91 | 6.66E-02 |
| CUTA     | B cell | 92.30%  | 55.70%  | 0.94 | 7.23E-02 |
| IARS     | B cell | 53.80%  | 11.30%  | 0.34 | 7.76E-02 |
| KDELRL1  | B cell | 100.00% | 43.70%  | 0.66 | 8.33E-02 |
| ATF4     | B cell | 100.00% | 85.30%  | 0.87 | 8.74E-02 |
| TAPSAR1  | B cell | 46.20%  | 8.70%   | 0.34 | 9.60E-02 |
| UFM1     | B cell | 92.30%  | 37.50%  | 0.84 | 1.00E-01 |
| VIMP     | B cell | 84.60%  | 45.70%  | 0.90 | 1.08E-01 |
| CLU      | B cell | 100.00% | 69.60%  | 0.62 | 1.12E-01 |
| PRELP    | B cell | 84.60%  | 27.20%  | 0.43 | 1.13E-01 |
| CTNNA1   | B cell | 53.80%  | 11.90%  | 0.44 | 1.25E-01 |



|          |        |         |        |      |          |
|----------|--------|---------|--------|------|----------|
| RPN2     | B cell | 92.30%  | 41.70% | 0.79 | 1.28E-01 |
| LRRCS9   | B cell | 84.60%  | 28.50% | 0.49 | 1.30E-01 |
| SEC61B   | B cell | 92.30%  | 73.10% | 1.10 | 1.35E-01 |
| BCAR3    | B cell | 46.20%  | 9.50%  | 0.54 | 1.42E-01 |
| P2RY10   | B cell | 15.40%  | 1.20%  | 0.28 | 1.49E-01 |
| MRPL17   | B cell | 69.20%  | 17.60% | 0.37 | 1.54E-01 |
| CREB3    | B cell | 69.20%  | 18.50% | 0.41 | 1.58E-01 |
| SEC61A1  | B cell | 61.50%  | 16.20% | 0.50 | 1.68E-01 |
| ERGIC3   | B cell | 92.30%  | 46.50% | 0.87 | 1.74E-01 |
| CNPY2    | B cell | 84.60%  | 30.00% | 0.64 | 1.79E-01 |
| VKORC1   | B cell | 92.30%  | 38.80% | 0.76 | 1.97E-01 |
| SURF1    | B cell | 92.30%  | 29.60% | 0.47 | 2.17E-01 |
| RPS6KB2  | B cell | 61.50%  | 15.40% | 0.39 | 2.19E-01 |
| EEF1D    | B cell | 100.00% | 94.80% | 0.82 | 2.28E-01 |
| ST6GAL1  | B cell | 53.80%  | 12.90% | 0.52 | 2.30E-01 |
| RPL36AL  | B cell | 100.00% | 93.30% | 0.73 | 2.40E-01 |
| NDUFA4L2 | B cell | 76.90%  | 21.10% | 0.29 | 2.48E-01 |
| C19orf10 | B cell | 84.60%  | 45.40% | 1.19 | 2.53E-01 |
| TRIM27   | B cell | 46.20%  | 9.10%  | 0.29 | 2.57E-01 |
| KRTCAP2  | B cell | 92.30%  | 42.00% | 0.73 | 2.71E-01 |
| APOBEC3C | B cell | 69.20%  | 18.90% | 0.42 | 2.77E-01 |
| ARSA     | B cell | 46.20%  | 9.30%  | 0.35 | 2.79E-01 |
| HAGH     | B cell | 69.20%  | 19.80% | 0.48 | 3.13E-01 |
| SRPR     | B cell | 61.50%  | 18.50% | 0.63 | 3.31E-01 |
| CALCOCO1 | B cell | 46.20%  | 9.20%  | 0.26 | 3.43E-01 |
| METTL1   | B cell | 30.80%  | 4.70%  | 0.28 | 3.54E-01 |
| RPS4X    | B cell | 100.00% | 99.60% | 0.85 | 3.60E-01 |
| ARFGAP1  | B cell | 38.50%  | 6.80%  | 0.25 | 3.74E-01 |
| NCLN     | B cell | 38.50%  | 7.30%  | 0.44 | 3.78E-01 |
| NUS1     | B cell | 61.50%  | 14.80% | 0.38 | 4.36E-01 |
| EEF1B2   | B cell | 100.00% | 93.90% | 0.81 | 4.39E-01 |
| RPS19BP1 | B cell | 92.30%  | 38.00% | 0.68 | 4.46E-01 |
| TTPAL    | B cell | 23.10%  | 2.90%  | 0.42 | 4.63E-01 |
| IFI27L1  | B cell | 38.50%  | 7.40%  | 0.39 | 4.98E-01 |
| MTUS1    | B cell | 30.80%  | 4.90%  | 0.30 | 4.99E-01 |
| NDUFB11  | B cell | 100.00% | 64.90% | 0.71 | 5.08E-01 |
| HTRA2    | B cell | 46.20%  | 10.70% | 0.48 | 5.22E-01 |
| SLC25A6  | B cell | 100.00% | 89.40% | 1.07 | 5.38E-01 |
| SAMSN1   | B cell | 76.90%  | 22.90% | 0.42 | 5.48E-01 |
| CCNC     | B cell | 61.50%  | 15.80% | 0.34 | 5.49E-01 |
| IGF1     | B cell | 61.50%  | 18.40% | 0.68 | 5.52E-01 |

|              |        |         |        |      |          |
|--------------|--------|---------|--------|------|----------|
| WDR45        | B cell | 61.50%  | 19.40% | 0.70 | 5.64E-01 |
| UBALD1       | B cell | 46.20%  | 9.50%  | 0.28 | 5.75E-01 |
| PGM3         | B cell | 38.50%  | 7.80%  | 0.47 | 5.75E-01 |
| ANKRD28      | B cell | 92.30%  | 51.40% | 0.95 | 5.78E-01 |
| PRDX2        | B cell | 84.60%  | 29.00% | 0.55 | 5.82E-01 |
| FBXW7        | B cell | 46.20%  | 9.50%  | 0.27 | 5.86E-01 |
| APOBEC3G     | B cell | 38.50%  | 7.50%  | 0.37 | 6.22E-01 |
| C12orf57     | B cell | 100.00% | 38.80% | 0.78 | 6.45E-01 |
| MGMT         | B cell | 69.20%  | 21.90% | 0.56 | 6.53E-01 |
| MCFD2        | B cell | 61.50%  | 15.70% | 0.31 | 7.40E-01 |
| MPG          | B cell | 76.90%  | 23.50% | 0.47 | 7.54E-01 |
| RP11-138A9.2 | B cell | 53.80%  | 12.70% | 0.34 | 7.68E-01 |
| SELT         | B cell | 100.00% | 57.40% | 0.66 | 8.08E-01 |
| RPS5         | B cell | 100.00% | 98.40% | 0.72 | 9.14E-01 |
| MSI2         | B cell | 38.50%  | 7.50%  | 0.35 | 9.18E-01 |
| PARP16       | B cell | 23.10%  | 3.00%  | 0.30 | 9.21E-01 |
| MPZL1        | B cell | 53.80%  | 13.00% | 0.30 | 9.29E-01 |
| SCO2         | B cell | 53.80%  | 14.50% | 0.44 | 9.41E-01 |
| KIAA0895L    | B cell | 15.40%  | 1.40%  | 0.26 | 9.69E-01 |
| MIR4435-1HG  | B cell | 61.50%  | 22.30% | 1.10 | 9.82E-01 |
| P4HB         | B cell | 100.00% | 51.00% | 0.62 | 1.00E+00 |
| CHMP7        | B cell | 38.50%  | 7.50%  | 0.28 | 1.00E+00 |
| AIG1         | B cell | 53.80%  | 14.70% | 0.43 | 1.00E+00 |
| CCDC69       | B cell | 38.50%  | 7.50%  | 0.28 | 1.00E+00 |
| CSN1S1       | B cell | 38.50%  | 7.30%  | 0.31 | 1.00E+00 |
| PRADC1       | B cell | 46.20%  | 10.40% | 0.29 | 1.00E+00 |
| BTG2         | B cell | 92.30%  | 46.50% | 0.83 | 1.00E+00 |
| GORASP2      | B cell | 53.80%  | 13.00% | 0.28 | 1.00E+00 |
| SERPINB9     | B cell | 92.30%  | 43.00% | 0.62 | 1.00E+00 |
| RPS19        | B cell | 100.00% | 99.70% | 0.67 | 1.00E+00 |
| MTHFS        | B cell | 38.50%  | 7.90%  | 0.36 | 1.00E+00 |
| ZNF331       | B cell | 69.20%  | 20.80% | 0.37 | 1.00E+00 |
| RPL4         | B cell | 100.00% | 95.00% | 0.73 | 1.00E+00 |
| AC006129.4   | B cell | 23.10%  | 3.10%  | 1.40 | 1.00E+00 |
| DPM2         | B cell | 61.50%  | 16.10% | 0.26 | 1.00E+00 |
| UROS         | B cell | 53.80%  | 13.50% | 0.31 | 1.00E+00 |
| TPT1         | B cell | 100.00% | 99.90% | 0.73 | 1.00E+00 |
| LGALS1       | B cell | 30.80%  | 5.40%  | 0.28 | 1.00E+00 |
| CRELD2       | B cell | 53.80%  | 13.80% | 0.33 | 1.00E+00 |
| RPL8         | B cell | 100.00% | 99.70% | 0.55 | 1.00E+00 |
| PIK3CG       | B cell | 30.80%  | 5.30%  | 0.28 | 1.00E+00 |

|          |        |         |         |      |          |
|----------|--------|---------|---------|------|----------|
| PHPT1    | B cell | 100.00% | 49.30%  | 0.63 | 1.00E+00 |
| C10orf54 | B cell | 84.60%  | 35.60%  | 0.54 | 1.00E+00 |
| NDUFS8   | B cell | 84.60%  | 37.30%  | 0.62 | 1.00E+00 |
| MZT2B    | B cell | 92.30%  | 38.90%  | 0.52 | 1.00E+00 |
| CISD2    | B cell | 76.90%  | 27.10%  | 0.53 | 1.00E+00 |
| TMEM57   | B cell | 53.80%  | 14.10%  | 0.30 | 1.00E+00 |
| ALG3     | B cell | 53.80%  | 13.90%  | 0.30 | 1.00E+00 |
| EDF1     | B cell | 100.00% | 78.30%  | 0.58 | 1.00E+00 |
| B4GALT3  | B cell | 30.80%  | 5.60%   | 0.26 | 1.00E+00 |
| MRPL53   | B cell | 30.80%  | 5.50%   | 0.27 | 1.00E+00 |
| MCEE     | B cell | 30.80%  | 5.80%   | 0.38 | 1.00E+00 |
| SRM      | B cell | 30.80%  | 5.60%   | 0.26 | 1.00E+00 |
| PELI1    | B cell | 84.60%  | 45.30%  | 1.19 | 1.00E+00 |
| MRPL34   | B cell | 84.60%  | 29.90%  | 0.41 | 1.00E+00 |
| TMED9    | B cell | 92.30%  | 56.50%  | 0.60 | 1.00E+00 |
| FAM3C    | B cell | 76.90%  | 24.50%  | 0.33 | 1.00E+00 |
| TRAM1    | B cell | 92.30%  | 44.90%  | 0.57 | 1.00E+00 |
| APOA1BP  | B cell | 53.80%  | 14.20%  | 0.42 | 1.00E+00 |
| SSSCA1   | B cell | 46.20%  | 11.00%  | 0.25 | 1.00E+00 |
| RPL41    | B cell | 100.00% | 100.00% | 0.50 | 1.00E+00 |
| DCXR     | B cell | 61.50%  | 20.10%  | 0.42 | 1.00E+00 |
| AURKAIP1 | B cell | 92.30%  | 41.30%  | 0.48 | 1.00E+00 |
| THAP2    | B cell | 61.50%  | 23.00%  | 1.21 | 1.00E+00 |
| RPS11    | B cell | 100.00% | 99.60%  | 0.55 | 1.00E+00 |
| TRAF3    | B cell | 38.50%  | 8.30%   | 0.27 | 1.00E+00 |
| FASTK    | B cell | 53.80%  | 14.70%  | 0.30 | 1.00E+00 |
| SUB1     | B cell | 100.00% | 72.40%  | 0.74 | 1.00E+00 |
| ZNF706   | B cell | 92.30%  | 58.50%  | 0.56 | 1.00E+00 |
| MRPL2    | B cell | 46.20%  | 11.80%  | 0.29 | 1.00E+00 |
| TMEM256  | B cell | 84.60%  | 41.10%  | 0.59 | 1.00E+00 |
| EIF2AK3  | B cell | 38.50%  | 8.70%   | 0.37 | 1.00E+00 |
| WDR83    | B cell | 30.80%  | 6.00%   | 0.25 | 1.00E+00 |
| MTHFD2   | B cell | 84.60%  | 37.70%  | 0.57 | 1.00E+00 |
| AMTN     | B cell | 23.10%  | 3.60%   | 0.25 | 1.00E+00 |
| SHMT2    | B cell | 53.80%  | 15.30%  | 0.34 | 1.00E+00 |
| ARMC9    | B cell | 23.10%  | 3.70%   | 0.33 | 1.00E+00 |
| TSC22D3  | B cell | 100.00% | 72.80%  | 0.85 | 1.00E+00 |
| TRAM2    | B cell | 30.80%  | 6.40%   | 0.71 | 1.00E+00 |
| IFT20    | B cell | 61.50%  | 20.10%  | 0.48 | 1.00E+00 |
| NMRK1    | B cell | 46.20%  | 11.70%  | 0.26 | 1.00E+00 |
| GNL1     | B cell | 53.80%  | 16.10%  | 0.36 | 1.00E+00 |

|         |        |         |         |      |          |
|---------|--------|---------|---------|------|----------|
| IFT57   | B cell | 46.20%  | 12.20%  | 0.32 | 1.00E+00 |
| GALNT2  | B cell | 46.20%  | 11.90%  | 0.33 | 1.00E+00 |
| TNIP1   | B cell | 84.60%  | 33.40%  | 0.48 | 1.00E+00 |
| TMEM19  | B cell | 46.20%  | 12.10%  | 0.30 | 1.00E+00 |
| ELL2    | B cell | 76.90%  | 32.50%  | 0.53 | 1.00E+00 |
| TMED10  | B cell | 92.30%  | 46.90%  | 0.44 | 1.00E+00 |
| NGLY1   | B cell | 46.20%  | 12.20%  | 0.29 | 1.00E+00 |
| SEC24D  | B cell | 53.80%  | 15.30%  | 0.28 | 1.00E+00 |
| RPSA    | B cell | 100.00% | 95.70%  | 0.67 | 1.00E+00 |
| ODF2L   | B cell | 30.80%  | 6.20%   | 0.27 | 1.00E+00 |
| NDUFV3  | B cell | 53.80%  | 16.70%  | 0.47 | 1.00E+00 |
| HM13    | B cell | 92.30%  | 35.90%  | 0.45 | 1.00E+00 |
| COPE    | B cell | 92.30%  | 70.90%  | 0.57 | 1.00E+00 |
| COMMD3  | B cell | 76.90%  | 27.90%  | 0.38 | 1.00E+00 |
| GTF3A   | B cell | 84.60%  | 40.50%  | 0.65 | 1.00E+00 |
| RPS14   | B cell | 100.00% | 99.90%  | 0.63 | 1.00E+00 |
| RNF126  | B cell | 46.20%  | 12.70%  | 0.32 | 1.00E+00 |
| BEX5    | B cell | 15.40%  | 1.90%   | 0.44 | 1.00E+00 |
| EIF2S2  | B cell | 92.30%  | 55.10%  | 0.50 | 1.00E+00 |
| A1BG    | B cell | 61.50%  | 19.30%  | 0.29 | 1.00E+00 |
| WARS    | B cell | 46.20%  | 13.20%  | 0.45 | 1.00E+00 |
| CCM2    | B cell | 46.20%  | 12.50%  | 0.32 | 1.00E+00 |
| RPL10   | B cell | 100.00% | 100.00% | 0.61 | 1.00E+00 |
| ARMCX3  | B cell | 69.20%  | 26.00%  | 0.44 | 1.00E+00 |
| IDI1    | B cell | 76.90%  | 36.90%  | 0.67 | 1.00E+00 |
| SIAE    | B cell | 15.40%  | 1.90%   | 0.28 | 1.00E+00 |
| MRPS33  | B cell | 53.80%  | 16.40%  | 0.34 | 1.00E+00 |
| ATG13   | B cell | 30.80%  | 6.60%   | 0.26 | 1.00E+00 |
| ERP29   | B cell | 100.00% | 56.60%  | 0.41 | 1.00E+00 |
| TMEM45A | B cell | 30.80%  | 6.80%   | 0.35 | 1.00E+00 |
| PDIA4   | B cell | 84.60%  | 29.70%  | 0.26 | 1.00E+00 |
| ITGA6   | B cell | 30.80%  | 6.70%   | 0.29 | 1.00E+00 |
| ANXA6   | B cell | 53.80%  | 16.10%  | 0.29 | 1.00E+00 |
| KLHDC2  | B cell | 46.20%  | 12.60%  | 0.27 | 1.00E+00 |
| SQSTM1  | B cell | 100.00% | 86.50%  | 0.93 | 1.00E+00 |
| DNAJC4  | B cell | 53.80%  | 18.80%  | 0.59 | 1.00E+00 |
| RPL23A  | B cell | 100.00% | 99.50%  | 0.52 | 1.00E+00 |
| PREB    | B cell | 38.50%  | 10.30%  | 0.39 | 1.00E+00 |
| WHSC1L1 | B cell | 61.50%  | 21.40%  | 0.44 | 1.00E+00 |
| STK16   | B cell | 38.50%  | 9.80%   | 0.29 | 1.00E+00 |
| RPL18   | B cell | 100.00% | 99.20%  | 0.60 | 1.00E+00 |

|              |        |         |         |      |          |
|--------------|--------|---------|---------|------|----------|
| HDAC9        | B cell | 38.50%  | 9.50%   | 0.33 | 1.00E+00 |
| SEC61G       | B cell | 92.30%  | 70.90%  | 0.56 | 1.00E+00 |
| INSIG2       | B cell | 38.50%  | 9.80%   | 0.33 | 1.00E+00 |
| IGSF8        | B cell | 38.50%  | 9.90%   | 0.29 | 1.00E+00 |
| CCDC22       | B cell | 30.80%  | 6.60%   | 0.29 | 1.00E+00 |
| C12orf23     | B cell | 38.50%  | 10.30%  | 0.38 | 1.00E+00 |
| CDK4         | B cell | 61.50%  | 20.40%  | 0.34 | 1.00E+00 |
| SEC13        | B cell | 69.20%  | 24.10%  | 0.29 | 1.00E+00 |
| HAX1         | B cell | 76.90%  | 29.80%  | 0.43 | 1.00E+00 |
| NHP2L1       | B cell | 84.60%  | 56.00%  | 0.60 | 1.00E+00 |
| ACP1         | B cell | 76.90%  | 28.80%  | 0.39 | 1.00E+00 |
| MAN1A2       | B cell | 46.20%  | 14.50%  | 0.43 | 1.00E+00 |
| MALAT1       | B cell | 100.00% | 100.00% | 0.58 | 1.00E+00 |
| CYBA         | B cell | 100.00% | 98.10%  | 0.98 | 1.00E+00 |
| CCDC57       | B cell | 38.50%  | 10.10%  | 0.29 | 1.00E+00 |
| DDIT4        | B cell | 84.60%  | 52.20%  | 0.86 | 1.00E+00 |
| ARFGAP3      | B cell | 76.90%  | 32.30%  | 0.42 | 1.00E+00 |
| ATRAID       | B cell | 92.30%  | 51.30%  | 0.46 | 1.00E+00 |
| OSTC         | B cell | 84.60%  | 42.60%  | 0.58 | 1.00E+00 |
| RP11-138A9.1 | B cell | 61.50%  | 20.70%  | 0.28 | 1.00E+00 |
| C19orf38     | B cell | 23.10%  | 4.30%   | 0.28 | 1.00E+00 |
| RPL13A       | B cell | 100.00% | 100.00% | 0.52 | 1.00E+00 |
| PRELID1      | B cell | 84.60%  | 41.10%  | 0.53 | 1.00E+00 |
| RPL35        | B cell | 100.00% | 99.60%  | 0.40 | 1.00E+00 |
| CCPG1        | B cell | 76.90%  | 32.80%  | 0.43 | 1.00E+00 |
| DNAJC3       | B cell | 76.90%  | 35.60%  | 0.48 | 1.00E+00 |
| CIRBP        | B cell | 100.00% | 75.30%  | 0.56 | 1.00E+00 |
| RPS18        | B cell | 100.00% | 99.90%  | 0.58 | 1.00E+00 |
| ITPR3        | B cell | 23.10%  | 4.60%   | 0.31 | 1.00E+00 |
| PTPN1        | B cell | 84.60%  | 36.40%  | 0.36 | 1.00E+00 |
| UAP1         | B cell | 84.60%  | 32.60%  | 0.26 | 1.00E+00 |
| GCHFR        | B cell | 46.20%  | 14.90%  | 0.37 | 1.00E+00 |
| TRIB1        | B cell | 61.50%  | 32.40%  | 1.00 | 1.00E+00 |
| LY96         | B cell | 92.30%  | 52.40%  | 0.43 | 1.00E+00 |
| MRPS11       | B cell | 46.20%  | 13.90%  | 0.29 | 1.00E+00 |
| RAB27A       | B cell | 30.80%  | 7.50%   | 0.26 | 1.00E+00 |
| MIR155HG     | B cell | 69.20%  | 31.50%  | 0.75 | 1.00E+00 |
| UFC1         | B cell | 92.30%  | 49.00%  | 0.47 | 1.00E+00 |
| RPL18A       | B cell | 100.00% | 99.70%  | 0.59 | 1.00E+00 |
| NXT1         | B cell | 53.80%  | 18.10%  | 0.29 | 1.00E+00 |
| SCFD1        | B cell | 53.80%  | 20.00%  | 0.40 | 1.00E+00 |

|          |        |         |         |      |          |
|----------|--------|---------|---------|------|----------|
| TMED3    | B cell | 53.80%  | 18.80%  | 0.35 | 1.00E+00 |
| RPS3     | B cell | 100.00% | 99.60%  | 0.41 | 1.00E+00 |
| RPL5     | B cell | 100.00% | 98.70%  | 0.61 | 1.00E+00 |
| RPL14    | B cell | 100.00% | 99.10%  | 0.39 | 1.00E+00 |
| TMEM243  | B cell | 61.50%  | 25.50%  | 0.52 | 1.00E+00 |
| MAGED2   | B cell | 61.50%  | 24.40%  | 0.45 | 1.00E+00 |
| PSENN    | B cell | 84.60%  | 39.70%  | 0.34 | 1.00E+00 |
| MARS     | B cell | 38.50%  | 11.30%  | 0.29 | 1.00E+00 |
| RPS8     | B cell | 100.00% | 99.70%  | 0.48 | 1.00E+00 |
| NDUFA3   | B cell | 76.90%  | 36.20%  | 0.42 | 1.00E+00 |
| TLK1     | B cell | 38.50%  | 11.00%  | 0.25 | 1.00E+00 |
| PQBP1    | B cell | 69.20%  | 28.40%  | 0.32 | 1.00E+00 |
| PPIB     | B cell | 92.30%  | 73.00%  | 0.54 | 1.00E+00 |
| RNASEH2C | B cell | 69.20%  | 26.10%  | 0.29 | 1.00E+00 |
| MZT2A    | B cell | 46.20%  | 15.80%  | 0.32 | 1.00E+00 |
| SRA1     | B cell | 61.50%  | 22.40%  | 0.29 | 1.00E+00 |
| GUSB     | B cell | 69.20%  | 27.70%  | 0.42 | 1.00E+00 |
| MRPL52   | B cell | 84.60%  | 40.60%  | 0.47 | 1.00E+00 |
| STX5     | B cell | 61.50%  | 25.20%  | 0.39 | 1.00E+00 |
| JTB      | B cell | 84.60%  | 58.10%  | 0.59 | 1.00E+00 |
| PSMD2    | B cell | 69.20%  | 27.20%  | 0.33 | 1.00E+00 |
| SLC7A5   | B cell | 53.80%  | 18.10%  | 0.32 | 1.00E+00 |
| BHLHE41  | B cell | 38.50%  | 11.40%  | 0.47 | 1.00E+00 |
| COA1     | B cell | 38.50%  | 11.50%  | 0.25 | 1.00E+00 |
| VOPP1    | B cell | 76.90%  | 37.00%  | 0.60 | 1.00E+00 |
| FAM207A  | B cell | 30.80%  | 8.40%   | 0.30 | 1.00E+00 |
| IFI35    | B cell | 46.20%  | 15.20%  | 0.27 | 1.00E+00 |
| AKAP9    | B cell | 76.90%  | 46.10%  | 0.49 | 1.00E+00 |
| C1orf122 | B cell | 61.50%  | 24.50%  | 0.31 | 1.00E+00 |
| MRPL55   | B cell | 61.50%  | 24.00%  | 0.36 | 1.00E+00 |
| EHMT1    | B cell | 38.50%  | 11.30%  | 0.28 | 1.00E+00 |
| NANS     | B cell | 84.60%  | 44.40%  | 0.45 | 1.00E+00 |
| RPL27A   | B cell | 100.00% | 99.90%  | 0.35 | 1.00E+00 |
| PCGF5    | B cell | 53.80%  | 21.40%  | 0.47 | 1.00E+00 |
| RPL24    | B cell | 100.00% | 98.60%  | 0.43 | 1.00E+00 |
| NOSIP    | B cell | 61.50%  | 22.90%  | 0.29 | 1.00E+00 |
| RPL15    | B cell | 100.00% | 100.00% | 0.38 | 1.00E+00 |
| RPS28    | B cell | 100.00% | 100.00% | 0.50 | 1.00E+00 |
| ATP5A1   | B cell | 92.30%  | 54.80%  | 0.35 | 1.00E+00 |
| C7orf50  | B cell | 53.80%  | 22.30%  | 0.41 | 1.00E+00 |
| BSG      | B cell | 100.00% | 60.10%  | 0.36 | 1.00E+00 |

|          |        |         |         |      |          |
|----------|--------|---------|---------|------|----------|
| DNAJC10  | B cell | 46.20%  | 17.00%  | 0.31 | 1.00E+00 |
| GOLGA2   | B cell | 53.80%  | 18.90%  | 0.26 | 1.00E+00 |
| DAPP1    | B cell | 38.50%  | 12.70%  | 0.39 | 1.00E+00 |
| DPP7     | B cell | 84.60%  | 58.00%  | 0.64 | 1.00E+00 |
| C12orf44 | B cell | 69.20%  | 28.80%  | 0.38 | 1.00E+00 |
| SARS     | B cell | 69.20%  | 30.30%  | 0.30 | 1.00E+00 |
| EMC4     | B cell | 69.20%  | 28.90%  | 0.29 | 1.00E+00 |
| PDE4B    | B cell | 76.90%  | 35.50%  | 0.39 | 1.00E+00 |
| RPL35A   | B cell | 100.00% | 99.70%  | 0.39 | 1.00E+00 |
| RPL13    | B cell | 100.00% | 100.00% | 0.35 | 1.00E+00 |
| OPTN     | B cell | 46.20%  | 15.90%  | 0.32 | 1.00E+00 |
| NARF     | B cell | 46.20%  | 16.80%  | 0.61 | 1.00E+00 |
| FNBP1    | B cell | 76.90%  | 40.40%  | 0.48 | 1.00E+00 |
| HDLBP    | B cell | 84.60%  | 40.90%  | 0.41 | 1.00E+00 |
| RNF7     | B cell | 84.60%  | 37.30%  | 0.30 | 1.00E+00 |
| GTF2E1   | B cell | 15.40%  | 2.70%   | 0.93 | 1.00E+00 |
| UQCRH    | B cell | 100.00% | 72.30%  | 0.53 | 1.00E+00 |
| PSMB8    | B cell | 61.50%  | 27.30%  | 0.36 | 1.00E+00 |
| RPL6     | B cell | 100.00% | 99.30%  | 0.43 | 1.00E+00 |
| PDIA6    | B cell | 76.90%  | 52.00%  | 0.58 | 1.00E+00 |
| PRMT1    | B cell | 69.20%  | 29.10%  | 0.28 | 1.00E+00 |
| CLPTM1L  | B cell | 38.50%  | 12.60%  | 0.31 | 1.00E+00 |
| RPL22L1  | B cell | 84.60%  | 44.60%  | 0.46 | 1.00E+00 |
| ASCC3    | B cell | 30.80%  | 9.00%   | 0.25 | 1.00E+00 |
| DOK3     | B cell | 23.10%  | 5.70%   | 0.28 | 1.00E+00 |
| ANKRD36  | B cell | 46.20%  | 16.30%  | 0.37 | 1.00E+00 |
| RAC2     | B cell | 53.80%  | 20.80%  | 0.26 | 1.00E+00 |
| MRPS18B  | B cell | 46.20%  | 16.30%  | 0.29 | 1.00E+00 |
| GYPC     | B cell | 92.30%  | 44.10%  | 0.30 | 1.00E+00 |
| DAD1     | B cell | 100.00% | 62.30%  | 0.37 | 1.00E+00 |
| SPSB3    | B cell | 53.80%  | 20.90%  | 0.28 | 1.00E+00 |
| ZBTB38   | B cell | 69.20%  | 34.60%  | 0.58 | 1.00E+00 |
| RBM33    | B cell | 38.50%  | 12.50%  | 0.37 | 1.00E+00 |
| TPST2    | B cell | 46.20%  | 18.80%  | 0.37 | 1.00E+00 |
| RPL10A   | B cell | 100.00% | 99.10%  | 0.44 | 1.00E+00 |
| RSL24D1  | B cell | 84.60%  | 54.80%  | 0.44 | 1.00E+00 |
| NSMCE2   | B cell | 38.50%  | 13.20%  | 0.28 | 1.00E+00 |
| THEMIS2  | B cell | 61.50%  | 25.20%  | 0.28 | 1.00E+00 |
| SEC63    | B cell | 61.50%  | 27.40%  | 0.48 | 1.00E+00 |
| RPL9     | B cell | 100.00% | 99.70%  | 0.34 | 1.00E+00 |
| RPLP2    | B cell | 100.00% | 100.00% | 0.34 | 1.00E+00 |

|              |        |        |        |      |          |
|--------------|--------|--------|--------|------|----------|
| XRN1         | B cell | 38.50% | 13.70% | 0.33 | 1.00E+00 |
| ISCU         | B cell | 92.30% | 51.50% | 0.42 | 1.00E+00 |
| YIPF3        | B cell | 69.20% | 30.00% | 0.29 | 1.00E+00 |
| GLG1         | B cell | 46.20% | 17.90% | 0.43 | 1.00E+00 |
| MPC2         | B cell | 84.60% | 44.10% | 0.35 | 1.00E+00 |
| TMEM141      | B cell | 46.20% | 17.50% | 0.31 | 1.00E+00 |
| TAGAP        | B cell | 53.80% | 21.90% | 0.37 | 1.00E+00 |
| RP11-38614.4 | B cell | 46.20% | 17.90% | 0.34 | 1.00E+00 |
| LDHB         | B cell | 53.80% | 26.70% | 0.57 | 1.00E+00 |
| TOP1         | B cell | 76.90% | 43.50% | 0.39 | 1.00E+00 |
| UBE2G1       | B cell | 46.20% | 17.40% | 0.27 | 1.00E+00 |
| MAGEH1       | B cell | 30.80% | 9.50%  | 0.26 | 1.00E+00 |
| GLRX         | B cell | 92.30% | 72.40% | 0.53 | 1.00E+00 |



**Supplementary Table S2.** Evaluation of existing bulk gene expression data from OA and control synovial for key markers of pathogenic subsets in OA based on scRNA-seq.

| Dataset Reference                                                                                                                                                                                                                                                                                                                                                                                                                       | HLA-DRA                                                                                                                                                  | HLA-DQA1                                                                                                                                        | HLA-DQA2                                                                                                                                        | OLR1                                                                                                                                           | TLR2                                                                                                                  | Source of control synovium                                                                                           | Comments                                                                                                                                                                                                                                                                                                                                            |
|-----------------------------------------------------------------------------------------------------------------------------------------------------------------------------------------------------------------------------------------------------------------------------------------------------------------------------------------------------------------------------------------------------------------------------------------|----------------------------------------------------------------------------------------------------------------------------------------------------------|-------------------------------------------------------------------------------------------------------------------------------------------------|-------------------------------------------------------------------------------------------------------------------------------------------------|------------------------------------------------------------------------------------------------------------------------------------------------|-----------------------------------------------------------------------------------------------------------------------|----------------------------------------------------------------------------------------------------------------------|-----------------------------------------------------------------------------------------------------------------------------------------------------------------------------------------------------------------------------------------------------------------------------------------------------------------------------------------------------|
| <b>GSE1919</b><br>Ungethuem, U. et al. Molecular signatures and new candidates to target the pathogenesis of rheumatoid arthritis. <i>Physiological genomics</i> 42a, 267-282, doi:10.1152/physiolgenomics.00004.2010 (2010). PMID: 20858714                                                                                                                                                                                            | No difference ( $p > 0.05$ )<br>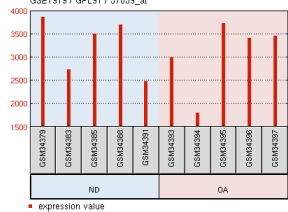                                        | High in OA, low in ND<br>$\logFC=1.72$ , $p=0.023$<br>        | No data                                                                                                                                         | High in OA, low in ND<br>$\logFC=2.13$ , $p=0.0047$<br>     | No difference ( $p > 0.05$ )<br>   | 72 synovia from a tissue bank of fatal accident victims                                                              | Time from death to acquisition and storage not indicated; Individuals had "no or slightly inflamed synovial membranes"; according to these data, relative to normal donors, some canonical cytokines, such as TNFalpha were downregulated in rheumatoid arthritis (RA)                                                                              |
| <b>GSE41038</b><br>Thomas, G. P. et al. Expression profiling in spondyloarthritis synovial biopsies highlights changes in expression of inflammatory genes in conjunction with tissue remodelling genes. <i>BMC Musculoskelet Disord</i> 14, 354, doi:10.1186/1471-2474-14-354 (2013). PMID: 24330574                                                                                                                                   | No difference ( $p > 0.05$ )<br>                                        | No data                                                                                                                                         | No difference ( $p > 0.05$ )<br>                             | No difference ( $p > 0.05$ )<br>                            | No difference ( $p > 0.05$ )<br>   | 4 normal controls from a synovial tissue bank                                                                        | Means of acquisition by arthroscopic; clinical indication for arthroscopy not specified; no report of macroscopic investigation of cartilage of controls; not specified whether tissues were from a non-arthritic/non-trauma individual or from a macroscopically normal region of synovium of a patient with indication for arthroscopic procedure |
| <b>GSE55457</b><br>Woetzel, D. et al. Identification of rheumatoid arthritis and osteoarthritis patients by transcriptome-based rule set generation. <i>Arthritis Res Ther</i> 16, R84, doi:10.1186/ar4526 (2014). PMID: 24690414                                                                                                                                                                                                       | No difference ( $p > 0.05$ )<br>                                      | High in OA, low in ND<br>$\logFC=2.88$ , $p=0.014$<br>      | High in OA, low in ND<br>$\logFC=0.97$ , $p=0.042$<br>     | No difference ( $p > 0.05$ )<br>                          | No difference ( $p > 0.05$ )<br> | 10 normal donors and 10 OA                                                                                           | Synovial membrane samples were obtained from postmortem joints (n=15) or traumatic joint injury cases (n = 5); Time from death or injury to acquisition and storage not indicated                                                                                                                                                                   |
| <b>GSE55235</b><br>Woetzel, D. et al. Identification of rheumatoid arthritis and osteoarthritis patients by transcriptome-based rule set generation. <i>Arthritis Res Ther</i> 16, R84, doi:10.1186/ar4526 (2014). PMID: 24690414                                                                                                                                                                                                       | High in OA, low in ND<br>$\logFC=1.56$ , $p= 1.92E-03$<br>            | High in OA, low in ND<br>$\logFC=2.57$ , $p= 9.68E-05$<br>  | High in OA, low in ND<br>$\logFC=2.57$ , $p= 9.68E-05$<br> | High in OA, low in ND<br>$\logFC=2.33$ , $p=1.89E-06$<br> | No difference ( $p > 0.05$ )<br> | 10 normal donors and 10 OA                                                                                           | As described above in table, datasets used each have major confounds with respect to the condition of normal or control synovium                                                                                                                                                                                                                    |
| Data for 896 differentially expressed genes at <a href="http://onlinelibrary.wiley.com/doi/10.1002/art.38315">http://onlinelibrary.wiley.com/doi/10.1002/art.38315</a> see <a href="#">ART_38315_sm_SupplTable.docx</a><br>Lambert, C. et al. Gene expression pattern of cells from inflamed and normal areas of osteoarthritis synovial membrane. <i>Arthritis Rheumatol</i> 66, 960-968, doi:10.1002/art.38315 (2014). PMID: 24757147 | inflamed vs matched non-inflamed synovia<br>$FC = 3.25$ to $4.51$<br> | inflamed vs matched non-inflamed synovia<br>$FC = 2.71$<br> | No data                                                                                                                                         | No difference                                                                                                                                  | No difference                                                                                                         | 12 knee OA synovial specimens from knee replacement comparing inflamed vs normal synovia regions within each patient | The first to identify different expression patterns between 2 areas of the synovial membrane from the same patient (inflamed vs normal or reactive by Ayril criteria); gene expression performed after 7 days' cell culture                                                                                                                         |

Profile graphs show expression in normal donor highlighted in blue, expression in OA highlighted in red. OA=osteoarthritic

**Supplementary Table S3.** List of differentially expressed genes in osteoarthritic chondrocytes from non-damaged and damaged cartilages.

| Gene      | The percentage of cells expressing the gene in MT | The percentage of cells expressing the gene in oLT | Log fold-change of the average expression between the two groups | Adjusted p-value (Bonferroni correction) |
|-----------|---------------------------------------------------|----------------------------------------------------|------------------------------------------------------------------|------------------------------------------|
| S100A4    | 0.909                                             | 37.50%                                             | 209.05%                                                          | 0                                        |
| COL1A1    | 0.271                                             | 2.00%                                              | 168.95%                                                          | 0                                        |
| COL1A2    | 0.825                                             | 26.70%                                             | 164.82%                                                          | 0                                        |
| COL3A1    | 0.966                                             | 61.50%                                             | 153.62%                                                          | 0                                        |
| TMSB4X    | 0.877                                             | 68.20%                                             | 150.40%                                                          | 0                                        |
| HTRA1     | 0.985                                             | 67.20%                                             | 148.73%                                                          | 0                                        |
| FN1       | 1                                                 | 99.80%                                             | 133.98%                                                          | 0                                        |
| OGN       | 0.945                                             | 69.20%                                             | 129.69%                                                          | 0                                        |
| CRTAC1    | 0.923                                             | 59.50%                                             | 129.47%                                                          | 0                                        |
| TNFRSF11B | 0.896                                             | 69.90%                                             | 121.62%                                                          | 0                                        |
| TGFB1     | 0.673                                             | 15.70%                                             | 119.77%                                                          | 0                                        |
| ASPN      | 0.802                                             | 43.80%                                             | 118.75%                                                          | 0                                        |
| TNFAIP6   | 0.383                                             | 5.50%                                              | 114.13%                                                          | 0                                        |
| SERPINE2  | 0.855                                             | 40.90%                                             | 107.60%                                                          | 0                                        |
| COL6A3    | 0.811                                             | 35.30%                                             | 102.24%                                                          | 0                                        |
| MT1G      | 0.883                                             | 62.50%                                             | 101.15%                                                          | 0                                        |
| CD55      | 0.85                                              | 59.70%                                             | 98.80%                                                           | 0                                        |
| TNC       | 0.737                                             | 31.80%                                             | 88.87%                                                           | 0                                        |
| TPPP3     | 0.47                                              | 10.90%                                             | 88.34%                                                           | 0                                        |
| COMP      | 1                                                 | 99.80%                                             | 86.58%                                                           | 0                                        |
| CRLF1     | 0.503                                             | 4.30%                                              | 82.48%                                                           | 0                                        |
| OMD       | 0.838                                             | 49.90%                                             | 78.05%                                                           | 0                                        |
| PTGES     | 0.614                                             | 17.10%                                             | 77.19%                                                           | 0                                        |
| TSPAN2    | 0.883                                             | 55.60%                                             | 76.56%                                                           | 0                                        |
| COL5A1    | 0.792                                             | 30.20%                                             | 74.67%                                                           | 0                                        |
| COL6A1    | 0.904                                             | 75.40%                                             | 73.71%                                                           | 0                                        |
| THY1      | 0.457                                             | 5.00%                                              | 72.09%                                                           | 0                                        |
| SERPINE1  | 0.659                                             | 21.50%                                             | 71.36%                                                           | 0                                        |
| S100A6    | 1                                                 | 99.90%                                             | 71.28%                                                           | 0                                        |
| VCAN      | 0.487                                             | 10.00%                                             | 70.15%                                                           | 0                                        |
| CILP      | 0.971                                             | 84.30%                                             | 70.04%                                                           | 0                                        |
| ABI3BP    | 0.713                                             | 29.10%                                             | 67.46%                                                           | 0                                        |

|           |       |        |        |   |
|-----------|-------|--------|--------|---|
| COL6A2    | 0.941 | 81.60% | 67.40% | 0 |
| IL11      | 0.143 | 0.30%  | 66.45% | 0 |
| TAGLN2    | 0.94  | 66.00% | 65.45% | 0 |
| AKR1C2    | 0.692 | 25.10% | 64.55% | 0 |
| PRSS23    | 0.449 | 13.70% | 64.20% | 0 |
| AQP1      | 0.217 | 1.70%  | 61.55% | 0 |
| COL15A1   | 0.606 | 16.20% | 59.82% | 0 |
| S100A10   | 0.999 | 98.80% | 58.98% | 0 |
| CILP2     | 0.856 | 66.90% | 57.41% | 0 |
| SMOC1     | 0.721 | 27.10% | 57.10% | 0 |
| CAPS      | 0.642 | 19.80% | 56.31% | 0 |
| NGF       | 0.467 | 5.20%  | 55.99% | 0 |
| DKK3      | 0.639 | 24.30% | 55.97% | 0 |
| LUM       | 0.999 | 99.80% | 55.66% | 0 |
| GAS1      | 0.642 | 23.50% | 55.56% | 0 |
| ANKH      | 0.882 | 60.50% | 53.55% | 0 |
| AK1       | 0.962 | 77.10% | 53.19% | 0 |
| SPARC     | 0.995 | 95.50% | 52.12% | 0 |
| SRPX2     | 0.767 | 40.20% | 51.65% | 0 |
| COL5A2    | 0.831 | 49.90% | 51.51% | 0 |
| ANGPTL2   | 0.984 | 82.30% | 51.39% | 0 |
| FSTL1     | 0.811 | 51.70% | 51.36% | 0 |
| PRELP     | 0.998 | 99.60% | 51.13% | 0 |
| MT1F      | 0.816 | 57.40% | 50.13% | 0 |
| DPT       | 0.518 | 24.30% | 47.14% | 0 |
| CD151     | 0.927 | 74.90% | 47.02% | 0 |
| UGP2      | 0.948 | 79.70% | 46.70% | 0 |
| ADAMTS6   | 0.639 | 22.40% | 46.63% | 0 |
| SPP1      | 0.505 | 23.40% | 46.51% | 0 |
| NT5E      | 0.668 | 31.40% | 46.32% | 0 |
| ATP5E     | 0.99  | 92.40% | 45.05% | 0 |
| NBL1      | 0.3   | 5.80%  | 43.87% | 0 |
| PART1     | 0.628 | 27.70% | 43.62% | 0 |
| SH3BGRL3  | 0.99  | 94.40% | 42.64% | 0 |
| EMP3      | 0.975 | 87.90% | 42.39% | 0 |
| TNFRSF12A | 0.865 | 55.90% | 42.20% | 0 |
| PDLIM7    | 0.537 | 13.80% | 42.13% | 0 |
| NOVA1     | 0.564 | 24.20% | 41.97% | 0 |
| FMOD      | 0.992 | 99.20% | 41.14% | 0 |
| CAV1      | 0.884 | 66.90% | 40.82% | 0 |
| CLIC3     | 0.308 | 3.50%  | 40.67% | 0 |

|         |       |         |        |   |
|---------|-------|---------|--------|---|
| IGFBP7  | 0.812 | 39.30%  | 40.56% | 0 |
| LOXL2   | 0.457 | 10.40%  | 40.56% | 0 |
| OSTC    | 0.929 | 75.30%  | 40.02% | 0 |
| DNER    | 0.412 | 4.20%   | 39.90% | 0 |
| IGFBP4  | 0.385 | 5.00%   | 39.69% | 0 |
| PID1    | 0.809 | 51.00%  | 39.42% | 0 |
| TREM1   | 0.202 | 0.50%   | 38.32% | 0 |
| UROC1   | 0.388 | 9.00%   | 38.31% | 0 |
| FNIP2   | 0.574 | 22.20%  | 38.07% | 0 |
| PFKP    | 0.834 | 55.20%  | 38.04% | 0 |
| PMP22   | 0.958 | 83.70%  | 38.02% | 0 |
| TIMP2   | 0.829 | 61.40%  | 37.87% | 0 |
| MXRA5   | 0.389 | 10.50%  | 37.75% | 0 |
| TNXB    | 0.464 | 19.60%  | 37.73% | 0 |
| S100A11 | 0.988 | 94.10%  | 37.65% | 0 |
| PLP2    | 0.957 | 80.60%  | 36.67% | 0 |
| CAPG    | 0.751 | 48.20%  | 36.43% | 0 |
| CDA     | 0.529 | 21.60%  | 36.09% | 0 |
| ITGB5   | 0.462 | 15.30%  | 35.95% | 0 |
| RPL28   | 1     | 99.90%  | 35.91% | 0 |
| CD68    | 0.616 | 26.10%  | 35.78% | 0 |
| TM4SF1  | 0.784 | 48.20%  | 35.68% | 0 |
| AEBP1   | 0.921 | 76.70%  | 35.58% | 0 |
| PLAUR   | 0.511 | 18.70%  | 35.42% | 0 |
| CCND1   | 0.279 | 5.60%   | 34.96% | 0 |
| HCFC1R1 | 0.784 | 49.30%  | 34.80% | 0 |
| GAPDH   | 1     | 100.00% | 34.62% | 0 |
| THBS3   | 0.533 | 17.70%  | 33.95% | 0 |
| PRKCDBP | 0.877 | 66.90%  | 33.90% | 0 |
| CRIP1   | 0.496 | 22.30%  | 33.40% | 0 |
| GNG11   | 0.709 | 37.90%  | 33.27% | 0 |
| SLC7A2  | 0.507 | 24.90%  | 33.18% | 0 |
| PROCR   | 0.675 | 38.50%  | 32.87% | 0 |
| PAPPA   | 0.216 | 4.00%   | 32.81% | 0 |
| COX17   | 0.861 | 63.00%  | 32.62% | 0 |
| RABAC1  | 0.993 | 93.30%  | 32.49% | 0 |
| OAZ1    | 0.999 | 99.00%  | 31.27% | 0 |
| LOX     | 0.539 | 24.70%  | 31.20% | 0 |
| NDUFB2  | 0.925 | 73.90%  | 31.12% | 0 |
| C7orf73 | 0.898 | 68.00%  | 30.87% | 0 |
| YIF1A   | 0.82  | 54.10%  | 30.84% | 0 |

|               |       |         |        |           |
|---------------|-------|---------|--------|-----------|
| VKORC1        | 0.992 | 93.40%  | 30.27% | 0         |
| LOXL3         | 0.536 | 19.90%  | 29.96% | 0         |
| RPLP0         | 1     | 99.90%  | 29.26% | 0         |
| FAP           | 0.466 | 16.40%  | 29.19% | 0         |
| ECM1          | 0.266 | 5.90%   | 29.10% | 0         |
| PPIC          | 0.87  | 61.50%  | 28.79% | 0         |
| S100A2        | 0.168 | 2.10%   | 28.44% | 0         |
| ANK3          | 0.529 | 20.80%  | 27.93% | 0         |
| LTBP1         | 0.531 | 26.30%  | 27.38% | 0         |
| ADAMTS5       | 0.254 | 4.80%   | 27.29% | 0         |
| NDUFS8        | 0.61  | 31.50%  | 26.83% | 0         |
| PGAM1         | 0.968 | 88.00%  | 26.74% | 0         |
| CNIH1         | 0.804 | 55.60%  | 26.70% | 0         |
| C10orf105     | 0.371 | 6.60%   | 26.67% | 0         |
| CDON          | 0.624 | 28.70%  | 26.46% | 0         |
| RPS12         | 1     | 100.00% | 26.30% | 0         |
| HSD3B7        | 0.272 | 4.90%   | 26.27% | 0         |
| COX7B         | 0.919 | 74.10%  | 26.26% | 0         |
| NDUFA11       | 0.959 | 83.80%  | 26.21% | 0         |
| RAB13         | 0.868 | 66.10%  | 26.04% | 0         |
| DOK1          | 0.548 | 25.70%  | 25.99% | 0         |
| MRC2          | 0.698 | 38.30%  | 25.89% | 0         |
| TMEM167A      | 0.787 | 52.00%  | 25.86% | 0         |
| ATOX1         | 0.832 | 57.70%  | 25.72% | 0         |
| RPS24         | 1     | 99.80%  | 25.56% | 0         |
| MPG           | 0.745 | 44.80%  | 25.46% | 0         |
| REXO2         | 0.943 | 79.60%  | 25.40% | 0         |
| SEC61G        | 0.991 | 94.10%  | 25.38% | 0         |
| DIXDC1        | 0.716 | 42.50%  | 25.26% | 0         |
| TRPS1         | 0.702 | 41.80%  | 25.21% | 0         |
| RP11-572C15.6 | 0.47  | 22.50%  | 25.21% | 0         |
| GRN           | 0.794 | 56.60%  | 25.15% | 0         |
| LTBP2         | 0.537 | 24.50%  | 25.06% | 0         |
| SGK1          | 0.609 | 35.70%  | 27.85% | 3.24E-300 |
| RCAN1         | 0.791 | 57.00%  | 34.85% | 7.46E-296 |
| CFD           | 0.111 | 0.80%   | 36.78% | 3.14E-290 |
| TNNT3         | 0.448 | 23.70%  | 49.71% | 1.96E-287 |
| CXCL14        | 0.132 | 1.80%   | 42.93% | 3.33E-283 |
| SMOC2         | 0.933 | 87.00%  | 32.26% | 3.66E-280 |
| SLC39A14      | 0.826 | 65.40%  | 26.37% | 4.12E-278 |
| ANXA2         | 0.995 | 96.50%  | 28.59% | 1.72E-275 |

|           |       |         |          |           |
|-----------|-------|---------|----------|-----------|
| COL2A1    | 0.964 | 88.60%  | 62.15%   | 2.18E-272 |
| ADAMTS1   | 0.29  | 11.40%  | 25.31%   | 3.70E-269 |
| MT1H      | 0.38  | 18.00%  | 25.55%   | 2.16E-256 |
| ARPC1B    | 0.731 | 51.70%  | 28.95%   | 8.82E-252 |
| AMTN      | 0.179 | 4.80%   | 28.89%   | 1.50E-245 |
| CAPZB     | 0.746 | 53.60%  | 28.69%   | 1.52E-243 |
| INHBA     | 0.79  | 60.60%  | 40.43%   | 4.56E-227 |
| MSMP      | 0.126 | 2.70%   | 39.99%   | 1.46E-201 |
| CCDC80    | 0.928 | 79.90%  | 33.00%   | 1.20E-197 |
| MYL6      | 0.997 | 97.40%  | 25.49%   | 4.31E-195 |
| SMIM14    | 0.783 | 59.60%  | 25.05%   | 1.13E-194 |
| CKB       | 0.455 | 27.80%  | 29.42%   | 8.83E-184 |
| PFN1      | 0.935 | 83.40%  | 29.89%   | 2.51E-183 |
| TIMP1     | 0.999 | 99.10%  | 37.10%   | 1.00E-174 |
| ENPP1     | 0.787 | 62.40%  | 29.00%   | 7.98E-164 |
| AQP3      | 0.436 | 27.90%  | 41.26%   | 1.34E-151 |
| C2orf40   | 0.997 | 100.00% | 48.22%   | 2.96E-133 |
| MGST3     | 0.875 | 74.80%  | 26.34%   | 3.05E-119 |
| MYL9      | 0.374 | 22.80%  | 41.20%   | 4.51E-113 |
| TMSB10    | 0.848 | 71.70%  | 49.77%   | 5.47E-113 |
| ISLR      | 0.803 | 69.30%  | 35.02%   | 5.93E-104 |
| CALD1     | 0.852 | 71.60%  | 27.72%   | 6.40E-78  |
| TIMP3     | 0.607 | 49.30%  | 46.62%   | 8.86E-70  |
| LGALS1    | 0.946 | 90.50%  | 62.70%   | 1.07E-65  |
| RGS2      | 0.522 | 40.90%  | 25.55%   | 6.18E-54  |
| PRG4      | 0.403 | 33.60%  | 40.04%   | 3.53E-05  |
| TAGLN     | 0.198 | 21.30%  | 53.37%   | 1         |
| CFH1      | 0.884 | 98.40%  | -160.02% | 0         |
| FRZB1     | 0.604 | 96.70%  | -156.28% | 0         |
| APOD1     | 0.628 | 83.70%  | -128.51% | 0         |
| CHI3L11   | 0.692 | 83.10%  | -120.40% | 0         |
| JUN       | 0.875 | 95.50%  | -119.77% | 0         |
| CRISPLD11 | 0.325 | 62.40%  | -119.05% | 0         |
| FOSB1     | 0.738 | 92.70%  | -112.31% | 0         |
| MMP31     | 0.412 | 64.40%  | -111.73% | 0         |
| CHRD121   | 0.062 | 39.70%  | -109.12% | 0         |
| ZFP361    | 0.919 | 97.80%  | -108.13% | 0         |
| FOS1      | 0.958 | 99.00%  | -101.13% | 0         |
| SOD31     | 0.884 | 93.80%  | -94.24%  | 0         |
| MEG31     | 0.342 | 64.00%  | -86.07%  | 0         |
| JUNB1     | 0.988 | 99.50%  | -85.71%  | 0         |

|           |       |         |         |   |
|-----------|-------|---------|---------|---|
| HAPLN11   | 0.92  | 96.80%  | -85.28% | 0 |
| MIR24-21  | 0.536 | 78.20%  | -83.61% | 0 |
| GPX31     | 0.984 | 99.10%  | -79.28% | 0 |
| GEM1      | 0.706 | 84.40%  | -79.09% | 0 |
| GDF101    | 0.45  | 75.50%  | -77.67% | 0 |
| STC21     | 0.298 | 52.30%  | -76.65% | 0 |
| KLF41     | 0.775 | 87.30%  | -76.54% | 0 |
| IER21     | 0.84  | 87.80%  | -72.43% | 0 |
| RBP41     | 0.606 | 77.10%  | -70.95% | 0 |
| PPP1R15A1 | 0.67  | 78.80%  | -69.95% | 0 |
| RASD11    | 0.505 | 72.30%  | -69.77% | 0 |
| SOCS31    | 0.763 | 82.30%  | -67.36% | 0 |
| ATF31     | 0.466 | 65.50%  | -66.94% | 0 |
| BTG21     | 0.651 | 76.80%  | -66.40% | 0 |
| DDIT41    | 0.4   | 59.60%  | -65.22% | 0 |
| SLPI1     | 0.106 | 30.80%  | -62.44% | 0 |
| COL9A31   | 0.838 | 92.90%  | -62.05% | 0 |
| NR4A11    | 0.49  | 65.20%  | -61.11% | 0 |
| RARRES21  | 0.191 | 47.60%  | -60.05% | 0 |
| ACAN1     | 0.936 | 98.60%  | -59.60% | 0 |
| CDKN1A1   | 0.777 | 86.70%  | -59.50% | 0 |
| SRSF71    | 0.83  | 86.40%  | -59.17% | 0 |
| TSC22D11  | 0.946 | 98.90%  | -58.45% | 0 |
| CCNL11    | 0.827 | 89.10%  | -57.18% | 0 |
| SLC14A11  | 0.24  | 53.60%  | -56.32% | 0 |
| EGR11     | 0.883 | 93.00%  | -55.94% | 0 |
| NDRG21    | 0.552 | 75.80%  | -55.69% | 0 |
| BTG11     | 0.896 | 93.70%  | -55.21% | 0 |
| MALAT11   | 1     | 100.00% | -54.96% | 0 |
| SERTAD11  | 0.763 | 86.30%  | -54.76% | 0 |
| WWP21     | 0.783 | 85.40%  | -54.16% | 0 |
| CYTL11    | 0.834 | 91.30%  | -53.98% | 0 |
| DDX51     | 0.986 | 98.60%  | -53.76% | 0 |
| ADM1      | 0.353 | 56.50%  | -52.73% | 0 |
| GPC61     | 0.636 | 79.20%  | -52.33% | 0 |
| PNRC11    | 0.702 | 79.80%  | -52.17% | 0 |
| TUBB4B1   | 0.808 | 86.50%  | -51.25% | 0 |
| JUND1     | 0.734 | 82.10%  | -50.63% | 0 |
| SPINT21   | 0.839 | 94.00%  | -50.18% | 0 |
| HSPA1B1   | 0.572 | 73.20%  | -49.94% | 0 |
| UBC1      | 0.996 | 99.80%  | -49.93% | 0 |

|                    |       |        |         |   |
|--------------------|-------|--------|---------|---|
| NR4A21             | 0.533 | 66.90% | -49.57% | 0 |
| CSRNP11            | 0.618 | 75.00% | -48.89% | 0 |
| KLF101             | 0.502 | 64.00% | -48.30% | 0 |
| SRSF51             | 0.975 | 98.50% | -48.15% | 0 |
| SNHG81             | 0.892 | 94.30% | -48.13% | 0 |
| HSPA1A1            | 0.719 | 82.40% | -48.05% | 0 |
| S100B1             | 0.872 | 96.90% | -46.92% | 0 |
| PLAC91             | 0.967 | 97.10% | -44.77% | 0 |
| MYADM1             | 0.859 | 85.30% | -44.63% | 0 |
| WSB11              | 0.734 | 83.20% | -43.81% | 0 |
| HLA-C1             | 0.986 | 98.60% | -42.46% | 0 |
| SETD5-AS11         | 0.613 | 72.10% | -41.77% | 0 |
| RHOBTB31           | 0.442 | 59.80% | -41.74% | 0 |
| SERPING11          | 0.851 | 86.50% | -41.01% | 0 |
| HLA-B1             | 0.969 | 97.30% | -40.83% | 0 |
| HLA-E1             | 0.805 | 85.60% | -40.29% | 0 |
| TOB11              | 0.55  | 64.10% | -40.06% | 0 |
| METTL7A1           | 0.396 | 57.70% | -39.75% | 0 |
| EIF4A21            | 0.958 | 96.10% | -39.54% | 0 |
| EDIL31             | 0.732 | 76.60% | -39.24% | 0 |
| SRSF31             | 0.956 | 95.90% | -38.94% | 0 |
| COL11A21           | 0.671 | 78.50% | -38.82% | 0 |
| HMGB21             | 0.439 | 61.10% | -38.47% | 0 |
| CNN31              | 0.832 | 86.50% | -37.96% | 0 |
| H3F3B1             | 1     | 99.90% | -37.16% | 0 |
| VIT1               | 0.041 | 30.10% | -36.91% | 0 |
| TSPYL21            | 0.39  | 56.80% | -36.57% | 0 |
| PPP1R101           | 0.51  | 62.10% | -35.78% | 0 |
| C1S1               | 0.803 | 87.30% | -35.50% | 0 |
| SCIN1              | 0.416 | 55.80% | -34.69% | 0 |
| CIRBP1             | 0.99  | 99.10% | -34.33% | 0 |
| RBM391             | 0.907 | 91.20% | -33.00% | 0 |
| PNISR1             | 0.829 | 85.50% | -32.72% | 0 |
| AC005152.31        | 0.119 | 31.30% | -32.66% | 0 |
| RP11-<br>983P16.41 | 0.465 | 60.20% | -32.46% | 0 |
| HLA-A1             | 0.991 | 98.60% | -31.17% | 0 |
| TRA2B1             | 0.823 | 83.40% | -31.06% | 0 |
| TCEAL21            | 0.708 | 80.20% | -30.86% | 0 |
| HNRNPA2B11         | 0.975 | 97.10% | -30.34% | 0 |
| BEX41              | 0.63  | 72.70% | -30.28% | 0 |
| HSP90AB11          | 0.996 | 99.50% | -30.03% | 0 |



|                   |       |        |         |           |
|-------------------|-------|--------|---------|-----------|
| B2M1              | 1     | 99.90% | -26.72% | 0         |
| CNBP1             | 0.95  | 94.50% | -26.70% | 0         |
| GSN1              | 0.935 | 91.80% | -25.61% | 0         |
| SSR31             | 0.963 | 94.80% | -30.69% | 7.84E-301 |
| MCL11             | 0.837 | 84.80% | -33.30% | 4.46E-294 |
| PLA2G2A1          | 0.979 | 98.90% | -36.67% | 1.20E-291 |
| NAMPT1            | 0.348 | 49.40% | -35.56% | 8.41E-286 |
| NCL1              | 0.886 | 88.20% | -27.29% | 3.96E-283 |
| LAG31             | 0.411 | 53.60% | -36.34% | 1.46E-281 |
| NGFRAP11          | 0.904 | 88.00% | -26.80% | 2.51E-275 |
| CTA-29F11.11      | 0.292 | 45.70% | -30.59% | 9.35E-273 |
| BOC1              | 0.318 | 46.00% | -32.55% | 3.67E-270 |
| MAOB1             | 0.378 | 51.70% | -31.55% | 2.06E-269 |
| TIPARP1           | 0.502 | 60.80% | -39.55% | 1.29E-264 |
| ITM2A1            | 0.63  | 72.50% | -38.78% | 1.68E-263 |
| SDC21             | 0.958 | 94.70% | -29.94% | 6.98E-263 |
| EPB41L4A-<br>AS11 | 0.783 | 80.90% | -27.61% | 4.64E-259 |
| TPD52L11          | 0.756 | 77.80% | -39.67% | 4.23E-254 |
| C2orf821          | 0.892 | 97.50% | -37.74% | 1.34E-253 |
| PLA2G161          | 0.294 | 44.30% | -28.72% | 2.11E-251 |
| EPS81             | 0.532 | 62.10% | -29.70% | 6.91E-250 |
| EIF51             | 0.944 | 93.60% | -28.69% | 8.38E-240 |
| HNRNPU1           | 0.651 | 69.30% | -27.00% | 1.57E-239 |
| VASN1             | 0.666 | 70.90% | -31.42% | 2.05E-237 |
| MIA1              | 0.931 | 97.40% | -35.76% | 8.02E-236 |
| ICAM11            | 0.434 | 55.80% | -62.17% | 2.31E-235 |
| ARL6IP11          | 0.527 | 61.20% | -29.22% | 1.09E-234 |
| CRIM11            | 0.324 | 45.50% | -28.34% | 5.09E-231 |
| ELL21             | 0.485 | 58.10% | -30.88% | 1.45E-230 |
| CD141             | 0.364 | 49.50% | -39.76% | 1.15E-228 |
| CLK11             | 0.68  | 72.20% | -29.51% | 1.19E-228 |
| KCNQ10T11         | 0.538 | 63.20% | -41.20% | 2.51E-227 |
| NFATC11           | 0.495 | 58.10% | -34.69% | 8.19E-226 |
| PDCD41            | 0.446 | 54.60% | -26.26% | 1.86E-225 |
| C1orf631          | 0.598 | 66.10% | -29.67% | 5.83E-225 |
| FBLN71            | 0.194 | 34.20% | -26.35% | 6.69E-225 |
| RBMX1             | 0.792 | 79.70% | -25.41% | 7.19E-224 |
| VGLL41            | 0.632 | 68.20% | -29.26% | 3.89E-222 |
| COL9A11           | 0.142 | 30.00% | -28.60% | 5.62E-219 |
| MAFF1             | 0.201 | 34.30% | -27.66% | 6.38E-215 |
| XBP11             | 0.942 | 92.50% | -25.42% | 2.42E-213 |

|              |       |        |         |           |
|--------------|-------|--------|---------|-----------|
| ILF3-AS11    | 0.334 | 46.40% | -26.80% | 1.14E-212 |
| SLC40A11     | 0.252 | 39.40% | -35.13% | 9.82E-212 |
| PIK3R11      | 0.297 | 43.20% | -37.78% | 1.83E-209 |
| PNN1         | 0.649 | 69.10% | -25.14% | 4.74E-209 |
| PPP1R3C1     | 0.651 | 70.80% | -46.16% | 3.41E-207 |
| SQSTM11      | 0.92  | 91.00% | -30.29% | 1.64E-205 |
| SAA11        | 0.031 | 13.90% | -81.34% | 7.90E-205 |
| IFRD11       | 0.59  | 65.00% | -28.59% | 4.06E-202 |
| TXNIP1       | 0.432 | 53.30% | -43.50% | 1.18E-200 |
| HES11        | 0.421 | 53.80% | -49.32% | 1.19E-194 |
| SDF41        | 0.472 | 53.60% | -26.77% | 2.18E-188 |
| TUBB2A1      | 0.633 | 69.60% | -28.51% | 8.91E-187 |
| DNAJA11      | 0.756 | 75.60% | -30.95% | 7.33E-186 |
| GTF2B1       | 0.426 | 52.10% | -29.67% | 1.29E-183 |
| KLF21        | 0.419 | 52.30% | -31.80% | 1.97E-180 |
| PCF111       | 0.399 | 49.80% | -26.88% | 5.28E-178 |
| MTRNR2L21    | 0.39  | 49.90% | -39.62% | 5.84E-178 |
| SFPQ1        | 0.598 | 63.80% | -26.02% | 5.13E-174 |
| LIMCH11      | 0.574 | 62.00% | -25.29% | 3.95E-172 |
| ID11         | 0.658 | 70.70% | -42.80% | 7.04E-167 |
| RHOB1        | 0.757 | 77.00% | -36.23% | 1.51E-166 |
| PHLDA11      | 0.716 | 73.70% | -38.61% | 7.49E-161 |
| FABP51       | 0.227 | 34.60% | -30.72% | 5.37E-159 |
| STEAP41      | 0.044 | 14.20% | -28.54% | 5.07E-157 |
| CP1          | 0.551 | 62.50% | -37.27% | 7.15E-157 |
| ID31         | 0.688 | 72.90% | -38.71% | 3.90E-156 |
| DDIT31       | 0.72  | 74.30% | -33.97% | 9.94E-156 |
| RGS31        | 0.793 | 80.10% | -32.19% | 5.47E-154 |
| HEXIM11      | 0.505 | 56.80% | -31.25% | 2.76E-151 |
| BHLHE411     | 0.553 | 61.40% | -28.40% | 6.21E-151 |
| EIF4A31      | 0.418 | 49.80% | -26.24% | 1.91E-148 |
| GMDS1        | 0.584 | 62.40% | -25.16% | 1.66E-147 |
| EIF4A11      | 0.963 | 94.40% | -25.40% | 3.79E-146 |
| SERTAD4-AS11 | 0.629 | 63.80% | -31.49% | 7.02E-145 |
| SERPINI11    | 0.305 | 40.50% | -31.84% | 1.17E-144 |
| BRD21        | 0.701 | 71.50% | -25.20% | 7.11E-140 |
| MST41        | 0.541 | 58.20% | -29.43% | 3.28E-139 |
| MAP2K61      | 0.317 | 41.20% | -26.14% | 5.68E-132 |
| CHAD1        | 0.822 | 87.70% | -28.35% | 6.97E-130 |
| TUBB2B1      | 0.569 | 65.00% | -27.98% | 4.31E-127 |
| GADD45B1     | 0.899 | 91.90% | -41.52% | 1.07E-126 |

|           |       |        |         |           |
|-----------|-------|--------|---------|-----------|
| SNAI21    | 0.558 | 58.80% | -33.69% | 4.95E-125 |
| IRF11     | 0.456 | 52.70% | -46.77% | 3.21E-117 |
| COL9A21   | 0.67  | 68.70% | -35.80% | 1.15E-116 |
| FXVD11    | 0.759 | 71.70% | -32.36% | 4.15E-107 |
| IDI11     | 0.555 | 58.70% | -27.00% | 6.20E-106 |
| DKK11     | 0.121 | 22.00% | -30.71% | 2.84E-102 |
| GREM11    | 0.191 | 29.20% | -38.64% | 5.71E-99  |
| PRR41     | 0.239 | 32.30% | -28.92% | 1.36E-97  |
| MAFB1     | 0.236 | 32.10% | -31.10% | 2.68E-89  |
| LDLR1     | 0.348 | 41.30% | -26.18% | 3.97E-89  |
| SLC25A371 | 0.806 | 79.60% | -32.84% | 2.88E-87  |
| GLUL1     | 0.528 | 56.90% | -25.70% | 8.88E-81  |
| CST31     | 0.997 | 99.60% | -26.46% | 2.08E-79  |
| SAT11     | 0.965 | 94.50% | -25.18% | 5.68E-78  |
| BHLHE401  | 0.792 | 76.40% | -29.60% | 1.88E-76  |
| RGS161    | 0.729 | 73.60% | -53.61% | 7.85E-69  |
| NFKBIA1   | 0.867 | 87.30% | -44.38% | 1.52E-64  |
| RAMP11    | 0.224 | 28.90% | -32.11% | 1.48E-57  |
| ANKRD371  | 0.443 | 46.10% | -25.14% | 6.15E-54  |
| HMOX11    | 0.342 | 39.90% | -66.77% | 2.92E-53  |
| FGFBP21   | 0.951 | 95.50% | -37.53% | 4.20E-50  |
| EMP11     | 0.756 | 71.70% | -41.43% | 1.11E-49  |
| SCRG11    | 0.986 | 99.60% | -25.17% | 2.65E-42  |
| COL10A11  | 0.116 | 17.60% | -78.75% | 5.81E-42  |
| GOS21     | 0.159 | 21.70% | -25.61% | 3.12E-41  |
| HMGCS11   | 0.371 | 40.60% | -29.31% | 1.51E-39  |
| PDK41     | 0.219 | 27.50% | -25.45% | 2.74E-39  |
| TF1       | 0.516 | 51.80% | -55.30% | 9.42E-20  |
| RND11     | 0.185 | 21.40% | -25.79% | 4.95E-13  |
| IBSP1     | 0.133 | 16.70% | -48.68% | 5.90E-10  |
| CHI3L21   | 0.877 | 85.50% | -48.43% | 6.72E-06  |

**Supplementary Table S4.** List of differentially expressed genes in osteoarthritic chondrocytes.

| Gene     | Putative cell type of the cluster | The percentage of cells expressing the gene in the cluster | The percentage of cells expressing the gene in the other clusters | Log fold-change of the average expression between the two groups | Adjusted p-value (Bonferroni correction) |
|----------|-----------------------------------|------------------------------------------------------------|-------------------------------------------------------------------|------------------------------------------------------------------|------------------------------------------|
| MMP3     | HomC                              | 71.50%                                                     | 45.80%                                                            | 1.452                                                            | 0.00E+00                                 |
| CHI3L1   | HomC                              | 88.50%                                                     | 71.40%                                                            | 1.366                                                            | 0.00E+00                                 |
| CFH      | HomC                              | 99.40%                                                     | 91.40%                                                            | 1.249                                                            | 0.00E+00                                 |
| ZFP36    | HomC                              | 98.60%                                                     | 93.50%                                                            | 0.965                                                            | 0.00E+00                                 |
| GPX3     | HomC                              | 99.30%                                                     | 98.60%                                                            | 0.868                                                            | 0.00E+00                                 |
| PPP1R15A | HomC                              | 81.90%                                                     | 69.60%                                                            | 0.789                                                            | 0.00E+00                                 |
| GEM      | HomC                              | 86.40%                                                     | 74.40%                                                            | 0.789                                                            | 0.00E+00                                 |
| ICAM1    | HomC                              | 61.30%                                                     | 45.10%                                                            | 0.777                                                            | 0.00E+00                                 |
| SERTAD1  | HomC                              | 89.70%                                                     | 78.10%                                                            | 0.727                                                            | 0.00E+00                                 |
| FOSB     | HomC                              | 90.90%                                                     | 81.20%                                                            | 0.684                                                            | 0.00E+00                                 |
| KLF4     | HomC                              | 86.70%                                                     | 81.20%                                                            | 0.670                                                            | 0.00E+00                                 |
| JUN      | HomC                              | 95.90%                                                     | 90.00%                                                            | 0.663                                                            | 0.00E+00                                 |
| SOCS3    | HomC                              | 84.70%                                                     | 77.20%                                                            | 0.660                                                            | 0.00E+00                                 |
| RPS4Y1   | HomC                              | 59.10%                                                     | 21.40%                                                            | 0.657                                                            | 0.00E+00                                 |
| TUBB4B   | HomC                              | 88.50%                                                     | 81.80%                                                            | 0.646                                                            | 0.00E+00                                 |
| DDX5     | HomC                              | 98.80%                                                     | 98.50%                                                            | 0.642                                                            | 0.00E+00                                 |
| SLC25A37 | HomC                              | 85.10%                                                     | 77.60%                                                            | 0.628                                                            | 0.00E+00                                 |
| SNHG8    | HomC                              | 96.00%                                                     | 90.20%                                                            | 0.618                                                            | 0.00E+00                                 |
| CCNL1    | HomC                              | 91.30%                                                     | 83.90%                                                            | 0.614                                                            | 0.00E+00                                 |
| TSC22D1  | HomC                              | 99.00%                                                     | 96.00%                                                            | 0.612                                                            | 0.00E+00                                 |
| BTG1     | HomC                              | 94.90%                                                     | 90.40%                                                            | 0.610                                                            | 0.00E+00                                 |
| MALAT1   | HomC                              | 100.00%                                                    | 100.00%                                                           | 0.610                                                            | 0.00E+00                                 |
| HSPA1B   | HomC                              | 74.60%                                                     | 62.10%                                                            | 0.602                                                            | 0.00E+00                                 |
| UBC      | HomC                              | 99.90%                                                     | 99.60%                                                            | 0.596                                                            | 0.00E+00                                 |
| SOD3     | HomC                              | 92.30%                                                     | 91.00%                                                            | 0.556                                                            | 0.00E+00                                 |
| MIR24-2  | HomC                              | 76.50%                                                     | 63.00%                                                            | 0.552                                                            | 0.00E+00                                 |
| CDKN1A   | HomC                              | 88.70%                                                     | 79.80%                                                            | 0.513                                                            | 0.00E+00                                 |
| CSRNP1   | HomC                              | 77.80%                                                     | 65.00%                                                            | 0.504                                                            | 0.00E+00                                 |
| JUNB     | HomC                              | 99.70%                                                     | 98.90%                                                            | 0.502                                                            | 0.00E+00                                 |
| SRSF3    | HomC                              | 96.70%                                                     | 95.30%                                                            | 0.500                                                            | 0.00E+00                                 |
| DDIT3    | HomC                              | 77.00%                                                     | 71.50%                                                            | 0.480                                                            | 0.00E+00                                 |

|           |      |         |         |       |           |
|-----------|------|---------|---------|-------|-----------|
| NNMT      | HomC | 97.60%  | 94.90%  | 0.476 | 0.00E+00  |
| EIF4A1    | HomC | 95.60%  | 95.10%  | 0.471 | 0.00E+00  |
| SRSF5     | HomC | 98.80%  | 97.70%  | 0.458 | 0.00E+00  |
| PLA2G2A   | HomC | 99.30%  | 98.10%  | 0.452 | 0.00E+00  |
| DNAJB1    | HomC | 79.20%  | 72.70%  | 0.449 | 0.00E+00  |
| SRSF7     | HomC | 86.90%  | 83.90%  | 0.448 | 0.00E+00  |
| EIF5      | HomC | 94.20%  | 93.90%  | 0.442 | 0.00E+00  |
| PNRC1     | HomC | 78.70%  | 74.10%  | 0.433 | 0.00E+00  |
| HMGB2     | HomC | 63.40%  | 48.70%  | 0.426 | 0.00E+00  |
| DDX3Y     | HomC | 38.30%  | 13.70%  | 0.420 | 0.00E+00  |
| EIF4A2    | HomC | 96.50%  | 95.70%  | 0.420 | 0.00E+00  |
| CNN3      | HomC | 86.90%  | 84.10%  | 0.411 | 0.00E+00  |
| SQSTM1    | HomC | 91.00%  | 91.70%  | 0.407 | 0.00E+00  |
| IFITM2    | HomC | 85.30%  | 80.90%  | 0.407 | 0.00E+00  |
| SETD5-AS1 | HomC | 72.90%  | 64.60%  | 0.398 | 0.00E+00  |
| CIRBP     | HomC | 99.30%  | 98.90%  | 0.385 | 0.00E+00  |
| HLA-E     | HomC | 85.10%  | 82.40%  | 0.374 | 0.00E+00  |
| C4BPA     | HomC | 24.90%  | 3.40%   | 0.371 | 0.00E+00  |
| WSB1      | HomC | 81.90%  | 77.40%  | 0.364 | 0.00E+00  |
| PLA2G16   | HomC | 49.00%  | 32.20%  | 0.354 | 0.00E+00  |
| EIF1      | HomC | 100.00% | 100.00% | 0.353 | 0.00E+00  |
| RBM39     | HomC | 91.00%  | 91.00%  | 0.338 | 0.00E+00  |
| H3F3B     | HomC | 99.90%  | 100.00% | 0.336 | 0.00E+00  |
| C1S       | HomC | 87.50%  | 82.60%  | 0.333 | 0.00E+00  |
| XBP1      | HomC | 92.50%  | 93.60%  | 0.322 | 0.00E+00  |
| FRZB      | HomC | 97.80%  | 72.40%  | 0.312 | 0.00E+00  |
| HNRNPA2B1 | HomC | 96.50%  | 97.60%  | 0.310 | 0.00E+00  |
| ZFAS1     | HomC | 97.20%  | 97.40%  | 0.292 | 0.00E+00  |
| HSP90AB1  | HomC | 99.50%  | 99.60%  | 0.288 | 0.00E+00  |
| CNBP      | HomC | 94.10%  | 95.00%  | 0.272 | 0.00E+00  |
| HNRNPA1   | HomC | 99.60%  | 99.60%  | 0.266 | 0.00E+00  |
| SAA1      | HomC | 18.40%  | 4.60%   | 1.070 | 4.53E-303 |
| HNRNPDL   | HomC | 90.10%  | 91.50%  | 0.285 | 1.05E-302 |
| DDIT4     | HomC | 61.50%  | 45.80%  | 0.707 | 4.00E-301 |
| NDRG2     | HomC | 73.60%  | 63.30%  | 0.338 | 6.68E-298 |
| ADM       | HomC | 58.40%  | 41.70%  | 0.456 | 9.47E-293 |
| HSP90AA1  | HomC | 98.10%  | 98.50%  | 0.305 | 2.51E-286 |
| SRSF2     | HomC | 83.60%  | 84.10%  | 0.331 | 1.41E-283 |
| ADIRF     | HomC | 93.50%  | 91.00%  | 0.346 | 9.06E-282 |
| C1orf63   | HomC | 67.70%  | 61.10%  | 0.359 | 7.65E-281 |
| SBDS      | HomC | 87.60%  | 88.80%  | 0.310 | 2.22E-280 |

|              |      |         |         |       |           |
|--------------|------|---------|---------|-------|-----------|
| HSPA1A       | HomC | 83.00%  | 75.30%  | 0.576 | 1.60E-277 |
| CD14         | HomC | 53.30%  | 39.10%  | 0.467 | 2.89E-277 |
| FUS          | HomC | 89.40%  | 90.60%  | 0.302 | 6.03E-273 |
| SERPING1     | HomC | 84.70%  | 86.40%  | 0.385 | 1.76E-270 |
| IFITM1       | HomC | 37.60%  | 21.10%  | 0.290 | 1.00E-267 |
| CLK1         | HomC | 72.90%  | 69.10%  | 0.333 | 7.48E-263 |
| GBP2         | HomC | 55.20%  | 41.50%  | 0.366 | 1.99E-262 |
| MT1X         | HomC | 99.50%  | 99.20%  | 0.365 | 8.82E-262 |
| NCL          | HomC | 87.60%  | 88.80%  | 0.292 | 9.47E-259 |
| HMOX1        | HomC | 48.10%  | 32.20%  | 0.979 | 2.62E-258 |
| ATF3         | HomC | 66.60%  | 52.70%  | 0.423 | 7.49E-256 |
| RBMX         | HomC | 79.40%  | 79.60%  | 0.295 | 5.05E-255 |
| HEXIM1       | HomC | 59.70%  | 51.20%  | 0.414 | 5.72E-255 |
| PPP1R10      | HomC | 62.80%  | 54.50%  | 0.355 | 2.61E-253 |
| FOS          | HomC | 99.00%  | 96.90%  | 0.524 | 1.38E-250 |
| HMG2         | HomC | 87.60%  | 88.70%  | 0.265 | 8.80E-248 |
| RSL24D1      | HomC | 86.40%  | 87.70%  | 0.266 | 8.99E-248 |
| GADD45B      | HomC | 93.10%  | 90.00%  | 0.591 | 1.70E-244 |
| HSPD1        | HomC | 80.90%  | 81.90%  | 0.289 | 3.73E-240 |
| RARRES2      | HomC | 46.90%  | 29.30%  | 0.397 | 5.49E-238 |
| SSR3         | HomC | 94.30%  | 96.00%  | 0.280 | 1.71E-237 |
| MTRNR2L2     | HomC | 53.70%  | 40.90%  | 0.450 | 7.08E-237 |
| KLF10        | HomC | 64.10%  | 54.90%  | 0.397 | 3.65E-233 |
| MAFB         | HomC | 38.90%  | 23.30%  | 0.430 | 1.94E-231 |
| MGP          | HomC | 100.00% | 100.00% | 0.273 | 2.75E-229 |
| GDF10        | HomC | 71.50%  | 57.50%  | 0.387 | 1.63E-227 |
| STEAP4       | HomC | 18.20%  | 5.90%   | 0.360 | 1.38E-224 |
| GTF2B        | HomC | 54.40%  | 44.70%  | 0.347 | 6.21E-219 |
| SLC14A1      | HomC | 51.90%  | 35.00%  | 0.350 | 1.10E-217 |
| MYADM        | HomC | 83.40%  | 86.60%  | 0.419 | 1.24E-216 |
| TSPYL2       | HomC | 56.20%  | 45.50%  | 0.308 | 3.89E-214 |
| DNAJA1       | HomC | 75.30%  | 75.70%  | 0.363 | 6.28E-213 |
| IFRD1        | HomC | 65.60%  | 60.70%  | 0.321 | 7.12E-212 |
| MAFF         | HomC | 37.40%  | 23.50%  | 0.303 | 3.65E-207 |
| JUND         | HomC | 78.90%  | 78.00%  | 0.353 | 6.64E-205 |
| PNISR        | HomC | 83.70%  | 84.60%  | 0.254 | 1.10E-202 |
| EPB41L4A-AS1 | HomC | 80.00%  | 79.60%  | 0.264 | 4.59E-202 |
| ARL6IP1      | HomC | 61.40%  | 55.60%  | 0.310 | 5.01E-201 |
| IRF1         | HomC | 56.60%  | 46.20%  | 0.579 | 2.23E-194 |
| HERPUD1      | HomC | 90.10%  | 92.40%  | 0.303 | 9.65E-193 |
| TIPARP       | HomC | 61.40%  | 53.50%  | 0.376 | 5.16E-192 |

|          |      |        |        |       |           |
|----------|------|--------|--------|-------|-----------|
| LAG3     | HomC | 54.40% | 45.10% | 0.312 | 6.27E-192 |
| SLC3A2   | HomC | 58.70% | 52.90% | 0.345 | 2.95E-191 |
| CHI3L2   | HomC | 90.10% | 84.70% | 0.601 | 6.88E-188 |
| IER2     | HomC | 88.20% | 85.10% | 0.332 | 8.48E-187 |
| TRA2B    | HomC | 81.80% | 83.50% | 0.263 | 1.42E-186 |
| BRD2     | HomC | 71.90% | 70.40% | 0.310 | 8.91E-184 |
| H2AFX    | HomC | 39.80% | 28.20% | 0.323 | 5.35E-178 |
| PCF11    | HomC | 51.40% | 42.50% | 0.296 | 1.47E-177 |
| NR4A2    | HomC | 65.40% | 58.80% | 0.364 | 1.61E-176 |
| HNRNPF   | HomC | 66.90% | 65.80% | 0.267 | 1.23E-175 |
| OSMR     | HomC | 60.90% | 56.50% | 0.362 | 1.75E-170 |
| MAOB     | HomC | 51.80% | 42.60% | 0.298 | 2.21E-170 |
| HSPA8    | HomC | 89.00% | 91.50% | 0.341 | 4.27E-166 |
| SLC40A1  | HomC | 41.00% | 29.40% | 0.348 | 7.80E-158 |
| MT2A     | HomC | 99.80% | 99.70% | 0.315 | 3.38E-156 |
| RGS3     | HomC | 79.90% | 79.70% | 0.342 | 1.03E-153 |
| RSRC2    | HomC | 74.80% | 76.50% | 0.255 | 3.96E-153 |
| MT1E     | HomC | 99.00% | 98.90% | 0.335 | 4.08E-151 |
| BAG3     | HomC | 58.40% | 54.20% | 0.295 | 4.94E-149 |
| PIK3R1   | HomC | 43.70% | 34.10% | 0.413 | 4.82E-148 |
| NAMPT    | HomC | 48.40% | 40.30% | 0.319 | 3.27E-144 |
| SFPQ     | HomC | 62.80% | 61.70% | 0.268 | 5.96E-143 |
| CP       | HomC | 63.00% | 57.40% | 0.421 | 1.53E-139 |
| ERRFI1   | HomC | 78.20% | 76.50% | 0.509 | 2.13E-137 |
| MAP2K6   | HomC | 43.80% | 33.70% | 0.259 | 4.64E-136 |
| PLSCR1   | HomC | 42.00% | 33.60% | 0.287 | 5.73E-135 |
| LBH      | HomC | 51.60% | 45.30% | 0.365 | 1.66E-133 |
| EGR1     | HomC | 92.30% | 90.30% | 0.261 | 2.26E-133 |
| TXNIP    | HomC | 52.80% | 46.90% | 0.428 | 2.15E-131 |
| RGS16    | HomC | 75.70% | 72.20% | 0.729 | 5.27E-131 |
| TUBB2A   | HomC | 68.60% | 66.00% | 0.285 | 1.11E-130 |
| ELL2     | HomC | 56.60% | 52.50% | 0.283 | 3.22E-130 |
| COL12A1  | HomC | 42.90% | 32.80% | 0.280 | 3.85E-128 |
| MIR22HG  | HomC | 54.00% | 50.70% | 0.306 | 1.26E-126 |
| PHLDA1   | HomC | 73.30% | 72.50% | 0.370 | 1.51E-126 |
| RASD1    | HomC | 69.50% | 59.40% | 0.298 | 1.34E-121 |
| JMJD6    | HomC | 52.50% | 48.00% | 0.262 | 1.26E-119 |
| NFKBIA   | HomC | 87.90% | 86.60% | 0.607 | 7.46E-119 |
| AMD1     | HomC | 59.20% | 58.30% | 0.267 | 1.56E-112 |
| BTG2     | HomC | 74.80% | 70.10% | 0.280 | 3.81E-112 |
| SERPINB1 | HomC | 54.80% | 52.30% | 0.293 | 5.63E-112 |

|           |      |        |        |       |           |
|-----------|------|--------|--------|-------|-----------|
| TOB1      | HomC | 61.60% | 59.30% | 0.268 | 8.94E-111 |
| MTRNR2L8  | HomC | 33.70% | 24.70% | 0.251 | 2.99E-108 |
| ARID5A    | HomC | 49.10% | 43.60% | 0.286 | 7.51E-108 |
| EIF4A3    | HomC | 49.40% | 44.70% | 0.250 | 4.23E-106 |
| METTL7A   | HomC | 54.40% | 47.40% | 0.251 | 3.41E-103 |
| MTRNR2L12 | HomC | 39.70% | 32.50% | 0.255 | 1.75E-99  |
| HNRNPH1   | HomC | 63.50% | 63.90% | 0.254 | 6.42E-94  |
| TUBB2B    | HomC | 64.60% | 59.90% | 0.286 | 7.21E-94  |
| NR4A1     | HomC | 62.70% | 55.80% | 0.294 | 4.28E-93  |
| STC2      | HomC | 49.10% | 39.20% | 0.295 | 4.61E-93  |
| MEG3      | HomC | 56.80% | 48.00% | 0.318 | 6.60E-90  |
| APOD      | HomC | 79.10% | 72.30% | 0.327 | 1.94E-89  |
| ID3       | HomC | 73.30% | 70.00% | 0.310 | 5.15E-89  |
| SOD2      | HomC | 83.60% | 84.80% | 0.522 | 7.33E-86  |
| BAZ1A     | HomC | 41.00% | 35.70% | 0.256 | 1.97E-84  |
| SNAPC1    | HomC | 55.50% | 54.60% | 0.259 | 2.46E-80  |
| MYC       | HomC | 35.40% | 28.20% | 0.440 | 6.18E-77  |
| KIAA0040  | HomC | 62.60% | 64.60% | 0.296 | 1.98E-76  |
| WTAP      | HomC | 62.00% | 64.30% | 0.313 | 4.24E-76  |
| GLUL      | HomC | 56.30% | 54.50% | 0.312 | 2.93E-75  |
| TF        | HomC | 55.70% | 49.80% | 0.290 | 1.33E-70  |
| ID1       | HomC | 69.90% | 67.90% | 0.320 | 5.64E-70  |
| KCNQ1OT1  | HomC | 59.70% | 58.70% | 0.325 | 7.98E-70  |
| SAT1      | HomC | 93.90% | 96.10% | 0.277 | 1.11E-69  |
| RND1      | HomC | 25.10% | 17.70% | 0.407 | 3.74E-66  |
| MT1M      | HomC | 80.80% | 81.50% | 0.397 | 5.37E-62  |
| PDK4      | HomC | 28.80% | 23.20% | 0.325 | 3.28E-41  |
| BHLHE40   | HomC | 73.60% | 79.60% | 0.276 | 2.31E-28  |
| EMP1      | HomC | 68.20% | 75.90% | 0.496 | 6.24E-27  |
| C10orf10  | HomC | 26.90% | 23.50% | 0.255 | 2.39E-23  |
| MT1A      | HomC | 40.30% | 40.70% | 0.334 | 1.45E-20  |
| CCL2      | HomC | 23.50% | 19.60% | 0.529 | 2.06E-19  |
| HILPDA    | HomC | 33.80% | 32.90% | 0.289 | 1.69E-15  |
| G0S2      | HomC | 21.00% | 18.20% | 0.336 | 2.28E-12  |
| HSPA6     | HomC | 10.40% | 7.70%  | 0.261 | 1.33E-10  |
| IER3      | HomC | 84.40% | 86.90% | 0.346 | 4.36E-01  |
| COL10A1   | HTC  | 39.80% | 12.20% | 1.404 | 0.00E+00  |
| CHRD2     | HTC  | 78.00% | 19.00% | 1.399 | 0.00E+00  |
| FRZB      | HTC  | 99.90% | 78.50% | 1.369 | 0.00E+00  |
| CRISPLD1  | HTC  | 96.50% | 43.90% | 1.359 | 0.00E+00  |
| IBSP      | HTC  | 29.50% | 13.60% | 1.186 | 9.70E-114 |



|          |     |         |        |       |           |
|----------|-----|---------|--------|-------|-----------|
| TF       | HTC | 73.80%  | 49.30% | 1.088 | 4.40E-228 |
| FGFBP2   | HTC | 100.00% | 94.80% | 1.025 | 0.00E+00  |
| IER2     | HTC | 97.70%  | 84.90% | 1.001 | 0.00E+00  |
| PDPN     | HTC | 95.00%  | 73.50% | 0.952 | 0.00E+00  |
| HAPLN1   | HTC | 100.00% | 94.10% | 0.910 | 0.00E+00  |
| RBP4     | HTC | 94.40%  | 67.10% | 0.894 | 0.00E+00  |
| STC2     | HTC | 76.80%  | 38.60% | 0.871 | 0.00E+00  |
| RASD1    | HTC | 88.80%  | 59.80% | 0.870 | 0.00E+00  |
| JUN      | HTC | 98.80%  | 91.20% | 0.866 | 0.00E+00  |
| CYTL1    | HTC | 99.60%  | 86.50% | 0.861 | 0.00E+00  |
| C2orf82  | HTC | 100.00% | 93.10% | 0.861 | 0.00E+00  |
| SLPI     | HTC | 50.60%  | 18.60% | 0.852 | 0.00E+00  |
| JUNB     | HTC | 100.00% | 99.10% | 0.845 | 0.00E+00  |
| APOD     | HTC | 93.90%  | 72.40% | 0.817 | 0.00E+00  |
| SCRG1    | HTC | 100.00% | 99.10% | 0.805 | 0.00E+00  |
| FOS      | HTC | 100.00% | 97.40% | 0.796 | 0.00E+00  |
| NR4A1    | HTC | 85.50%  | 55.00% | 0.749 | 0.00E+00  |
| RAMP1    | HTC | 61.60%  | 22.10% | 0.744 | 0.00E+00  |
| SPINT2   | HTC | 99.90%  | 88.40% | 0.743 | 0.00E+00  |
| ATF3     | HTC | 83.00%  | 54.30% | 0.743 | 0.00E+00  |
| CST3     | HTC | 99.90%  | 99.60% | 0.741 | 0.00E+00  |
| BTG2     | HTC | 89.70%  | 69.60% | 0.737 | 0.00E+00  |
| DKK1     | HTC | 49.50%  | 14.10% | 0.734 | 0.00E+00  |
| PLAC9    | HTC | 99.80%  | 96.60% | 0.718 | 0.00E+00  |
| CHAD     | HTC | 99.80%  | 83.60% | 0.717 | 0.00E+00  |
| FXYP1    | HTC | 95.00%  | 71.20% | 0.708 | 0.00E+00  |
| SERPINA5 | HTC | 98.00%  | 82.10% | 0.699 | 0.00E+00  |
| EGR1     | HTC | 98.70%  | 90.10% | 0.689 | 0.00E+00  |
| MIA      | HTC | 100.00% | 95.00% | 0.688 | 0.00E+00  |
| FOSB     | HTC | 98.00%  | 82.80% | 0.668 | 0.00E+00  |
| TSPAN13  | HTC | 65.10%  | 30.00% | 0.655 | 0.00E+00  |
| SERPINA1 | HTC | 100.00% | 95.70% | 0.652 | 0.00E+00  |
| MEG3     | HTC | 82.20%  | 47.40% | 0.643 | 0.00E+00  |
| ACAN     | HTC | 100.00% | 96.00% | 0.637 | 0.00E+00  |
| S100B    | HTC | 99.90%  | 91.80% | 0.634 | 0.00E+00  |
| LECT1    | HTC | 73.00%  | 44.20% | 0.628 | 1.82E-242 |
| WWP2     | HTC | 97.50%  | 80.60% | 0.620 | 0.00E+00  |
| PPP1R3C  | HTC | 88.20%  | 66.10% | 0.593 | 5.22E-276 |
| ACTG1    | HTC | 100.00% | 99.30% | 0.578 | 0.00E+00  |
| IGFBP6   | HTC | 82.70%  | 67.80% | 0.557 | 8.28E-129 |
| SLC14A1  | HTC | 77.90%  | 36.40% | 0.552 | 0.00E+00  |

|            |     |         |        |       |           |
|------------|-----|---------|--------|-------|-----------|
| HES1       | HTC | 70.60%  | 46.20% | 0.539 | 1.31E-185 |
| SRSF7      | HTC | 94.70%  | 83.80% | 0.539 | 1.65E-279 |
| ITM2A      | HTC | 93.80%  | 65.50% | 0.537 | 0.00E+00  |
| GDF10      | HTC | 89.60%  | 59.00% | 0.533 | 2.22E-292 |
| SERPINI1   | HTC | 65.60%  | 32.90% | 0.532 | 0.00E+00  |
| S100A1     | HTC | 100.00% | 87.70% | 0.523 | 0.00E+00  |
| SPTSSB     | HTC | 46.90%  | 15.30% | 0.517 | 0.00E+00  |
| HMGCS1     | HTC | 56.80%  | 37.10% | 0.516 | 1.19E-120 |
| TTLL7      | HTC | 73.50%  | 33.20% | 0.514 | 0.00E+00  |
| TPD52L1    | HTC | 89.60%  | 75.40% | 0.511 | 9.19E-227 |
| NDRG2      | HTC | 91.80%  | 63.90% | 0.511 | 0.00E+00  |
| DUSP1      | HTC | 91.80%  | 74.60% | 0.510 | 2.72E-228 |
| MDFI       | HTC | 93.10%  | 66.70% | 0.507 | 0.00E+00  |
| ACTB       | HTC | 100.00% | 99.60% | 0.505 | 0.00E+00  |
| PHOSPHO1   | HTC | 57.30%  | 16.20% | 0.503 | 0.00E+00  |
| COL9A2     | HTC | 95.00%  | 64.90% | 0.489 | 0.00E+00  |
| FCGRT      | HTC | 94.10%  | 76.40% | 0.481 | 0.00E+00  |
| MFGE8      | HTC | 98.10%  | 93.30% | 0.473 | 2.35E-207 |
| IDI1       | HTC | 78.60%  | 54.90% | 0.466 | 2.58E-222 |
| EDIL3      | HTC | 91.00%  | 73.30% | 0.457 | 1.40E-271 |
| MRPS6      | HTC | 89.80%  | 65.40% | 0.457 | 0.00E+00  |
| LDLR       | HTC | 64.60%  | 35.50% | 0.455 | 7.54E-255 |
| KCNMA1     | HTC | 82.80%  | 62.60% | 0.451 | 1.49E-176 |
| COL9A3     | HTC | 99.80%  | 87.60% | 0.450 | 9.12E-281 |
| TPM4       | HTC | 80.80%  | 61.40% | 0.448 | 7.26E-207 |
| CRYAB      | HTC | 92.10%  | 80.10% | 0.446 | 4.65E-130 |
| SCIN       | HTC | 79.60%  | 46.20% | 0.446 | 0.00E+00  |
| MST4       | HTC | 84.40%  | 53.30% | 0.446 | 0.00E+00  |
| AC005152.3 | HTC | 52.70%  | 19.40% | 0.445 | 0.00E+00  |
| ITM2C      | HTC | 99.80%  | 92.60% | 0.443 | 0.00E+00  |
| RHOB       | HTC | 89.20%  | 75.00% | 0.442 | 1.37E-149 |
| BHLHE41    | HTC | 83.20%  | 56.00% | 0.436 | 9.22E-262 |
| CLEC3A     | HTC | 98.20%  | 70.30% | 0.431 | 1.83E-281 |
| SNAI2      | HTC | 75.70%  | 55.40% | 0.427 | 1.02E-170 |
| INSIG1     | HTC | 67.20%  | 46.50% | 0.424 | 2.58E-130 |
| MIR24-2    | HTC | 87.30%  | 65.20% | 0.421 | 2.19E-190 |
| HSPB1      | HTC | 97.50%  | 93.90% | 0.418 | 5.43E-111 |
| BHLHE40    | HTC | 88.30%  | 76.50% | 0.410 | 3.97E-141 |
| NR4A2      | HTC | 79.80%  | 58.80% | 0.407 | 7.09E-165 |
| FOXA3      | HTC | 68.70%  | 38.50% | 0.405 | 3.10E-249 |
| VIT        | HTC | 47.60%  | 15.40% | 0.405 | 0.00E+00  |

|         |     |        |        |       |           |
|---------|-----|--------|--------|-------|-----------|
| WIF1    | HTC | 45.30% | 21.00% | 0.402 | 1.16E-177 |
| CPE     | HTC | 56.60% | 32.20% | 0.401 | 3.48E-176 |
| MEF2C   | HTC | 67.10% | 39.70% | 0.400 | 4.35E-221 |
| NGFRAP1 | HTC | 97.90% | 88.10% | 0.398 | 0.00E+00  |
| SDC2    | HTC | 99.30% | 94.70% | 0.397 | 1.54E-246 |
| PLD3    | HTC | 97.20% | 87.30% | 0.393 | 0.00E+00  |
| GREM1   | HTC | 44.20% | 22.60% | 0.392 | 4.82E-132 |
| SERTAD4 | HTC | 65.10% | 41.20% | 0.390 | 8.30E-177 |
| MCL1    | HTC | 94.60% | 83.20% | 0.388 | 1.42E-218 |
| CD99    | HTC | 99.70% | 96.70% | 0.386 | 3.53E-294 |
| KLF10   | HTC | 76.50% | 55.80% | 0.386 | 4.43E-161 |
| METTL7A | HTC | 76.40% | 46.70% | 0.385 | 1.50E-236 |
| ADM     | HTC | 68.10% | 44.80% | 0.381 | 4.31E-134 |
| TMEM59  | HTC | 99.80% | 98.00% | 0.381 | 0.00E+00  |
| AP3S1   | HTC | 96.20% | 84.50% | 0.381 | 3.00E-250 |
| AGR2    | HTC | 18.40% | 4.10%  | 0.380 | 5.89E-200 |
| ZFP36   | HTC | 99.60% | 94.70% | 0.377 | 7.09E-202 |
| TOB1    | HTC | 78.80% | 58.00% | 0.377 | 1.48E-185 |
| TUBB2B  | HTC | 81.70% | 59.20% | 0.371 | 2.15E-151 |
| TIMP4   | HTC | 80.40% | 62.30% | 0.368 | 6.89E-155 |
| GSN     | HTC | 98.90% | 91.90% | 0.366 | 1.18E-301 |
| MSMO1   | HTC | 56.20% | 34.80% | 0.365 | 1.61E-133 |
| NUCB2   | HTC | 98.90% | 89.00% | 0.365 | 1.15E-229 |
| FBXO2   | HTC | 98.40% | 85.00% | 0.363 | 9.01E-265 |
| CHID1   | HTC | 86.80% | 65.80% | 0.356 | 9.30E-248 |
| SSR4    | HTC | 99.60% | 96.40% | 0.356 | 4.15E-231 |
| COL11A2 | HTC | 96.00% | 70.90% | 0.354 | 1.67E-250 |
| HLA-A   | HTC | 99.80% | 98.70% | 0.352 | 7.07E-257 |
| SOD3    | HTC | 94.20% | 91.10% | 0.352 | 4.06E-72  |
| PRDX4   | HTC | 98.30% | 90.60% | 0.351 | 3.69E-206 |
| SLC29A1 | HTC | 88.50% | 77.50% | 0.346 | 7.14E-103 |
| NEU1    | HTC | 61.30% | 44.00% | 0.340 | 2.70E-102 |
| PDE4DIP | HTC | 84.00% | 64.50% | 0.340 | 4.26E-206 |
| CD59    | HTC | 99.00% | 93.20% | 0.337 | 2.00E-222 |
| CYR61   | HTC | 96.00% | 93.00% | 0.336 | 7.78E-58  |
| ADRB2   | HTC | 60.30% | 37.50% | 0.336 | 3.12E-146 |
| GPC6    | HTC | 89.20% | 70.40% | 0.333 | 2.75E-200 |
| WISP3   | HTC | 81.90% | 61.50% | 0.332 | 5.35E-164 |
| CDKN1A  | HTC | 90.90% | 81.80% | 0.332 | 1.30E-129 |
| SPOCK3  | HTC | 21.90% | 3.10%  | 0.330 | 0.00E+00  |
| NFATC1  | HTC | 72.80% | 52.20% | 0.328 | 3.16E-145 |

|             |     |         |         |       |           |
|-------------|-----|---------|---------|-------|-----------|
| PEBP1       | HTC | 99.20%  | 95.50%  | 0.328 | 9.14E-277 |
| EGR3        | HTC | 42.70%  | 22.70%  | 0.328 | 2.59E-131 |
| CD83        | HTC | 33.60%  | 13.70%  | 0.325 | 8.44E-165 |
| CYSTM1      | HTC | 78.10%  | 62.10%  | 0.324 | 3.59E-132 |
| CD9         | HTC | 99.30%  | 94.50%  | 0.323 | 3.03E-228 |
| HLA-C       | HTC | 99.90%  | 98.50%  | 0.322 | 2.37E-249 |
| CTH         | HTC | 41.80%  | 16.20%  | 0.321 | 2.35E-240 |
| LDLRAD4     | HTC | 76.90%  | 58.30%  | 0.319 | 1.65E-126 |
| H3F3B       | HTC | 100.00% | 100.00% | 0.319 | 1.21E-170 |
| ANKRD37     | HTC | 59.10%  | 43.80%  | 0.319 | 2.33E-79  |
| TSPAN3      | HTC | 82.20%  | 61.20%  | 0.319 | 6.74E-194 |
| EXTL1       | HTC | 49.70%  | 19.40%  | 0.315 | 3.68E-293 |
| HEXB        | HTC | 82.00%  | 66.80%  | 0.315 | 1.24E-146 |
| CFH         | HTC | 99.20%  | 93.40%  | 0.314 | 1.88E-156 |
| FGFR1       | HTC | 82.60%  | 68.40%  | 0.313 | 2.12E-97  |
| JUND        | HTC | 90.70%  | 76.90%  | 0.307 | 2.32E-142 |
| SOX9        | HTC | 86.90%  | 69.00%  | 0.307 | 3.91E-125 |
| GEM         | HTC | 90.50%  | 76.90%  | 0.304 | 2.50E-125 |
| LGI4        | HTC | 46.30%  | 18.30%  | 0.304 | 1.60E-248 |
| NR1D1       | HTC | 81.70%  | 65.40%  | 0.303 | 8.20E-105 |
| FXVD6       | HTC | 97.30%  | 85.30%  | 0.303 | 4.15E-148 |
| DLX5        | HTC | 64.20%  | 45.90%  | 0.302 | 8.42E-97  |
| TSPAN6      | HTC | 90.00%  | 68.90%  | 0.299 | 2.26E-177 |
| ZNF385B     | HTC | 51.80%  | 19.90%  | 0.296 | 0.00E+00  |
| CTA-29F11.1 | HTC | 60.90%  | 35.90%  | 0.295 | 5.27E-157 |
| SLC44A2     | HTC | 65.80%  | 41.80%  | 0.295 | 5.55E-167 |
| TUBA1A      | HTC | 65.90%  | 59.90%  | 0.293 | 5.00E-23  |
| DDIT4       | HTC | 68.80%  | 48.90%  | 0.292 | 1.33E-99  |
| GLIPR1      | HTC | 81.50%  | 61.40%  | 0.287 | 1.53E-128 |
| CYB5D2      | HTC | 69.80%  | 43.70%  | 0.286 | 5.24E-195 |
| AQPEP       | HTC | 43.00%  | 16.00%  | 0.284 | 2.80E-273 |
| RCN3        | HTC | 94.00%  | 84.80%  | 0.282 | 3.49E-134 |
| HSPB6       | HTC | 60.00%  | 39.10%  | 0.281 | 3.65E-127 |
| MFI2        | HTC | 74.60%  | 53.00%  | 0.276 | 7.20E-139 |
| SERTAD4-AS1 | HTC | 77.30%  | 61.90%  | 0.276 | 5.92E-93  |
| TMED10      | HTC | 98.20%  | 89.80%  | 0.275 | 4.61E-171 |
| VGLL4       | HTC | 80.60%  | 64.40%  | 0.274 | 1.49E-119 |
| CNN2        | HTC | 54.30%  | 28.60%  | 0.274 | 1.79E-181 |
| TSPYL2      | HTC | 69.90%  | 46.70%  | 0.272 | 3.44E-148 |
| RHOBTB3     | HTC | 69.80%  | 51.00%  | 0.268 | 2.93E-107 |
| DAP         | HTC | 83.50%  | 66.40%  | 0.267 | 1.19E-139 |

|               |        |         |        |       |           |
|---------------|--------|---------|--------|-------|-----------|
| ARL4D         | HTC    | 42.60%  | 26.00% | 0.267 | 1.99E-83  |
| PHLDA1        | HTC    | 80.10%  | 71.90% | 0.267 | 1.86E-47  |
| BOC           | HTC    | 58.70%  | 37.60% | 0.266 | 2.31E-127 |
| RARRES2       | HTC    | 50.10%  | 33.40% | 0.266 | 2.15E-66  |
| RP11-983P16.4 | HTC    | 74.20%  | 52.00% | 0.266 | 4.96E-145 |
| CSRP1         | HTC    | 79.50%  | 64.00% | 0.265 | 1.31E-120 |
| TMED4         | HTC    | 83.70%  | 67.20% | 0.261 | 3.25E-142 |
| GABARAPL1     | HTC    | 72.20%  | 57.40% | 0.258 | 1.36E-90  |
| B2M           | HTC    | 100.00% | 99.90% | 0.257 | 1.71E-239 |
| LRPAP1        | HTC    | 89.90%  | 79.10% | 0.257 | 6.16E-100 |
| STK38L        | HTC    | 79.90%  | 64.90% | 0.256 | 3.09E-79  |
| ATRAID        | HTC    | 95.90%  | 89.10% | 0.256 | 5.03E-129 |
| PRPSAP1       | HTC    | 63.30%  | 38.50% | 0.256 | 3.49E-163 |
| RPN2          | HTC    | 91.30%  | 80.20% | 0.256 | 1.14E-103 |
| PDLIM5        | HTC    | 80.60%  | 63.60% | 0.254 | 1.03E-128 |
| SCPEP1        | HTC    | 71.70%  | 54.40% | 0.253 | 8.65E-117 |
| CD320         | HTC    | 70.70%  | 51.80% | 0.253 | 2.62E-122 |
| A2M           | HTC    | 58.60%  | 37.20% | 0.251 | 2.64E-108 |
| WSB1          | HTC    | 91.90%  | 77.40% | 0.250 | 8.65E-149 |
| CLEC3A        | PreHTC | 98.90%  | 70.30% | 1.001 | 0.00E+00  |
| C2orf82       | PreHTC | 100.00% | 93.10% | 0.993 | 0.00E+00  |
| CHRD12        | PreHTC | 65.70%  | 20.60% | 0.969 | 0.00E+00  |
| FGFBP2        | PreHTC | 100.00% | 94.80% | 0.955 | 0.00E+00  |
| CRISPLD1      | PreHTC | 90.20%  | 44.80% | 0.918 | 0.00E+00  |
| SCRG1         | PreHTC | 100.00% | 99.10% | 0.860 | 0.00E+00  |
| CYTL1         | PreHTC | 99.40%  | 86.60% | 0.833 | 0.00E+00  |
| PDPN          | PreHTC | 94.80%  | 73.60% | 0.753 | 0.00E+00  |
| FRZB          | PreHTC | 99.80%  | 78.60% | 0.718 | 0.00E+00  |
| FXD1          | PreHTC | 94.50%  | 71.30% | 0.702 | 0.00E+00  |
| PLAC9         | PreHTC | 99.80%  | 96.60% | 0.692 | 0.00E+00  |
| ITM2A         | PreHTC | 95.10%  | 65.50% | 0.682 | 0.00E+00  |
| HAPLN1        | PreHTC | 100.00% | 94.10% | 0.672 | 0.00E+00  |
| S100B         | PreHTC | 100.00% | 91.80% | 0.662 | 0.00E+00  |
| SPINT2        | PreHTC | 99.80%  | 88.40% | 0.647 | 0.00E+00  |
| CHAD          | PreHTC | 99.90%  | 83.70% | 0.647 | 0.00E+00  |
| SERPINA5      | PreHTC | 98.50%  | 82.10% | 0.643 | 0.00E+00  |
| ACAN          | PreHTC | 100.00% | 96.00% | 0.641 | 0.00E+00  |
| S100A1        | PreHTC | 100.00% | 87.70% | 0.611 | 0.00E+00  |
| WWP2          | PreHTC | 96.50%  | 80.70% | 0.589 | 0.00E+00  |
| MDFI          | PreHTC | 94.80%  | 66.60% | 0.589 | 0.00E+00  |
| COL9A2        | PreHTC | 95.00%  | 65.10% | 0.586 | 0.00E+00  |

|          |        |         |         |       |             |
|----------|--------|---------|---------|-------|-------------|
| SERPINA1 | PreHTC | 100.00% | 95.80%  | 0.557 | 0.00E+00    |
| MIA      | PreHTC | 99.90%  | 95.00%  | 0.549 | 0.00E+00    |
| DKK1     | PreHTC | 45.60%  | 14.60%  | 0.534 | 0.00E+00    |
| PHOSPHO1 | PreHTC | 57.00%  | 16.40%  | 0.526 | 0.00E+00    |
| MRPS6    | PreHTC | 90.50%  | 65.40%  | 0.517 | 0.00E+00    |
| COL11A2  | PreHTC | 96.40%  | 71.00%  | 0.501 | 0.00E+00    |
| WIF1     | PreHTC | 54.90%  | 20.10%  | 0.491 | 0.00E+00    |
| MST4     | PreHTC | 86.60%  | 53.20%  | 0.489 | 0.00E+00    |
| FBXO2    | PreHTC | 98.30%  | 85.00%  | 0.447 | 0           |
| ITM2C    | PreHTC | 99.60%  | 92.60%  | 0.445 | 0           |
| NGFRAP1  | PreHTC | 98.50%  | 88.10%  | 0.429 | 0           |
| SSR4     | PreHTC | 99.70%  | 96.40%  | 0.425 | 0           |
| SERF2    | PreHTC | 100.00% | 99.80%  | 0.330 | 0           |
| FTL      | PreHTC | 100.00% | 100.00% | 0.274 | 0           |
| EXTL1    | PreHTC | 51.10%  | 19.30%  | 0.290 | 1.0517E-297 |
| NUCB2    | PreHTC | 99.10%  | 89.00%  | 0.412 | 4.8112E-291 |
| TSPAN13  | PreHTC | 61.90%  | 30.50%  | 0.548 | 5.1207E-289 |
| APOD     | PreHTC | 94.80%  | 72.30%  | 0.625 | 6.688E-287  |
| TMEM59   | PreHTC | 99.80%  | 98.00%  | 0.355 | 1.0054E-285 |
| FXVD6    | PreHTC | 97.20%  | 85.40%  | 0.435 | 1.7538E-275 |
| TTLL7    | PreHTC | 67.20%  | 34.00%  | 0.357 | 7.7183E-275 |
| GREM1    | PreHTC | 51.20%  | 21.90%  | 0.791 | 4.5545E-271 |
| TSPAN6   | PreHTC | 91.90%  | 68.70%  | 0.397 | 5.194E-271  |
| RAMP1    | PreHTC | 53.80%  | 23.10%  | 0.528 | 1.7406E-268 |
| SPTSSB   | PreHTC | 43.70%  | 15.80%  | 0.366 | 7.7836E-265 |
| CPE      | PreHTC | 62.90%  | 31.70%  | 0.443 | 1.9611E-261 |
| BHLHE41  | PreHTC | 83.80%  | 56.00%  | 0.454 | 5.7425E-261 |
| COL9A1   | PreHTC | 49.20%  | 20.20%  | 0.497 | 1.5503E-258 |
| PRDX4    | PreHTC | 98.80%  | 90.60%  | 0.406 | 1.2044E-257 |
| DUSP1    | PreHTC | 92.70%  | 74.60%  | 0.538 | 6.918E-254  |
| EDIL3    | PreHTC | 90.40%  | 73.50%  | 0.431 | 7.9572E-250 |
| FCGRT    | PreHTC | 93.10%  | 76.60%  | 0.369 | 2.9226E-246 |
| TMED10   | PreHTC | 98.80%  | 89.80%  | 0.337 | 1.3377E-244 |
| FGFR1    | PreHTC | 88.90%  | 67.80%  | 0.461 | 1.9056E-240 |
| TSPO     | PreHTC | 99.50%  | 94.30%  | 0.355 | 1.8256E-228 |
| PEBP1    | PreHTC | 99.30%  | 95.50%  | 0.301 | 5.4806E-223 |
| PCOLCE2  | PreHTC | 100.00% | 96.70%  | 0.339 | 7.2149E-222 |
| C2orf40  | PreHTC | 100.00% | 99.80%  | 0.522 | 1.9157E-220 |
| MFI2     | PreHTC | 79.30%  | 52.50%  | 0.354 | 1.6613E-216 |
| STC2     | PreHTC | 70.70%  | 39.40%  | 0.459 | 2.8687E-215 |
| COL9A3   | PreHTC | 99.60%  | 87.70%  | 0.431 | 3.78E-208   |

|             |        |         |        |       |           |
|-------------|--------|---------|--------|-------|-----------|
| SPARC       | PreHTC | 100.00% | 97.00% | 0.354 | 4.79E-208 |
| LECT1       | PreHTC | 73.00%  | 44.30% | 0.598 | 5.06E-207 |
| RBP4        | PreHTC | 88.00%  | 67.80% | 0.602 | 8.54E-201 |
| LDLRAD4     | PreHTC | 80.40%  | 58.00% | 0.395 | 2.16E-198 |
| RASD1       | PreHTC | 84.20%  | 60.40% | 0.518 | 2.80E-194 |
| COL10A1     | PreHTC | 34.30%  | 12.90% | 0.983 | 9.19E-193 |
| HLA-A       | PreHTC | 99.90%  | 98.70% | 0.307 | 8.57E-191 |
| GDF10       | PreHTC | 86.30%  | 59.40% | 0.354 | 1.20E-186 |
| DAP         | PreHTC | 86.50%  | 66.20% | 0.302 | 1.05E-184 |
| MFGE8       | PreHTC | 98.50%  | 93.20% | 0.501 | 2.00E-181 |
| FOS         | PreHTC | 99.80%  | 97.40% | 0.329 | 1.39E-180 |
| JUNB        | PreHTC | 99.60%  | 99.10% | 0.329 | 4.90E-177 |
| EGR1        | PreHTC | 97.20%  | 90.30% | 0.402 | 9.54E-176 |
| CILP        | PreHTC | 98.40%  | 89.10% | 0.507 | 2.40E-175 |
| CD99        | PreHTC | 99.60%  | 96.70% | 0.282 | 4.53E-175 |
| SLC44A2     | PreHTC | 67.50%  | 41.80% | 0.289 | 2.82E-174 |
| SERTAD4     | PreHTC | 66.00%  | 41.20% | 0.346 | 2.77E-169 |
| STK38L      | PreHTC | 85.50%  | 64.30% | 0.356 | 2.45E-168 |
| S100A13     | PreHTC | 99.80%  | 97.20% | 0.260 | 5.64E-168 |
| AP3S1       | PreHTC | 96.40%  | 84.50% | 0.323 | 1.69E-166 |
| SERPINI1    | PreHTC | 59.10%  | 33.70% | 0.350 | 2.94E-166 |
| TSPAN3      | PreHTC | 81.50%  | 61.40% | 0.291 | 3.96E-165 |
| GPC6        | PreHTC | 88.10%  | 70.60% | 0.319 | 3.62E-164 |
| CNPY2       | PreHTC | 93.40%  | 80.00% | 0.301 | 1.04E-161 |
| CHID1       | PreHTC | 84.00%  | 66.20% | 0.294 | 7.74E-160 |
| SLC14A1     | PreHTC | 67.20%  | 37.70% | 0.278 | 5.39E-158 |
| FOXA3       | PreHTC | 65.20%  | 39.00% | 0.292 | 5.84E-158 |
| GSN         | PreHTC | 98.50%  | 91.90% | 0.251 | 6.14E-158 |
| COL11A1     | PreHTC | 95.60%  | 77.10% | 0.284 | 4.20E-157 |
| CD59        | PreHTC | 99.00%  | 93.20% | 0.296 | 2.52E-155 |
| PLD3        | PreHTC | 97.30%  | 87.30% | 0.271 | 6.95E-155 |
| NR4A1       | PreHTC | 78.80%  | 55.80% | 0.393 | 6.69E-154 |
| NTAN1       | PreHTC | 60.40%  | 36.80% | 0.293 | 6.82E-151 |
| RNF130      | PreHTC | 79.80%  | 59.10% | 0.276 | 5.75E-145 |
| KRT10       | PreHTC | 94.10%  | 81.20% | 0.293 | 1.26E-144 |
| NDRG2       | PreHTC | 87.30%  | 64.50% | 0.261 | 2.02E-144 |
| SOX9        | PreHTC | 87.10%  | 69.00% | 0.322 | 1.75E-143 |
| HSPB6       | PreHTC | 62.80%  | 38.90% | 0.264 | 1.38E-142 |
| XIST        | PreHTC | 77.80%  | 58.50% | 0.354 | 3.25E-140 |
| CTA-29F11.1 | PreHTC | 61.30%  | 36.00% | 0.264 | 4.59E-140 |
| IER2        | PreHTC | 93.60%  | 85.30% | 0.408 | 1.23E-138 |

|             |        |         |        |       |           |
|-------------|--------|---------|--------|-------|-----------|
| TIMP4       | PreHTC | 80.50%  | 62.40% | 0.343 | 7.59E-136 |
| NDUFA1      | PreHTC | 98.00%  | 92.70% | 0.267 | 9.96E-133 |
| GLIPR1      | PreHTC | 81.70%  | 61.50% | 0.306 | 9.44E-130 |
| RHOB        | PreHTC | 88.80%  | 75.10% | 0.351 | 1.56E-128 |
| PDE4DIP     | PreHTC | 82.50%  | 64.70% | 0.256 | 3.95E-128 |
| IGFBP7      | PreHTC | 74.20%  | 56.10% | 0.495 | 3.06E-126 |
| SLC26A2     | PreHTC | 60.50%  | 40.20% | 0.314 | 5.52E-123 |
| ATRAID      | PreHTC | 96.50%  | 89.10% | 0.259 | 1.98E-122 |
| RHOBTB3     | PreHTC | 71.70%  | 50.90% | 0.263 | 4.36E-122 |
| LDLR        | PreHTC | 58.40%  | 36.30% | 0.270 | 2.61E-121 |
| PPP1R3C     | PreHTC | 85.10%  | 66.50% | 0.291 | 4.56E-117 |
| FOSB        | PreHTC | 96.20%  | 83.10% | 0.277 | 8.95E-115 |
| EGR3        | PreHTC | 41.20%  | 22.90% | 0.359 | 3.00E-110 |
| MEF2C       | PreHTC | 61.00%  | 40.50% | 0.286 | 4.46E-109 |
| CALM1       | PreHTC | 97.90%  | 93.70% | 0.274 | 4.97E-109 |
| RPN2        | PreHTC | 91.90%  | 80.20% | 0.251 | 1.14E-108 |
| WISP3       | PreHTC | 80.50%  | 61.70% | 0.256 | 4.41E-107 |
| SERTAD4-AS1 | PreHTC | 79.40%  | 61.70% | 0.258 | 4.96E-103 |
| NR1D1       | PreHTC | 83.30%  | 65.20% | 0.253 | 1.22E-102 |
| CRYAB       | PreHTC | 91.90%  | 80.20% | 0.375 | 7.95E-102 |
| RCN3        | PreHTC | 94.20%  | 84.80% | 0.251 | 3.82E-98  |
| SLC29A1     | PreHTC | 89.70%  | 77.40% | 0.312 | 2.02E-96  |
| INSIG1      | PreHTC | 65.50%  | 46.80% | 0.340 | 2.17E-96  |
| SNAI2       | PreHTC | 73.40%  | 55.80% | 0.290 | 7.69E-95  |
| CYSTM1      | PreHTC | 77.20%  | 62.30% | 0.269 | 3.15E-94  |
| COL2A1      | PreHTC | 98.20%  | 91.40% | 0.279 | 5.03E-94  |
| AGR2        | PreHTC | 14.40%  | 4.60%  | 0.365 | 8.39E-90  |
| BTG2        | PreHTC | 82.20%  | 70.50% | 0.373 | 1.35E-89  |
| NRN1        | PreHTC | 94.20%  | 84.30% | 0.259 | 2.15E-87  |
| MEG3        | PreHTC | 66.40%  | 49.20% | 0.353 | 3.17E-80  |
| HMGCS1      | PreHTC | 54.00%  | 37.40% | 0.341 | 6.88E-74  |
| TF          | PreHTC | 66.70%  | 50.10% | 0.439 | 1.14E-64  |
| IBSP        | PreHTC | 26.00%  | 14.00% | 0.967 | 3.36E-64  |
| SLPI        | PreHTC | 35.10%  | 20.40% | 0.317 | 1.48E-59  |
| KCNMA1      | PreHTC | 76.90%  | 63.30% | 0.269 | 6.26E-58  |
| CST3        | PreHTC | 100.00% | 99.60% | 0.260 | 3.58E-56  |
| SPP1        | PreHTC | 37.70%  | 35.10% | 0.716 | 2.70E-06  |
| COL2A1      | RepC   | 99.80%  | 90.60% | 1.345 | 0.00E+00  |
| CLEC3A      | RepC   | 98.60%  | 68.30% | 1.167 | 0.00E+00  |
| SPARC       | RepC   | 99.90%  | 96.80% | 0.902 | 0.00E+00  |
| C2orf40     | RepC   | 100.00% | 99.80% | 0.860 | 0.00E+00  |



|           |      |         |        |       |           |
|-----------|------|---------|--------|-------|-----------|
| CTHRC1    | RepC | 81.60%  | 48.90% | 0.737 | 0.00E+00  |
| CILP      | RepC | 99.20%  | 88.30% | 0.683 | 0.00E+00  |
| OGN       | RepC | 94.80%  | 77.70% | 0.636 | 0.00E+00  |
| CILP2     | RepC | 94.00%  | 71.60% | 0.634 | 0.00E+00  |
| TNFRSF11B | RepC | 95.80%  | 75.40% | 0.625 | 0.00E+00  |
| OMD       | RepC | 87.10%  | 60.80% | 0.622 | 0.00E+00  |
| COL11A1   | RepC | 95.10%  | 75.90% | 0.579 | 0.00E+00  |
| COL3A1    | RepC | 96.10%  | 73.40% | 0.572 | 0.00E+00  |
| MATN3     | RepC | 80.10%  | 49.20% | 0.543 | 0.00E+00  |
| COMP      | RepC | 100.00% | 99.90% | 0.536 | 0.00E+00  |
| COL9A2    | RepC | 92.60%  | 63.30% | 0.465 | 0.00E+00  |
| SMOC2     | RepC | 99.20%  | 88.00% | 0.444 | 0.00E+00  |
| C2orf82   | RepC | 99.90%  | 92.70% | 0.432 | 0.00E+00  |
| FMOD      | RepC | 100.00% | 99.00% | 0.414 | 0.00E+00  |
| SERPINE2  | RepC | 90.70%  | 55.00% | 0.413 | 0.00E+00  |
| CHAD      | RepC | 99.10%  | 82.70% | 0.409 | 0.00E+00  |
| COL5A2    | RepC | 86.50%  | 60.50% | 0.408 | 0.00E+00  |
| PCOLCE2   | RepC | 100.00% | 96.50% | 0.401 | 0.00E+00  |
| S100A1    | RepC | 99.50%  | 86.90% | 0.379 | 0.00E+00  |
| SCRG1     | RepC | 100.00% | 99.00% | 0.376 | 0.00E+00  |
| SBSPON    | RepC | 71.90%  | 39.80% | 0.354 | 0.00E+00  |
| SRPX2     | RepC | 83.10%  | 51.30% | 0.342 | 0.00E+00  |
| DNER      | RepC | 44.70%  | 16.10% | 0.322 | 0.00E+00  |
| PRELP     | RepC | 100.00% | 99.60% | 0.441 | 1.82E-303 |
| CA9       | RepC | 65.30%  | 34.40% | 0.305 | 2.36E-303 |
| FXYD6     | RepC | 97.80%  | 84.40% | 0.320 | 1.69E-298 |
| TSPAN2    | RepC | 92.20%  | 65.90% | 0.333 | 2.44E-297 |
| UROC1     | RepC | 43.80%  | 18.20% | 0.325 | 9.83E-290 |
| PID1      | RepC | 86.30%  | 60.10% | 0.319 | 1.32E-289 |
| IGF2      | RepC | 53.00%  | 25.10% | 0.436 | 2.70E-285 |
| ANGPTL2   | RepC | 99.20%  | 87.60% | 0.337 | 2.55E-281 |
| SERPINE1  | RepC | 65.70%  | 36.60% | 0.468 | 6.93E-281 |
| P4HA2     | RepC | 86.00%  | 60.70% | 0.315 | 4.08E-271 |
| NTRK2     | RepC | 64.80%  | 35.80% | 0.291 | 5.25E-271 |
| SERPINA5  | RepC | 97.50%  | 81.10% | 0.311 | 5.59E-267 |
| FIBIN     | RepC | 95.90%  | 81.00% | 0.420 | 1.42E-264 |
| LOX       | RepC | 61.70%  | 33.10% | 0.294 | 6.19E-263 |
| EPS8L2    | RepC | 77.30%  | 50.80% | 0.288 | 1.57E-240 |
| COL11A2   | RepC | 92.80%  | 69.80% | 0.329 | 1.10E-238 |
| LECT1     | RepC | 67.90%  | 43.10% | 0.539 | 1.08E-231 |
| S100A13   | RepC | 99.90%  | 97.00% | 0.255 | 1.24E-230 |

|           |       |         |        |       |           |
|-----------|-------|---------|--------|-------|-----------|
| STK38L    | RepC  | 86.80%  | 62.50% | 0.305 | 4.75E-226 |
| FAM162A   | RepC  | 96.20%  | 84.60% | 0.279 | 9.15E-223 |
| AQP3      | RepC  | 55.70%  | 31.00% | 0.501 | 3.22E-220 |
| TNNT3     | RepC  | 53.60%  | 29.20% | 0.499 | 1.68E-218 |
| PPIC      | RepC  | 89.70%  | 69.60% | 0.316 | 1.91E-218 |
| ITM2A     | RepC  | 88.40%  | 64.60% | 0.304 | 1.79E-211 |
| NRN1      | RepC  | 94.50%  | 83.60% | 0.334 | 5.64E-208 |
| LDLRAD4   | RepC  | 80.20%  | 56.50% | 0.251 | 7.96E-191 |
| CYTL1     | RepC  | 96.20%  | 86.30% | 0.414 | 8.47E-185 |
| PAPSS2    | RepC  | 92.00%  | 74.10% | 0.251 | 2.69E-182 |
| COL9A3    | RepC  | 99.40%  | 86.90% | 0.260 | 2.31E-149 |
| ID2       | RepC  | 97.30%  | 90.20% | 0.275 | 9.38E-130 |
| CKB       | RepC  | 52.30%  | 32.50% | 0.251 | 2.52E-119 |
| GREM1     | RepC  | 38.80%  | 22.10% | 0.298 | 1.03E-108 |
| RCAN1     | RepC  | 80.00%  | 64.30% | 0.305 | 6.45E-79  |
| SPP1      | RepC  | 47.50%  | 33.10% | 0.328 | 9.60E-76  |
| TNFRSF11B | PreFC | 98.70%  | 75.90% | 1.363 | 0.00E+00  |
| IL11      | PreFC | 28.40%  | 3.60%  | 1.296 | 0.00E+00  |
| OGN       | PreFC | 99.20%  | 77.90% | 1.181 | 0.00E+00  |
| COL3A1    | PreFC | 99.60%  | 74.00% | 1.169 | 0.00E+00  |
| SERPINE2  | PreFC | 97.60%  | 55.70% | 1.119 | 0.00E+00  |
| TNFAIP6   | PreFC | 56.20%  | 15.20% | 1.043 | 0.00E+00  |
| ABI3BP    | PreFC | 94.50%  | 41.50% | 1.023 | 0.00E+00  |
| CD55      | PreFC | 94.70%  | 67.70% | 0.985 | 0.00E+00  |
| ASPN      | PreFC | 89.00%  | 56.00% | 0.954 | 0.00E+00  |
| HTRA1     | PreFC | 99.80%  | 78.50% | 0.950 | 0.00E+00  |
| FN1       | PreFC | 100.00% | 99.90% | 0.842 | 0.00E+00  |
| S100A4    | PreFC | 97.60%  | 56.20% | 0.836 | 0.00E+00  |
| TSPAN2    | PreFC | 98.50%  | 66.30% | 0.833 | 0.00E+00  |
| COMP      | PreFC | 100.00% | 99.90% | 0.819 | 0.00E+00  |
| NGF       | PreFC | 76.50%  | 16.50% | 0.812 | 0.00E+00  |
| GAS1      | PreFC | 90.80%  | 34.90% | 0.805 | 0.00E+00  |
| SMOC1     | PreFC | 95.00%  | 40.60% | 0.769 | 0.00E+00  |
| PTGES     | PreFC | 84.10%  | 30.40% | 0.768 | 0.00E+00  |
| COL5A1    | PreFC | 95.10%  | 46.10% | 0.751 | 0.00E+00  |
| CILP2     | PreFC | 96.30%  | 72.30% | 0.731 | 0.00E+00  |
| TGFBI     | PreFC | 92.00%  | 31.40% | 0.707 | 0.00E+00  |
| SRPX2     | PreFC | 95.50%  | 51.10% | 0.704 | 0.00E+00  |
| S100A6    | PreFC | 100.00% | 99.90% | 0.685 | 0.00E+00  |
| COL1A2    | PreFC | 93.10%  | 45.80% | 0.647 | 0.00E+00  |
| COL2A1    | PreFC | 99.60%  | 91.00% | 0.634 | 0.00E+00  |

|           |       |         |        |       |          |
|-----------|-------|---------|--------|-------|----------|
| TNC       | PreFC | 93.20%  | 44.60% | 0.626 | 0.00E+00 |
| INHBA     | PreFC | 92.90%  | 65.50% | 0.619 | 0.00E+00 |
| COL15A1   | PreFC | 86.20%  | 29.10% | 0.611 | 0.00E+00 |
| S100A2    | PreFC | 28.00%  | 6.00%  | 0.608 | 0.00E+00 |
| UGP2      | PreFC | 99.20%  | 84.60% | 0.602 | 0.00E+00 |
| PAPPA     | PreFC | 41.50%  | 7.80%  | 0.599 | 0.00E+00 |
| OSTC      | PreFC | 99.10%  | 80.90% | 0.593 | 0.00E+00 |
| NT5E      | PreFC | 89.20%  | 41.50% | 0.589 | 0.00E+00 |
| CRLF1     | PreFC | 71.40%  | 18.40% | 0.588 | 0.00E+00 |
| COL6A3    | PreFC | 93.80%  | 50.40% | 0.587 | 0.00E+00 |
| SERPINE1  | PreFC | 83.20%  | 35.50% | 0.584 | 0.00E+00 |
| AMTN      | PreFC | 33.80%  | 7.50%  | 0.560 | 0.00E+00 |
| AKR1C2    | PreFC | 82.10%  | 39.60% | 0.549 | 0.00E+00 |
| LOXL2     | PreFC | 72.20%  | 19.90% | 0.549 | 0.00E+00 |
| ANKH      | PreFC | 95.90%  | 69.60% | 0.537 | 0.00E+00 |
| CAPS      | PreFC | 84.10%  | 33.50% | 0.523 | 0.00E+00 |
| CRTAC1    | PreFC | 99.40%  | 70.60% | 0.523 | 0        |
| NOVA1     | PreFC | 73.90%  | 33.70% | 0.513 | 0        |
| VCAN      | PreFC | 70.30%  | 21.30% | 0.512 | 0        |
| CLIC3     | PreFC | 45.60%  | 11.60% | 0.509 | 0        |
| PART1     | PreFC | 79.50%  | 38.40% | 0.499 | 0        |
| CILP      | PreFC | 99.90%  | 88.70% | 0.497 | 0        |
| SLC7A2    | PreFC | 75.60%  | 31.10% | 0.494 | 0        |
| FMOD      | PreFC | 100.00% | 99.10% | 0.486 | 0        |
| COL6A2    | PreFC | 99.30%  | 85.50% | 0.486 | 0        |
| DKK3      | PreFC | 82.80%  | 36.30% | 0.486 | 0        |
| DNER      | PreFC | 64.80%  | 14.60% | 0.471 | 0        |
| CTHRC1    | PreFC | 92.60%  | 48.90% | 0.468 | 0        |
| DIO2      | PreFC | 62.10%  | 18.20% | 0.462 | 0        |
| FSTL1     | PreFC | 94.50%  | 60.70% | 0.461 | 0        |
| TNFRSF12A | PreFC | 94.60%  | 66.10% | 0.460 | 0        |
| COL6A1    | PreFC | 98.50%  | 79.90% | 0.459 | 0        |
| LOXL3     | PreFC | 78.60%  | 29.00% | 0.459 | 0        |
| EPYC      | PreFC | 31.20%  | 4.20%  | 0.450 | 0        |
| UROC1     | PreFC | 57.50%  | 17.50% | 0.447 | 0        |
| PPIC      | PreFC | 96.50%  | 69.60% | 0.407 | 0        |
| COL5A2    | PreFC | 93.10%  | 60.70% | 0.403 | 0        |
| PID1      | PreFC | 93.70%  | 60.20% | 0.403 | 0        |
| PMP22     | PreFC | 99.00%  | 87.70% | 0.403 | 0.00E+00 |
| THY1      | PreFC | 67.50%  | 17.10% | 0.401 | 0.00E+00 |
| AK1       | PreFC | 98.70%  | 83.80% | 0.397 | 0.00E+00 |

|               |       |         |         |       |          |
|---------------|-------|---------|---------|-------|----------|
| THBS3         | PreFC | 76.30%  | 27.70%  | 0.395 | 0.00E+00 |
| CD151         | PreFC | 97.80%  | 80.70%  | 0.384 | 0.00E+00 |
| ADAMTS6       | PreFC | 81.20%  | 35.30%  | 0.376 | 0.00E+00 |
| PDLIM7        | PreFC | 75.20%  | 25.60%  | 0.375 | 0.00E+00 |
| SEC61G        | PreFC | 99.80%  | 95.80%  | 0.373 | 0.00E+00 |
| FNIP2         | PreFC | 73.80%  | 32.90%  | 0.365 | 0.00E+00 |
| RPL28         | PreFC | 100.00% | 99.90%  | 0.360 | 0.00E+00 |
| IGFBP3        | PreFC | 28.20%  | 4.20%   | 0.358 | 0.00E+00 |
| DOK1          | PreFC | 74.60%  | 33.80%  | 0.358 | 0.00E+00 |
| OAZ1          | PreFC | 100.00% | 99.30%  | 0.357 | 0.00E+00 |
| C7orf73       | PreFC | 96.80%  | 75.00%  | 0.352 | 0.00E+00 |
| LEPREL1       | PreFC | 50.60%  | 9.80%   | 0.339 | 0.00E+00 |
| TMEM167A      | PreFC | 92.80%  | 59.90%  | 0.338 | 0.00E+00 |
| GAPDH         | PreFC | 100.00% | 100.00% | 0.335 | 0.00E+00 |
| GRN           | PreFC | 92.50%  | 63.20%  | 0.333 | 0.00E+00 |
| CDON          | PreFC | 80.90%  | 38.60%  | 0.332 | 0.00E+00 |
| YIF1A         | PreFC | 92.90%  | 62.90%  | 0.330 | 0.00E+00 |
| CD68          | PreFC | 78.30%  | 36.90%  | 0.328 | 0.00E+00 |
| ATP5E         | PreFC | 99.70%  | 94.70%  | 0.325 | 0.00E+00 |
| GALNT15       | PreFC | 84.10%  | 45.00%  | 0.320 | 0.00E+00 |
| ANK3          | PreFC | 73.90%  | 29.80%  | 0.317 | 0.00E+00 |
| RABAC1        | PreFC | 99.90%  | 95.40%  | 0.313 | 0.00E+00 |
| LTBP2         | PreFC | 73.80%  | 32.60%  | 0.313 | 0.00E+00 |
| RPLP0         | PreFC | 100.00% | 99.90%  | 0.312 | 0.00E+00 |
| RPS12         | PreFC | 100.00% | 100.00% | 0.304 | 0.00E+00 |
| FAP           | PreFC | 68.10%  | 24.60%  | 0.302 | 0.00E+00 |
| BAALC         | PreFC | 63.60%  | 18.50%  | 0.301 | 0.00E+00 |
| RPSA          | PreFC | 99.90%  | 99.20%  | 0.299 | 0.00E+00 |
| IGFBP7        | PreFC | 92.80%  | 53.10%  | 0.293 | 0.00E+00 |
| S100A10       | PreFC | 100.00% | 99.20%  | 0.289 | 0.00E+00 |
| SMIM5         | PreFC | 48.30%  | 13.60%  | 0.289 | 0.00E+00 |
| UBAC2         | PreFC | 76.80%  | 39.80%  | 0.287 | 0.00E+00 |
| WNT16         | PreFC | 13.00%  | 1.20%   | 0.285 | 0.00E+00 |
| RP11-456H18.2 | PreFC | 53.10%  | 14.80%  | 0.284 | 0.00E+00 |
| EVI2A         | PreFC | 58.40%  | 19.40%  | 0.274 | 0.00E+00 |
| OST4          | PreFC | 99.90%  | 97.90%  | 0.274 | 0.00E+00 |
| GPR64         | PreFC | 68.10%  | 27.30%  | 0.273 | 0.00E+00 |
| RPS24         | PreFC | 100.00% | 99.90%  | 0.270 | 0.00E+00 |
| RPL27A        | PreFC | 100.00% | 99.90%  | 0.270 | 0.00E+00 |
| C10orf105     | PreFC | 59.00%  | 14.90%  | 0.267 | 0.00E+00 |
| CENPP         | PreFC | 49.10%  | 12.20%  | 0.258 | 0.00E+00 |

|          |       |         |         |       |           |
|----------|-------|---------|---------|-------|-----------|
| CXCL14   | PreFC | 22.70%  | 4.70%   | 0.817 | 6.36E-298 |
| LMAN1    | PreFC | 87.40%  | 55.10%  | 0.316 | 5.79E-295 |
| PLAUR    | PreFC | 65.30%  | 28.70%  | 0.266 | 4.26E-294 |
| AEBP1    | PreFC | 97.70%  | 81.60%  | 0.408 | 4.24E-292 |
| RCAN1    | PreFC | 92.50%  | 63.30%  | 0.461 | 1.03E-288 |
| PGAM1    | PreFC | 99.10%  | 91.00%  | 0.335 | 4.57E-283 |
| SLC39A14 | PreFC | 94.10%  | 70.20%  | 0.330 | 2.84E-280 |
| OMD      | PreFC | 92.20%  | 61.30%  | 0.375 | 5.47E-279 |
| CDA      | PreFC | 65.80%  | 31.40%  | 0.268 | 1.18E-274 |
| TM4SF1   | PreFC | 88.70%  | 57.90%  | 0.339 | 7.32E-272 |
| TAGLN2   | PreFC | 97.30%  | 75.90%  | 0.288 | 1.70E-271 |
| ERGIC3   | PreFC | 96.90%  | 78.80%  | 0.290 | 2.03E-263 |
| C19orf10 | PreFC | 99.50%  | 90.50%  | 0.303 | 4.98E-260 |
| LDHA     | PreFC | 100.00% | 99.60%  | 0.276 | 4.83E-256 |
| TRPS1    | PreFC | 84.10%  | 50.40%  | 0.285 | 3.08E-254 |
| AQP3     | PreFC | 62.00%  | 31.30%  | 0.563 | 6.05E-243 |
| SPARC    | PreFC | 100.00% | 96.90%  | 0.501 | 8.78E-233 |
| KDELR3   | PreFC | 87.00%  | 55.80%  | 0.287 | 1.54E-230 |
| CLU      | PreFC | 100.00% | 100.00% | 0.329 | 2.28E-229 |
| FNDC3B   | PreFC | 90.40%  | 61.30%  | 0.266 | 1.68E-228 |
| TMED3    | PreFC | 93.20%  | 66.60%  | 0.267 | 3.69E-228 |
| COX17    | PreFC | 93.60%  | 70.50%  | 0.318 | 5.22E-228 |
| SMOC2    | PreFC | 99.60%  | 88.50%  | 0.338 | 2.43E-226 |
| SEMA3D   | PreFC | 46.80%  | 19.70%  | 0.290 | 2.38E-223 |
| MRPL33   | PreFC | 97.70%  | 85.70%  | 0.275 | 1.25E-222 |
| KDELR2   | PreFC | 99.10%  | 90.00%  | 0.266 | 5.95E-221 |
| SLC16A3  | PreFC | 93.00%  | 69.90%  | 0.300 | 8.27E-220 |
| SBSPON   | PreFC | 73.40%  | 41.00%  | 0.333 | 8.50E-220 |
| PRELP    | PreFC | 100.00% | 99.60%  | 0.257 | 3.77E-214 |
| PFKP     | PreFC | 92.10%  | 64.40%  | 0.268 | 3.59E-211 |
| LUM      | PreFC | 100.00% | 99.80%  | 0.343 | 3.62E-210 |
| CKB      | PreFC | 60.70%  | 32.30%  | 0.460 | 4.36E-210 |
| CAV1     | PreFC | 93.60%  | 74.10%  | 0.318 | 2.20E-206 |
| UGDH     | PreFC | 86.90%  | 57.30%  | 0.251 | 1.55E-204 |
| ATP1B1   | PreFC | 88.20%  | 58.50%  | 0.271 | 1.89E-202 |
| P4HB     | PreFC | 99.90%  | 96.40%  | 0.278 | 2.42E-201 |
| HCFC1R1  | PreFC | 88.20%  | 58.70%  | 0.256 | 3.60E-201 |
| PCSK1N   | PreFC | 48.00%  | 21.10%  | 0.257 | 1.69E-199 |
| DST      | PreFC | 96.60%  | 77.90%  | 0.262 | 1.24E-188 |
| DPT      | PreFC | 63.20%  | 32.80%  | 0.296 | 9.27E-181 |
| ID2      | PreFC | 98.70%  | 90.30%  | 0.347 | 1.15E-167 |

|          |       |         |         |       |           |
|----------|-------|---------|---------|-------|-----------|
| ANGPTL2  | PreFC | 99.40%  | 88.10%  | 0.278 | 8.30E-167 |
| MATN3    | PreFC | 77.10%  | 51.00%  | 0.383 | 1.80E-151 |
| S100A13  | PreFC | 99.90%  | 97.10%  | 0.266 | 5.03E-149 |
| COL11A1  | PreFC | 95.20%  | 76.70%  | 0.272 | 2.80E-143 |
| ENPP1    | PreFC | 88.80%  | 67.00%  | 0.324 | 2.26E-128 |
| IGFBP5   | PreFC | 38.00%  | 20.20%  | 0.599 | 1.23E-99  |
| SPP1     | PreFC | 55.60%  | 32.60%  | 0.755 | 2.15E-92  |
| CCDC80   | PreFC | 95.30%  | 84.30%  | 0.318 | 3.88E-89  |
| TIMP1    | PreFC | 100.00% | 99.40%  | 0.468 | 2.08E-47  |
| CHI3L2   | RegC  | 98.70%  | 85.80%  | 1.498 | 0.00E+00  |
| IFITM3   | RegC  | 98.90%  | 96.80%  | 0.568 | 7.92E-228 |
| CHI3L1   | RegC  | 93.90%  | 76.10%  | 0.953 | 1.87E-207 |
| VCAM1    | RegC  | 46.90%  | 15.80%  | 0.882 | 7.46E-203 |
| CLU      | RegC  | 99.90%  | 100.00% | 0.605 | 7.40E-189 |
| NNMT     | RegC  | 99.40%  | 95.60%  | 0.506 | 2.06E-172 |
| TNC      | RegC  | 83.20%  | 48.60%  | 0.520 | 9.23E-150 |
| CRTAC1   | RegC  | 95.10%  | 72.90%  | 0.285 | 1.17E-143 |
| MALAT1   | RegC  | 100.00% | 100.00% | 0.305 | 4.49E-124 |
| IFITM2   | RegC  | 91.40%  | 81.80%  | 0.475 | 8.93E-124 |
| BTG1     | RegC  | 96.40%  | 91.60%  | 0.497 | 2.12E-122 |
| EFEMP1   | RegC  | 77.10%  | 55.00%  | 0.475 | 3.69E-118 |
| AEBP1    | RegC  | 91.70%  | 83.10%  | 0.481 | 9.31E-93  |
| C1R      | RegC  | 78.80%  | 65.60%  | 0.294 | 6.33E-71  |
| COL12A1  | RegC  | 54.90%  | 35.10%  | 0.390 | 1.23E-70  |
| OSMR     | RegC  | 70.40%  | 57.30%  | 0.357 | 6.34E-67  |
| ITGB8    | RegC  | 28.20%  | 12.20%  | 0.265 | 4.64E-65  |
| SOD2     | RegC  | 90.20%  | 84.10%  | 0.469 | 4.86E-64  |
| MAFB     | RegC  | 46.50%  | 27.40%  | 0.356 | 9.71E-62  |
| MT2A     | RegC  | 99.90%  | 99.70%  | 0.361 | 1.55E-54  |
| NTN1     | RegC  | 32.90%  | 17.50%  | 0.336 | 4.78E-53  |
| MT1M     | RegC  | 86.70%  | 81.00%  | 0.487 | 2.54E-51  |
| ANK3     | RegC  | 50.40%  | 34.20%  | 0.341 | 1.06E-48  |
| STEAP4   | RegC  | 21.70%  | 9.20%   | 0.321 | 3.30E-46  |
| EGFLAM   | RegC  | 43.90%  | 29.30%  | 0.261 | 4.54E-41  |
| GLRX     | RegC  | 58.40%  | 47.10%  | 0.481 | 2.93E-40  |
| SOCS3    | RegC  | 86.30%  | 79.30%  | 0.282 | 2.97E-38  |
| IRF1     | RegC  | 62.90%  | 48.90%  | 0.291 | 1.70E-37  |
| DIO2     | RegC  | 36.10%  | 22.70%  | 0.323 | 4.70E-32  |
| TCF4     | RegC  | 66.10%  | 57.90%  | 0.259 | 1.93E-31  |
| SLC39A14 | RegC  | 77.80%  | 72.80%  | 0.271 | 7.41E-31  |
| ERRF1    | RegC  | 80.90%  | 76.90%  | 0.307 | 1.32E-29  |

|         |      |        |        |       |          |
|---------|------|--------|--------|-------|----------|
| ARID5B  | RegC | 73.50% | 63.30% | 0.259 | 2.15E-29 |
| CTGF    | RegC | 97.80% | 97.70% | 0.329 | 2.75E-29 |
| ANGPTL4 | RegC | 72.00% | 61.00% | 0.362 | 1.67E-28 |
| GLI3    | RegC | 52.70% | 42.80% | 0.265 | 1.02E-27 |
| MT1X    | RegC | 99.80% | 99.30% | 0.274 | 1.05E-23 |
| ZFP36L2 | RegC | 44.30% | 34.80% | 0.283 | 2.87E-22 |
| MT1E    | RegC | 99.10% | 98.90% | 0.255 | 3.57E-21 |
| IGFBP5  | RegC | 32.00% | 21.80% | 0.809 | 1.65E-20 |
| NFKBIZ  | RegC | 57.30% | 49.40% | 0.254 | 3.75E-20 |
| SLC40A1 | RegC | 42.10% | 32.70% | 0.255 | 1.53E-18 |
| MT1A    | RegC | 48.30% | 40.20% | 0.314 | 4.37E-17 |
| SCARA3  | RegC | 58.80% | 56.70% | 0.285 | 8.31E-12 |
| HMOX1   | RegC | 44.70% | 37.00% | 0.501 | 1.47E-11 |
| RGS16   | RegC | 76.00% | 73.20% | 0.283 | 4.26E-10 |
| TIMP1   | RegC | 99.50% | 99.50% | 0.477 | 1.84E-07 |
| CTSC    | RegC | 31.10% | 27.70% | 0.259 | 4.11E-03 |
| COL1A1  | FC   | 48.00% | 6.70%  | 2.515 | 0.00E+00 |
| TMSB4X  | FC   | 95.80% | 73.40% | 2.336 | 0.00E+00 |
| PRG4    | FC   | 62.60% | 31.80% | 2.152 | 0.00E+00 |
| S100A4  | FC   | 95.00% | 54.90% | 1.925 | 0.00E+00 |
| CRTAC1  | FC   | 98.30% | 69.60% | 1.854 | 0.00E+00 |
| HTRA1   | FC   | 98.80% | 77.80% | 1.602 | 0.00E+00 |
| COL1A2  | FC   | 91.80% | 44.00% | 1.573 | 0.00E+00 |
| TGFBI   | FC   | 90.10% | 29.10% | 1.529 | 0.00E+00 |
| TPPP3   | FC   | 69.80% | 19.00% | 1.479 | 0.00E+00 |
| TNFAIP6 | FC   | 60.20% | 12.70% | 1.398 | 0.00E+00 |
| DPT     | FC   | 73.90% | 29.60% | 1.301 | 0.00E+00 |
| TNC     | FC   | 93.80% | 42.40% | 1.252 | 0.00E+00 |
| ASPN    | FC   | 90.90% | 54.20% | 1.251 | 0.00E+00 |
| LGALS1  | FC   | 95.10% | 91.80% | 1.240 | 0.00E+00 |
| AQP1    | FC   | 48.90% | 3.50%  | 1.207 | 0.00E+00 |
| COL6A3  | FC   | 86.50% | 49.90% | 1.184 | 0.00E+00 |
| COL6A1  | FC   | 95.10% | 79.70% | 1.124 | 0.00E+00 |
| TIMP3   | FC   | 73.20% | 50.90% | 1.076 | 0.00E+00 |
| COL6A2  | FC   | 97.60% | 85.20% | 1.058 | 0.00E+00 |
| PRSS23  | FC   | 59.10% | 21.80% | 1.057 | 0.00E+00 |
| CD55    | FC   | 84.80% | 68.30% | 1.056 | 0.00E+00 |
| SPARCL1 | FC   | 21.70% | 1.20%  | 1.050 | 0.00E+00 |
| THY1    | FC   | 67.70% | 14.90% | 1.040 | 0.00E+00 |
| CRLF1   | FC   | 64.40% | 17.40% | 1.011 | 0.00E+00 |
| FN1     | FC   | 99.90% | 99.90% | 0.963 | 0.00E+00 |

|          |    |         |        |       |          |
|----------|----|---------|--------|-------|----------|
| TNXB     | FC | 68.10%  | 24.80% | 0.940 | 0.00E+00 |
| NBL1     | FC | 58.20%  | 8.90%  | 0.923 | 0.00E+00 |
| S100A10  | FC | 99.80%  | 99.20% | 0.861 | 0.00E+00 |
| TAGLN2   | FC | 97.10%  | 75.00% | 0.848 | 0.00E+00 |
| ISLR     | FC | 89.60%  | 71.30% | 0.833 | 0.00E+00 |
| COL3A1   | FC | 96.50%  | 73.40% | 0.804 | 0.00E+00 |
| CRIP1    | FC | 72.30%  | 27.50% | 0.794 | 0.00E+00 |
| PTGES    | FC | 67.20%  | 31.10% | 0.787 | 0.00E+00 |
| ABI3BP   | FC | 88.00%  | 40.40% | 0.784 | 0.00E+00 |
| CFD      | FC | 22.80%  | 2.10%  | 0.781 | 0.00E+00 |
| S100A6   | FC | 100.00% | 99.90% | 0.767 | 0.00E+00 |
| SH3BGRL3 | FC | 99.30%  | 95.90% | 0.767 | 0.00E+00 |
| CALD1    | FC | 91.70%  | 75.00% | 0.762 | 0.00E+00 |
| VCAN     | FC | 52.00%  | 22.50% | 0.732 | 0.00E+00 |
| S100A11  | FC | 99.20%  | 95.60% | 0.728 | 0.00E+00 |
| COL15A1  | FC | 74.90%  | 28.70% | 0.715 | 0.00E+00 |
| EMP3     | FC | 97.50%  | 91.10% | 0.714 | 0.00E+00 |
| CCND1    | FC | 54.60%  | 8.30%  | 0.713 | 0.00E+00 |
| ECM1     | FC | 54.20%  | 7.90%  | 0.694 | 0.00E+00 |
| PFN1     | FC | 97.00%  | 86.20% | 0.683 | 0.00E+00 |
| MXRA5    | FC | 55.60%  | 17.20% | 0.683 | 0.00E+00 |
| MMP2     | FC | 22.30%  | 3.90%  | 0.668 | 0.00E+00 |
| FSTL1    | FC | 86.50%  | 60.70% | 0.664 | 0.00E+00 |
| MGST3    | FC | 92.90%  | 78.10% | 0.661 | 0.00E+00 |
| IGFBP4   | FC | 54.10%  | 13.50% | 0.661 | 0.00E+00 |
| ITGB5    | FC | 64.00%  | 22.50% | 0.660 | 0.00E+00 |
| TREM1    | FC | 37.10%  | 4.10%  | 0.651 | 0.00E+00 |
| DKK3     | FC | 71.10%  | 36.40% | 0.641 | 0.00E+00 |
| CAPZB    | FC | 84.70%  | 58.90% | 0.634 | 0.00E+00 |
| ATP5E    | FC | 99.30%  | 94.60% | 0.628 | 0.00E+00 |
| CD151    | FC | 95.20%  | 80.40% | 0.628 | 0.00E+00 |
| MT-CO2   | FC | 94.50%  | 95.00% | 0.606 | 0.00E+00 |
| ARPC1B   | FC | 85.40%  | 56.70% | 0.591 | 0.00E+00 |
| CAPS     | FC | 71.60%  | 33.60% | 0.591 | 0.00E+00 |
| MT-ATP6  | FC | 94.40%  | 95.00% | 0.589 | 0.00E+00 |
| TIMP2    | FC | 86.30%  | 68.10% | 0.588 | 0.00E+00 |
| COL5A1   | FC | 80.10%  | 46.70% | 0.585 | 0.00E+00 |
| CAPG     | FC | 78.20%  | 56.80% | 0.571 | 0.00E+00 |
| FAP      | FC | 67.50%  | 22.90% | 0.566 | 0.00E+00 |
| HSD3B7   | FC | 47.70%  | 8.70%  | 0.562 | 0.00E+00 |
| PLAUR    | FC | 65.90%  | 27.10% | 0.561 | 0.00E+00 |



|          |    |        |        |       |          |
|----------|----|--------|--------|-------|----------|
| LUM      | FC | 99.60% | 99.90% | 0.559 | 0.00E+00 |
| PRKCDBP  | FC | 91.10% | 73.40% | 0.559 | 0.00E+00 |
| PDLIM7   | FC | 67.00% | 25.00% | 0.557 | 0.00E+00 |
| CLIC1    | FC | 96.00% | 84.70% | 0.552 | 0.00E+00 |
| TXN      | FC | 96.00% | 85.70% | 0.547 | 0.00E+00 |
| ADAMTS6  | FC | 67.60% | 35.80% | 0.544 | 0.00E+00 |
| PROCR    | FC | 72.30% | 47.50% | 0.538 | 0.00E+00 |
| CRIP2    | FC | 91.70% | 74.50% | 0.536 | 0.00E+00 |
| PPAP2B   | FC | 48.80% | 17.60% | 0.531 | 0.00E+00 |
| ADAMTS5  | FC | 40.60% | 9.00%  | 0.522 | 0.00E+00 |
| MINOS1   | FC | 91.30% | 73.90% | 0.522 | 0.00E+00 |
| IFITM3   | FC | 99.20% | 96.50% | 0.520 | 0.00E+00 |
| PLP2     | FC | 95.80% | 85.70% | 0.514 | 0.00E+00 |
| MT-CYB   | FC | 93.70% | 94.80% | 0.512 | 0.00E+00 |
| SMOC1    | FC | 76.10% | 41.70% | 0.504 | 0.00E+00 |
| MYL6     | FC | 99.70% | 98.20% | 0.503 | 0.00E+00 |
| CRABP2   | FC | 23.20% | 3.50%  | 0.501 | 0.00E+00 |
| COL4A1   | FC | 16.20% | 1.30%  | 0.500 | 0.00E+00 |
| ANXA2    | FC | 99.20% | 97.60% | 0.498 | 0.00E+00 |
| VCAM1    | FC | 41.10% | 13.00% | 0.485 | 0.00E+00 |
| GJA1     | FC | 59.50% | 20.70% | 0.483 | 0.00E+00 |
| AHNAK    | FC | 92.30% | 78.10% | 0.481 | 0.00E+00 |
| SEPW1    | FC | 92.40% | 74.00% | 0.481 | 0.00E+00 |
| POLR2L   | FC | 96.10% | 85.80% | 0.480 | 0.00E+00 |
| NT5E     | FC | 75.60% | 41.90% | 0.480 | 0.00E+00 |
| FAM134B  | FC | 72.70% | 40.10% | 0.475 | 0.00E+00 |
| COL14A1  | FC | 25.50% | 5.50%  | 0.473 | 0.00E+00 |
| ABHD2    | FC | 54.10% | 20.00% | 0.467 | 0.00E+00 |
| ANKH     | FC | 87.60% | 70.00% | 0.466 | 0.00E+00 |
| CERCAM   | FC | 49.50% | 17.20% | 0.466 | 0.00E+00 |
| TCF4     | FC | 80.60% | 54.20% | 0.456 | 0.00E+00 |
| SERPINF1 | FC | 15.60% | 1.10%  | 0.456 | 0.00E+00 |
| PMP22    | FC | 97.00% | 87.60% | 0.452 | 0.00E+00 |
| TMEM100  | FC | 48.90% | 13.60% | 0.449 | 0.00E+00 |
| HCFC1R1  | FC | 84.00% | 58.20% | 0.448 | 0.00E+00 |
| CD68     | FC | 69.00% | 36.80% | 0.446 | 0.00E+00 |
| RPS27L   | FC | 96.60% | 88.70% | 0.443 | 0.00E+00 |
| NDUFB2   | FC | 94.30% | 79.90% | 0.442 | 0.00E+00 |
| MT-ND2   | FC | 94.50% | 95.10% | 0.441 | 0.00E+00 |
| NDUFS8   | FC | 68.80% | 40.10% | 0.440 | 0.00E+00 |
| THBS3    | FC | 65.50% | 27.60% | 0.440 | 0.00E+00 |

|           |    |         |        |       |          |
|-----------|----|---------|--------|-------|----------|
| BLOC1S1   | FC | 66.60%  | 34.20% | 0.437 | 0.00E+00 |
| P4HA3     | FC | 52.30%  | 12.50% | 0.432 | 0.00E+00 |
| TMEM50A   | FC | 77.20%  | 50.30% | 0.431 | 0.00E+00 |
| MRC2      | FC | 76.10%  | 47.90% | 0.418 | 0.00E+00 |
| COL4A2    | FC | 19.70%  | 1.50%  | 0.412 | 0.00E+00 |
| LTBP2     | FC | 62.30%  | 32.90% | 0.411 | 0.00E+00 |
| MAP1A     | FC | 43.10%  | 8.20%  | 0.410 | 0.00E+00 |
| C10orf105 | FC | 49.60%  | 14.70% | 0.406 | 0.00E+00 |
| CD109     | FC | 68.50%  | 39.60% | 0.399 | 0.00E+00 |
| DPYSL2    | FC | 61.90%  | 29.60% | 0.398 | 0.00E+00 |
| FNIP2     | FC | 60.60%  | 33.60% | 0.392 | 0.00E+00 |
| AKR1C2    | FC | 69.80%  | 40.00% | 0.392 | 0.00E+00 |
| NDUFS5    | FC | 95.30%  | 88.50% | 0.387 | 0.00E+00 |
| F5        | FC | 44.20%  | 10.60% | 0.380 | 0.00E+00 |
| CNIH1     | FC | 83.20%  | 63.50% | 0.380 | 0.00E+00 |
| SORBS2    | FC | 43.90%  | 13.90% | 0.378 | 0.00E+00 |
| LTBP3     | FC | 71.20%  | 46.70% | 0.377 | 0.00E+00 |
| RAB31     | FC | 41.20%  | 11.60% | 0.375 | 0.00E+00 |
| PLEC      | FC | 56.10%  | 28.40% | 0.375 | 0.00E+00 |
| EZR       | FC | 44.30%  | 17.60% | 0.366 | 0.00E+00 |
| GPNMB     | FC | 19.30%  | 1.30%  | 0.366 | 0.00E+00 |
| ACKR3     | FC | 44.40%  | 18.00% | 0.357 | 0.00E+00 |
| COX7B     | FC | 92.70%  | 80.00% | 0.355 | 0.00E+00 |
| ABL2      | FC | 43.70%  | 17.50% | 0.348 | 0.00E+00 |
| RPL28     | FC | 99.90%  | 99.90% | 0.348 | 0.00E+00 |
| HMGB1     | FC | 98.50%  | 96.00% | 0.348 | 0.00E+00 |
| ZEB2      | FC | 33.70%  | 2.30%  | 0.347 | 0.00E+00 |
| MGST1     | FC | 30.70%  | 6.10%  | 0.344 | 0.00E+00 |
| CD63      | FC | 100.00% | 99.70% | 0.343 | 0.00E+00 |
| SEMA3C    | FC | 32.00%  | 6.50%  | 0.341 | 0.00E+00 |
| CDH13     | FC | 32.50%  | 5.00%  | 0.331 | 0.00E+00 |
| ENG       | FC | 53.80%  | 25.50% | 0.331 | 0.00E+00 |
| COL18A1   | FC | 20.50%  | 3.00%  | 0.329 | 0.00E+00 |
| NDUFA11   | FC | 96.60%  | 87.80% | 0.326 | 0.00E+00 |
| COX6B1    | FC | 96.90%  | 89.40% | 0.325 | 0.00E+00 |
| PHACTR2   | FC | 49.90%  | 21.90% | 0.308 | 0.00E+00 |
| TAX1BP3   | FC | 47.30%  | 20.80% | 0.305 | 0.00E+00 |
| MAMDC2    | FC | 32.20%  | 3.10%  | 0.302 | 0.00E+00 |
| PTPRD     | FC | 47.50%  | 17.70% | 0.299 | 0.00E+00 |
| COX4I1    | FC | 98.40%  | 94.90% | 0.299 | 0.00E+00 |
| TNS1      | FC | 50.40%  | 23.60% | 0.298 | 0.00E+00 |

|            |    |         |         |       |           |
|------------|----|---------|---------|-------|-----------|
| ANTXR1     | FC | 43.50%  | 18.30%  | 0.296 | 0.00E+00  |
| PDGFRB     | FC | 26.00%  | 6.70%   | 0.293 | 0.00E+00  |
| KCNN4      | FC | 29.80%  | 6.00%   | 0.291 | 0.00E+00  |
| ANGPTL1    | FC | 32.90%  | 9.30%   | 0.287 | 0.00E+00  |
| SSC5D      | FC | 39.70%  | 13.00%  | 0.286 | 0.00E+00  |
| SULF1      | FC | 37.40%  | 10.60%  | 0.286 | 0.00E+00  |
| COL8A1     | FC | 16.80%  | 2.10%   | 0.285 | 0.00E+00  |
| ANPEP      | FC | 23.60%  | 0.80%   | 0.281 | 0.00E+00  |
| S100A3     | FC | 33.90%  | 11.50%  | 0.267 | 0.00E+00  |
| OAZ1       | FC | 99.70%  | 99.30%  | 0.266 | 0.00E+00  |
| DYSF       | FC | 26.90%  | 7.40%   | 0.266 | 0.00E+00  |
| ITGB8      | FC | 31.30%  | 9.60%   | 0.257 | 0.00E+00  |
| PXDN       | FC | 44.30%  | 18.70%  | 0.256 | 0.00E+00  |
| ODF3B      | FC | 38.90%  | 10.80%  | 0.251 | 0.00E+00  |
| PDLIM1     | FC | 19.50%  | 4.10%   | 0.327 | 3.87E-303 |
| LTBP1      | FC | 59.70%  | 34.20%  | 0.430 | 1.23E-302 |
| NRP2       | FC | 55.20%  | 27.70%  | 0.323 | 2.44E-302 |
| MVP        | FC | 57.30%  | 31.10%  | 0.313 | 5.16E-297 |
| AKR1C1     | FC | 34.00%  | 12.10%  | 0.332 | 3.55E-296 |
| CUX1       | FC | 55.00%  | 28.30%  | 0.269 | 1.22E-295 |
| ATP6V0E1   | FC | 94.80%  | 84.40%  | 0.330 | 3.60E-295 |
| DNAJC15    | FC | 74.40%  | 50.70%  | 0.325 | 2.22E-294 |
| DEFB1      | FC | 20.10%  | 4.50%   | 0.434 | 3.69E-294 |
| VIM        | FC | 100.00% | 100.00% | 0.456 | 5.14E-291 |
| AXL        | FC | 52.00%  | 26.00%  | 0.328 | 4.33E-289 |
| UQCQRQ     | FC | 95.40%  | 86.80%  | 0.316 | 1.04E-288 |
| NTN4       | FC | 40.70%  | 16.70%  | 0.263 | 3.26E-282 |
| RPS26      | FC | 99.50%  | 97.70%  | 0.409 | 5.58E-282 |
| GADD45GIP1 | FC | 89.50%  | 75.10%  | 0.315 | 7.29E-282 |
| NAV1       | FC | 44.70%  | 20.50%  | 0.258 | 3.08E-279 |
| C10orf54   | FC | 69.50%  | 44.60%  | 0.347 | 3.04E-278 |
| ATL3       | FC | 46.20%  | 21.70%  | 0.263 | 4.15E-278 |
| CD81       | FC | 75.10%  | 52.80%  | 0.423 | 6.45E-278 |
| ZNHIT1     | FC | 83.40%  | 65.70%  | 0.334 | 1.85E-276 |
| HSPG2      | FC | 59.10%  | 33.70%  | 0.372 | 3.45E-275 |
| RABAC1     | FC | 99.40%  | 95.30%  | 0.340 | 9.15E-273 |
| HHIP       | FC | 20.50%  | 5.00%   | 0.268 | 2.83E-272 |
| RAB13      | FC | 87.80%  | 73.00%  | 0.345 | 1.51E-270 |
| COX5B      | FC | 96.80%  | 91.20%  | 0.285 | 5.39E-269 |
| PDGFRA     | FC | 48.60%  | 24.10%  | 0.319 | 1.20E-268 |
| AK1        | FC | 94.20%  | 84.00%  | 0.410 | 2.54E-267 |

|          |    |        |        |       |             |
|----------|----|--------|--------|-------|-------------|
| NDUFS6   | FC | 80.90% | 61.70% | 0.328 | 1.80E-266   |
| NOP10    | FC | 87.00% | 71.40% | 0.326 | 3.04E-266   |
| ADAMTS1  | FC | 38.10% | 15.80% | 0.447 | 1.49E-265   |
| SLC7A2   | FC | 56.30% | 32.70% | 0.456 | 1.53E-265   |
| FXVD5    | FC | 97.60% | 93.30% | 0.316 | 1.52E-263   |
| IFI27    | FC | 31.70% | 11.70% | 0.575 | 5.79E-263   |
| ATP5J2   | FC | 88.90% | 74.50% | 0.345 | 2.30E-261   |
| PFKP     | FC | 83.30% | 64.80% | 0.400 | 2.41E-261   |
| POSTN    | FC | 18.00% | 3.90%  | 0.599 | 6.38E-261   |
| IFITM2   | FC | 94.00% | 80.20% | 0.357 | 8.29E-261   |
| AP2S1    | FC | 78.50% | 59.70% | 0.348 | 1.70E-257   |
| IGFBP5   | FC | 41.70% | 18.80% | 0.724 | 1.43E-253   |
| CYBA     | FC | 81.00% | 64.40% | 0.406 | 5.85E-253   |
| ANKRD28  | FC | 66.10% | 41.40% | 0.325 | 8.27E-252   |
| SIGIRR   | FC | 50.40% | 25.90% | 0.253 | 9.31E-252   |
| HIGD2A   | FC | 64.00% | 40.10% | 0.293 | 2.2994E-250 |
| APRT     | FC | 75.00% | 54.20% | 0.335 | 2.8629E-250 |
| TMSB10   | FC | 87.60% | 75.70% | 0.984 | 4.0055E-249 |
| ARPC3    | FC | 93.30% | 82.80% | 0.307 | 9.409E-249  |
| PSMA7    | FC | 94.10% | 85.80% | 0.357 | 6.6333E-248 |
| ACTA2    | FC | 11.50% | 1.60%  | 1.053 | 2.1573E-245 |
| ITGB1    | FC | 88.10% | 75.00% | 0.409 | 4.7927E-245 |
| RBX1     | FC | 88.50% | 74.90% | 0.319 | 9.0451E-245 |
| GPX1     | FC | 87.40% | 74.00% | 0.365 | 3.4611E-244 |
| MYL12B   | FC | 94.10% | 87.00% | 0.367 | 3.7991E-244 |
| DSTN     | FC | 99.80% | 99.00% | 0.317 | 8.2799E-244 |
| REXO2    | FC | 93.60% | 84.70% | 0.318 | 3.6346E-243 |
| ATP5H    | FC | 90.80% | 78.50% | 0.287 | 3.219E-241  |
| PTMA     | FC | 99.90% | 99.90% | 0.280 | 2.6406E-240 |
| ATP6AP2  | FC | 78.80% | 60.00% | 0.333 | 1.8974E-237 |
| PSD3     | FC | 62.90% | 39.50% | 0.290 | 5.6642E-236 |
| NDUFA13  | FC | 87.50% | 71.50% | 0.294 | 1.6852E-235 |
| GYPC     | FC | 58.60% | 35.30% | 0.304 | 1.4346E-234 |
| FKBP1A   | FC | 75.80% | 56.90% | 0.358 | 1.1672E-233 |
| SLC39A14 | FC | 83.30% | 71.10% | 0.393 | 2.3647E-231 |
| OGN      | FC | 94.30% | 77.80% | 0.342 | 4.9679E-231 |
| CSTB     | FC | 92.80% | 81.00% | 0.356 | 3.0936E-230 |
| IGFBP7   | FC | 79.70% | 53.80% | 0.561 | 1.8771E-228 |
| C1R      | FC | 81.30% | 63.40% | 0.609 | 2.3967E-228 |
| LTBP4    | FC | 58.60% | 35.10% | 0.273 | 1.3248E-224 |
| DYNLL1   | FC | 97.80% | 93.80% | 0.295 | 4.8556E-224 |

|         |    |        |        |       |             |
|---------|----|--------|--------|-------|-------------|
| ARPC5   | FC | 75.90% | 56.80% | 0.337 | 1.9425E-223 |
| TCEB2   | FC | 97.50% | 92.50% | 0.277 | 3.3513E-219 |
| MYH9    | FC | 40.90% | 20.10% | 0.313 | 9.1562E-219 |
| YWHAB   | FC | 81.00% | 64.70% | 0.307 | 2.3685E-218 |
| LMAN1   | FC | 75.60% | 55.90% | 0.296 | 2.4376E-218 |
| PDLIM3  | FC | 43.50% | 21.30% | 0.298 | 9.9579E-218 |
| IGF1    | FC | 11.60% | 1.90%  | 0.494 | 8.3089E-215 |
| PRDX1   | FC | 98.10% | 95.10% | 0.366 | 4.9405E-212 |
| PART1   | FC | 62.70% | 39.70% | 0.397 | 1.7648E-210 |
| FLNA    | FC | 49.00% | 27.80% | 0.434 | 2.8678E-209 |
| SPTBN1  | FC | 51.30% | 29.60% | 0.276 | 6.4566E-207 |
| ANXA4   | FC | 71.20% | 51.70% | 0.366 | 2.9558E-206 |
| AKR1B1  | FC | 59.50% | 37.80% | 0.302 | 4.5637E-206 |
| LAMB2   | FC | 67.00% | 44.90% | 0.283 | 4.6259E-206 |
| PLTP    | FC | 30.30% | 12.40% | 0.269 | 7.8301E-206 |
| CIB1    | FC | 84.00% | 71.40% | 0.321 | 4.603E-205  |
| TIMP1   | FC | 99.80% | 99.40% | 0.606 | 1.7529E-204 |
| APLP2   | FC | 85.90% | 72.20% | 0.296 | 2.5065E-202 |
| PCOLCE  | FC | 90.80% | 80.20% | 0.504 | 4.98E-200   |
| MPG     | FC | 75.10% | 54.80% | 0.261 | 1.20E-198   |
| PSMB3   | FC | 82.00% | 66.00% | 0.280 | 5.52E-198   |
| GALNT15 | FC | 67.80% | 46.30% | 0.320 | 8.22E-197   |
| SMIM14  | FC | 79.60% | 65.70% | 0.407 | 2.14E-196   |
| PSME1   | FC | 68.40% | 48.30% | 0.307 | 7.60E-196   |
| USMG5   | FC | 95.90% | 88.70% | 0.256 | 8.42E-196   |
| CST3    | FC | 99.90% | 99.60% | 0.260 | 2.95E-195   |
| GFPT2   | FC | 47.70% | 27.40% | 0.460 | 1.66E-192   |
| CAST    | FC | 73.20% | 53.70% | 0.286 | 1.74E-192   |
| C9orf16 | FC | 77.80% | 60.80% | 0.296 | 9.89E-190   |
| CAV1    | FC | 86.30% | 74.60% | 0.429 | 1.62E-188   |
| RNH1    | FC | 83.30% | 71.20% | 0.315 | 9.10E-187   |
| RAC1    | FC | 63.00% | 42.30% | 0.258 | 9.49E-187   |
| DRAP1   | FC | 79.30% | 63.30% | 0.282 | 1.30E-186   |
| ARL2    | FC | 71.90% | 54.60% | 0.357 | 5.81E-186   |
| MT-CO3  | FC | 94.60% | 95.10% | 0.390 | 8.00E-186   |
| CDON    | FC | 62.20% | 40.20% | 0.280 | 1.40E-183   |
| ATOX1   | FC | 82.90% | 66.40% | 0.265 | 1.71E-183   |
| PRELID1 | FC | 85.40% | 72.40% | 0.251 | 1.88E-183   |
| CTSA    | FC | 63.10% | 42.10% | 0.258 | 9.41E-183   |
| MRPL41  | FC | 75.50% | 58.10% | 0.267 | 1.01E-181   |
| ITGAV   | FC | 58.30% | 37.60% | 0.260 | 1.87E-181   |

|               |    |         |         |       |           |
|---------------|----|---------|---------|-------|-----------|
| UGDH          | FC | 75.20%  | 58.10%  | 0.321 | 2.43E-180 |
| NEAT1         | FC | 99.80%  | 99.50%  | 0.310 | 7.42E-180 |
| MSN           | FC | 65.90%  | 47.20%  | 0.299 | 3.26E-179 |
| CLU           | FC | 100.00% | 100.00% | 0.451 | 3.42E-179 |
| CCND2         | FC | 54.50%  | 33.80%  | 0.261 | 3.67E-179 |
| FAM127A       | FC | 80.20%  | 63.20%  | 0.257 | 4.67E-179 |
| DIXDC1        | FC | 71.30%  | 52.40%  | 0.262 | 4.43E-178 |
| TPM3          | FC | 74.30%  | 56.40%  | 0.276 | 6.13E-178 |
| MT-ND3        | FC | 93.30%  | 93.50%  | 0.371 | 3.34E-176 |
| GAS1          | FC | 62.20%  | 37.70%  | 0.307 | 4.16E-175 |
| ARL6IP5       | FC | 95.90%  | 90.90%  | 0.281 | 8.17E-174 |
| MMP14         | FC | 35.10%  | 16.80%  | 0.268 | 8.53E-174 |
| TM4SF1        | FC | 78.00%  | 58.60%  | 0.316 | 8.19E-172 |
| CD44          | FC | 80.20%  | 65.30%  | 0.364 | 2.35E-169 |
| TRPS1         | FC | 70.70%  | 51.30%  | 0.271 | 1.66E-166 |
| POMP          | FC | 91.50%  | 82.50%  | 0.265 | 3.26E-164 |
| FAM114A1      | FC | 82.10%  | 67.80%  | 0.265 | 4.13E-164 |
| RHOA          | FC | 94.10%  | 88.30%  | 0.298 | 5.09E-164 |
| YIF1A         | FC | 80.50%  | 63.90%  | 0.262 | 5.27E-164 |
| SDF2L1        | FC | 56.50%  | 36.90%  | 0.261 | 1.09E-163 |
| RP11-572C15.6 | FC | 49.00%  | 30.50%  | 0.353 | 1.43E-162 |
| FOXO1         | FC | 50.10%  | 31.30%  | 0.268 | 1.68E-162 |
| SEP15         | FC | 78.50%  | 63.40%  | 0.253 | 2.35E-162 |
| PSMD8         | FC | 80.40%  | 66.60%  | 0.251 | 1.12E-161 |
| GNG11         | FC | 68.90%  | 49.50%  | 0.328 | 4.32E-159 |
| IQGAP1        | FC | 72.20%  | 55.40%  | 0.259 | 5.32E-159 |
| NDUFB7        | FC | 91.30%  | 81.20%  | 0.251 | 5.34E-159 |
| MFAP4         | FC | 30.20%  | 14.10%  | 0.263 | 2.02E-158 |
| DST           | FC | 90.30%  | 78.30%  | 0.259 | 2.59E-158 |
| ATP5G1        | FC | 81.20%  | 67.10%  | 0.253 | 1.05E-153 |
| FBN1          | FC | 45.90%  | 27.70%  | 0.298 | 1.34E-152 |
| SERPINE2      | FC | 78.60%  | 57.30%  | 0.377 | 1.69E-152 |
| COL5A2        | FC | 81.30%  | 61.50%  | 0.399 | 4.22E-150 |
| TUBA1B        | FC | 93.90%  | 88.90%  | 0.355 | 6.01E-150 |
| IGFBP6        | FC | 82.50%  | 66.90%  | 0.545 | 1.33E-146 |
| LMNA          | FC | 97.50%  | 93.50%  | 0.344 | 1.45E-143 |
| GRN           | FC | 81.10%  | 64.10%  | 0.276 | 5.43E-142 |
| MYL9          | FC | 42.90%  | 26.70%  | 0.911 | 4.89E-139 |
| ARPC2         | FC | 92.80%  | 86.40%  | 0.270 | 2.48E-136 |
| LPP           | FC | 48.40%  | 30.30%  | 0.262 | 2.90E-133 |
| COX7A1        | FC | 90.90%  | 84.10%  | 0.259 | 2.99E-132 |

|         |    |        |        |       |           |
|---------|----|--------|--------|-------|-----------|
| MT-ND4  | FC | 95.00% | 95.50% | 0.285 | 1.62E-129 |
| EFEMP1  | FC | 67.30% | 54.10% | 0.376 | 4.38E-129 |
| PTRF    | FC | 82.80% | 72.40% | 0.361 | 2.86E-128 |
| ADIRF   | FC | 95.40% | 91.20% | 0.449 | 3.00E-127 |
| 43350   | FC | 90.20% | 82.80% | 0.269 | 8.48E-126 |
| MSMP    | FC | 15.90% | 5.50%  | 0.960 | 2.59E-122 |
| MT-ND1  | FC | 93.20% | 94.10% | 0.288 | 2.04E-116 |
| S100A16 | FC | 48.90% | 34.20% | 0.283 | 5.48E-109 |
| DDAH2   | FC | 57.90% | 42.70% | 0.257 | 7.26E-107 |
| CAPN2   | FC | 56.90% | 42.30% | 0.259 | 7.57E-104 |
| CCDC80  | FC | 90.00% | 84.80% | 0.504 | 1.13E-101 |
| FNDC1   | FC | 24.70% | 13.00% | 0.275 | 3.20E-91  |
| CDA     | FC | 46.30% | 33.40% | 0.269 | 1.43E-78  |
| CD9     | FC | 96.20% | 94.70% | 0.496 | 2.11E-73  |
| UAP1    | FC | 73.20% | 66.20% | 0.272 | 1.02E-65  |
| PPAP2A  | FC | 35.00% | 24.10% | 0.276 | 4.48E-61  |
| WISP2   | FC | 10.60% | 4.40%  | 0.409 | 2.79E-59  |
| MT1G    | FC | 82.60% | 72.30% | 0.295 | 2.88E-57  |
| ENPP1   | FC | 76.60% | 68.30% | 0.299 | 2.51E-54  |
| PTN     | FC | 30.30% | 21.10% | 0.323 | 2.39E-44  |
| RGS2    | FC | 53.80% | 44.40% | 0.312 | 1.08E-39  |
| AMTN    | FC | 15.80% | 9.60%  | 0.474 | 1.70E-31  |
| FABP3   | FC | 12.70% | 7.30%  | 0.306 | 2.76E-28  |
| INHBA   | FC | 75.10% | 67.60% | 0.251 | 4.42E-18  |
| CYP1B1  | FC | 38.40% | 35.80% | 0.344 | 1.52E-09  |
| TPM1    | FC | 34.60% | 31.80% | 0.301 | 9.67E-03  |
| CD74    | FC | 16.20% | 14.10% | 0.494 | 1.00E+00  |

**Supplementary Table S5A.** List of cytokines predicted to regulate the chondrocyte cell phenotypes.

| Upstream Regulator (cytokine) | Activation z-scores in HomC | Activation z-scores in HTC | Activation z-scores in preHTC | Activation z-scores in RepC | Activation z-scores in RegC | Activation z-scores in preFC | Activation z-scores in FC | SUM (z-score) | Expressed by chondrocytes (%) | Expressed by synoviocytes (%) | Expressed by HLA-DRA+ cells (%) |
|-------------------------------|-----------------------------|----------------------------|-------------------------------|-----------------------------|-----------------------------|------------------------------|---------------------------|---------------|-------------------------------|-------------------------------|---------------------------------|
| TNF                           | 5.733                       | 3.988                      | 2.199                         |                             | 2.53                        | 2.948                        | 3.923                     | 21.321        | Not detected                  | 16.16                         | 60.26                           |
| IL6                           | 4.952                       | 3.256                      |                               |                             | 3.425                       | 2.706                        | 3.929                     | 18.268        | Not detected                  | 36.17                         | 25.44                           |
| IL1B                          | 5.738                       | 2.338                      |                               |                             | 2.667                       | 2.488                        | 3.778                     | 17.009        | Not detected                  | 24.44                         | 61.88                           |
| IL1A                          | 3.513                       | 2.756                      |                               |                             | 2.406                       | 2.626                        | 3.514                     | 14.815        | Not detected                  | 4.74                          | 29.91                           |
| EDN1                          | 3.279                       | 2.6                        | 2.19                          |                             |                             | 2.6                          | 4.058                     | 14.727        | Not detected                  | 1.93                          | 1.98                            |
| OSM                           | 3.551                       | 3.172                      | 2.372                         |                             | 2.442                       | 2.329                        |                           | 13.866        | Not detected                  | 3.17                          | 17.38                           |
| PRL                           | 2.423                       |                            |                               | 2.216                       | 2.131                       | 2.034                        | 4.504                     | 13.308        | Not detected                  | 0.11                          | 0.00                            |
| IFNG                          | 5.684                       | 2.597                      |                               |                             |                             | 2.585                        | 2.31                      | 13.176        | Not detected                  | 0.22                          | 0.22                            |
| IL4                           | 2.298                       | 2.605                      |                               |                             |                             | 2.877                        | 4.976                     | 12.756        | Not detected                  | 0.20                          | 0.15                            |
| IL5                           | 2.619                       | 2.8                        |                               |                             |                             | 2.985                        | 4                         | 12.404        | Not detected                  | 0.16                          | 0.00                            |
| TNFSF11                       | 2.522                       | 2.214                      |                               | 2.219                       |                             | 2.95                         | 2.395                     | 12.3          | 9.87                          | 2.83                          | 0.59                            |
| CSF2                          | 3.475                       | 2.5                        |                               |                             | 2.216                       |                              | 2.742                     | 10.933        | Not detected                  | 0.73                          | 1.98                            |
| CSF1                          | 2.42                        | 2.916                      | 2.352                         |                             |                             |                              | 3.087                     | 10.775        | 7.81                          | 29.09                         | 6.38                            |
| IFNA2                         | 3.217                       | 2.403                      |                               |                             | 2.828                       |                              | 2.168                     | 10.616        | Not detected                  | Not detected                  | Not detected                    |
| IL3                           | 2.271                       | 2.391                      | 2.188                         |                             |                             |                              | 2.433                     | 9.283         | Not detected                  | Not detected                  | Not detected                    |
| CXCL12                        | 3.179                       | 2.573                      |                               |                             |                             |                              | 3.242                     | 8.994         | Not detected                  | 47.13                         | 14.74                           |
| IL17A                         | 3.389                       |                            |                               |                             | 2.649                       |                              | 2.157                     | 8.195         | Not detected                  | Not detected                  | Not detected                    |
| IL2                           | 3.502                       |                            |                               |                             | 2.189                       | 2.449                        |                           | 8.14          | Not detected                  | 0.03                          | 0.00                            |
| IL15                          |                             |                            |                               |                             | 2.429                       | 2.438                        | 2.97                      | 7.837         | Not detected                  | 4.72                          | 8.43                            |
| WNT1                          |                             |                            |                               | 2.207                       |                             | 2.18                         | 2.876                     | 7.263         | Not detected                  | Not detected                  | Not detected                    |
| CD40LG                        | 2.243                       | 2.593                      | 2.2                           |                             |                             |                              |                           | 7.036         | Not detected                  | 0.24                          | 0.22                            |
| IL18                          | 3.027                       | 2.449                      |                               |                             |                             |                              |                           | 5.476         | Not detected                  | 5.34                          | 35.56                           |
| EPO                           | 2.784                       | 2.401                      |                               |                             |                             |                              |                           | 5.185         | Not detected                  | 0.05                          | 0.07                            |
| LIF                           | 3.105                       | 2.053                      |                               |                             |                             |                              |                           | 5.158         | 8.09                          | 14.17                         | 4.91                            |
| IL13                          |                             | 2.327                      |                               |                             |                             |                              | 2.284                     | 4.611         | Not detected                  | 0.09                          | 0.00                            |
| C5                            | 2.155                       | 2                          |                               |                             |                             |                              |                           | 4.155         | Not detected                  | 1.45                          | 1.17                            |
| IL27                          | 2.313                       |                            |                               |                             |                             |                              |                           | 2.313         | Not detected                  | 0.08                          | 0.37                            |
| CCL5                          |                             |                            |                               |                             |                             |                              | 2.236                     | 2.236         | Not detected                  | 2.84                          | 4.91                            |
| SPP1                          |                             |                            |                               |                             |                             |                              | 2.225                     | 2.225         | 35.34                         | 9.70                          | 12.98                           |
| TNFSF13B                      | 2.219                       |                            |                               |                             |                             |                              |                           | 2.219         | Not detected                  | 9.66                          | 31.89                           |
| IL11                          |                             |                            | 2                             |                             |                             |                              |                           | 2             | 6.53                          | 7.27                          | 2.86                            |

The activation z-score determined by IPA representing the likelihood of the predicted transcriptional regulator to activate the downstream gene expression



**Supplementary Table S5B.** List of growth factors predicted to regulate the chondrocyte cell phenotypes.

| Upstream Regulator (cytokine) | Activation z-scores in HomC | Activation z-scores in HTC | Activation z-scores in preHTC | Activation z-scores in RepC | Activation z-scores in RegC | Activation z-scores in preFC | Activation z-scores in FC | SUM (z-score) | Expressed by chondrocytes (%) | Expressed by synoviocytes (%) | Expressed by HLA-DRA+ cells (%) |
|-------------------------------|-----------------------------|----------------------------|-------------------------------|-----------------------------|-----------------------------|------------------------------|---------------------------|---------------|-------------------------------|-------------------------------|---------------------------------|
| TGFB1                         | 3.732                       | 3.433                      | 3.601                         | 2.526                       |                             | 6.42                         | 7.36                      | 27.072        | 46.54                         | 43.62                         | 50.29                           |
| EGF                           | 4.346                       | 4.751                      | 3.665                         |                             | 2.798                       | 3.121                        | 3.928                     | 22.609        | Not detected                  | 0.45                          | 0.15                            |
| AGT                           | 3.154                       | 3.585                      | 2.584                         | 2.188                       | 2.231                       | 2.974                        | 4.228                     | 20.944        | 26.54                         | 4.46                          | 0.59                            |
| IGF1                          | 3.42                        | 4.252                      | 3.762                         |                             | 2.037                       | 3.64                         | 3.204                     | 20.315        | Not detected                  | 42.34                         | 18.77                           |
| TGFB3                         | 2.771                       | 3.092                      | 2.611                         | 2.366                       |                             | 3.381                        | 3.398                     | 17.619        | 14.87                         | 18.10                         | 2.49                            |
| GDF2                          | 2.151                       | 2.449                      | 2.63                          | 2.166                       |                             | 2.74                         | 3.426                     | 15.562        | Not detected                  | Not detected                  | Not detected                    |
| FGF2                          | 3.249                       | 3.926                      | 3.063                         |                             |                             | 2.811                        | 2.482                     | 15.531        | 48.74                         | 14.82                         | 1.47                            |
| BMP2                          | 3.073                       | 3.791                      | 3.398                         | 2.386                       |                             | 2.288                        |                           | 14.936        | 33.34                         | 17.03                         | 3.96                            |
| VEGFA                         | 3.206                       | 2.507                      | 2.777                         |                             | 2.563                       |                              | 3.548                     | 14.601        | 43.71                         | 22.58                         | 27.79                           |
| BMP4                          | 3.177                       | 3.066                      | 2.378                         | 2.183                       |                             | 2.183                        |                           | 12.987        | 5.19                          | 25.07                         | 2.57                            |
| HGF                           | 2.819                       | 3.645                      | 2.608                         |                             |                             |                              | 2.31                      | 11.382        | Not detected                  | 6.54                          | 5.13                            |
| NRG1                          | 2.461                       | 2.215                      | 2.195                         |                             |                             |                              | 3.105                     | 9.976         | Not detected                  | 0.07                          | 0.15                            |
| ANGPT2                        | 2.718                       |                            |                               |                             |                             | 2.95                         | 3.652                     | 9.32          | Not detected                  | 6.20                          | 1.17                            |
| CTGF                          |                             |                            |                               | 2.208                       |                             | 2.21                         | 3.09                      | 7.508         | 97.66                         | 74.99                         | 20.60                           |
| KITLG                         | 2.61                        | 2.414                      | 2.201                         |                             |                             |                              |                           | 7.225         | 8.93                          | 14.23                         | 4.18                            |
| LEP                           | 3.095                       |                            |                               |                             |                             |                              | 3.243                     | 6.338         | Not detected                  | 0.09                          | 0.07                            |
| TGFB2                         |                             |                            |                               |                             |                             | 2.443                        | 2.876                     | 5.319         | 9.44                          | 13.71                         | 5.28                            |
| NGF                           | 2.879                       | 2.189                      |                               |                             |                             |                              |                           | 5.068         | 23.58                         | 8.64                          | 0.88                            |
| GH1                           | 2.213                       | 2.368                      |                               |                             |                             |                              |                           | 4.581         | Not detected                  | 0.23                          | 0.00                            |
| PDGFC                         |                             |                            |                               |                             |                             |                              | 2.78                      | 2.78          | 19.52                         | 18.01                         | 13.42                           |
| PDGFB                         | 2.602                       |                            |                               |                             |                             |                              |                           | 2.602         | Not detected                  | 4.81                          | 27.27                           |
| FGF10                         |                             |                            |                               |                             |                             |                              | 2.425                     | 2.425         | Not detected                  | 27.71                         | 3.74                            |
| FGF7                          |                             |                            |                               |                             |                             |                              | 2.236                     | 2.236         | 5.42                          | 17.64                         | 2.13                            |
| INHBB                         |                             |                            |                               |                             |                             | 2.213                        |                           | 2.213         | Not detected                  | 2.06                          | 0.51                            |
| BMP6                          |                             |                            |                               |                             |                             | 2.207                        |                           | 2.207         | Not detected                  | 6.95                          | 0.95                            |
| FGF8                          |                             |                            |                               |                             |                             |                              | 2.177                     | 2.177         | Not detected                  | 0.08                          | 0.00                            |
| IGF2                          |                             |                            |                               |                             |                             | 2.176                        |                           | 2.176         | 29.51                         | 3.90                          | 0.73                            |
| GDF9                          |                             |                            |                               |                             |                             |                              | 2.117                     | 2.117         | Not detected                  | 0.99                          | 0.95                            |
| BDNF                          |                             | 2.103                      |                               |                             |                             |                              |                           | 2.103         | Not detected                  | 3.32                          | 0.29                            |
| FGF1                          |                             |                            | 2.088                         |                             |                             |                              |                           | 2.088         | 46.03                         | 1.42                          | 0.15                            |

The activation z-score determined by IPA representing the likelihood of the predicted transcriptional regulator to activate the downstream gene expression

**Supplementary Table S6.** List of OA-related regulators in osteoarthritic synoviocytes and chondrocytes.

|                  | <b>SY</b>             | <b>SY</b>                 | <b>OLT</b>            | <b>MT</b>             | <b>CHONDRO</b>            |
|------------------|-----------------------|---------------------------|-----------------------|-----------------------|---------------------------|
| <b>Gene</b>      | <b>avg expression</b> | <b>% cells expressing</b> | <b>avg expression</b> | <b>avg expression</b> | <b>% cells expressing</b> |
| <b>CYTOKINES</b> |                       |                           |                       |                       |                           |
| TNF              | 0.85755126            | 16.16                     | 0.00158187            | 0.03766949            | < 1%                      |
| IL6              | 1.77934731            | 36.17                     | 0.01119925            | 0.07079241            | < 1%                      |
| IL1B             | 7.22218732            | 24.44                     | 0.0010367             | 0.02481688            | < 1%                      |
| IL1A             | 0.20739783            | 4.74                      | Not detected          | Not detected          | < 1%                      |
| EDN1             | 0.08942337            | 1.93                      | 0.00094584            | 0.05532706            | < 1%                      |
| OSM              | 0.11960387            | 3.17                      | 0.0003565             | 0.00888218            | < 1%                      |
| PRL              | 0.00169112            | < 1%                      | 0.00109393            | 0.00138929            | < 1%                      |
| IFNG             | 0.02400214            | < 1%                      | 0.00060181            | 0.00016810            | < 1%                      |
| IL4              | 0.0010907             | < 1%                      | 0.00207364            | 0.00186238            | < 1%                      |
| IL5              | 0.11254458            | < 1%                      | Not detected          | 0.00046291            | < 1%                      |
| TNFSF11          | 0.02624252            | 2.83                      | 0.03435381            | 0.23667652            | 9.87                      |
| CSF2             | 0.12217304            | < 1%                      | Not detected          | Not detected          | < 1%                      |
| CSF1             | 0.55304604            | 29.09                     | 0.08907942            | 0.12565541            | 7.81                      |
| IFNA2            | Not detected          | < 1%                      | Not detected          | Not detected          | < 1%                      |
| IL3              | Not detected          | < 1%                      | Not detected          | Not detected          | < 1%                      |
| CXCL12           | 2.56053784            | 47.13                     | 0.00396949            | 0.24792134            | < 1%                      |
| IL17A            | Not detected          | < 1%                      | Not detected          | Not detected          | < 1%                      |
| IL2              | 0.00388308            | < 1%                      | Not detected          | Not detected          | < 1%                      |
| IL15             | 0.06608152            | 4.72                      | 0.00567904            | 0.01085935            | < 1%                      |
| WNT1             | Not detected          | < 1%                      | Not detected          | 0.00035611            | < 1%                      |
| CD40LG           | 0.01879786            | < 1%                      | 0.00032335            | Not detected          | < 1%                      |
| IL18             | 0.14333699            | 5.34                      | 0.00162556            | 0.03775048            | < 1%                      |
| EPO              | 0.00059691            | < 1%                      | 0.00358862            | 0.00232851            | < 1%                      |
| LIF              | 0.48357187            | 14.17                     | 0.20934401            | 0.15121719            | 8.09                      |
| IL13             | 0.01519629            | < 1%                      | 0.00054818            | 0.00020048            | < 1%                      |
| C5               | 0.01577531            | 1.45                      | 0.02840462            | 0.02542117            | < 1%                      |
| IL27             | 0.00062502            | < 1%                      | Not detected          | Not detected          | < 1%                      |
| CCL5             | 0.67710738            | 2.84                      | 0.01202828            | 0.01702966            | < 1%                      |

|                            |              |       |              |              |       |
|----------------------------|--------------|-------|--------------|--------------|-------|
| SPP1                       | 0.70833395   | 9.70  | 13.8545432   | 26.41631276  | 35.34 |
| TNFSF13B                   | 0.16009459   | 9.66  | 0.03461985   | 0.02889442   | < 1%  |
| IL11                       | 0.21164188   | 7.27  | 0.00392056   | 2.60355190   | 6.53  |
| <b>GROWTH FACTORS</b>      |              |       |              |              |       |
| TGFB1                      | 0.85413248   | 43.62 | 0.64097183   | 0.76153085   | 46.54 |
| EGF                        | 0.0050613    | < 1%  | 0.00124841   | 0.00121434   | < 1%  |
| AGT                        | 0.14546452   | 4.46  | 0.28149366   | 0.22654131   | 26.54 |
| IGF1                       | 2.31677832   | 42.34 | 0.04392524   | 0.21918110   | < 1%  |
| TGFB3                      | 0.17344237   | 18.10 | 0.12960505   | 0.16154326   | 14.87 |
| GDF2                       | Not detected | < 1%  | Not detected | Not detected | < 1%  |
| FGF2                       | 0.23692075   | 14.82 | 0.57439937   | 0.75613763   | 48.74 |
| BMP2                       | 0.47167904   | 17.03 | 0.45676802   | 0.53301685   | 33.34 |
| VEGFA                      | 0.40352567   | 22.58 | 0.58457432   | 0.51546246   | 43.71 |
| BMP4                       | 0.31115601   | 25.07 | 0.04071335   | 0.09364109   | 5.19  |
| HGF                        | 0.07877636   | 6.54  | 0.00077658   | 0.00950491   | < 1%  |
| NRG1                       | 0.00086273   | < 1%  | 0.00062108   | 0.00021699   | < 1%  |
| ANGPT2                     | 0.30437288   | 6.20  | 0.02917789   | 0.14393222   | < 1%  |
| CTGF                       | 4.91512698   | 74.99 | 18.684124    | 18.54246749  | 97.66 |
| KITLG                      | 0.16979471   | 14.23 | 0.09307919   | 0.07805551   | 8.93  |
| LEP                        | 0.00091981   | < 1%  | 0.0003673    | 0.00021697   | < 1%  |
| TGFB2                      | 0.12556261   | 13.71 | 0.07757924   | 0.11088658   | 9.44  |
| NGF                        | 0.1631364    | 8.64  | 0.05681832   | 0.71832369   | 23.58 |
| GH1                        | 0.00213602   | < 1%  | 0.01320848   | 0.00505116   | < 1%  |
| PDGFC                      | 0.20191683   | 18.01 | 0.13129045   | 0.25070483   | 19.52 |
| PDGFB                      | 0.1137311    | 4.81  | Not detected | 0.03299134   | < 1%  |
| FGF10                      | 0.32961021   | 27.71 | 0.00214966   | 0.01758111   | < 1%  |
| FGF7                       | 0.30732014   | 17.64 | 0.09392485   | 0.12079376   | 5.42  |
| INHBB                      | 0.02378681   | 2.06  | 0.00060804   | 0.00980327   | < 1%  |
| BMP6                       | 0.07168878   | 6.95  | 0.01382435   | 0.06153321   | < 1%  |
| FGF8                       | 0.00031855   | < 1%  | 0.00031342   | 0.00007784   | < 1%  |
| IGF2                       | 0.17133688   | 3.90  | 0.42811444   | 0.68274656   | 29.51 |
| GDF9                       | 0.01079508   | < 1%  | 0.00358594   | 0.00155076   | < 1%  |
| BDNF                       | 0.02433709   | 3.32  | 0.00827004   | 0.02062711   | < 1%  |
| FGF1                       | 0.01640977   | 1.42  | 0.53699795   | 0.80027638   | 46.03 |
| <b>PROTEASES and OTHER</b> |              |       |              |              |       |
| ADAM8                      | 0.08625243   | 2.49  | 0.00529755   | 0.01958402   | < 1%  |
| ADAM12                     | 0.16411192   | 8.35  | 0.03152764   | 0.27939445   | 12.05 |
| ADAM14                     | Not detected | < 1%  | Not detected | Not detected | < 1%  |
| ADAM15                     | 0.52027929   | 31.09 | 0.1350985    | 0.31266840   | 18.37 |

|          |              |       |              |              |       |
|----------|--------------|-------|--------------|--------------|-------|
| ADAM16   | Not detected | < 1%  | Not detected | Not detected | < 1%  |
| ADAM17   | 0.43070682   | 28.66 | 0.1910278    | 0.17827930   | 18.43 |
| ADAMTS1  | 1.2399157    | 43.04 | 0.22650991   | 0.73930483   | 19.21 |
| ADAMTS4  | 0.39328888   | 11.53 | 0.00193909   | 0.07353123   | < 1%  |
| ADAMTS5  | 0.41241595   | 21.58 | 0.08477879   | 0.37566779   | 13.92 |
| ADAMTS8  | 0.00199743   | < 1%  | Not detected | Not detected | < 1%  |
| ADAMTS9  | 0.23975834   | 5.78  | 0.01049355   | 0.09333423   | < 1%  |
| ADAMTS14 | 0.00547353   | < 1%  | 0.00095825   | 0.01041145   | < 1%  |
| ADAMTS15 | 0.00820091   | < 1%  | 0.00018986   | 0.00147547   | < 1%  |
| ADAMTS16 | 0.02716274   | 2.83  | 0.00030659   | 0.00242930   | < 1%  |
| ADAMTS17 | 0.01571554   | 2.20  | 0.00329598   | 0.00998285   | < 1%  |
| ADAMTS18 | 0.00330092   | < 1%  | 0.00066559   | 0.00533063   | < 1%  |
| MMP1     | 0.114642     | 2.50  | 0.01584109   | 0.00481755   | < 1%  |
| MMP2     | 2.28396669   | 60.55 | 0.08560122   | 0.47811906   | 6.71  |
| MMP3     | 4.00612688   | 24.80 | 9.9199593    | 1.54325759   | 54.17 |
| MMP8     | Not detected | < 1%  | Not detected | Not detected | < 1%  |
| MMP9     | 0.18145261   | 5.47  | 0.00125271   | 0.06618949   | < 1%  |
| MMP13    | 0.008894     | < 1%  | 0.01022954   | 0.02066082   | < 1%  |
| MMP14    | 0.6032863    | 42.91 | 0.17960964   | 0.45239280   | 19.63 |
| MMP15    | 0.00499547   | <1%   | 0.00134058   | 0.00949421   | <1%   |
| MMP28    | 0.06100635   | 5.65  | 0.0004565    | 0.04523445   | < 1%  |
| ST14     | 0.02919843   | 2.23  | 0.00056512   | 0.00533437   | < 1%  |
| HTRA1    | 15.0445909   | 82.69 | 3.90133863   | 18.52409127  | 81.04 |
| PLAU     | 0.84355472   | 34.95 | 0.00337354   | 0.12279485   | < 1%  |
| PLAT     | 0.26190368   | 14.99 | 0.0193858    | 0.09334085   | 5.39  |
| CTSB     | 3.01391492   | 81.27 | 1.97312545   | 2.94204175   | 84.55 |
| CTSD     | 2.80470779   | 80.41 | 3.21696629   | 3.47605726   | 91.54 |
| CTSK     | 1.42171921   | 69.45 | 1.2512625    | 1.17190347   | 70.22 |
| CTSS     | 1.16643153   | 32.34 | 0.06283827   | 0.35204916   | 6.53  |
| APC      | 0.18076037   | 16.47 | 0.09655517   | 0.11971038   | 12.58 |
| SERPINA1 | 0.38305545   | 13.84 | 35.8982598   | 19.91700017  | 96.16 |
| TIMP1    | 16.6057286   | 96.52 | 19.6269541   | 26.46097394  | 99.47 |
| TIMP2    | 3.27863411   | 85.84 | 1.16505821   | 2.70451978   | 70.93 |
| TIMP3    | 9.06680252   | 79.71 | 1.47113236   | 2.66871183   | 54.33 |
| TIMP4    | 0.28944674   | 24.83 | 1.48893885   | 1.00083381   | 64.11 |
| IL1RN    | 0.35324165   | 5.21  | Not detected | 0.02356153   | < 1%  |
